# Supplementary material for: Carrot (Daucus carota L.) Seed Germination Was Promoted by Hydro-Electro Hybrid Priming Through Regulating the Accumulation of Proteins Involved in Carbohydrate and Protein Metabolism
Source: Front Plant Sci. 2022 Feb 10;13:824439. doi: 10.3389/fpls.2022.824439 (PMC8868939; doi:10.3389/fpls.2022.824439)
Supplement: Supplementary file 1 [file Table_1.xlsx]

## Sheet: Sheet1
Supplementary table 1. Selected DEGs and primers used for qRT-PCR.
Protein Accession	Gene Name	Forward primer	Reverse primer
A0A175YFY1	LOC108200219	CCACTCTCACACTCTCATACAC	TTAGCAACAGGAGCAGAAGAAG
A0A164WP40	LOC108192982	CAAGGCTGTTCAAGAAGAGGAT	TGAGTAACACAGAGCACTACAC
A0A166AHI0	LOC108210638	CCATTCCGTTACAAGCATCAG	ACCGAGAAGTTCCGTTATCAG
A0A164XM95	LOC108221937	GCAGGTTCCTTTGACATTTAGA	CACCAGTGATCTTAGTGTTGAG
A0A161XEK6	LOC108228123	TCTCCACTTGAATCACTTACCA	ACCTCTCCATGATGATTTGTTG
A0A166FRM4	LOC108205252	AGTGAGAGGATTGATGGGAGAT	CACCTGGCAACAGAGATGG
A0A175YLM7	LOC108199296	ATGGCGAGGTTGGACAATG	CACACGGTTCATCTGAGAAGA
A0A166FRS9	LOC108204477	GTGGTGATAACCGATAGGATGT	ATTGAGTCTGCGGCTGTTC
A0A166IDX8	LOC108204499	AATGAACCAATCTCCGAACC	GCTTCCTCTGACTCACCTT
A0A164THB2	LOC108196427	TATCCGCAGTGACGAACT	AACCAACCTCAAGGACAAG
