# Supplementary material for: Carrot (Daucus carota L.) Seed Germination Was Promoted by Hydro-Electro Hybrid Priming Through Regulating the Accumulation of Proteins Involved in Carbohydrate and Protein Metabolism
Source: Front Plant Sci. 2022 Feb 10;13:824439. doi: 10.3389/fpls.2022.824439 (PMC8868939; doi:10.3389/fpls.2022.824439)
Supplement: Supplementary file 2 [file Table_2.xlsx]

## Sheet: Supplementary table 2A
Supplementary table 2A. DAPs between CK and HEHP
Accession	FC(HEHP/CK)	P_value(HEHP/CK)	Regulate	Significant	Description	ko_id	ko_name	go	pathways	cog	pfam	subloc	uni_peptide	coverage	mw	fdr
A0A166FWT4	22.1757	0.000166	up	yes	Uncharacterized protein OS=Daucus carota subsp. sativus OX=79200 GN=DCAR_000824 PE=4 SV=1	K11446	KDM5, JARID1	GO:0008152(biological_process:metabolic process); GO:0043229(cellular_component:intracellular organelle); GO:0003674(molecular_function:molecular_function); GO:0008168(molecular_function:methyltransferase activity); GO:0043227(cellular_component:membrane-bounded organelle); GO:0043226(cellular_component:organelle); GO:0034708(cellular_component:methyltransferase complex); GO:0006325(biological_pr…		ENOG410XR9J(S:Function unknown)	PF02373.23(JmjC:JmjC domain, hydroxylase); PF05965.15(FYRC:F/Y rich C-terminus); PF02375.18(JmjN:jmjN domain); PF02928.17(zf-C5HC2:C5HC2 zinc finger); PF05964.15(FYRN:F/Y-rich N-terminus)	nuclear	1	1	125.3	Medium
A0A166F6C4	8.9349	0.000177	up	yes	Uncharacterized protein OS=Daucus carota subsp. sativus OX=79200 GN=DCAR_008231 PE=4 SV=1			GO:0016844(molecular_function:strictosidine synthase activity); GO:0043226(cellular_component:organelle); GO:0016840(molecular_function:carbon-nitrogen lyase activity); GO:0016843(molecular_function:amine-lyase activity); GO:0016829(molecular_function:lyase activity); GO:0043229(cellular_component:intracellular organelle); GO:0043231(cellular_component:intracellular membrane-bounded organelle); G…		COG3386(G:Carbohydrate transport and metabolism)		ER	1	17	7.8	High
A0A175YQN1	9.21121	0.000657	up	yes	Uncharacterized protein OS=Daucus carota subsp. sativus OX=79200 GN=DCAR_027038 PE=4 SV=1			GO:0038023(molecular_function:signaling receptor activity); GO:0031406(molecular_function:carboxylic acid binding); GO:0019208(molecular_function:phosphatase regulator activity); GO:0060089(molecular_function:molecular transducer activity); GO:0003674(molecular_function:molecular_function); GO:0007165(biological_process:signal transduction); GO:0004857(molecular_function:enzyme inhibitor activity…		ENOG410ZD18(S:Function unknown)		cytoplasmic	1	63	6.3	High
A0A161YFE4	8.17802	1e-05	up	yes	Uncharacterized protein OS=Daucus carota subsp. sativus OX=79200 GN=DCAR_001623 PE=4 SV=1							cytoplasmic	1	1	56.4	High
A0A166DZ21	8.48437	0.000223	up	yes	Uncharacterized protein OS=Daucus carota subsp. sativus OX=79200 GN=DCAR_006697 PE=3 SV=1					ENOG410ZDEH(S:Function unknown)	PF05794.14(Tcp11:T-complex protein 11)	nuclear	1	1	145.2	High
A0A166FXR4	8.12826	0.000268	up	yes	NAD(P)-bd_dom domain-containing protein OS=Daucus carota subsp. sativus OX=79200 GN=DCAR_000854 PE=4 SV=1	K08679	E5.1.3.6	GO:0043227(cellular_component:membrane-bounded organelle); GO:0050662(molecular_function:coenzyme binding); GO:0031984(cellular_component:organelle subcompartment); GO:0031982(cellular_component:vesicle); GO:0031410(cellular_component:cytoplasmic vesicle); GO:0016021(cellular_component:integral component of membrane); GO:0005802(cellular_component:trans-Golgi network); GO:0005575(cellular_compone…	map00520(Amino sugar and nucleotide sugar metabolism)	COG0451(S:Function unknown)	PF16363.6(GDP_Man_Dehyd:GDP-mannose 4,6 dehydratase); PF01370.22(Epimerase:NAD dependent epimerase/dehydratase family); PF01073.20(3Beta_HSD:3-beta hydroxysteroid dehydrogenase/isomerase family); PF04321.18(RmlD_sub_bind:RmlD substrate binding domain); PF02719.16(Polysacc_synt_2:Polysaccharide biosynthesis protein); PF07993.13(NAD_binding_4:Male sterility protein)	Golgi apparatus	1	2	47.8	Medium
A0A164VGB4	7.3125	0.001986	up	yes	L-gulonolactone oxidase OS=Daucus carota subsp. sativus OX=79200 GN=DCAR_022331 PE=3 SV=1	K00103	GULO	GO:0016899(molecular_function:oxidoreductase activity, acting on the CH-OH group of donors, oxygen as acceptor); GO:0003674(molecular_function:molecular_function); GO:0005488(molecular_function:binding); GO:0043167(molecular_function:ion binding); GO:1901363(molecular_function:heterocyclic compound binding); GO:1901265(molecular_function:nucleoside phosphate binding); GO:0016491(molecular_functio…	map00053(Ascorbate and aldarate metabolism)	COG0277(S:Function unknown)	PF01565.24(FAD_binding_4:FAD binding domain); PF04030.15(ALO:D-arabinono-1,4-lactone oxidase)	Golgi apparatus	1	1	64.9	Medium
A0A166F773	7.69524	0.001455	up	yes	Uncharacterized protein OS=Daucus carota subsp. sativus OX=79200 GN=DCAR_008257 PE=3 SV=1	K01213	E3.2.1.67	GO:0071704(biological_process:organic substance metabolic process); GO:0005575(cellular_component:cellular_component); GO:0003674(molecular_function:molecular_function); GO:0005975(biological_process:carbohydrate metabolic process); GO:0044238(biological_process:primary metabolic process); GO:0003824(molecular_function:catalytic activity); GO:0016787(molecular_function:hydrolase activity); GO:000…	map00040(Pentose and glucuronate interconversions)	COG5434(E:Amino acid transport and metabolism)	PF00295.18(Glyco_hydro_28:Glycosyl hydrolases family 28); PF12708.8(Pectate_lyase_3:Pectate lyase superfamily protein)	extracellular	1	1	66.6	Medium
A0A161ZU19	6.32921	0.003315	up	yes	Methyltransferase OS=Daucus carota subsp. sativus OX=79200 GN=DCAR_022425 PE=3 SV=1	K08242	E2.1.1.143	GO:0003674(molecular_function:molecular_function); GO:0008168(molecular_function:methyltransferase activity); GO:1901362(biological_process:organic cyclic compound biosynthetic process); GO:1901360(biological_process:organic cyclic compound metabolic process); GO:1901576(biological_process:organic substance biosynthetic process); GO:0016021(cellular_component:integral component of membrane); GO:0…	map00100(Steroid biosynthesis)	ENOG410XP5G(S:Function unknown)	PF08498.11(Sterol_MT_C:Sterol methyltransferase C-terminal); PF08241.13(Methyltransf_11:Methyltransferase domain); PF02353.21(CMAS:Mycolic acid cyclopropane synthetase); PF13649.7(Methyltransf_25:Methyltransferase domain); PF13847.7(Methyltransf_31:Methyltransferase domain); PF13489.7(Methyltransf_23:Methyltransferase domain); PF01209.19(Ubie_methyltran:ubiE/COQ5 methyltransferase family); PF0824…	Golgi apparatus	2	5	39.5	High
A0A165WRS7	5.78512	9e-06	up	yes	Uncharacterized protein OS=Daucus carota subsp. sativus OX=79200 GN=DCAR_015032 PE=3 SV=1	K22983	CYP76A	GO:0043169(molecular_function:cation binding); GO:0004497(molecular_function:monooxygenase activity); GO:0016705(molecular_function:oxidoreductase activity, acting on paired donors, with incorporation or reduction of molecular oxygen); GO:0046914(molecular_function:transition metal ion binding); GO:0020037(molecular_function:heme binding); GO:0046906(molecular_function:tetrapyrrole binding); GO:0…		COG2124(G:Carbohydrate transport and metabolism)	PF00067.23(p450:Cytochrome P450)	plasma membrane	1	1	57.3	Medium
A0A175YIP0	6.80469	0	up	yes	Uncharacterized protein OS=Daucus carota subsp. sativus OX=79200 GN=DCAR_030291 PE=4 SV=1	K22382	WDR26			ENOG410XQ2U(S:Function unknown)	PF00400.33(WD40:WD domain, G-beta repeat)	cytoplasmic	1	1	60.3	Medium
A0A162A591	6.19178	0.000166	up	yes	Uncharacterized protein OS=Daucus carota subsp. sativus OX=79200 GN=DCAR_019634 PE=3 SV=1	K00422	E1.10.3.1	GO:0043169(molecular_function:cation binding); GO:0016682(molecular_function:oxidoreductase activity, acting on diphenols and related substances as donors, oxygen as acceptor); GO:0042440(biological_process:pigment metabolic process); GO:0004097(molecular_function:catechol oxidase activity); GO:0043167(molecular_function:ion binding); GO:0003824(molecular_function:catalytic activity); GO:0003674(…	map00950(Isoquinoline alkaloid biosynthesis); map00350(Tyrosine metabolism)	ENOG410XSH6(S:Function unknown)	PF12143.9(PPO1_KFDV:Protein of unknown function (DUF_B2219)); PF00264.21(Tyrosinase:Common central domain of tyrosinase); PF12142.9(PPO1_DWL:Polyphenol oxidase middle domain)	chloroplast	13	29	66.9	High
A0A166H5G6	5.79582	4e-05	up	yes	Peptidase A1 domain-containing protein OS=Daucus carota subsp. sativus OX=79200 GN=DCAR_002405 PE=4 SV=1			GO:0004175(molecular_function:endopeptidase activity); GO:0006807(biological_process:nitrogen compound metabolic process); GO:0003674(molecular_function:molecular_function); GO:0008233(molecular_function:peptidase activity); GO:1901575(biological_process:organic substance catabolic process); GO:0070001(molecular_function:aspartic-type peptidase activity); GO:0071704(biological_process:organic sub…			PF14541.7(TAXi_C:Xylanase inhibitor C-terminal); PF14543.7(TAXi_N:Xylanase inhibitor N-terminal)	extracellular	1	2	46.3	High
A0A162AFY2	6.13936	1.6e-05	up	yes	Uncharacterized protein OS=Daucus carota subsp. sativus OX=79200 GN=DCAR_009287 PE=4 SV=1			GO:0016070(biological_process:RNA metabolic process); GO:0016071(biological_process:mRNA metabolic process); GO:0044238(biological_process:primary metabolic process); GO:0006139(biological_process:nucleobase-containing compound metabolic process); GO:0009987(biological_process:cellular process); GO:0006725(biological_process:cellular aromatic compound metabolic process); GO:0044237(biological_pro…		ENOG410Z7Z7(J:Translation, ribosomal structure and biogenesis)	PF13041.7(PPR_2:PPR repeat family); PF01535.21(PPR:PPR repeat); PF13812.7(PPR_3:Pentatricopeptide repeat domain); PF12854.8(PPR_1:PPR repeat); PF17177.5(PPR_long:Pentacotripeptide-repeat region of PRORP)	chloroplast	1	1	81.8	Medium
A0A166E0N3	5.42115	0.000489	up	yes	DNA-directed RNA polymerase subunit OS=Daucus carota subsp. sativus OX=79200 GN=DCAR_006765 PE=3 SV=1	K16250	NRPD1	GO:0032774(biological_process:RNA biosynthetic process); GO:0030880(cellular_component:RNA polymerase complex); GO:0019222(biological_process:regulation of metabolic process); GO:0030422(biological_process:production of siRNA involved in RNA interference); GO:1990234(cellular_component:transferase complex); GO:0034062(molecular_function:RNA polymerase activity); GO:0090304(biological_process:nucl…		COG0086(F:Nucleotide transport and metabolism)	PF00623.21(RNA_pol_Rpb1_2:RNA polymerase Rpb1, domain 2); PF11523.9(DUF3223:Protein of unknown function (DUF3223)); PF04983.19(RNA_pol_Rpb1_3:RNA polymerase Rpb1, domain 3); PF04997.13(RNA_pol_Rpb1_1:RNA polymerase Rpb1, domain 1); PF04998.18(RNA_pol_Rpb1_5:RNA polymerase Rpb1, domain 5)	nuclear	1	1	156.1	Medium
A0A164Z3R3	6.83599	0.002793	up	yes	Uncharacterized protein OS=Daucus carota subsp. sativus OX=79200 GN=DCAR_018519 PE=4 SV=1			GO:0005575(cellular_component:cellular_component); GO:0016021(cellular_component:integral component of membrane); GO:0110165(cellular_component:cellular anatomical entity); GO:0031224(cellular_component:intrinsic component of membrane)		ENOG41123CA(S:Function unknown)	PF06101.12(Vps62:Vacuolar protein sorting-associated protein 62)	peroxisomal	1	2	61.8	Medium
A0A161ZK58	4.67838	2.8e-05	up	yes	Peptidase A1 domain-containing protein OS=Daucus carota subsp. sativus OX=79200 GN=DCAR_024586 PE=4 SV=1			GO:0016787(molecular_function:hydrolase activity); GO:0004175(molecular_function:endopeptidase activity); GO:0140096(molecular_function:catalytic activity, acting on a protein); GO:0070001(molecular_function:aspartic-type peptidase activity); GO:0003824(molecular_function:catalytic activity); GO:0070011(molecular_function:peptidase activity, acting on L-amino acid peptides); GO:0004190(molecular_…		ENOG410XNV7(G:Carbohydrate transport and metabolism)	PF14541.7(TAXi_C:Xylanase inhibitor C-terminal); PF14543.7(TAXi_N:Xylanase inhibitor N-terminal)	extracellular	2	4	47	High
A0A161X2S7	5.50252	4.4e-05	up	yes	Uncharacterized protein OS=Daucus carota subsp. sativus OX=79200 GN=DCAR_023827 PE=3 SV=1	K00423	E1.10.3.3	GO:0016020(cellular_component:membrane); GO:0050801(biological_process:ion homeostasis); GO:0005886(cellular_component:plasma membrane); GO:0042592(biological_process:homeostatic process); GO:0046872(molecular_function:metal ion binding); GO:0055072(biological_process:iron ion homeostasis); GO:0006826(biological_process:iron ion transport); GO:0005488(molecular_function:binding); GO:0055076(biolo…	map00053(Ascorbate and aldarate metabolism)	COG2132(O:Posttranslational modification, protein turnover, chaperones)	PF07732.16(Cu-oxidase_3:Multicopper oxidase); PF00394.23(Cu-oxidase:Multicopper oxidase); PF07731.15(Cu-oxidase_2:Multicopper oxidase)	extracellular	1	1	62.1	High
A0A175YPA8	5.34221	0	up	yes	Uncharacterized protein OS=Daucus carota subsp. sativus OX=79200 GN=DCAR_027916 PE=4 SV=1					ENOG4111URZ(S:Function unknown)	PF04398.13(DUF538:Protein of unknown function, DUF538)	cytoplasmic	8	39	20.9	High
A0A166A2G3	5.45062	6.9e-05	up	yes	Pectinesterase OS=Daucus carota subsp. sativus OX=79200 GN=DCAR_009418 PE=3 SV=1	K01051	E3.1.1.11	GO:0071704(biological_process:organic substance metabolic process); GO:0010393(biological_process:galacturonan metabolic process); GO:0003674(molecular_function:molecular_function); GO:0004857(molecular_function:enzyme inhibitor activity); GO:0098772(molecular_function:molecular function regulator); GO:0031224(cellular_component:intrinsic component of membrane); GO:1901575(biological_process:orga…	map00040(Pentose and glucuronate interconversions)	COG4677(G:Carbohydrate transport and metabolism)	PF01095.20(Pectinesterase:Pectinesterase); PF04043.16(PMEI:Plant invertase/pectin methylesterase inhibitor)	ER	1	1	59.8	High
A0A175YQN6	5.01549	3.1e-05	up	yes	Peptidase A1 domain-containing protein OS=Daucus carota subsp. sativus OX=79200 GN=DCAR_027160 PE=4 SV=1			GO:0016787(molecular_function:hydrolase activity); GO:0004175(molecular_function:endopeptidase activity); GO:0140096(molecular_function:catalytic activity, acting on a protein); GO:0070001(molecular_function:aspartic-type peptidase activity); GO:0003824(molecular_function:catalytic activity); GO:0070011(molecular_function:peptidase activity, acting on L-amino acid peptides); GO:0004190(molecular_…		ENOG410XNV7(G:Carbohydrate transport and metabolism)	PF14541.7(TAXi_C:Xylanase inhibitor C-terminal); PF14543.7(TAXi_N:Xylanase inhibitor N-terminal)	ER	2	8	44.9	High
A0A161X3N5	3.89482	7.9e-05	up	yes	Helicase C-terminal domain-containing protein OS=Daucus carota subsp. sativus OX=79200 GN=DCAR_024177 PE=4 SV=1	K17675	SUPV3L1, SUV3	GO:0009628(biological_process:response to abiotic stimulus); GO:0048584(biological_process:positive regulation of response to stimulus); GO:0048583(biological_process:regulation of response to stimulus); GO:0000959(biological_process:mitochondrial RNA metabolic process); GO:1901360(biological_process:organic cyclic compound metabolic process); GO:1901361(biological_process:organic cyclic compound…		ENOG410XSEY(L:Replication, recombination and repair)	PF00271.32(Helicase_C:Helicase conserved C-terminal domain)	chloroplast	1	2	38.4	Medium
A0A165XG72	4.95144	0.001405	up	yes	Uncharacterized protein OS=Daucus carota subsp. sativus OX=79200 GN=DCAR_014501 PE=4 SV=1	K05929	E2.1.1.103, NMT	GO:0006656(biological_process:phosphatidylcholine biosynthetic process); GO:0006650(biological_process:glycerophospholipid metabolic process); GO:0044249(biological_process:cellular biosynthetic process); GO:0006807(biological_process:nitrogen compound metabolic process); GO:0003674(molecular_function:molecular_function); GO:0008168(molecular_function:methyltransferase activity); GO:0044255(biolo…	map00564(Glycerophospholipid metabolism)	ENOG410XP5G(S:Function unknown)	PF08241.13(Methyltransf_11:Methyltransferase domain); PF13649.7(Methyltransf_25:Methyltransferase domain); PF13847.7(Methyltransf_31:Methyltransferase domain); PF13489.7(Methyltransf_23:Methyltransferase domain); PF08242.13(Methyltransf_12:Methyltransferase domain); PF01209.19(Ubie_methyltran:ubiE/COQ5 methyltransferase family); PF02353.21(CMAS:Mycolic acid cyclopropane synthetase); PF05891.13(Me…	cytoplasmic	10	23	58.3	High
A0A162AX65	4.27409	9e-06	up	yes	O-fucosyltransferase family protein OS=Daucus carota subsp. sativus OX=79200 GN=DCAR_007940 PE=3 SV=1			GO:0044238(biological_process:primary metabolic process); GO:0005975(biological_process:carbohydrate metabolic process); GO:0016757(molecular_function:transferase activity, transferring glycosyl groups); GO:0003824(molecular_function:catalytic activity); GO:0005996(biological_process:monosaccharide metabolic process); GO:0016021(cellular_component:integral component of membrane); GO:0019318(biolo…		ENOG410YEG1(S:Function unknown)	PF10250.10(O-FucT:GDP-fucose protein O-fucosyltransferase)	Golgi apparatus	1	1	67.7	High
A0A166BTB0	4.38839	1.5e-05	up	yes	Str_synth domain-containing protein OS=Daucus carota subsp. sativus OX=79200 GN=DCAR_011595 PE=3 SV=1			GO:0016844(molecular_function:strictosidine synthase activity); GO:0016840(molecular_function:carbon-nitrogen lyase activity); GO:0016843(molecular_function:amine-lyase activity); GO:0016829(molecular_function:lyase activity); GO:0003824(molecular_function:catalytic activity); GO:0009058(biological_process:biosynthetic process); GO:0003674(molecular_function:molecular_function); GO:0008152(biolog…		COG3386(G:Carbohydrate transport and metabolism)	PF03088.17(Str_synth:Strictosidine synthase); PF08450.13(SGL:SMP-30/Gluconolactonase/LRE-like region)	vacuolar	1	16	36.7	High
A0A166F6E0	4.93587	8.4e-05	up	yes	Str_synth domain-containing protein OS=Daucus carota subsp. sativus OX=79200 GN=DCAR_008233 PE=3 SV=1			GO:0016844(molecular_function:strictosidine synthase activity); GO:0016840(molecular_function:carbon-nitrogen lyase activity); GO:0016843(molecular_function:amine-lyase activity); GO:0016829(molecular_function:lyase activity); GO:0003824(molecular_function:catalytic activity); GO:0009058(biological_process:biosynthetic process); GO:0003674(molecular_function:molecular_function); GO:0008152(biolog…		COG3386(S:Function unknown)	PF03088.17(Str_synth:Strictosidine synthase)	vacuolar	5	21	34.5	High
A0A161WU56	4.69806	0.01074	up	yes	Uncharacterized protein OS=Daucus carota subsp. sativus OX=79200 GN=DCAR_020518 PE=3 SV=1			GO:0044238(biological_process:primary metabolic process); GO:0005975(biological_process:carbohydrate metabolic process); GO:0016787(molecular_function:hydrolase activity); GO:0003824(molecular_function:catalytic activity); GO:0016798(molecular_function:hydrolase activity, acting on glycosyl bonds); GO:0071704(biological_process:organic substance metabolic process); GO:0008150(biological_process:b…		ENOG410YAHP(G:Carbohydrate transport and metabolism)	PF00332.19(Glyco_hydro_17:Glycosyl hydrolases family 17)	vacuolar	18	40	69.4	High
A0A162AAW0	4.82552	0.002811	up	yes	Mannan endo-1,4-beta-mannosidase OS=Daucus carota subsp. sativus OX=79200 GN=DCAR_014066 PE=3 SV=1	K19355	MAN	GO:0044238(biological_process:primary metabolic process); GO:0005975(biological_process:carbohydrate metabolic process); GO:0016787(molecular_function:hydrolase activity); GO:0003824(molecular_function:catalytic activity); GO:0016798(molecular_function:hydrolase activity, acting on glycosyl bonds); GO:0071704(biological_process:organic substance metabolic process); GO:0008150(biological_process:b…	map00051(Fructose and mannose metabolism)	COG3934(G:Carbohydrate transport and metabolism)	PF00150.19(Cellulase:Cellulase (glycosyl hydrolase family 5))	vacuolar	5	56	46.1	High
A0A161XX59	4.54179	3.3e-05	up	yes	Uncharacterized protein OS=Daucus carota subsp. sativus OX=79200 GN=DCAR_009951 PE=3 SV=1			GO:0080090(biological_process:regulation of primary metabolic process); GO:0019222(biological_process:regulation of metabolic process); GO:0031328(biological_process:positive regulation of cellular biosynthetic process); GO:0031326(biological_process:regulation of cellular biosynthetic process); GO:0031325(biological_process:positive regulation of cellular metabolic process); GO:0051173(biologica…		ENOG410YDRX(S:Function unknown)	PF05142.13(DUF702:Domain of unknown function (DUF702))	nuclear	1	3	37.2	Medium
A0A166EBF4	4.39772	0.02516	up	yes	Uncharacterized protein OS=Daucus carota subsp. sativus OX=79200 GN=DCAR_007173 PE=4 SV=1							extracellular	7	43	23.1	High
A0A161ZSL5	4.92937	0.000197	up	yes	Uncharacterized protein OS=Daucus carota subsp. sativus OX=79200 GN=DCAR_021863 PE=4 SV=1	K22684	MCA1			ENOG410Y41C(O:Posttranslational modification, protein turnover, chaperones)	PF00656.23(Peptidase_C14:Caspase domain)	cytoplasmic	1	2	40.3	Medium
A0A162A733	4.24688	0.004957	up	yes	Vacuolar protein sorting-associated protein 41 homolog OS=Daucus carota subsp. sativus OX=79200 GN=DCAR_015496 PE=3 SV=1	K20184	VPS41	GO:0008104(biological_process:protein localization); GO:0033043(biological_process:regulation of organelle organization); GO:0051049(biological_process:regulation of transport); GO:0072666(biological_process:establishment of protein localization to vacuole); GO:0072665(biological_process:protein localization to vacuole); GO:0051128(biological_process:regulation of cellular component organization)…		ENOG410XQBC(S:Function unknown)	PF00637.21(Clathrin:Region in Clathrin and VPS)	cytoplasmic	1	1	101.4	Medium
A0A166EEW4	4.35236	0.000135	up	yes	Bet_v_1 domain-containing protein OS=Daucus carota subsp. sativus OX=79200 GN=DCAR_007308 PE=4 SV=1			GO:0006952(biological_process:defense response); GO:0006950(biological_process:response to stress); GO:0008150(biological_process:biological_process); GO:0050896(biological_process:response to stimulus)		ENOG4111C37(S:Function unknown)	PF00407.20(Bet_v_1:Pathogenesis-related protein Bet v 1 family)	cytoplasmic	2	15	17.1	High
A0A164XQJ4	4.1208	4.8e-05	up	yes	1,4-alpha-glucan branching enzyme OS=Daucus carota subsp. sativus OX=79200 GN=DCAR_016718 PE=3 SV=1	K00700	GBE1, glgB	GO:0043231(cellular_component:intracellular membrane-bounded organelle); GO:0016798(molecular_function:hydrolase activity, acting on glycosyl bonds); GO:0009791(biological_process:post-embryonic development); GO:0044249(biological_process:cellular biosynthetic process); GO:0043229(cellular_component:intracellular organelle); GO:0003674(molecular_function:molecular_function); GO:0005488(molecular_…	map00500(Starch and sucrose metabolism)	COG0296(S:Function unknown)	PF02806.19(Alpha-amylase_C:Alpha amylase, C-terminal all-beta domain); PF00128.25(Alpha-amylase:Alpha amylase, catalytic domain); PF02922.19(CBM_48:Carbohydrate-binding module 48 (Isoamylase N-terminal domain))	chloroplast	1	1	110.8	Medium
A0A175YEQ0	4.26855	0.000711	up	yes	AAA_assoc domain-containing protein OS=Daucus carota subsp. sativus OX=79200 GN=DCAR_029588 PE=4 SV=1	K08900	BCS1	GO:0043168(molecular_function:anion binding); GO:0043169(molecular_function:cation binding); GO:0030554(molecular_function:adenyl nucleotide binding); GO:0035639(molecular_function:purine ribonucleoside triphosphate binding); GO:0000166(molecular_function:nucleotide binding); GO:0097159(molecular_function:organic cyclic compound binding); GO:1901265(molecular_function:nucleoside phosphate binding…		COG0465(S:Function unknown)	PF14363.7(AAA_assoc:Domain associated at C-terminal with AAA)	ER	1	2	33.1	Medium
A0A175YG67	3.96605	0.000841	up	yes	Uncharacterized protein OS=Daucus carota subsp. sativus OX=79200 GN=DCAR_029856 PE=4 SV=1	K23871	CGR	GO:0005575(cellular_component:cellular_component); GO:0016021(cellular_component:integral component of membrane); GO:0110165(cellular_component:cellular anatomical entity); GO:0031224(cellular_component:intrinsic component of membrane)		ENOG4111QN3(S:Function unknown)		Golgi apparatus	1	1	65.3	Medium
A0A165Y8S4	3.99209	2.6e-05	up	yes	Fe2OG dioxygenase domain-containing protein OS=Daucus carota subsp. sativus OX=79200 GN=DCAR_013744 PE=3 SV=1	K23145	S8H	GO:0004497(molecular_function:monooxygenase activity); GO:0010038(biological_process:response to metal ion); GO:0009698(biological_process:phenylpropanoid metabolic process); GO:0016706(molecular_function:oxidoreductase activity, acting on paired donors, with incorporation or reduction of molecular oxygen, 2-oxoglutarate as one donor, and incorporation of one atom each of oxygen into both donors)…		COG3491(S:Function unknown)	PF03171.21(2OG-FeII_Oxy:2OG-Fe(II) oxygenase superfamily); PF14226.7(DIOX_N:non-haem dioxygenase in morphine synthesis N-terminal)	cytoplasmic	9	30	40.7	High
A0A175YH66	4.19381	0.000268	up	yes	TPT domain-containing protein OS=Daucus carota subsp. sativus OX=79200 GN=DCAR_030422 PE=4 SV=1			GO:0005575(cellular_component:cellular_component); GO:0016021(cellular_component:integral component of membrane); GO:0110165(cellular_component:cellular anatomical entity); GO:0031224(cellular_component:intrinsic component of membrane)		ENOG410XP1S(D:Cell cycle control, cell division, chromosome partitioning); ENOG410XP1S(T:Signal transduction mechanisms); ENOG410XP1S(Z:Cytoskeleton)	PF03151.17(TPT:Triose-phosphate Transporter family)	Golgi apparatus	1	2	41.2	Medium
A0A169WU65	4.0491	0.004818	up	yes	S-adenosylmethionine synthase OS=Daucus carota subsp. sativus OX=79200 GN=DCAR_002546 PE=3 SV=1	K00789	metK	GO:0035639(molecular_function:purine ribonucleoside triphosphate binding); GO:0006730(biological_process:one-carbon metabolic process); GO:0044249(biological_process:cellular biosynthetic process); GO:0003674(molecular_function:molecular_function); GO:0044281(biological_process:small molecule metabolic process); GO:0000166(molecular_function:nucleotide binding); GO:1901363(molecular_function:hete…	map00270(Cysteine and methionine metabolism)	COG0192(H:Coenzyme transport and metabolism)	PF02773.17(S-AdoMet_synt_C:S-adenosylmethionine synthetase, C-terminal domain); PF02772.17(S-AdoMet_synt_M:S-adenosylmethionine synthetase, central domain); PF00438.21(S-AdoMet_synt_N:S-adenosylmethionine synthetase, N-terminal domain)	cytoplasmic	4	75	42.8	High
A0A169W9R3	3.8674	0.002805	up	yes	Uncharacterized protein OS=Daucus carota subsp. sativus OX=79200 GN=DCAR_010600 PE=4 SV=1	K03544	clpX, CLPX	GO:0006457(biological_process:protein folding); GO:0035639(molecular_function:purine ribonucleoside triphosphate binding); GO:1901363(molecular_function:heterocyclic compound binding); GO:0043229(cellular_component:intracellular organelle); GO:0003674(molecular_function:molecular_function); GO:0051082(molecular_function:unfolded protein binding); GO:0008233(molecular_function:peptidase activity);…		COG1219(O:Posttranslational modification, protein turnover, chaperones)	PF07724.15(AAA_2:AAA domain (Cdc48 subfamily)); PF10431.10(ClpB_D2-small:C-terminal, D2-small domain, of ClpB protein); PF00004.30(AAA:ATPase family associated with various cellular activities (AAA))	mitochondrial	1	2	59.6	High
A0A175YIB6	3.91423	2e-06	up	yes	J domain-containing protein OS=Daucus carota subsp. sativus OX=79200 GN=DCAR_030450 PE=4 SV=1	K09534	DNAJC14	GO:0005575(cellular_component:cellular_component); GO:0016021(cellular_component:integral component of membrane); GO:0110165(cellular_component:cellular anatomical entity); GO:0031224(cellular_component:intrinsic component of membrane)		ENOG410Z2TP(O:Posttranslational modification, protein turnover, chaperones)	PF14901.7(Jiv90:Cleavage inducing molecular chaperone); PF00226.32(DnaJ:DnaJ domain)	nuclear	1	2	81.6	Medium
A0A166GWZ8	3.81899	0.000124	up	yes	Uncharacterized protein OS=Daucus carota subsp. sativus OX=79200 GN=DCAR_002104 PE=4 SV=1			GO:0140098(molecular_function:catalytic activity, acting on RNA); GO:0097747(molecular_function:RNA polymerase activity); GO:0016772(molecular_function:transferase activity, transferring phosphorus-containing groups); GO:0016779(molecular_function:nucleotidyltransferase activity); GO:0034062(molecular_function:RNA polymerase activity); GO:0003824(molecular_function:catalytic activity); GO:0016740…		ENOG410YHQZ(S:Function unknown)	PF14009.7(DUF4228:Domain of unknown function (DUF4228))	cytoplasmic	1	6	25.2	Medium
A0A161ZW24	3.63916	0.002341	up	yes	MYB transcription factor OS=Daucus carota subsp. sativus OX=79200 GN=DCAR_021465 PE=4 SV=1	K09422	MYBP	GO:0034728(biological_process:nucleosome organization); GO:0022607(biological_process:cellular component assembly); GO:0043933(biological_process:macromolecular complex subunit organization); GO:0000786(cellular_component:nucleosome); GO:0044815(cellular_component:DNA packaging complex); GO:0003674(molecular_function:molecular_function); GO:0005488(molecular_function:binding); GO:0003676(molecula…		ENOG410ZJ5H(K:Transcription); ENOG4111CH3(B:Chromatin structure and dynamics); ENOG4111SQS(K:Transcription)	PF00249.32(Myb_DNA-binding:Myb-like DNA-binding domain); PF00538.20(Linker_histone:linker histone H1 and H5 family)	nuclear	1	7	20.4	Medium
A0A166I510	3.58478	5e-06	up	yes	UTP--glucose-1-phosphate uridylyltransferase OS=Daucus carota subsp. sativus OX=79200 GN=DCAR_003411 PE=3 SV=1	K00963	UGP2, galU, galF	GO:0034641(biological_process:cellular nitrogen compound metabolic process); GO:0006807(biological_process:nitrogen compound metabolic process); GO:0003674(molecular_function:molecular_function); GO:0044281(biological_process:small molecule metabolic process); GO:1901360(biological_process:organic cyclic compound metabolic process); GO:0005737(cellular_component:cytoplasm); GO:0006139(biological_…	map00520(Amino sugar and nucleotide sugar metabolism); map00040(Pentose and glucuronate interconversions); map00500(Starch and sucrose metabolism); map00052(Galactose metabolism)	COG4284(O:Posttranslational modification, protein turnover, chaperones)	PF01704.19(UDPGP:UTP--glucose-1-phosphate uridylyltransferase)	chloroplast	8	43	45.8	High
A0A161WZ70	3.73996	9.4e-05	up	yes	Lipoxygenase OS=Daucus carota subsp. sativus OX=79200 GN=DCAR_004813 PE=3 SV=1	K15718	LOX1_5	GO:0006633(biological_process:fatty acid biosynthetic process); GO:0006631(biological_process:fatty acid metabolic process); GO:0019752(biological_process:carboxylic acid metabolic process); GO:0016053(biological_process:organic acid biosynthetic process); GO:0044249(biological_process:cellular biosynthetic process); GO:0003674(molecular_function:molecular_function); GO:0044281(biological_process…	map00591(Linoleic acid metabolism)	ENOG410YN4N(S:Function unknown)	PF00305.20(Lipoxygenase:Lipoxygenase); PF01477.24(PLAT:PLAT/LH2 domain)	cytoplasmic	21	32	95.4	High
A0A175YPY9	3.44687	0.000217	up	yes	Peptidase A1 domain-containing protein OS=Daucus carota subsp. sativus OX=79200 GN=DCAR_027161 PE=4 SV=1			GO:0016787(molecular_function:hydrolase activity); GO:0004175(molecular_function:endopeptidase activity); GO:0140096(molecular_function:catalytic activity, acting on a protein); GO:0070001(molecular_function:aspartic-type peptidase activity); GO:0003824(molecular_function:catalytic activity); GO:0070011(molecular_function:peptidase activity, acting on L-amino acid peptides); GO:0004190(molecular_…		ENOG410XNV7(O:Posttranslational modification, protein turnover, chaperones)	PF14541.7(TAXi_C:Xylanase inhibitor C-terminal); PF14543.7(TAXi_N:Xylanase inhibitor N-terminal)	peroxisomal	17	49	45	High
A0A169WSC3	3.27147	0.000806	up	yes	TPR_REGION domain-containing protein OS=Daucus carota subsp. sativus OX=79200 GN=DCAR_002485 PE=4 SV=1					ENOG410YB9I(S:Function unknown)	PF00515.29(TPR_1:Tetratricopeptide repeat); PF07719.18(TPR_2:Tetratricopeptide repeat)	cytoplasmic	1	1	49.3	High
A0A166G7Q5	3.38597	0.000271	up	yes	Mannan endo-1,4-beta-mannosidase OS=Daucus carota subsp. sativus OX=79200 GN=DCAR_001169 PE=3 SV=1	K19355	MAN	GO:0044238(biological_process:primary metabolic process); GO:0003674(molecular_function:molecular_function); GO:0005975(biological_process:carbohydrate metabolic process); GO:0004567(molecular_function:beta-mannosidase activity); GO:0016787(molecular_function:hydrolase activity); GO:0003824(molecular_function:catalytic activity); GO:0016985(molecular_function:mannan endo-1,4-beta-mannosidase acti…	map00051(Fructose and mannose metabolism)	COG3934(G:Carbohydrate transport and metabolism)	PF07279.12(DUF1442:Protein of unknown function (DUF1442)); PF00150.19(Cellulase:Cellulase (glycosyl hydrolase family 5))	vacuolar	5	41	69.4	High
A0A161ZHD7	3.37734	3.1e-05	up	yes	Bet_v_1 domain-containing protein OS=Daucus carota subsp. sativus OX=79200 GN=DCAR_023316 PE=4 SV=1			GO:0005488(molecular_function:binding); GO:0009617(biological_process:response to bacterium); GO:0038023(molecular_function:signaling receptor activity); GO:0004864(molecular_function:protein phosphatase inhibitor activity); GO:0031406(molecular_function:carboxylic acid binding); GO:0019208(molecular_function:phosphatase regulator activity); GO:0060089(molecular_function:molecular transducer acti…		ENOG410ZD18(S:Function unknown)	PF00407.20(Bet_v_1:Pathogenesis-related protein Bet v 1 family)	cytoplasmic	7	49	16.5	High
A0A164ZVS4	3.01277	0.003778	up	yes	Uncharacterized protein OS=Daucus carota subsp. sativus OX=79200 GN=DCAR_019727 PE=4 SV=1							extracellular	1	3	40.7	High
A0A166B793	3.08481	3.2e-05	up	yes	Uncharacterized protein OS=Daucus carota subsp. sativus OX=79200 GN=DCAR_011202 PE=3 SV=1			GO:0016787(molecular_function:hydrolase activity); GO:0016021(cellular_component:integral component of membrane); GO:0016788(molecular_function:hydrolase activity, acting on ester bonds); GO:0005575(cellular_component:cellular_component); GO:0003824(molecular_function:catalytic activity); GO:0003674(molecular_function:molecular_function); GO:0031224(cellular_component:intrinsic component of membr…		ENOG41114N8(S:Function unknown)	PF00657.23(Lipase_GDSL:GDSL-like Lipase/Acylhydrolase)	Golgi apparatus	3	13	41.9	High
A0A162ABG9	3.07944	0.002087	up	yes	Phospholipase OS=Daucus carota subsp. sativus OX=79200 GN=DCAR_014258 PE=3 SV=1	K01115	PLD1_2	GO:0006654(biological_process:phosphatidic acid biosynthetic process); GO:0006650(biological_process:glycerophospholipid metabolic process); GO:0042578(molecular_function:phosphoric ester hydrolase activity); GO:0044249(biological_process:cellular biosynthetic process); GO:0003674(molecular_function:molecular_function); GO:0007165(biological_process:signal transduction); GO:0035556(biological_pro…	map00565(Ether lipid metabolism); map00564(Glycerophospholipid metabolism); map04144(Endocytosis)	COG1502(S:Function unknown)	PF13091.7(PLDc_2:PLD-like domain); PF00614.23(PLDc:Phospholipase D Active site motif)	cytoplasmic	1	1	131.1	Medium
A0A162AGM9	3.31127	0.000154	up	yes	Uncharacterized protein OS=Daucus carota subsp. sativus OX=79200 GN=DCAR_009385 PE=3 SV=1	K18857	ADH1	GO:0005488(molecular_function:binding); GO:0044282(biological_process:small molecule catabolic process); GO:0044248(biological_process:cellular catabolic process); GO:0003674(molecular_function:molecular_function); GO:0044281(biological_process:small molecule metabolic process); GO:0110095(biological_process:cellular detoxification of aldehyde); GO:0098754(biological_process:detoxification); GO:0…	map00010(Glycolysis / Gluconeogenesis); map00592(alpha-Linolenic acid metabolism); map00071(Fatty acid degradation); map00350(Tyrosine metabolism)	COG1062(C:Energy production and conversion)	PF00107.27(ADH_zinc_N:Zinc-binding dehydrogenase); PF08240.13(ADH_N:Alcohol dehydrogenase GroES-like domain); PF16912.6(Glu_dehyd_C:Glucose dehydrogenase C-terminus)	chloroplast	2	53	38.5	High
A0A166BNW2	3.44021	1e-05	up	yes	PABC domain-containing protein OS=Daucus carota subsp. sativus OX=79200 GN=DCAR_011436 PE=4 SV=1	K13126	PABPC	GO:0008143(molecular_function:poly(A) binding); GO:0043229(cellular_component:intracellular organelle); GO:0003674(molecular_function:molecular_function); GO:0005488(molecular_function:binding); GO:0003676(molecular_function:nucleic acid binding); GO:0008187(molecular_function:poly-pyrimidine tract binding); GO:0043227(cellular_component:membrane-bounded organelle); GO:0043226(cellular_component:…	map03018(RNA degradation); map03013(RNA transport); map03015(mRNA surveillance pathway)	ENOG410XR5X(J:Translation, ribosomal structure and biogenesis)	PF00658.19(PABP:Poly-adenylate binding protein, unique domain)	cytoplasmic	1	47	7.6	High
A0A166ETS4	2.9067	0.000452	up	yes	UDP-glucose 4-epimerase OS=Daucus carota subsp. sativus OX=79200 GN=DCAR_007808 PE=3 SV=1	K12448	UXE, uxe	GO:0044238(biological_process:primary metabolic process); GO:0016854(molecular_function:racemase and epimerase activity); GO:0005975(biological_process:carbohydrate metabolic process); GO:0016853(molecular_function:isomerase activity); GO:0071704(biological_process:organic substance metabolic process); GO:0016857(molecular_function:racemase and epimerase activity, acting on carbohydrates and deri…	map00520(Amino sugar and nucleotide sugar metabolism)	COG1087(S:Function unknown)	PF16363.6(GDP_Man_Dehyd:GDP-mannose 4,6 dehydratase); PF01370.22(Epimerase:NAD dependent epimerase/dehydratase family); PF01073.20(3Beta_HSD:3-beta hydroxysteroid dehydrogenase/isomerase family); PF02719.16(Polysacc_synt_2:Polysaccharide biosynthesis protein); PF04321.18(RmlD_sub_bind:RmlD substrate binding domain); PF13460.7(NAD_binding_10:NAD(P)H-binding); PF07993.13(NAD_binding_4:Male sterilit…	Golgi apparatus	1	3	43.3	Medium
A0A164YDD5	2.75109	0.000812	up	yes	Uncharacterized protein OS=Daucus carota subsp. sativus OX=79200 GN=DCAR_017590 PE=3 SV=1			GO:0005575(cellular_component:cellular_component); GO:0016021(cellular_component:integral component of membrane); GO:0110165(cellular_component:cellular anatomical entity); GO:0031224(cellular_component:intrinsic component of membrane)		ENOG410YAJT(S:Function unknown)	PF13839.7(PC-Esterase:GDSL/SGNH-like Acyl-Esterase family found in Pmr5 and Cas1p); PF14416.7(PMR5N:PMR5 N terminal Domain); PF13855.7(LRR_8:Leucine rich repeat)	Golgi apparatus	1	1	137.5	High
A0A161ZSL3	3.49104	6e-05	up	yes	Uncharacterized protein OS=Daucus carota subsp. sativus OX=79200 GN=DCAR_023067 PE=3 SV=1	K14638	SLC15A3_4, PHT	GO:0015295(molecular_function:solute:proton symporter activity); GO:0015833(biological_process:peptide transport); GO:0003674(molecular_function:molecular_function); GO:0005488(molecular_function:binding); GO:0031224(cellular_component:intrinsic component of membrane); GO:0019787(molecular_function:ubiquitin-like protein transferase activity); GO:0015075(molecular_function:ion transmembrane trans…		COG3104(E:Amino acid transport and metabolism)	PF00854.22(PTR2:POT family); PF07690.17(MFS_1:Major Facilitator Superfamily)	Golgi apparatus	1	1	100.9	Medium
A0A164VF71	3.04115	0.002586	up	yes	SAM_MT_ERG6_SMT domain-containing protein OS=Daucus carota subsp. sativus OX=79200 GN=DCAR_022380 PE=3 SV=1	K00559	SMT1, ERG6	GO:0032502(biological_process:developmental process); GO:0005783(cellular_component:endoplasmic reticulum); GO:0003824(molecular_function:catalytic activity); GO:0009790(biological_process:embryo development); GO:0043229(cellular_component:intracellular organelle); GO:0032501(biological_process:multicellular organismal process); GO:0003674(molecular_function:molecular_function); GO:0008169(molecu…	map00100(Steroid biosynthesis)	ENOG410XP5G(S:Function unknown)	PF08498.11(Sterol_MT_C:Sterol methyltransferase C-terminal); PF02353.21(CMAS:Mycolic acid cyclopropane synthetase)	chloroplast	3	17	23.3	High
A0A164VQ80	2.89889	3.3e-05	up	yes	Uncharacterized protein OS=Daucus carota subsp. sativus OX=79200 GN=DCAR_021948 PE=3 SV=1	K16296	SCPL-I	GO:0016787(molecular_function:hydrolase activity); GO:0016825(molecular_function:hydrolase activity, acting on acid phosphorus-nitrogen bonds); GO:0003824(molecular_function:catalytic activity); GO:0016021(cellular_component:integral component of membrane); GO:0004180(molecular_function:carboxypeptidase activity); GO:0140096(molecular_function:catalytic activity, acting on a protein); GO:0017171(…			PF00450.23(Peptidase_S10:Serine carboxypeptidase)	extracellular	2	7	166.6	High
A0A161WQK3	2.82708	0.000344	up	yes	Xyloglucan endotransglucosylase/hydrolase OS=Daucus carota subsp. sativus OX=79200 GN=DCAR_009699 PE=3 SV=1	K08235	E2.4.1.207	GO:0003674(molecular_function:molecular_function); GO:0016798(molecular_function:hydrolase activity, acting on glycosyl bonds); GO:0048046(cellular_component:apoplast); GO:0044036(biological_process:cell wall macromolecule metabolic process); GO:0045229(biological_process:external encapsulating structure organization); GO:0031224(cellular_component:intrinsic component of membrane); GO:0071554(bio…		ENOG410YBFU(G:Carbohydrate transport and metabolism)	PF00722.22(Glyco_hydro_16:Glycosyl hydrolases family 16); PF06955.13(XET_C:Xyloglucan endo-transglycosylase (XET) C-terminus)	Golgi apparatus	1	3	34.1	Medium
A0A175YG78	2.80769	0.004696	up	yes	Non-specific lipid-transfer protein OS=Daucus carota subsp. sativus OX=79200 GN=DCAR_029747 PE=3 SV=1			GO:0006810(biological_process:transport); GO:0006869(biological_process:lipid transport); GO:0016020(cellular_component:membrane); GO:0008289(molecular_function:lipid binding); GO:0005575(cellular_component:cellular_component); GO:0003674(molecular_function:molecular_function); GO:0005488(molecular_function:binding); GO:0071702(biological_process:organic substance transport); GO:0008150(biologica…			PF00234.23(Tryp_alpha_amyl:Protease inhibitor/seed storage/LTP family)	extracellular	8	66	11.5	High
A0A165XVH1	2.9346	1e-05	up	yes	Mannan endo-1,4-beta-mannosidase OS=Daucus carota subsp. sativus OX=79200 GN=DCAR_014065 PE=3 SV=1	K19355	MAN	GO:0044238(biological_process:primary metabolic process); GO:0003674(molecular_function:molecular_function); GO:0005975(biological_process:carbohydrate metabolic process); GO:0004567(molecular_function:beta-mannosidase activity); GO:0016787(molecular_function:hydrolase activity); GO:0016021(cellular_component:integral component of membrane); GO:0016985(molecular_function:mannan endo-1,4-beta-mann…	map00051(Fructose and mannose metabolism)	COG3934(G:Carbohydrate transport and metabolism)	PF00150.19(Cellulase:Cellulase (glycosyl hydrolase family 5))	vacuolar	5	55	39.3	High
A0A165A8Y5	2.80184	5e-06	up	yes	Uncharacterized protein OS=Daucus carota subsp. sativus OX=79200 GN=DCAR_015519 PE=4 SV=1							cytoplasmic	1	6	12.5	Medium
A0A162AFT0	2.97008	0.007057	up	yes	Glycosyltransferase OS=Daucus carota subsp. sativus OX=79200 GN=DCAR_009015 PE=3 SV=1			GO:0016758(molecular_function:transferase activity, transferring hexosyl groups); GO:0016740(molecular_function:transferase activity); GO:0003674(molecular_function:molecular_function); GO:0016757(molecular_function:transferase activity, transferring glycosyl groups); GO:0003824(molecular_function:catalytic activity)		COG1819(U:Intracellular trafficking, secretion, and vesicular transport)	PF00201.19(UDPGT:UDP-glucoronosyl and UDP-glucosyl transferase)	cytoplasmic	4	7	55	High
A0A161ZVE4	3.04447	0.000363	up	yes	Cytochrome b5 heme-binding domain-containing protein OS=Daucus carota subsp. sativus OX=79200 GN=DCAR_020633 PE=4 SV=1	K17278	PGRMC1_2	GO:0005575(cellular_component:cellular_component); GO:0016021(cellular_component:integral component of membrane); GO:0110165(cellular_component:cellular anatomical entity); GO:0031224(cellular_component:intrinsic component of membrane)		ENOG4111UG0(S:Function unknown)	PF00173.29(Cyt-b5:Cytochrome b5-like Heme/Steroid binding domain)	Golgi apparatus	1	9	20.2	High
A0A165A3P8	2.97756	0.000525	up	yes	Adenylate kinase OS=Daucus carota subsp. sativus OX=79200 GN=DCAR_015774 PE=3 SV=1	K13800	CMPK1, UMPK	GO:0009165(biological_process:nucleotide biosynthetic process); GO:0019205(molecular_function:nucleobase-containing compound kinase activity); GO:0035639(molecular_function:purine ribonucleoside triphosphate binding); GO:1901363(molecular_function:heterocyclic compound binding); GO:0016776(molecular_function:phosphotransferase activity, phosphate group as acceptor); GO:0072528(biological_process:…	map00240(Pyrimidine metabolism)	COG0563(C:Energy production and conversion)	PF00406.23(ADK:Adenylate kinase); PF13207.7(AAA_17:AAA domain); PF13238.7(AAA_18:AAA domain)	chloroplast	4	39	20.1	High
A0A175YPL0	2.98525	0.0004	up	yes	Uncharacterized protein OS=Daucus carota subsp. sativus OX=79200 GN=DCAR_027039 PE=4 SV=1			GO:0038023(molecular_function:signaling receptor activity); GO:0031406(molecular_function:carboxylic acid binding); GO:0019208(molecular_function:phosphatase regulator activity); GO:0060089(molecular_function:molecular transducer activity); GO:0003674(molecular_function:molecular_function); GO:0007165(biological_process:signal transduction); GO:0004857(molecular_function:enzyme inhibitor activity…		ENOG410ZD18(S:Function unknown)		cytoplasmic	2	84	6.2	High
A0A164X280	2.99605	0.000105	up	yes	PARP catalytic domain-containing protein OS=Daucus carota subsp. sativus OX=79200 GN=DCAR_020039 PE=4 SV=1			GO:0003824(molecular_function:catalytic activity); GO:0016740(molecular_function:transferase activity); GO:0003674(molecular_function:molecular_function); GO:0016757(molecular_function:transferase activity, transferring glycosyl groups); GO:0016763(molecular_function:transferase activity, transferring pentosyl groups); GO:0003950(molecular_function:NAD+ ADP-ribosyltransferase activity)		ENOG4111NY1(S:Function unknown)		cytoplasmic	1	2	60.5	Medium
A0A164WSE6	2.98424	0.001541	up	yes	Uncharacterized protein OS=Daucus carota subsp. sativus OX=79200 GN=DCAR_020454 PE=4 SV=1	K20667	CYP716A	GO:0004497(molecular_function:monooxygenase activity); GO:0044249(biological_process:cellular biosynthetic process); GO:0003674(molecular_function:molecular_function); GO:0005488(molecular_function:binding); GO:1901363(molecular_function:heterocyclic compound binding); GO:1901360(biological_process:organic cyclic compound metabolic process); GO:0016491(molecular_function:oxidoreductase activity);…		COG2124(U:Intracellular trafficking, secretion, and vesicular transport)	PF00067.23(p450:Cytochrome P450)	ER	5	15	37.5	High
A0A166FRS9	2.70718	3.4e-05	up	yes	ATP-dependent 6-phosphofructokinase OS=Daucus carota subsp. sativus OX=79200 GN=PFK PE=3 SV=1	K00850	pfkA, PFK	GO:0019200(molecular_function:carbohydrate kinase activity); GO:0035639(molecular_function:purine ribonucleoside triphosphate binding); GO:0032553(molecular_function:ribonucleotide binding); GO:0003674(molecular_function:molecular_function); GO:0005488(molecular_function:binding); GO:0003872(molecular_function:6-phosphofructokinase activity); GO:0000166(molecular_function:nucleotide binding); GO:…	map03018(RNA degradation); map00010(Glycolysis / Gluconeogenesis); map00030(Pentose phosphate pathway); map00051(Fructose and mannose metabolism); map00052(Galactose metabolism)	COG0205(G:Carbohydrate transport and metabolism)	PF00365.21(PFK:Phosphofructokinase)	cytoplasmic	1	29	54.5	High
A0A161YBZ3	2.51497	0.000461	up	yes	Histone H2A OS=Daucus carota subsp. sativus OX=79200 GN=DCAR_022516 PE=3 SV=1	K11251	H2A	GO:0009892(biological_process:negative regulation of metabolic process); GO:0080090(biological_process:regulation of primary metabolic process); GO:0019222(biological_process:regulation of metabolic process); GO:0031327(biological_process:negative regulation of cellular biosynthetic process); GO:0031326(biological_process:regulation of cellular biosynthetic process); GO:0031324(biological_process…		COG5262(S:Function unknown)	PF16211.6(Histone_H2A_C:C-terminus of histone H2A); PF00125.25(Histone:Core histone H2A/H2B/H3/H4)	nuclear	1	19	14.1	High
A0A175YQ46	2.52166	0.03247	up	yes	mRNA cap-binding protein OS=Daucus carota subsp. sativus OX=79200 GN=DCAR_027340 PE=3 SV=1	K03259	EIF4E	GO:0005737(cellular_component:cytoplasm); GO:0090079(molecular_function:translation regulator activity, nucleic acid binding); GO:0032991(cellular_component:macromolecular complex); GO:0045182(molecular_function:translation regulator activity); GO:0000339(molecular_function:RNA cap binding); GO:0016281(cellular_component:eukaryotic translation initiation factor 4F complex); GO:0008135(molecular_f…	map03013(RNA transport)	COG5053(J:Translation, ribosomal structure and biogenesis)	PF01652.19(IF4E:Eukaryotic initiation factor 4E)	cytoplasmic	1	10	23.1	High
A0A164Z2Z5	2.81888	0.001421	up	yes	Uncharacterized protein OS=Daucus carota subsp. sativus OX=79200 GN=DCAR_018487 PE=3 SV=1			GO:0003674(molecular_function:molecular_function); GO:0045735(molecular_function:nutrient reservoir activity)		ENOG410YATH(S:Function unknown)	PF00190.23(Cupin_1:Cupin); PF07883.12(Cupin_2:Cupin domain)	ER	23	72	52.9	High
A0A161XYV1	2.85034	0.000146	up	yes	Fe2OG dioxygenase domain-containing protein OS=Daucus carota subsp. sativus OX=79200 GN=DCAR_010681 PE=3 SV=1	K05933	E1.14.17.4	GO:0043169(molecular_function:cation binding); GO:0051213(molecular_function:dioxygenase activity); GO:0016638(molecular_function:oxidoreductase activity, acting on the CH-NH2 group of donors); GO:0016641(molecular_function:oxidoreductase activity, acting on the CH-NH2 group of donors, oxygen as acceptor); GO:0009815(molecular_function:1-aminocyclopropane-1-carboxylate oxidase activity); GO:00431…	map00270(Cysteine and methionine metabolism)	COG3491(O:Posttranslational modification, protein turnover, chaperones)	PF03171.21(2OG-FeII_Oxy:2OG-Fe(II) oxygenase superfamily); PF14226.7(DIOX_N:non-haem dioxygenase in morphine synthesis N-terminal)	peroxisomal	5	26	32.4	High
A0A175YR74	2.94417	0.003713	up	yes	S-adenosylmethionine synthase OS=Daucus carota subsp. sativus OX=79200 GN=DCAR_026957 PE=3 SV=1	K00789	metK	GO:0035639(molecular_function:purine ribonucleoside triphosphate binding); GO:0006730(biological_process:one-carbon metabolic process); GO:0044249(biological_process:cellular biosynthetic process); GO:0003674(molecular_function:molecular_function); GO:0044281(biological_process:small molecule metabolic process); GO:0000166(molecular_function:nucleotide binding); GO:1901363(molecular_function:hete…	map00270(Cysteine and methionine metabolism)	COG0192(H:Coenzyme transport and metabolism)	PF02773.17(S-AdoMet_synt_C:S-adenosylmethionine synthetase, C-terminal domain); PF02772.17(S-AdoMet_synt_M:S-adenosylmethionine synthetase, central domain); PF00438.21(S-AdoMet_synt_N:S-adenosylmethionine synthetase, N-terminal domain)	cytoplasmic	6	74	42.7	High
A0A166C264	2.79923	5e-06	up	yes	Uncharacterized protein OS=Daucus carota subsp. sativus OX=79200 GN=DCAR_011944 PE=3 SV=1			GO:0004252(molecular_function:serine-type endopeptidase activity); GO:0004175(molecular_function:endopeptidase activity); GO:0005794(cellular_component:Golgi apparatus); GO:0043229(cellular_component:intracellular organelle); GO:0003674(molecular_function:molecular_function); GO:0008233(molecular_function:peptidase activity); GO:0043227(cellular_component:membrane-bounded organelle); GO:0043226(c…		COG1404(S:Function unknown)	PF00082.23(Peptidase_S8:Subtilase family); PF17766.2(fn3_6:Fibronectin type-III domain); PF05922.17(Inhibitor_I9:Peptidase inhibitor I9); PF02225.23(PA:PA domain)	Golgi apparatus	12	25	81.5	High
A0A166HYG7	2.75928	0.0008	up	yes	Uncharacterized protein OS=Daucus carota subsp. sativus OX=79200 GN=DCAR_003198 PE=4 SV=1			GO:0016787(molecular_function:hydrolase activity); GO:0003674(molecular_function:molecular_function); GO:0016788(molecular_function:hydrolase activity, acting on ester bonds); GO:0003824(molecular_function:catalytic activity)		ENOG410YED5(S:Function unknown)		cytoplasmic	1	9	11.2	Medium
A0A164UC46	3.09244	0.004807	up	yes	RING-type E3 ubiquitin transferase OS=Daucus carota subsp. sativus OX=79200 GN=DCAR_025771 PE=4 SV=1			GO:0019787(molecular_function:ubiquitin-like protein transferase activity); GO:0004842(molecular_function:ubiquitin-protein transferase activity); GO:0140096(molecular_function:catalytic activity, acting on a protein); GO:0003824(molecular_function:catalytic activity); GO:0016740(molecular_function:transferase activity); GO:0003674(molecular_function:molecular_function); GO:0016874(molecular_func…		ENOG410XU9Y(S:Function unknown)	PF00514.24(Arm:Armadillo/beta-catenin-like repeat); PF04564.16(U-box:U-box domain)	cytoplasmic	1	1	95.2	Medium
A0A166DSG6	2.90628	0.001217	up	yes	CP-type G domain-containing protein OS=Daucus carota subsp. sativus OX=79200 GN=DCAR_006456 PE=4 SV=1	K14539	LSG1	GO:0043168(molecular_function:anion binding); GO:0097367(molecular_function:carbohydrate derivative binding); GO:0000166(molecular_function:nucleotide binding); GO:0019001(molecular_function:guanyl nucleotide binding); GO:0035639(molecular_function:purine ribonucleoside triphosphate binding); GO:0097159(molecular_function:organic cyclic compound binding); GO:0043167(molecular_function:ion binding…	map03008(Ribosome biogenesis in eukaryotes)	COG1161(S:Function unknown)	PF01926.24(MMR_HSR1:50S ribosome-binding GTPase); PF02421.19(FeoB_N:Ferrous iron transport protein B)	nuclear	1	2	67	High
A0A166AG37	3.09317	0.002651	up	yes	DNA-directed RNA polymerase subunit beta OS=Daucus carota subsp. sativus OX=79200 GN=DCAR_009948 PE=3 SV=1	K16252	NRPD2, NRPE2	GO:0044238(biological_process:primary metabolic process); GO:0032774(biological_process:RNA biosynthetic process); GO:0030880(cellular_component:RNA polymerase complex); GO:0034062(molecular_function:RNA polymerase activity); GO:0008152(biological_process:metabolic process); GO:0044249(biological_process:cellular biosynthetic process); GO:0034641(biological_process:cellular nitrogen compound meta…		COG0085(E:Amino acid transport and metabolism)	PF00562.29(RNA_pol_Rpb2_6:RNA polymerase Rpb2, domain 6); PF04563.16(RNA_pol_Rpb2_1:RNA polymerase beta subunit); PF04560.21(RNA_pol_Rpb2_7:RNA polymerase Rpb2, domain 7); PF04566.14(RNA_pol_Rpb2_4:RNA polymerase Rpb2, domain 4); PF04565.17(RNA_pol_Rpb2_3:RNA polymerase Rpb2, domain 3); PF04561.15(RNA_pol_Rpb2_2:RNA polymerase Rpb2, domain 2); PF04567.18(RNA_pol_Rpb2_5:RNA polymerase Rpb2, domain…	nuclear	2	1	133.3	High
A0A175YFY1	2.87215	0.00274	up	yes	Ribosomal protein OS=Daucus carota subsp. sativus OX=79200 GN=DCAR_029704 PE=3 SV=1	K02863	RP-L1, MRPL1, rplA	GO:0044238(biological_process:primary metabolic process); GO:0015934(cellular_component:large ribosomal subunit); GO:0034645(biological_process:cellular macromolecule biosynthetic process); GO:0055035(cellular_component:plastid thylakoid membrane); GO:0034357(cellular_component:photosynthetic membrane); GO:0043603(biological_process:cellular amide metabolic process); GO:1901363(molecular_function…	map03010(Ribosome)	COG0081(P:Inorganic ion transport and metabolism)	PF00687.22(Ribosomal_L1:Ribosomal protein L1p/L10e family)	chloroplast	4	12	38.4	High
A0A166IBH9	3.10298	0.002535	up	yes	Uncharacterized protein OS=Daucus carota subsp. sativus OX=79200 GN=DCAR_003617 PE=4 SV=1			GO:0044238(biological_process:primary metabolic process); GO:0035770(cellular_component:ribonucleoprotein granule); GO:0008143(molecular_function:poly(A) binding); GO:0050896(biological_process:response to stimulus); GO:0034605(biological_process:cellular response to heat); GO:0006139(biological_process:nucleobase-containing compound metabolic process); GO:0090304(biological_process:nucleic acid …		COG0724(G:Carbohydrate transport and metabolism)	PF00076.23(RRM_1:RNA recognition motif. (a.k.a. RRM, RBD, or RNP domain))	nuclear	1	6	42.7	High
A0A165ZRD9	2.47756	0.000156	up	yes	HRDC domain-containing protein OS=Daucus carota subsp. sativus OX=79200 GN=DCAR_009083 PE=4 SV=1	K12591	RRP6, EXOSC10	GO:0090304(biological_process:nucleic acid metabolic process); GO:0034641(biological_process:cellular nitrogen compound metabolic process); GO:0006807(biological_process:nitrogen compound metabolic process); GO:0003674(molecular_function:molecular_function); GO:0005488(molecular_function:binding); GO:0003676(molecular_function:nucleic acid binding); GO:1905354(cellular_component:exoribonuclease c…	map03018(RNA degradation)	COG0349(J:Translation, ribosomal structure and biogenesis)	PF01612.21(DNA_pol_A_exo1:3'-5' exonuclease); PF00570.24(HRDC:HRDC domain)	nuclear	1	1	64.7	Medium
A0A164XEY6	2.87137	3.3e-05	up	yes	Uncharacterized protein OS=Daucus carota subsp. sativus OX=79200 GN=DCAR_016330 PE=3 SV=1	K08054	CANX	GO:0005488(molecular_function:binding); GO:0043169(molecular_function:cation binding); GO:0006457(biological_process:protein folding); GO:0005783(cellular_component:endoplasmic reticulum); GO:0016021(cellular_component:integral component of membrane); GO:0009987(biological_process:cellular process); GO:0051082(molecular_function:unfolded protein binding); GO:0043167(molecular_function:ion binding…	map04145(Phagosome); map04141(Protein processing in endoplasmic reticulum)	ENOG410XP7T(U:Intracellular trafficking, secretion, and vesicular transport)	PF00262.19(Calreticulin:Calreticulin family)	ER	9	26	45.9	High
A0A162A4P3	2.41281	0.01089	up	yes	Uncharacterized protein OS=Daucus carota subsp. sativus OX=79200 GN=DCAR_019404 PE=3 SV=1	K13065	E2.3.1.133, HCT	GO:0003824(molecular_function:catalytic activity); GO:0016740(molecular_function:transferase activity); GO:0016746(molecular_function:transferase activity, transferring acyl groups); GO:0016747(molecular_function:transferase activity, transferring acyl groups other than amino-acyl groups); GO:0003674(molecular_function:molecular_function)	map00941(Flavonoid biosynthesis); map00940(Phenylpropanoid biosynthesis); map00945(Stilbenoid, diarylheptanoid and gingerol biosynthesis)	ENOG410XNR7(S:Function unknown); ENOG410XPQ7(S:Function unknown)	PF02458.16(Transferase:Transferase family)	cytoplasmic	1	4	48.2	High
A0A164XHL4	2.80616	0.000636	up	yes	Inhibitor_I29 domain-containing protein OS=Daucus carota subsp. sativus OX=79200 GN=DCAR_016432 PE=4 SV=1	K16292	CEP, CYSEP	GO:0004175(molecular_function:endopeptidase activity); GO:0000323(cellular_component:lytic vacuole); GO:0043229(cellular_component:intracellular organelle); GO:0006807(biological_process:nitrogen compound metabolic process); GO:0003674(molecular_function:molecular_function); GO:0008233(molecular_function:peptidase activity); GO:0043227(cellular_component:membrane-bounded organelle); GO:0043226(ce…		COG4870(O:Posttranslational modification, protein turnover, chaperones)	PF08246.13(Inhibitor_I29:Cathepsin propeptide inhibitor domain (I29))	ER	3	16	17.9	High
A0A165AAW3	3.22157	0.009203	up	yes	ABC transporter domain-containing protein OS=Daucus carota subsp. sativus OX=79200 GN=DCAR_015421 PE=3 SV=1			GO:0035639(molecular_function:purine ribonucleoside triphosphate binding); GO:0003674(molecular_function:molecular_function); GO:0005488(molecular_function:binding); GO:0016887(molecular_function:ATPase activity); GO:0043167(molecular_function:ion binding); GO:1901363(molecular_function:heterocyclic compound binding); GO:0031224(cellular_component:intrinsic component of membrane); GO:0043168(mole…		COG0842(S:Function unknown)	PF01061.25(ABC2_membrane:ABC-2 type transporter); PF00005.28(ABC_tran:ABC transporter); PF08370.12(PDR_assoc:Plant PDR ABC transporter associated); PF13304.7(AAA_21:AAA domain, putative AbiEii toxin, Type IV TA system); PF14510.7(ABC_trans_N:ABC-transporter N-terminal); PF19055.1(ABC2_membrane_7:ABC-2 type transporter); PF13191.7(AAA_16:AAA ATPase domain); PF13671.7(AAA_33:AAA domain)	cytoplasmic	1	1	146.4	High
A0A164WHC8	2.7802	9.1e-05	up	yes	Uncharacterized protein OS=Daucus carota subsp. sativus OX=79200 GN=DCAR_020851 PE=4 SV=1	K03283	HSPA1s	GO:0043168(molecular_function:anion binding); GO:0097367(molecular_function:carbohydrate derivative binding); GO:0003674(molecular_function:molecular_function); GO:0030554(molecular_function:adenyl nucleotide binding); GO:0035639(molecular_function:purine ribonucleoside triphosphate binding); GO:0097159(molecular_function:organic cyclic compound binding); GO:0000166(molecular_function:nucleotide …	map04144(Endocytosis); map04141(Protein processing in endoplasmic reticulum); map03040(Spliceosome)	COG0443(H:Coenzyme transport and metabolism)		chloroplast	1	59	9.8	High
A0A165Y419	2.76482	0.00061	up	yes	V-type proton ATPase subunit a OS=Daucus carota subsp. sativus OX=79200 GN=DCAR_013844 PE=3 SV=1	K02154	ATPeV0A, ATP6N	GO:0022890(molecular_function:inorganic cation transmembrane transporter activity); GO:0098796(cellular_component:membrane protein complex); GO:0032991(cellular_component:macromolecular complex); GO:0033179(cellular_component:proton-transporting V-type ATPase, V0 domain); GO:0015318(molecular_function:inorganic solute uptake transmembrane transporter activity); GO:0005215(molecular_function:trans…	map04145(Phagosome); map00190(Oxidative phosphorylation)	COG1269(S:Function unknown)	PF01496.20(V_ATPase_I:V-type ATPase 116kDa subunit family)	cytoplasmic	1	3	93.5	High
A0A175YLF4	2.79154	4.7e-05	up	yes	Pectinesterase OS=Daucus carota subsp. sativus OX=79200 GN=DCAR_028163 PE=3 SV=1	K01051	E3.1.1.11	GO:0071704(biological_process:organic substance metabolic process); GO:0010393(biological_process:galacturonan metabolic process); GO:0003674(molecular_function:molecular_function); GO:0004857(molecular_function:enzyme inhibitor activity); GO:0098772(molecular_function:molecular function regulator); GO:0031224(cellular_component:intrinsic component of membrane); GO:0046910(molecular_function:pect…	map00040(Pentose and glucuronate interconversions)	COG4677(G:Carbohydrate transport and metabolism)	PF01095.20(Pectinesterase:Pectinesterase); PF04043.16(PMEI:Plant invertase/pectin methylesterase inhibitor)	ER	11	25	59.9	High
A0A164THF7	2.55841	0.000537	up	yes	Uncharacterized protein OS=Daucus carota subsp. sativus OX=79200 GN=DCAR_024662 PE=3 SV=1	K01634	SGPL1, DPL1	GO:0030170(molecular_function:pyridoxal phosphate binding); GO:0005783(cellular_component:endoplasmic reticulum); GO:1901363(molecular_function:heterocyclic compound binding); GO:0019752(biological_process:carboxylic acid metabolic process); GO:0070279(molecular_function:vitamin B6 binding); GO:0044248(biological_process:cellular catabolic process); GO:0043229(cellular_component:intracellular org…	map00600(Sphingolipid metabolism)	COG0076(S:Function unknown)	PF00282.20(Pyridoxal_deC:Pyridoxal-dependent decarboxylase conserved domain); PF00266.20(Aminotran_5:Aminotransferase class-V)	ER	1	3	59.1	High
A0A164VBU6	2.28521	0.001995	up	yes	AAI domain-containing protein OS=Daucus carota subsp. sativus OX=79200 GN=DCAR_022530 PE=3 SV=1			GO:0003674(molecular_function:molecular_function); GO:0045735(molecular_function:nutrient reservoir activity)			PF00234.23(Tryp_alpha_amyl:Protease inhibitor/seed storage/LTP family)	vacuolar	2	8	18.6	High
A0A161ZP21	2.62854	4.4e-05	up	yes	Pectinesterase OS=Daucus carota subsp. sativus OX=79200 GN=DCAR_025175 PE=3 SV=1	K01051	E3.1.1.11	GO:0071704(biological_process:organic substance metabolic process); GO:0010393(biological_process:galacturonan metabolic process); GO:0003674(molecular_function:molecular_function); GO:0004857(molecular_function:enzyme inhibitor activity); GO:0098772(molecular_function:molecular function regulator); GO:0031224(cellular_component:intrinsic component of membrane); GO:0046910(molecular_function:pect…	map00040(Pentose and glucuronate interconversions)	COG4677(I:Lipid transport and metabolism)	PF01095.20(Pectinesterase:Pectinesterase); PF04043.16(PMEI:Plant invertase/pectin methylesterase inhibitor)	Golgi apparatus	1	8	64.6	High
A0A175YC93	2.52422	0.004001	up	yes	Uncharacterized protein OS=Daucus carota subsp. sativus OX=79200 GN=DCAR_031607 PE=3 SV=1	K10523	SPOP			ENOG410XQV8(S:Function unknown)	PF00651.32(BTB:BTB/POZ domain)	cytoplasmic	1	2	44.1	Medium
A0A175YRQ3	2.34536	9.6e-05	up	yes	Bet_v_1 domain-containing protein OS=Daucus carota subsp. sativus OX=79200 GN=DCAR_027036 PE=4 SV=1			GO:0038023(molecular_function:signaling receptor activity); GO:0031406(molecular_function:carboxylic acid binding); GO:0019208(molecular_function:phosphatase regulator activity); GO:0060089(molecular_function:molecular transducer activity); GO:0003674(molecular_function:molecular_function); GO:0007165(biological_process:signal transduction); GO:0004857(molecular_function:enzyme inhibitor activity…		ENOG410ZD18(S:Function unknown)	PF00407.20(Bet_v_1:Pathogenesis-related protein Bet v 1 family)	cytoplasmic	1	23	7.3	High
A0A166BQC2	2.29955	0.00039	up	yes	C2 domain-containing protein OS=Daucus carota subsp. sativus OX=79200 GN=DCAR_011497 PE=4 SV=1					ENOG410ZTP2(S:Function unknown)	PF00514.24(Arm:Armadillo/beta-catenin-like repeat); PF00168.31(C2:C2 domain); PF13646.7(HEAT_2:HEAT repeats)	cytoplasmic	1	1	224.6	High
A0A164ZFG4	2.44131	0.000153	up	yes	Uncharacterized protein OS=Daucus carota subsp. sativus OX=79200 GN=DCAR_019096 PE=4 SV=1	K18677	GALAK	GO:0005488(molecular_function:binding); GO:0019200(molecular_function:carbohydrate kinase activity); GO:0005829(cellular_component:cytosol); GO:0035639(molecular_function:purine ribonucleoside triphosphate binding); GO:0030246(molecular_function:carbohydrate binding); GO:0019752(biological_process:carboxylic acid metabolic process); GO:0003674(molecular_function:molecular_function); GO:0044281(bi…	map00520(Amino sugar and nucleotide sugar metabolism)	COG0153(G:Carbohydrate transport and metabolism)	PF08544.14(GHMP_kinases_C:GHMP kinases C terminal); PF00288.27(GHMP_kinases_N:GHMP kinases N terminal domain)	cytoplasmic	1	2	47.8	High
A0A175YG00	2.82255	2.7e-05	up	yes	Uncharacterized protein OS=Daucus carota subsp. sativus OX=79200 GN=DCAR_029769 PE=4 SV=1			GO:0016791(molecular_function:phosphatase activity); GO:0035639(molecular_function:purine ribonucleoside triphosphate binding); GO:0042578(molecular_function:phosphoric ester hydrolase activity); GO:0003674(molecular_function:molecular_function); GO:0005488(molecular_function:binding); GO:0043167(molecular_function:ion binding); GO:1901363(molecular_function:heterocyclic compound binding); GO:003…		ENOG410YMK4(S:Function unknown); ENOG41114ZW(S:Function unknown)	PF05553.12(DUF761:Cotton fibre expressed protein)	ER	1	1	88.3	Medium
A0A161ZHR4	2.21159	0.000425	up	yes	Fes1 domain-containing protein OS=Daucus carota subsp. sativus OX=79200 GN=DCAR_023486 PE=4 SV=1	K09562	HSPBP1, FES1	GO:0005783(cellular_component:endoplasmic reticulum); GO:1901363(molecular_function:heterocyclic compound binding); GO:0043229(cellular_component:intracellular organelle); GO:0003674(molecular_function:molecular_function); GO:0005488(molecular_function:binding); GO:0060590(molecular_function:ATPase regulator activity); GO:0098772(molecular_function:molecular function regulator); GO:0043227(cellul…	map04141(Protein processing in endoplasmic reticulum)	ENOG410XSBC(S:Function unknown)	PF08609.11(Fes1:Nucleotide exchange factor Fes1)	ER	1	5	48.7	High
A0A166J5B8	2.48329	0.000771	up	yes	Protein cereblon OS=Daucus carota subsp. sativus OX=79200 GN=DCAR_004462 PE=3 SV=1	K11793	CRBN	GO:1990234(cellular_component:transferase complex); GO:0006807(biological_process:nitrogen compound metabolic process); GO:0003674(molecular_function:molecular_function); GO:0005488(molecular_function:binding); GO:0044267(biological_process:cellular protein metabolic process); GO:0044260(biological_process:cellular macromolecule metabolic process); GO:0032446(biological_process:protein modificati…		ENOG410XQGE(O:Posttranslational modification, protein turnover, chaperones)	PF02190.17(LON_substr_bdg:ATP-dependent protease La (LON) substrate-binding domain); PF03226.15(Yippee-Mis18:Yippee zinc-binding/DNA-binding /Mis18, centromere assembly)	cytoplasmic	1	2	59.8	Medium
A0A162AKB2	2.53405	0.000395	up	yes	Uncharacterized protein OS=Daucus carota subsp. sativus OX=79200 GN=DCAR_011097 PE=3 SV=1					ENOG410YQ6U(S:Function unknown)	PF02704.15(GASA:Gibberellin regulated protein)	extracellular	2	16	12.1	High
A0A166BT88	2.58853	4e-06	up	yes	Str_synth domain-containing protein OS=Daucus carota subsp. sativus OX=79200 GN=DCAR_011594 PE=3 SV=1			GO:0016844(molecular_function:strictosidine synthase activity); GO:0016840(molecular_function:carbon-nitrogen lyase activity); GO:0016843(molecular_function:amine-lyase activity); GO:0016829(molecular_function:lyase activity); GO:0003824(molecular_function:catalytic activity); GO:0009058(biological_process:biosynthetic process); GO:0003674(molecular_function:molecular_function); GO:0008152(biolog…		COG3386(G:Carbohydrate transport and metabolism)	PF03088.17(Str_synth:Strictosidine synthase); PF08450.13(SGL:SMP-30/Gluconolactonase/LRE-like region)	vacuolar	1	16	36.5	High
A0A164YWI9	2.42884	0.006225	up	yes	S-adenosylmethionine synthase OS=Daucus carota subsp. sativus OX=79200 GN=DCAR_018249 PE=3 SV=1	K00789	metK	GO:0035639(molecular_function:purine ribonucleoside triphosphate binding); GO:0006730(biological_process:one-carbon metabolic process); GO:0044249(biological_process:cellular biosynthetic process); GO:0003674(molecular_function:molecular_function); GO:0044281(biological_process:small molecule metabolic process); GO:0000166(molecular_function:nucleotide binding); GO:1901363(molecular_function:hete…	map00270(Cysteine and methionine metabolism)	COG0192(H:Coenzyme transport and metabolism)	PF02773.17(S-AdoMet_synt_C:S-adenosylmethionine synthetase, C-terminal domain); PF02772.17(S-AdoMet_synt_M:S-adenosylmethionine synthetase, central domain); PF00438.21(S-AdoMet_synt_N:S-adenosylmethionine synthetase, N-terminal domain)	cytoplasmic	2	47	42.9	High
A0A162A4R8	2.57822	7e-06	up	yes	Uncharacterized protein OS=Daucus carota subsp. sativus OX=79200 GN=DCAR_019434 PE=3 SV=1	K13126	PABPC	GO:0005737(cellular_component:cytoplasm); GO:0097159(molecular_function:organic cyclic compound binding); GO:0005575(cellular_component:cellular_component); GO:0003674(molecular_function:molecular_function); GO:0003723(molecular_function:RNA binding); GO:0003676(molecular_function:nucleic acid binding); GO:1901363(molecular_function:heterocyclic compound binding); GO:0110165(cellular_component:ce…	map03018(RNA degradation); map03013(RNA transport); map03015(mRNA surveillance pathway)	ENOG410XR5X(S:Function unknown)	PF00076.23(RRM_1:RNA recognition motif. (a.k.a. RRM, RBD, or RNP domain)); PF00658.19(PABP:Poly-adenylate binding protein, unique domain); PF16842.6(RRM_occluded:Occluded RNA-recognition motif)	chloroplast	3	23	62.7	High
A0A166EAB1	2.35821	0.00184	up	yes	Pectate lyase OS=Daucus carota subsp. sativus OX=79200 GN=DCAR_007134 PE=3 SV=1	K01728	pel	GO:0010393(biological_process:galacturonan metabolic process); GO:0003674(molecular_function:molecular_function); GO:0005488(molecular_function:binding); GO:0043169(molecular_function:cation binding); GO:1901575(biological_process:organic substance catabolic process); GO:0045488(biological_process:pectin metabolic process); GO:0016829(molecular_function:lyase activity); GO:0043167(molecular_funct…	map00040(Pentose and glucuronate interconversions)	COG3866(M:Cell wall/membrane/envelope biogenesis)	PF00544.20(Pectate_lyase_4:Pectate lyase); PF04431.14(Pec_lyase_N:Pectate lyase, N terminus)	extracellular	1	1	48.7	Medium
A0A166HZA5	2.62774	0.000541	up	yes	K-box domain-containing protein OS=Daucus carota subsp. sativus OX=79200 GN=DCAR_003230 PE=4 SV=1			GO:0080090(biological_process:regulation of primary metabolic process); GO:0019222(biological_process:regulation of metabolic process); GO:0031328(biological_process:positive regulation of cellular biosynthetic process); GO:0031326(biological_process:regulation of cellular biosynthetic process); GO:0031325(biological_process:positive regulation of cellular metabolic process); GO:0051173(biologica…		COG5068(K:Transcription)	PF01486.18(K-box:K-box region)	nuclear	1	3	27.9	Medium
A0A164U1T1	2.36569	0.000122	up	yes	Protein kinase domain-containing protein OS=Daucus carota subsp. sativus OX=79200 GN=DCAR_025393 PE=4 SV=1			GO:0080090(biological_process:regulation of primary metabolic process); GO:0019222(biological_process:regulation of metabolic process); GO:1901363(molecular_function:heterocyclic compound binding); GO:0010604(biological_process:positive regulation of macromolecule metabolic process); GO:0071704(biological_process:organic substance metabolic process); GO:0000166(molecular_function:nucleotide bindi…		ENOG410XPIR(S:Function unknown)	PF00069.26(Pkinase:Protein kinase domain); PF07714.18(PK_Tyr_Ser-Thr:Protein tyrosine and serine/threonine kinase)	nuclear	3	3	80.4	High
A0A161ZUA1	2.22262	0.03962	up	yes	Uncharacterized protein OS=Daucus carota subsp. sativus OX=79200 GN=DCAR_021123 PE=4 SV=1							extracellular	1	3	38.2	High
A0A164XE28	2.42211	0.001329	up	yes	40S ribosomal protein S12 OS=Daucus carota subsp. sativus OX=79200 GN=DCAR_016298 PE=3 SV=1	K02951	RP-S12e, RPS12	GO:0044238(biological_process:primary metabolic process); GO:0022627(cellular_component:cytosolic small ribosomal subunit); GO:0043232(cellular_component:intracellular non-membrane-bounded organelle); GO:0044249(biological_process:cellular biosynthetic process); GO:0034641(biological_process:cellular nitrogen compound metabolic process); GO:0006807(biological_process:nitrogen compound metabolic p…	map03010(Ribosome)	COG1358(J:Translation, ribosomal structure and biogenesis)	PF01248.27(Ribosomal_L7Ae:Ribosomal protein L7Ae/L30e/S12e/Gadd45 family)	cytoplasmic	2	39	32.7	High
A0A175YEJ1	2.53075	0.001054	up	yes	Uncharacterized protein OS=Daucus carota subsp. sativus OX=79200 GN=DCAR_029201 PE=4 SV=1			GO:0016758(molecular_function:transferase activity, transferring hexosyl groups); GO:0016740(molecular_function:transferase activity); GO:0003674(molecular_function:molecular_function); GO:0016757(molecular_function:transferase activity, transferring glycosyl groups); GO:0003824(molecular_function:catalytic activity)		COG1819(S:Function unknown)		cytoplasmic	1	7	19.9	High
A0A166EJJ1	2.58176	0.000365	up	yes	EF1_GNE domain-containing protein OS=Daucus carota subsp. sativus OX=79200 GN=DCAR_007484 PE=3 SV=1	K03232	EEF1B	GO:0005853(cellular_component:eukaryotic translation elongation factor 1 complex); GO:0090079(molecular_function:translation regulator activity, nucleic acid binding); GO:0032991(cellular_component:macromolecular complex); GO:0045182(molecular_function:translation regulator activity); GO:0008233(molecular_function:peptidase activity); GO:0016787(molecular_function:hydrolase activity); GO:0097159(…		COG2092(J:Translation, ribosomal structure and biogenesis)	PF00736.20(EF1_GNE:EF-1 guanine nucleotide exchange domain)	chloroplast	6	67	22.8	High
A0A161WZN4	2.48272	0.000316	up	yes	Endoglucanase OS=Daucus carota subsp. sativus OX=79200 GN=DCAR_005042 PE=3 SV=1	K01179	E3.2.1.4	GO:0016787(molecular_function:hydrolase activity); GO:0030243(biological_process:cellulose metabolic process); GO:0030246(molecular_function:carbohydrate binding); GO:0030245(biological_process:cellulose catabolic process); GO:0044248(biological_process:cellular catabolic process); GO:0003674(molecular_function:molecular_function); GO:0005488(molecular_function:binding); GO:0044247(biological_pro…	map00500(Starch and sucrose metabolism)	ENOG410XPC9(G:Carbohydrate transport and metabolism)	PF00759.20(Glyco_hydro_9:Glycosyl hydrolase family 9); PF09478.11(CBM49:Carbohydrate binding domain CBM49)	Golgi apparatus	1	2	68.8	Medium
A0A161ZXQ3	2.3145	0.000242	up	yes	Uncharacterized protein OS=Daucus carota subsp. sativus OX=79200 GN=DCAR_016277 PE=4 SV=1	K06268	PPP3R, CNB	GO:0043169(molecular_function:cation binding); GO:0043231(cellular_component:intracellular membrane-bounded organelle); GO:0005773(cellular_component:vacuole); GO:0043167(molecular_function:ion binding); GO:0005575(cellular_component:cellular_component); GO:0043229(cellular_component:intracellular organelle); GO:0003674(molecular_function:molecular_function); GO:0005509(molecular_function:calcium…		COG5126(E:Amino acid transport and metabolism)	PF13499.7(EF-hand_7:EF-hand domain pair); PF13405.7(EF-hand_6:EF-hand domain); PF00036.33(EF-hand_1:EF hand)	cytoplasmic	1	6	20.1	High
A0A164TNQ8	2.4068	0.002519	up	yes	Uncharacterized protein OS=Daucus carota subsp. sativus OX=79200 GN=DCAR_024878 PE=3 SV=1	K11153	RDH12			COG1028(S:Function unknown)	PF00106.26(adh_short:short chain dehydrogenase); PF13561.7(adh_short_C2:Enoyl-(Acyl carrier protein) reductase)	nuclear	1	14	34.2	High
A0A161YL48	1.95616	0.000414	up	yes	tRNA (adenine(58)-N(1))-methyltransferase non-catalytic subunit TRM6 OS=Daucus carota subsp. sativus OX=79200 GN=DCAR_017472 PE=3 SV=1	K03256	TRM6, GCD10	GO:1990234(cellular_component:transferase complex); GO:0043527(cellular_component:tRNA methyltransferase complex); GO:0009451(biological_process:RNA modification); GO:0090304(biological_process:nucleic acid metabolic process); GO:0034641(biological_process:cellular nitrogen compound metabolic process); GO:0006807(biological_process:nitrogen compound metabolic process); GO:0003674(molecular_functi…		ENOG410XSXD(S:Function unknown)	PF04189.14(Gcd10p:Gcd10p family)	nuclear	1	2	46.2	High
A0A165ZFX5	2.19799	0.000401	up	yes	4-coumarate--CoA ligase OS=Daucus carota subsp. sativus OX=79200 GN=DCAR_008744 PE=4 SV=1	K01897	ACSL, fadD	GO:0016878(molecular_function:acid-thiol ligase activity); GO:0102391(molecular_function:decanoate--CoA ligase activity); GO:0015645(molecular_function:fatty acid ligase activity); GO:0005575(cellular_component:cellular_component); GO:0031956(molecular_function:medium-chain fatty acid-CoA ligase activity); GO:0016405(molecular_function:CoA-ligase activity); GO:0003824(molecular_function:catalytic…	map04146(Peroxisome); map00061(Fatty acid biosynthesis); map00071(Fatty acid degradation)	COG1022(I:Lipid transport and metabolism)	PF00501.29(AMP-binding:AMP-binding enzyme)	Golgi apparatus	2	4	80.7	High
A0A162BA25	2.5083	0.000527	up	yes	ER membrane protein complex subunit 1 OS=Daucus carota subsp. sativus OX=79200 GN=DCAR_004489 PE=3 SV=1	K23562	EMC1	GO:0005794(cellular_component:Golgi apparatus); GO:0032991(cellular_component:macromolecular complex); GO:0043231(cellular_component:intracellular membrane-bounded organelle); GO:0098588(cellular_component:bounding membrane of organelle); GO:0016020(cellular_component:membrane); GO:0072546(cellular_component:ER membrane protein complex); GO:0005774(cellular_component:vacuolar membrane); GO:000557…		ENOG410XPCR(S:Function unknown)	PF07774.14(EMC1_C:ER membrane protein complex subunit 1, C-terminal); PF13360.7(PQQ_2:PQQ-like domain)	ER	10	11	120.4	High
A0A175YJX4	2.2521	0.000165	up	yes	Epimerase domain-containing protein OS=Daucus carota subsp. sativus OX=79200 GN=DCAR_030721 PE=4 SV=1			GO:0050662(molecular_function:coenzyme binding); GO:0016614(molecular_function:oxidoreductase activity, acting on CH-OH group of donors); GO:0016616(molecular_function:oxidoreductase activity, acting on the CH-OH group of donors, NAD or NADP as acceptor); GO:0003824(molecular_function:catalytic activity); GO:0003674(molecular_function:molecular_function); GO:0016491(molecular_function:oxidoreduct…		COG0451(S:Function unknown)	PF01370.22(Epimerase:NAD dependent epimerase/dehydratase family); PF01073.20(3Beta_HSD:3-beta hydroxysteroid dehydrogenase/isomerase family); PF16363.6(GDP_Man_Dehyd:GDP-mannose 4,6 dehydratase); PF13460.7(NAD_binding_10:NAD(P)H-binding); PF07993.13(NAD_binding_4:Male sterility protein); PF02719.16(Polysacc_synt_2:Polysaccharide biosynthesis protein); PF08659.11(KR:KR domain); PF05368.14(NmrA:Nmr…	peroxisomal	4	13	36.4	High
A0A164VBV8	2.12298	0.000676	up	yes	AAI domain-containing protein OS=Daucus carota subsp. sativus OX=79200 GN=DCAR_022529 PE=3 SV=1			GO:0003674(molecular_function:molecular_function); GO:0045735(molecular_function:nutrient reservoir activity)		ENOG41117DA(U:Intracellular trafficking, secretion, and vesicular transport)	PF00234.23(Tryp_alpha_amyl:Protease inhibitor/seed storage/LTP family)	vacuolar	10	43	18.2	High
A0A166E0R0	2.4165	0.000204	up	yes	RmlD_sub_bind domain-containing protein OS=Daucus carota subsp. sativus OX=79200 GN=DCAR_006768 PE=4 SV=1	K12451	UER1	GO:0044249(biological_process:cellular biosynthetic process); GO:0034641(biological_process:cellular nitrogen compound metabolic process); GO:0006807(biological_process:nitrogen compound metabolic process); GO:0003674(molecular_function:molecular_function); GO:0044281(biological_process:small molecule metabolic process); GO:1901362(biological_process:organic cyclic compound biosynthetic process);…	map00520(Amino sugar and nucleotide sugar metabolism); map00523(Polyketide sugar unit biosynthesis)	COG1088(J:Translation, ribosomal structure and biogenesis)	PF04321.18(RmlD_sub_bind:RmlD substrate binding domain); PF01370.22(Epimerase:NAD dependent epimerase/dehydratase family); PF16363.6(GDP_Man_Dehyd:GDP-mannose 4,6 dehydratase)	peroxisomal	5	36	33.3	High
A0A161ZP48	2.59919	0.001585	up	yes	Uncharacterized protein OS=Daucus carota subsp. sativus OX=79200 GN=DCAR_025215 PE=4 SV=1	K17427	MRPL46	GO:0016787(molecular_function:hydrolase activity); GO:0015934(cellular_component:large ribosomal subunit); GO:0005840(cellular_component:ribosome); GO:0043232(cellular_component:intracellular non-membrane-bounded organelle); GO:1990904(cellular_component:ribonucleoprotein complex); GO:0000315(cellular_component:organellar large ribosomal subunit); GO:0140096(molecular_function:catalytic activity,…		ENOG4111HSF(S:Function unknown)		cytoplasmic	1	6	27.1	High
A0A161WUZ7	2.30857	0.000808	up	yes	Uncharacterized protein OS=Daucus carota subsp. sativus OX=79200 GN=DCAR_011299 PE=3 SV=1	K13065	E2.3.1.133, HCT	GO:0003824(molecular_function:catalytic activity); GO:0016740(molecular_function:transferase activity); GO:0016746(molecular_function:transferase activity, transferring acyl groups); GO:0016747(molecular_function:transferase activity, transferring acyl groups other than amino-acyl groups); GO:0003674(molecular_function:molecular_function)	map00941(Flavonoid biosynthesis); map00940(Phenylpropanoid biosynthesis); map00945(Stilbenoid, diarylheptanoid and gingerol biosynthesis)	ENOG41113XM(S:Function unknown)	PF02458.16(Transferase:Transferase family)	cytoplasmic	1	3	48	Medium
A0A164V9M1	2.38499	0.0001	up	yes	O-fucosyltransferase family protein OS=Daucus carota subsp. sativus OX=79200 GN=DCAR_022624 PE=3 SV=1			GO:0044238(biological_process:primary metabolic process); GO:0003674(molecular_function:molecular_function); GO:0005975(biological_process:carbohydrate metabolic process); GO:0016757(molecular_function:transferase activity, transferring glycosyl groups); GO:0003824(molecular_function:catalytic activity); GO:0005996(biological_process:monosaccharide metabolic process); GO:0019318(biological_proces…		ENOG410YDRR(S:Function unknown)	PF10250.10(O-FucT:GDP-fucose protein O-fucosyltransferase)	cytoplasmic	3	8	42.9	High
A0A165ZN68	1.64356	0.02769	up	yes	Peroxidase OS=Daucus carota subsp. sativus OX=79200 GN=DCAR_008989 PE=3 SV=1	K00430	E1.11.1.7	GO:0044248(biological_process:cellular catabolic process); GO:0042744(biological_process:hydrogen peroxide catabolic process); GO:0003674(molecular_function:molecular_function); GO:0005488(molecular_function:binding); GO:1901363(molecular_function:heterocyclic compound binding); GO:0016491(molecular_function:oxidoreductase activity); GO:0043169(molecular_function:cation binding); GO:0043167(molec…	map00940(Phenylpropanoid biosynthesis)	ENOG410YDTD(G:Carbohydrate transport and metabolism)	PF00141.24(peroxidase:Peroxidase)	cytoplasmic	1	2	31.1	Medium
A0A164VXY0	2.48234	2.9e-05	up	yes	Peptidase_M3 domain-containing protein OS=Daucus carota subsp. sativus OX=79200 GN=DCAR_021620 PE=3 SV=1	K01414	prlC	GO:0004175(molecular_function:endopeptidase activity); GO:0034641(biological_process:cellular nitrogen compound metabolic process); GO:0006807(biological_process:nitrogen compound metabolic process); GO:0003674(molecular_function:molecular_function); GO:0005488(molecular_function:binding); GO:0008233(molecular_function:peptidase activity); GO:0043227(cellular_component:membrane-bounded organelle)…		COG0339(E:Amino acid transport and metabolism)	PF01432.21(Peptidase_M3:Peptidase family M3)	cytoplasmic	1	20	78.6	High
A0A164UEG9	2.2307	0.000191	up	yes	Uncharacterized protein OS=Daucus carota subsp. sativus OX=79200 GN=DCAR_025856 PE=3 SV=1	K01739	metB	GO:0044237(biological_process:cellular metabolic process); GO:0019752(biological_process:carboxylic acid metabolic process); GO:0070279(molecular_function:vitamin B6 binding); GO:0006807(biological_process:nitrogen compound metabolic process); GO:0003674(molecular_function:molecular_function); GO:0030170(molecular_function:pyridoxal phosphate binding); GO:0009069(biological_process:serine family …	map00450(Selenocompound metabolism); map00920(Sulfur metabolism); map00270(Cysteine and methionine metabolism)	COG0626(E:Amino acid transport and metabolism)	PF01053.21(Cys_Met_Meta_PP:Cys/Met metabolism PLP-dependent enzyme)	chloroplast	8	16	55.2	High
A0A164YE52	2.43487	3.2e-05	up	yes	Pyrophosphate--fructose 6-phosphate 1-phosphotransferase subunit alpha OS=Daucus carota subsp. sativus OX=79200 GN=PFP-ALPHA PE=3 SV=1	K00895	pfp, PFP	GO:0019200(molecular_function:carbohydrate kinase activity); GO:0035639(molecular_function:purine ribonucleoside triphosphate binding); GO:0003674(molecular_function:molecular_function); GO:0005488(molecular_function:binding); GO:0003872(molecular_function:6-phosphofructokinase activity); GO:0000166(molecular_function:nucleotide binding); GO:1901363(molecular_function:heterocyclic compound bindin…	map00010(Glycolysis / Gluconeogenesis); map00030(Pentose phosphate pathway); map00051(Fructose and mannose metabolism)	COG0205(G:Carbohydrate transport and metabolism)	PF00365.21(PFK:Phosphofructokinase)	cytoplasmic	12	59	66.7	High
A0A175YD81	2.4643	0.000836	up	yes	Uncharacterized protein OS=Daucus carota subsp. sativus OX=79200 GN=DCAR_029026 PE=4 SV=1			GO:0097159(molecular_function:organic cyclic compound binding); GO:0003674(molecular_function:molecular_function); GO:0005488(molecular_function:binding); GO:0003676(molecular_function:nucleic acid binding); GO:1901363(molecular_function:heterocyclic compound binding); GO:0003723(molecular_function:RNA binding)		COG0724(G:Carbohydrate transport and metabolism)	PF00076.23(RRM_1:RNA recognition motif. (a.k.a. RRM, RBD, or RNP domain))	chloroplast	4	18	29.5	High
A0A175YBH8	2.35172	0.000833	up	yes	Elongation factor G, mitochondrial OS=Daucus carota subsp. sativus OX=79200 GN=DCAR_031877 PE=3 SV=1	K02355	fusA, GFM, EFG	GO:0008152(biological_process:metabolic process); GO:0035639(molecular_function:purine ribonucleoside triphosphate binding); GO:0110165(cellular_component:cellular anatomical entity); GO:0044249(biological_process:cellular biosynthetic process); GO:0043229(cellular_component:intracellular organelle); GO:0003674(molecular_function:molecular_function); GO:0005488(molecular_function:binding); GO:003…		COG0480(J:Translation, ribosomal structure and biogenesis)	PF00009.28(GTP_EFTU:Elongation factor Tu GTP binding domain); PF03764.19(EFG_IV:Elongation factor G, domain IV); PF14492.7(EFG_III:Elongation Factor G, domain III); PF03144.26(GTP_EFTU_D2:Elongation factor Tu domain 2); PF00679.25(EFG_C:Elongation factor G C-terminus)	mitochondrial	11	19	80.5	High
A0A164UV56	2.16604	0.001659	up	yes	Alpha-galactosidase OS=Daucus carota subsp. sativus OX=79200 GN=DCAR_023233 PE=3 SV=1	K07407	E3.2.1.22B, galA, rafA	GO:0071704(biological_process:organic substance metabolic process); GO:0016787(molecular_function:hydrolase activity); GO:0052692(molecular_function:raffinose alpha-galactosidase activity); GO:0005975(biological_process:carbohydrate metabolic process); GO:0044238(biological_process:primary metabolic process); GO:0005618(cellular_component:cell wall); GO:0016021(cellular_component:integral compone…	map00600(Sphingolipid metabolism); map00603(Glycosphingolipid biosynthesis - globo and isoglobo series); map00561(Glycerolipid metabolism); map00052(Galactose metabolism)	ENOG410XPF1(E:Amino acid transport and metabolism)	PF16499.6(Melibiase_2:Alpha galactosidase A); PF17801.2(Melibiase_C:Alpha galactosidase C-terminal beta sandwich domain); PF02065.19(Melibiase:Melibiase)	cytoplasmic	9	27	44.5	High
A0A161WSB6	2.15033	0.03763	up	yes	UBC core domain-containing protein OS=Daucus carota subsp. sativus OX=79200 GN=DCAR_010319 PE=4 SV=1	K10704	UBE2V	GO:0008152(biological_process:metabolic process); GO:0043412(biological_process:macromolecule modification); GO:0090304(biological_process:nucleic acid metabolic process); GO:0043229(cellular_component:intracellular organelle); GO:0006807(biological_process:nitrogen compound metabolic process); GO:0003674(molecular_function:molecular_function); GO:0043227(cellular_component:membrane-bounded organ…		ENOG4111MDW(O:Posttranslational modification, protein turnover, chaperones)	PF00179.27(UQ_con:Ubiquitin-conjugating enzyme)	nuclear	1	18	17.2	High
A0A164VUG6	2.3114	1.7e-05	up	yes	Uncharacterized protein OS=Daucus carota subsp. sativus OX=79200 GN=DCAR_021764 PE=3 SV=1	K01188;qsu	E3.2.1.21;	GO:0071704(biological_process:organic substance metabolic process); GO:0016787(molecular_function:hydrolase activity); GO:0005975(biological_process:carbohydrate metabolic process); GO:0015926(molecular_function:glucosidase activity); GO:0044238(biological_process:primary metabolic process); GO:0016798(molecular_function:hydrolase activity, acting on glycosyl bonds); GO:0008422(molecular_function…	map00460(Cyanoamino acid metabolism); map00940(Phenylpropanoid biosynthesis); map00500(Starch and sucrose metabolism)	COG2723(F:Nucleotide transport and metabolism)	PF00232.19(Glyco_hydro_1:Glycosyl hydrolase family 1)	vacuolar	26	64	61.6	High
A0A161WX01	2.19505	0.001792	up	yes	Uncharacterized protein OS=Daucus carota subsp. sativus OX=79200 GN=DCAR_011991 PE=3 SV=1			GO:0030234(molecular_function:enzyme regulator activity); GO:0030414(molecular_function:peptidase inhibitor activity); GO:0050896(biological_process:response to stimulus); GO:0061134(molecular_function:peptidase regulator activity); GO:0009611(biological_process:response to wounding); GO:0006950(biological_process:response to stress); GO:0008150(biological_process:biological_process); GO:0004866(…		ENOG410Z25M(S:Function unknown)	PF00280.19(potato_inhibit:Potato inhibitor I family)	cytoplasmic	3	61	9.5	High
A0A166B347	2.23938	0.000187	up	yes	UDP-glucose 6-dehydrogenase OS=Daucus carota subsp. sativus OX=79200 GN=DCAR_011048 PE=3 SV=1	K00012	UGDH, ugd	GO:0030203(biological_process:glycosaminoglycan metabolic process); GO:0051287(molecular_function:NAD binding); GO:1901363(molecular_function:heterocyclic compound binding); GO:0043229(cellular_component:intracellular organelle); GO:0006807(biological_process:nitrogen compound metabolic process); GO:0003674(molecular_function:molecular_function); GO:0005488(molecular_function:binding); GO:0003979…	map00520(Amino sugar and nucleotide sugar metabolism); map00040(Pentose and glucuronate interconversions); map00053(Ascorbate and aldarate metabolism)	COG1004(M:Cell wall/membrane/envelope biogenesis)	PF03721.15(UDPG_MGDP_dh_N:UDP-glucose/GDP-mannose dehydrogenase family, NAD binding domain); PF03720.16(UDPG_MGDP_dh_C:UDP-glucose/GDP-mannose dehydrogenase family, UDP binding domain); PF00984.20(UDPG_MGDP_dh:UDP-glucose/GDP-mannose dehydrogenase family, central domain)	cytoplasmic	13	58	51.4	High
A0A161ZPR8	2.2713	0.001608	up	yes	Uncharacterized protein OS=Daucus carota subsp. sativus OX=79200 GN=DCAR_025475 PE=4 SV=1					ENOG411248W(S:Function unknown)	PF04862.13(DUF642:Protein of unknown function (DUF642))	vacuolar	6	27	41.4	High
A0A164Z7I2	2.31151	9e-06	up	yes	CBM20 domain-containing protein OS=Daucus carota subsp. sativus OX=79200 GN=DCAR_018710 PE=4 SV=1			GO:0016787(molecular_function:hydrolase activity); GO:0016772(molecular_function:transferase activity, transferring phosphorus-containing groups); GO:0016301(molecular_function:kinase activity); GO:0030247(molecular_function:polysaccharide binding); GO:0030246(molecular_function:carbohydrate binding); GO:0003824(molecular_function:catalytic activity); GO:0016740(molecular_function:transferase act…		ENOG410ZU6N(S:Function unknown); ENOG41128GG(S:Function unknown)	PF00686.20(CBM_20:Starch binding domain)	cytoplasmic	3	10	36.3	High
A0A162A2M7	2.32967	0.000998	up	yes	Uncharacterized protein OS=Daucus carota subsp. sativus OX=79200 GN=DCAR_018484 PE=3 SV=1			GO:0003674(molecular_function:molecular_function); GO:0045735(molecular_function:nutrient reservoir activity)		ENOG410YATH(S:Function unknown)	PF00190.23(Cupin_1:Cupin); PF03079.15(ARD:ARD/ARD' family); PF07883.12(Cupin_2:Cupin domain)	ER	24	77	50.9	High
A0A164X4J7	2.35722	0.003759	up	yes	4-hydroxy-4-methyl-2-oxoglutarate aldolase OS=Daucus carota subsp. sativus OX=79200 GN=DCAR_019939 PE=3 SV=1			GO:0080090(biological_process:regulation of primary metabolic process); GO:0019222(biological_process:regulation of metabolic process); GO:0008948(molecular_function:oxaloacetate decarboxylase activity); GO:0031323(biological_process:regulation of cellular metabolic process); GO:0003674(molecular_function:molecular_function); GO:0005488(molecular_function:binding); GO:0004857(molecular_function:e…		COG0684(G:Carbohydrate transport and metabolism)	PF03737.16(RraA-like:Aldolase/RraA)	cytoplasmic	1	10	18.4	High
A0A165YY55	2.29167	4.4e-05	up	yes	HATPase_c domain-containing protein OS=Daucus carota subsp. sativus OX=79200 GN=DCAR_013257 PE=3 SV=1	K04079	HSP90A, htpG	GO:0006457(biological_process:protein folding); GO:0035639(molecular_function:purine ribonucleoside triphosphate binding); GO:0003674(molecular_function:molecular_function); GO:0005488(molecular_function:binding); GO:0043167(molecular_function:ion binding); GO:1901363(molecular_function:heterocyclic compound binding); GO:1901265(molecular_function:nucleoside phosphate binding); GO:0043168(molecul…	map04626(Plant-pathogen interaction); map04141(Protein processing in endoplasmic reticulum)	COG0326(O:Posttranslational modification, protein turnover, chaperones)	PF00183.19(HSP90:Hsp90 protein); PF02518.27(HATPase_c:Histidine kinase-, DNA gyrase B-, and HSP90-like ATPase); PF13589.7(HATPase_c_3:Histidine kinase-, DNA gyrase B-, and HSP90-like ATPase)	nuclear	8	50	80.7	High
A0A164UPD8	2.21104	0.001854	up	yes	Uncharacterized protein OS=Daucus carota subsp. sativus OX=79200 GN=DCAR_026246 PE=4 SV=1	K17592	SACS			ENOG4111N59(S:Function unknown)		plasma membrane	1	1	185.2	Medium
A0A164WKS2	2.36928	0.000185	up	yes	UBC core domain-containing protein OS=Daucus carota subsp. sativus OX=79200 GN=DCAR_020724 PE=4 SV=1	K10704	UBE2V	GO:0043231(cellular_component:intracellular membrane-bounded organelle); GO:0016796(molecular_function:exonuclease activity, active with either ribo- or deoxyribonucleic acids and producing 5'-phosphomonoesters); GO:0061650(molecular_function:ubiquitin-like protein conjugating enzyme activity); GO:0043412(biological_process:macromolecule modification); GO:1901363(molecular_function:heterocyclic c…		ENOG4111MDW(O:Posttranslational modification, protein turnover, chaperones)	PF00179.27(UQ_con:Ubiquitin-conjugating enzyme)	nuclear	1	35	18.9	High
A0A166CNZ2	2.20736	0.005155	up	yes	Uncharacterized protein OS=Daucus carota subsp. sativus OX=79200 GN=DCAR_004995 PE=4 SV=1	K15042	KPNA5_6	GO:0034504(biological_process:protein localization to nucleus); GO:0051169(biological_process:nuclear transport); GO:0008104(biological_process:protein localization); GO:0042025(cellular_component:host cell nucleus); GO:0140142(molecular_function:nucleocytoplasmic carrier activity); GO:0061608(molecular_function:nuclear import signal receptor activity); GO:0015833(biological_process:peptide trans…		COG5064(U:Intracellular trafficking, secretion, and vesicular transport)	PF00514.24(Arm:Armadillo/beta-catenin-like repeat); PF13513.7(HEAT_EZ:HEAT-like repeat); PF02985.23(HEAT:HEAT repeat); PF13646.7(HEAT_2:HEAT repeats)	cytoplasmic	1	3	38.2	Medium
A0A165XX62	2.37347	0.003173	up	yes	UDP-glycosyltransferase OS=Daucus carota subsp. sativus OX=79200 GN=DCAR_014014 PE=3 SV=1			GO:0016758(molecular_function:transferase activity, transferring hexosyl groups); GO:0016740(molecular_function:transferase activity); GO:0003674(molecular_function:molecular_function); GO:0016757(molecular_function:transferase activity, transferring glycosyl groups); GO:0003824(molecular_function:catalytic activity)		COG1819(E:Amino acid transport and metabolism)	PF00201.19(UDPGT:UDP-glucoronosyl and UDP-glucosyl transferase)	cytoplasmic	1	4	96	High
A0A166CEK0	2.32793	5.3e-05	up	yes	F-box domain-containing protein OS=Daucus carota subsp. sativus OX=79200 GN=DCAR_012425 PE=4 SV=1	K14485	TIR1		map04075(Plant hormone signal transduction)	ENOG410XQ54(P:Inorganic ion transport and metabolism)	PF18791.2(Transp_inhibit:Transport inhibitor response 1 protein domain); PF18511.2(F-box_5:F-box)	cytoplasmic	2	3	65.6	High
A0A164UZR1	2.21366	6.7e-05	up	yes	Uncharacterized protein OS=Daucus carota subsp. sativus OX=79200 GN=DCAR_023030 PE=3 SV=1	K01373	CTSF	GO:0016787(molecular_function:hydrolase activity); GO:0140096(molecular_function:catalytic activity, acting on a protein); GO:0003824(molecular_function:catalytic activity); GO:0070011(molecular_function:peptidase activity, acting on L-amino acid peptides); GO:0003674(molecular_function:molecular_function); GO:0008233(molecular_function:peptidase activity); GO:0008234(molecular_function:cysteine-…	map04626(Plant-pathogen interaction)	COG4870(E:Amino acid transport and metabolism)	PF00112.24(Peptidase_C1:Papain family cysteine protease); PF08246.13(Inhibitor_I29:Cathepsin propeptide inhibitor domain (I29))	ER	6	22	38.9	High
A0A161ZJQ2	2.3006	1.2e-05	up	yes	Uncharacterized protein OS=Daucus carota subsp. sativus OX=79200 GN=DCAR_024376 PE=4 SV=1					ENOG410Z7Z7(S:Function unknown)	PF13041.7(PPR_2:PPR repeat family); PF12854.8(PPR_1:PPR repeat); PF01535.21(PPR:PPR repeat); PF13812.7(PPR_3:Pentatricopeptide repeat domain); PF17177.5(PPR_long:Pentacotripeptide-repeat region of PRORP)	mitochondrial	2	5	64.3	High
A0A161XCZ2	1.85665	0.006322	up	yes	4-Hydroxy-3-methylbut-2-enyl diphosphate reductase OS=Daucus carota subsp. sativus OX=79200 GN=HDR-2 PE=3 SV=1	K03527	ispH, lytB	GO:0019752(biological_process:carboxylic acid metabolic process); GO:0044249(biological_process:cellular biosynthetic process); GO:0019288(biological_process:isopentenyl diphosphate biosynthetic process, methylerythritol 4-phosphate pathway); GO:0046490(biological_process:isopentenyl diphosphate metabolic process); GO:0003674(molecular_function:molecular_function); GO:0005488(molecular_function:b…	map00900(Terpenoid backbone biosynthesis)	COG0761(I:Lipid transport and metabolism)	PF02401.19(LYTB:LytB protein)	cytoplasmic	2	4	51.2	High
A0A162AAL8	2.26839	0.01063	up	yes	Expansin-like CBD domain-containing protein OS=Daucus carota subsp. sativus OX=79200 GN=DCAR_014628 PE=4 SV=1			GO:0044703(biological_process:multi-organism reproductive process); GO:0000003(biological_process:reproduction); GO:0016021(cellular_component:integral component of membrane); GO:0019953(biological_process:sexual reproduction); GO:0005575(cellular_component:cellular_component); GO:0022414(biological_process:reproductive process); GO:0005576(cellular_component:extracellular region); GO:0008150(bio…			PF01357.22(Expansin_C:Expansin C-terminal domain)	cytoplasmic	1	11	13.5	High
A0A165WDQ1	2.22835	0.00182	up	yes	WD_REPEATS_REGION domain-containing protein OS=Daucus carota subsp. sativus OX=79200 GN=DCAR_015254 PE=4 SV=1	K14554	UTP21, WDR36	GO:0032040(cellular_component:small-subunit processome); GO:0030684(cellular_component:preribosome); GO:0090304(biological_process:nucleic acid metabolic process); GO:0034641(biological_process:cellular nitrogen compound metabolic process); GO:0006807(biological_process:nitrogen compound metabolic process); GO:0034660(biological_process:ncRNA metabolic process); GO:1901360(biological_process:orga…	map03008(Ribosome biogenesis in eukaryotes)	ENOG410XPJH(S:Function unknown)	PF04192.13(Utp21:Utp21 specific WD40 associated putative domain); PF00400.33(WD40:WD domain, G-beta repeat); PF12894.8(ANAPC4_WD40:Anaphase-promoting complex subunit 4 WD40 domain)	nuclear	1	1	101.9	Medium
A0A164WYU9	2.10227	6.6e-05	up	yes	Uncharacterized protein OS=Daucus carota subsp. sativus OX=79200 GN=DCAR_020174 PE=4 SV=1			GO:0016787(molecular_function:hydrolase activity); GO:0016791(molecular_function:phosphatase activity); GO:0016788(molecular_function:hydrolase activity, acting on ester bonds); GO:0042578(molecular_function:phosphoric ester hydrolase activity); GO:0003824(molecular_function:catalytic activity); GO:0003674(molecular_function:molecular_function); GO:0003993(molecular_function:acid phosphatase acti…		ENOG410YBHH(S:Function unknown)	PF03767.15(Acid_phosphat_B:HAD superfamily, subfamily IIIB (Acid phosphatase))	extracellular	4	17	30.3	High
A0A164XLJ1	2.15511	8.5e-05	up	yes	Fucosyltransferase OS=Daucus carota subsp. sativus OX=79200 GN=DCAR_016572 PE=3 SV=1	K13681	FUT	GO:0008107(molecular_function:galactoside 2-alpha-L-fucosyltransferase activity); GO:0016020(cellular_component:membrane); GO:0071555(biological_process:cell wall organization); GO:0044249(biological_process:cellular biosynthetic process); GO:0043229(cellular_component:intracellular organelle); GO:0003674(molecular_function:molecular_function); GO:0044237(biological_process:cellular metabolic pro…		ENOG410XXHE(O:Posttranslational modification, protein turnover, chaperones)	PF03254.14(XG_FTase:Xyloglucan fucosyltransferase)	cytoplasmic	1	2	63.3	High
A0A175YIG0	2.33606	9e-06	up	yes	Pyrophosphate--fructose 6-phosphate 1-phosphotransferase subunit beta OS=Daucus carota subsp. sativus OX=79200 GN=PFP-BETA PE=3 SV=1	K00895	pfp, PFP	GO:0019200(molecular_function:carbohydrate kinase activity); GO:0006002(biological_process:fructose 6-phosphate metabolic process); GO:0035639(molecular_function:purine ribonucleoside triphosphate binding); GO:0003674(molecular_function:molecular_function); GO:0005488(molecular_function:binding); GO:0003872(molecular_function:6-phosphofructokinase activity); GO:0043167(molecular_function:ion bind…	map00010(Glycolysis / Gluconeogenesis); map00030(Pentose phosphate pathway); map00051(Fructose and mannose metabolism)	COG0205(I:Lipid transport and metabolism)	PF00365.21(PFK:Phosphofructokinase)	cytoplasmic	21	54	56.3	High
A0A164YEZ6	2.06103	0.000255	up	yes	ANK_REP_REGION domain-containing protein OS=Daucus carota subsp. sativus OX=79200 GN=DCAR_017666 PE=4 SV=1			GO:0009896(biological_process:positive regulation of catabolic process); GO:0009894(biological_process:regulation of catabolic process); GO:0009893(biological_process:positive regulation of metabolic process); GO:0019222(biological_process:regulation of metabolic process); GO:0035639(molecular_function:purine ribonucleoside triphosphate binding); GO:0070647(biological_process:protein modification…		COG0666(S:Function unknown)	PF00023.31(Ank:Ankyrin repeat); PF12796.8(Ank_2:Ankyrin repeats (3 copies)); PF13857.7(Ank_5:Ankyrin repeats (many copies)); PF13637.7(Ank_4:Ankyrin repeats (many copies)); PF13606.7(Ank_3:Ankyrin repeat)	cytoplasmic	3	22	19.7	High
A0A164VAE2	2.2592	7.6e-05	up	yes	Uncharacterized protein OS=Daucus carota subsp. sativus OX=79200 GN=DCAR_022589 PE=3 SV=1	K16732	PRC1	GO:0006996(biological_process:organelle organization); GO:0015631(molecular_function:tubulin binding); GO:0007017(biological_process:microtubule-based process); GO:0007010(biological_process:cytoskeleton organization); GO:0008092(molecular_function:cytoskeletal protein binding); GO:0008017(molecular_function:microtubule binding); GO:0009987(biological_process:cellular process); GO:0016043(biologi…		ENOG410YZBK(S:Function unknown)	PF03999.13(MAP65_ASE1:Microtubule associated protein (MAP65/ASE1 family)); PF06839.13(zf-GRF:GRF zinc finger)	cytoplasmic	2	4	80.6	High
A0A175YRB5	1.99447	0.000589	up	yes	Uncharacterized protein OS=Daucus carota subsp. sativus OX=79200 GN=DCAR_026555 PE=3 SV=1			GO:0005575(cellular_component:cellular_component); GO:0016021(cellular_component:integral component of membrane); GO:0110165(cellular_component:cellular anatomical entity); GO:0031224(cellular_component:intrinsic component of membrane)			PF02704.15(GASA:Gibberellin regulated protein)	extracellular	2	50	10.9	High
A0A161X1J0	2.18646	1e-06	up	yes	TCTP domain-containing protein OS=Daucus carota subsp. sativus OX=79200 GN=DCAR_023287 PE=3 SV=1					ENOG4111FVP(K:Transcription)	PF00838.18(TCTP:Translationally controlled tumour protein)	chloroplast	6	56	18.9	High
A0A166FNR1	2.14591	5.7e-05	up	yes	Uncharacterized protein OS=Daucus carota subsp. sativus OX=79200 GN=DCAR_000664 PE=3 SV=1	K10739	RFA2, RPA2	GO:0003676(molecular_function:nucleic acid binding); GO:0090304(biological_process:nucleic acid metabolic process); GO:0044249(biological_process:cellular biosynthetic process); GO:0034641(biological_process:cellular nitrogen compound metabolic process); GO:0006807(biological_process:nitrogen compound metabolic process); GO:0003674(molecular_function:molecular_function); GO:0005488(molecular_func…	map03430(Mismatch repair); map03440(Homologous recombination); map03420(Nucleotide excision repair); map03030(DNA replication)	COG5235(L:Replication, recombination and repair)	PF08784.12(RPA_C:Replication protein A C terminal); PF01336.26(tRNA_anti-codon:OB-fold nucleic acid binding domain)	nuclear	1	6	33.4	High
A0A164WI16	2.19782	0.000103	up	yes	Uncharacterized protein OS=Daucus carota subsp. sativus OX=79200 GN=DCAR_020824 PE=4 SV=1	K13525	VCP, CDC48	GO:0035639(molecular_function:purine ribonucleoside triphosphate binding); GO:0003674(molecular_function:molecular_function); GO:0005488(molecular_function:binding); GO:0043167(molecular_function:ion binding); GO:1901363(molecular_function:heterocyclic compound binding); GO:1901265(molecular_function:nucleoside phosphate binding); GO:0043168(molecular_function:anion binding); GO:0000166(molecular…	map04141(Protein processing in endoplasmic reticulum)	COG0464(L:Replication, recombination and repair)	PF00004.30(AAA:ATPase family associated with various cellular activities (AAA)); PF17862.2(AAA_lid_3:AAA+ lid domain); PF02359.19(CDC48_N:Cell division protein 48 (CDC48), N-terminal domain); PF05496.13(RuvB_N:Holliday junction DNA helicase RuvB P-loop domain); PF07724.15(AAA_2:AAA domain (Cdc48 subfamily)); PF02933.18(CDC48_2:Cell division protein 48 (CDC48), domain 2); PF13191.7(AAA_16:AAA ATPa…	cytoplasmic	3	47	89.3	High
A0A175YJI6	1.97698	0.000541	up	yes	Uncharacterized protein OS=Daucus carota subsp. sativus OX=79200 GN=DCAR_030890 PE=4 SV=1	K14012	SHP1, UBX1, NSFL1C	GO:0022607(biological_process:cellular component assembly); GO:0032182(molecular_function:ubiquitin-like protein binding); GO:0044248(biological_process:cellular catabolic process); GO:0061024(biological_process:membrane organization); GO:0043229(cellular_component:intracellular organelle); GO:0006807(biological_process:nitrogen compound metabolic process); GO:0003674(molecular_function:molecular…	map04141(Protein processing in endoplasmic reticulum)	ENOG410YGXU(S:Function unknown)	PF08059.14(SEP:SEP domain); PF00789.21(UBX:UBX domain)	nuclear	2	13	27.3	High
A0A164WTP4	2.20099	1e-06	up	yes	Uncharacterized protein OS=Daucus carota subsp. sativus OX=79200 GN=DCAR_020401 PE=3 SV=1	K15425	PPP4R2	GO:0048856(biological_process:anatomical structure development); GO:0019219(biological_process:regulation of nucleobase-containing compound metabolic process); GO:0080090(biological_process:regulation of primary metabolic process); GO:0019222(biological_process:regulation of metabolic process); GO:0016311(biological_process:dephosphorylation); GO:0006470(biological_process:protein dephosphorylati…		ENOG4110IV7(T:Signal transduction mechanisms)		cytoplasmic	1	4	25.8	High
A0A164V6K6	2.26295	0.002547	up	yes	Uncharacterized protein OS=Daucus carota subsp. sativus OX=79200 GN=DCAR_022749 PE=3 SV=1	K05917	CYP51	GO:0004497(molecular_function:monooxygenase activity); GO:0016020(cellular_component:membrane); GO:0005783(cellular_component:endoplasmic reticulum); GO:0043229(cellular_component:intracellular organelle); GO:0003674(molecular_function:molecular_function); GO:0005488(molecular_function:binding); GO:0008168(molecular_function:methyltransferase activity); GO:0043167(molecular_function:ion binding);…	map00100(Steroid biosynthesis)	COG2124(S:Function unknown)	PF00067.23(p450:Cytochrome P450)	ER	2	3	53.4	High
A0A161Y5Q6	2.15122	4.1e-05	up	yes	Uncharacterized protein OS=Daucus carota subsp. sativus OX=79200 GN=DCAR_005514 PE=4 SV=1					ENOG41123CA(K:Transcription)	PF06101.12(Vps62:Vacuolar protein sorting-associated protein 62)	cytoplasmic	1	1	62.4	Medium
A0A164ZPA9	2.20119	0.000528	up	yes	BHLH domain-containing protein OS=Daucus carota subsp. sativus OX=79200 GN=DCAR_019446 PE=4 SV=1			GO:0005515(molecular_function:protein binding); GO:0097159(molecular_function:organic cyclic compound binding); GO:0003674(molecular_function:molecular_function); GO:0005488(molecular_function:binding); GO:0003676(molecular_function:nucleic acid binding); GO:0003677(molecular_function:DNA binding); GO:0046983(molecular_function:protein dimerization activity); GO:1901363(molecular_function:heteroc…		ENOG410YJCH(K:Transcription)	PF00010.27(HLH:Helix-loop-helix DNA-binding domain)	nuclear	1	3	28.4	Medium
A0A169WC89	2.19109	2.4e-05	up	yes	Uncharacterized protein OS=Daucus carota subsp. sativus OX=79200 GN=DCAR_010668 PE=3 SV=1	K14563	NOP1, FBL	GO:0090304(biological_process:nucleic acid metabolic process); GO:0034641(biological_process:cellular nitrogen compound metabolic process); GO:0006807(biological_process:nitrogen compound metabolic process); GO:0003674(molecular_function:molecular_function); GO:0005488(molecular_function:binding); GO:0003676(molecular_function:nucleic acid binding); GO:0008168(molecular_function:methyltransferase…	map03008(Ribosome biogenesis in eukaryotes)	COG1889(J:Translation, ribosomal structure and biogenesis)	PF01269.18(Fibrillarin:Fibrillarin)	nuclear	10	35	25	High
A0A166F0I9	2.06768	9e-05	up	yes	Uncharacterized protein OS=Daucus carota subsp. sativus OX=79200 GN=DCAR_008035 PE=4 SV=1					ENOG410ZDC2(S:Function unknown)	PF01190.18(Pollen_Ole_e_1:Pollen protein Ole e 1 like)	extracellular	1	2	38.9	High
A0A175YBL3	1.92273	0.000639	up	yes	Protein kinase domain-containing protein OS=Daucus carota subsp. sativus OX=79200 GN=DCAR_031386 PE=4 SV=1			GO:0035639(molecular_function:purine ribonucleoside triphosphate binding); GO:0003674(molecular_function:molecular_function); GO:0005488(molecular_function:binding); GO:0043167(molecular_function:ion binding); GO:1901363(molecular_function:heterocyclic compound binding); GO:0031224(cellular_component:intrinsic component of membrane); GO:0043168(molecular_function:anion binding); GO:0016021(cellul…		COG0515(T:Signal transduction mechanisms)	PF07714.18(PK_Tyr_Ser-Thr:Protein tyrosine and serine/threonine kinase); PF00069.26(Pkinase:Protein kinase domain)	ER	1	6	23.8	Medium
A0A164Z2U8	2.18254	0.000308	up	yes	Uncharacterized protein OS=Daucus carota subsp. sativus OX=79200 GN=DCAR_018483 PE=3 SV=1			GO:0003674(molecular_function:molecular_function); GO:0045735(molecular_function:nutrient reservoir activity)		ENOG410YATH(S:Function unknown)	PF00190.23(Cupin_1:Cupin)	vacuolar	27	78	50.8	High
A0A164XLB1	2.18191	8.3e-05	up	yes	Uncharacterized protein OS=Daucus carota subsp. sativus OX=79200 GN=DCAR_016563 PE=4 SV=1			GO:0005575(cellular_component:cellular_component); GO:0016021(cellular_component:integral component of membrane); GO:0110165(cellular_component:cellular anatomical entity); GO:0031224(cellular_component:intrinsic component of membrane)		ENOG411208S(S:Function unknown)	PF11523.9(DUF3223:Protein of unknown function (DUF3223))	nuclear	5	28	22.8	High
A0A175YLM7	2.20241	0.000669	up	yes	Sucrose synthase OS=Daucus carota subsp. sativus OX=79200 GN=DCAR_028527 PE=3 SV=1	K00695	E2.4.1.13	GO:0044238(biological_process:primary metabolic process); GO:0016157(molecular_function:sucrose synthase activity); GO:0008152(biological_process:metabolic process); GO:0071704(biological_process:organic substance metabolic process); GO:0009311(biological_process:oligosaccharide metabolic process); GO:0035251(molecular_function:UDP-glucosyltransferase activity); GO:0009987(biological_process:cell…	map00500(Starch and sucrose metabolism)	COG0438(J:Translation, ribosomal structure and biogenesis)	PF00862.20(Sucrose_synth:Sucrose synthase); PF00534.21(Glycos_transf_1:Glycosyl transferases group 1); PF13692.7(Glyco_trans_1_4:Glycosyl transferases group 1)	cytoplasmic	17	47	91.2	High
A0A166GG37	2.18028	0.00186	up	yes	RRM domain-containing protein OS=Daucus carota subsp. sativus OX=79200 GN=DCAR_001576 PE=4 SV=1			GO:0051169(biological_process:nuclear transport); GO:0051168(biological_process:nuclear export); GO:0010043(biological_process:response to zinc ion); GO:1901363(molecular_function:heterocyclic compound binding); GO:1901360(biological_process:organic cyclic compound metabolic process); GO:0043207(biological_process:response to external biotic stimulus); GO:0005777(cellular_component:peroxisome); G…		COG0724(S:Function unknown); ENOG4111GI6(K:Transcription); ENOG41121QZ(K:Transcription)	PF00076.23(RRM_1:RNA recognition motif. (a.k.a. RRM, RBD, or RNP domain))	nuclear	3	41	15.7	High
A0A162A2E2	2.18663	2.7e-05	up	yes	Beta-galactosidase OS=Daucus carota subsp. sativus OX=79200 GN=DCAR_017325 PE=3 SV=1			GO:0030246(molecular_function:carbohydrate binding); GO:0043229(cellular_component:intracellular organelle); GO:0003674(molecular_function:molecular_function); GO:0005488(molecular_function:binding); GO:0043227(cellular_component:membrane-bounded organelle); GO:0043226(cellular_component:organelle); GO:0031224(cellular_component:intrinsic component of membrane); GO:0005618(cellular_component:cell…		COG1874(G:Carbohydrate transport and metabolism)	PF01301.20(Glyco_hydro_35:Glycosyl hydrolases family 35); PF17834.2(GHD:Beta-sandwich domain in beta galactosidase); PF02140.19(Gal_Lectin:Galactose binding lectin domain); PF02449.16(Glyco_hydro_42:Beta-galactosidase)	extracellular	4	10	94.2	High
A0A175YEI6	2.13878	0.002947	up	yes	Peptidase A1 domain-containing protein OS=Daucus carota subsp. sativus OX=79200 GN=DCAR_029430 PE=4 SV=1			GO:0004175(molecular_function:endopeptidase activity); GO:0006807(biological_process:nitrogen compound metabolic process); GO:0003674(molecular_function:molecular_function); GO:0008233(molecular_function:peptidase activity); GO:1901575(biological_process:organic substance catabolic process); GO:0070001(molecular_function:aspartic-type peptidase activity); GO:0071704(biological_process:organic sub…		ENOG410XNV7(G:Carbohydrate transport and metabolism)	PF14541.7(TAXi_C:Xylanase inhibitor C-terminal); PF14543.7(TAXi_N:Xylanase inhibitor N-terminal)	vacuolar	11	34	46.5	High
A0A165XA46	2.18966	0.008868	up	yes	Peptidyl-prolyl cis-trans isomerase OS=Daucus carota subsp. sativus OX=79200 GN=DCAR_014670 PE=3 SV=1	K01802	E5.2.1.8	GO:0006457(biological_process:protein folding); GO:0008144(molecular_function:drug binding); GO:0043229(cellular_component:intracellular organelle); GO:0003674(molecular_function:molecular_function); GO:0005488(molecular_function:binding); GO:0043227(cellular_component:membrane-bounded organelle); GO:0043226(cellular_component:organelle); GO:0009536(cellular_component:plastid); GO:0042277(molecul…		COG0652(K:Transcription)	PF00160.22(Pro_isomerase:Cyclophilin type peptidyl-prolyl cis-trans isomerase/CLD)	chloroplast	6	69	18.2	High
A0A165Z711	2.17365	0.00028	up	yes	Isocitrate lyase OS=Daucus carota subsp. sativus OX=79200 GN=DCAR_012950 PE=3 SV=1	K01637	E4.1.3.1, aceA	GO:0019752(biological_process:carboxylic acid metabolic process); GO:0042579(cellular_component:microbody); GO:0043229(cellular_component:intracellular organelle); GO:0003674(molecular_function:molecular_function); GO:0005488(molecular_function:binding); GO:0009514(cellular_component:glyoxysome); GO:0043227(cellular_component:membrane-bounded organelle); GO:0043226(cellular_component:organelle); …	map00630(Glyoxylate and dicarboxylate metabolism)	COG2224(C:Energy production and conversion)	PF00463.22(ICL:Isocitrate lyase family); PF13714.7(PEP_mutase:Phosphoenolpyruvate phosphomutase)	chloroplast	13	44	64.9	High
A0A161ZRJ3	1.88869	0.003565	up	yes	Endoglucanase OS=Daucus carota subsp. sativus OX=79200 GN=DCAR_022313 PE=3 SV=1	K01179	E3.2.1.4	GO:0030243(biological_process:cellulose metabolic process); GO:0016798(molecular_function:hydrolase activity, acting on glycosyl bonds); GO:0030245(biological_process:cellulose catabolic process); GO:0044248(biological_process:cellular catabolic process); GO:0003674(molecular_function:molecular_function); GO:0009251(biological_process:glucan catabolic process); GO:0044042(biological_process:gluca…	map00500(Starch and sucrose metabolism)	ENOG410XP0H(U:Intracellular trafficking, secretion, and vesicular transport)	PF00759.20(Glyco_hydro_9:Glycosyl hydrolase family 9)	Golgi apparatus	1	2	68.2	Medium
A0A175YN01	1.97181	0.0163	up	yes	RING-type domain-containing protein OS=Daucus carota subsp. sativus OX=79200 GN=DCAR_027735 PE=4 SV=1			GO:0043169(molecular_function:cation binding); GO:0046872(molecular_function:metal ion binding); GO:0003674(molecular_function:molecular_function); GO:0005488(molecular_function:binding); GO:0043167(molecular_function:ion binding)		ENOG410Y7MJ(S:Function unknown)		cytoplasmic	1	1	133.1	Medium
A0A175YKY6	2.14656	6e-06	up	yes	Uncharacterized protein OS=Daucus carota subsp. sativus OX=79200 GN=DCAR_028551 PE=3 SV=1	K15296	NAPA, SNAPA, SEC17	GO:0071705(biological_process:nitrogen compound transport); GO:0042886(biological_process:amide transport); GO:0008104(biological_process:protein localization); GO:0046907(biological_process:intracellular transport); GO:0033036(biological_process:macromolecule localization); GO:0006886(biological_process:intracellular protein transport); GO:0006810(biological_process:transport); GO:0045184(biolog…		ENOG410XPQ6(U:Intracellular trafficking, secretion, and vesicular transport)	PF14938.7(SNAP:Soluble NSF attachment protein, SNAP)	cytoplasmic	1	47	20.3	High
A0A165XFF0	1.90507	0.009956	up	yes	S10_plectin domain-containing protein OS=Daucus carota subsp. sativus OX=79200 GN=DCAR_014521 PE=4 SV=1	K02947	RP-S10e, RPS10	GO:0005840(cellular_component:ribosome); GO:0043232(cellular_component:intracellular non-membrane-bounded organelle); GO:0005575(cellular_component:cellular_component); GO:0043229(cellular_component:intracellular organelle); GO:0043228(cellular_component:non-membrane-bounded organelle); GO:0043226(cellular_component:organelle); GO:0110165(cellular_component:cellular anatomical entity)	map03010(Ribosome)		PF03501.16(S10_plectin:Plectin/S10 domain)	cytoplasmic	1	43	19.6	High
A0A166FNP5	1.86025	0.000123	up	yes	THUMP domain-containing protein OS=Daucus carota subsp. sativus OX=79200 GN=DCAR_000660 PE=4 SV=1	K06963	TAN1, THUMPD1	GO:0009451(biological_process:RNA modification); GO:0090304(biological_process:nucleic acid metabolic process); GO:0034641(biological_process:cellular nitrogen compound metabolic process); GO:0006807(biological_process:nitrogen compound metabolic process); GO:0003674(molecular_function:molecular_function); GO:0005488(molecular_function:binding); GO:0003676(molecular_function:nucleic acid binding)…			PF02926.18(THUMP:THUMP domain)	nuclear	1	4	46.7	High
A0A175YQJ8	2.11992	0.001099	up	yes	CCT-eta OS=Daucus carota subsp. sativus OX=79200 GN=DCAR_027486 PE=3 SV=1	K09499	CCT7	GO:0006457(biological_process:protein folding); GO:0035639(molecular_function:purine ribonucleoside triphosphate binding); GO:0007165(biological_process:signal transduction); GO:0050789(biological_process:regulation of biological process); GO:0003674(molecular_function:molecular_function); GO:0051082(molecular_function:unfolded protein binding); GO:0043167(molecular_function:ion binding); GO:1901…		COG0459(S:Function unknown)	PF00118.25(Cpn60_TCP1:TCP-1/cpn60 chaperonin family)	chloroplast	2	52	60.2	High
A0A165XXS6	2.01344	0.008269	up	yes	WD_REPEATS_REGION domain-containing protein OS=Daucus carota subsp. sativus OX=79200 GN=DCAR_013994 PE=3 SV=1	K10752	RBBP4, HAT2, CAF1, MIS16	GO:0043231(cellular_component:intracellular membrane-bounded organelle); GO:0005634(cellular_component:nucleus); GO:0005575(cellular_component:cellular_component); GO:0043229(cellular_component:intracellular organelle); GO:0043227(cellular_component:membrane-bounded organelle); GO:0043226(cellular_component:organelle); GO:0110165(cellular_component:cellular anatomical entity)		ENOG410XNU9(S:Function unknown)	PF12265.9(CAF1C_H4-bd:Histone-binding protein RBBP4 or subunit C of CAF1 complex); PF00400.33(WD40:WD domain, G-beta repeat)	nuclear	1	4	46.9	High
A0A164U276	2.08974	2.4e-05	up	yes	UDP-glucose 6-dehydrogenase OS=Daucus carota subsp. sativus OX=79200 GN=DCAR_025416 PE=3 SV=1	K00012	UGDH, ugd	GO:0110165(cellular_component:cellular anatomical entity); GO:0016614(molecular_function:oxidoreductase activity, acting on CH-OH group of donors); GO:0005575(cellular_component:cellular_component); GO:0016616(molecular_function:oxidoreductase activity, acting on the CH-OH group of donors, NAD or NADP as acceptor); GO:0051287(molecular_function:NAD binding); GO:0016021(cellular_component:integral…	map00520(Amino sugar and nucleotide sugar metabolism); map00040(Pentose and glucuronate interconversions); map00053(Ascorbate and aldarate metabolism)	COG1004(S:Function unknown)	PF03721.15(UDPG_MGDP_dh_N:UDP-glucose/GDP-mannose dehydrogenase family, NAD binding domain); PF03720.16(UDPG_MGDP_dh_C:UDP-glucose/GDP-mannose dehydrogenase family, UDP binding domain); PF00984.20(UDPG_MGDP_dh:UDP-glucose/GDP-mannose dehydrogenase family, central domain)	cytoplasmic	13	61	52.9	High
A0A161X2Q0	1.91985	0.000112	up	yes	Carboxypeptidase OS=Daucus carota subsp. sativus OX=79200 GN=DCAR_006112 PE=3 SV=1	K16298	SCPL-IV	GO:0008238(molecular_function:exopeptidase activity); GO:0043229(cellular_component:intracellular organelle); GO:0006807(biological_process:nitrogen compound metabolic process); GO:0003674(molecular_function:molecular_function); GO:0008233(molecular_function:peptidase activity); GO:0043227(cellular_component:membrane-bounded organelle); GO:0043226(cellular_component:organelle); GO:0008236(molecul…		COG2939(J:Translation, ribosomal structure and biogenesis)	PF00450.23(Peptidase_S10:Serine carboxypeptidase)	vacuolar	13	34	56.6	High
A0A166J425	2.00576	0.000411	up	yes	Uncharacterized protein OS=Daucus carota subsp. sativus OX=79200 GN=DCAR_004432 PE=3 SV=1	K14496	PYL	GO:0038023(molecular_function:signaling receptor activity); GO:0080090(biological_process:regulation of primary metabolic process); GO:0019222(biological_process:regulation of metabolic process); GO:0010921(biological_process:regulation of phosphatase activity); GO:0019208(molecular_function:phosphatase regulator activity); GO:0031323(biological_process:regulation of cellular metabolic process); …	map04016(MAPK signaling pathway - plant); map04075(Plant hormone signal transduction)	ENOG410YE0A(S:Function unknown)	PF10604.10(Polyketide_cyc2:Polyketide cyclase / dehydrase and lipid transport); PF00407.20(Bet_v_1:Pathogenesis-related protein Bet v 1 family)	cytoplasmic	2	16	21	High
A0A165XZ49	2.18515	0.000109	up	yes	Pyrophosphate--fructose 6-phosphate 1-phosphotransferase subunit alpha OS=Daucus carota subsp. sativus OX=79200 GN=PFP-ALPHA PE=3 SV=1	K00895	pfp, PFP	GO:0043168(molecular_function:anion binding); GO:0019200(molecular_function:carbohydrate kinase activity); GO:0035639(molecular_function:purine ribonucleoside triphosphate binding); GO:1901363(molecular_function:heterocyclic compound binding); GO:0003674(molecular_function:molecular_function); GO:0005488(molecular_function:binding); GO:0003872(molecular_function:6-phosphofructokinase activity); G…	map00010(Glycolysis / Gluconeogenesis); map00030(Pentose phosphate pathway); map00051(Fructose and mannose metabolism)	COG0205(G:Carbohydrate transport and metabolism)	PF00365.21(PFK:Phosphofructokinase)	cytoplasmic	3	39	66.8	High
A0A175Y933	2.05762	0.000165	up	yes	3-oxoacyl-[acyl-carrier-protein] synthase OS=Daucus carota subsp. sativus OX=79200 GN=DCAR_000462 PE=3 SV=1	K09458	fabF, OXSM, CEM1	GO:0006633(biological_process:fatty acid biosynthetic process); GO:0006631(biological_process:fatty acid metabolic process); GO:0019752(biological_process:carboxylic acid metabolic process); GO:0044249(biological_process:cellular biosynthetic process); GO:0043229(cellular_component:intracellular organelle); GO:0003674(molecular_function:molecular_function); GO:0044281(biological_process:small mol…	map00780(Biotin metabolism); map00061(Fatty acid biosynthesis)	COG0304(I:Lipid transport and metabolism)	PF00109.27(ketoacyl-synt:Beta-ketoacyl synthase, N-terminal domain); PF02801.23(Ketoacyl-synt_C:Beta-ketoacyl synthase, C-terminal domain)	chloroplast	9	25	48.9	High
A0A175YQC3	2.09613	0.000146	up	yes	Bet_v_1 domain-containing protein OS=Daucus carota subsp. sativus OX=79200 GN=DCAR_027031 PE=4 SV=1			GO:0005488(molecular_function:binding); GO:0009617(biological_process:response to bacterium); GO:0038023(molecular_function:signaling receptor activity); GO:0004864(molecular_function:protein phosphatase inhibitor activity); GO:0031406(molecular_function:carboxylic acid binding); GO:0019208(molecular_function:phosphatase regulator activity); GO:0060089(molecular_function:molecular transducer acti…		ENOG410ZD18(S:Function unknown)	PF00407.20(Bet_v_1:Pathogenesis-related protein Bet v 1 family)	cytoplasmic	5	62	14.4	High
A0A164UJE5	2.18674	3.1e-05	up	yes	Eukaryotic translation initiation factor 5A OS=Daucus carota subsp. sativus OX=79200 GN=DCAR_026031 PE=3 SV=1	K03263	EIF5A	GO:0034250(biological_process:positive regulation of cellular amide metabolic process); GO:0045905(biological_process:positive regulation of translational termination); GO:0080090(biological_process:regulation of primary metabolic process); GO:0019222(biological_process:regulation of metabolic process); GO:0031328(biological_process:positive regulation of cellular biosynthetic process); GO:200011…		COG0231(G:Carbohydrate transport and metabolism)	PF01287.21(eIF-5a:Eukaryotic elongation factor 5A hypusine, DNA-binding OB fold)	cytoplasmic	3	67	17.1	High
A0A161ZSE0	2.1289	0.00053	up	yes	Uncharacterized protein OS=Daucus carota subsp. sativus OX=79200 GN=DCAR_023147 PE=3 SV=1	K14487	GH3		map04075(Plant hormone signal transduction)	ENOG410XT6V(S:Function unknown)	PF03321.14(GH3:GH3 auxin-responsive promoter)	cytoplasmic	27	51	69.8	High
A0A166HWZ2	1.95913	5.2e-05	up	yes	Nop domain-containing protein OS=Daucus carota subsp. sativus OX=79200 GN=DCAR_003150 PE=3 SV=1	K14565	NOP58	GO:0032040(cellular_component:small-subunit processome); GO:0032991(cellular_component:macromolecular complex); GO:0005732(cellular_component:small nucleolar ribonucleoprotein complex); GO:0097159(molecular_function:organic cyclic compound binding); GO:1990904(cellular_component:ribonucleoprotein complex); GO:0030684(cellular_component:preribosome); GO:0005575(cellular_component:cellular_componen…	map03008(Ribosome biogenesis in eukaryotes)	COG1498(J:Translation, ribosomal structure and biogenesis)	PF01798.19(Nop:snoRNA binding domain, fibrillarin); PF08156.14(NOP5NT:NOP5NT (NUC127) domain)	nuclear	1	23	62.7	High
A0A165YRJ5	2.06699	4.4e-05	up	yes	5-methyltetrahydropteroyltriglutamate--homocysteine S-methyltransferase OS=Daucus carota subsp. sativus OX=79200 GN=DCAR_013479 PE=3 SV=1	K00549	metE	GO:0005488(molecular_function:binding); GO:0043169(molecular_function:cation binding); GO:0019752(biological_process:carboxylic acid metabolic process); GO:0044249(biological_process:cellular biosynthetic process); GO:0006807(biological_process:nitrogen compound metabolic process); GO:0009067(biological_process:aspartate family amino acid biosynthetic process); GO:0044281(biological_process:small…	map00450(Selenocompound metabolism); map00270(Cysteine and methionine metabolism)	COG0620(E:Amino acid transport and metabolism)	PF01717.19(Meth_synt_2:Cobalamin-independent synthase, Catalytic domain); PF08267.13(Meth_synt_1:Cobalamin-independent synthase, N-terminal domain)	cytoplasmic	13	60	67.6	High
A0A175YDR7	2.05	0.001625	up	yes	Knot1 domain-containing protein OS=Daucus carota subsp. sativus OX=79200 GN=DCAR_028974 PE=4 SV=1			GO:0005575(cellular_component:cellular_component); GO:0050896(biological_process:response to stimulus); GO:0006952(biological_process:defense response); GO:0006950(biological_process:response to stress); GO:0005576(cellular_component:extracellular region); GO:0008150(biological_process:biological_process); GO:0110165(cellular_component:cellular anatomical entity)		ENOG4111DG5(S:Function unknown)	PF00304.21(Gamma-thionin:Gamma-thionin family)	extracellular	2	26	8.9	High
A0A166FI93	2.07441	0.00124	up	yes	Uncharacterized protein OS=Daucus carota subsp. sativus OX=79200 GN=DCAR_008648 PE=3 SV=1			GO:0016787(molecular_function:hydrolase activity); GO:0016021(cellular_component:integral component of membrane); GO:0016788(molecular_function:hydrolase activity, acting on ester bonds); GO:0005575(cellular_component:cellular_component); GO:0003824(molecular_function:catalytic activity); GO:0003674(molecular_function:molecular_function); GO:0031224(cellular_component:intrinsic component of membr…		ENOG410Y9BR(Q:Secondary metabolites biosynthesis, transport and catabolism)	PF00657.23(Lipase_GDSL:GDSL-like Lipase/Acylhydrolase)	ER	7	31	31.1	High
A0A165ZTH6	1.76854	0.000547	up	yes	BZIP domain-containing protein OS=Daucus carota subsp. sativus OX=79200 GN=DCAR_009159 PE=4 SV=1	K14432	ABF	GO:0080090(biological_process:regulation of primary metabolic process); GO:0019222(biological_process:regulation of metabolic process); GO:0031328(biological_process:positive regulation of cellular biosynthetic process); GO:0031326(biological_process:regulation of cellular biosynthetic process); GO:0031325(biological_process:positive regulation of cellular metabolic process); GO:0051173(biologica…	map04075(Plant hormone signal transduction)	ENOG4110YI4(K:Transcription)	PF00170.22(bZIP_1:bZIP transcription factor); PF07716.16(bZIP_2:Basic region leucine zipper)	nuclear	3	7	48	High
A0A166C3I9	2.00777	0.01675	up	yes	Uncharacterized protein OS=Daucus carota subsp. sativus OX=79200 GN=DCAR_011994 PE=3 SV=1			GO:0030234(molecular_function:enzyme regulator activity); GO:0030414(molecular_function:peptidase inhibitor activity); GO:0050896(biological_process:response to stimulus); GO:0061134(molecular_function:peptidase regulator activity); GO:0009611(biological_process:response to wounding); GO:0006950(biological_process:response to stress); GO:0008150(biological_process:biological_process); GO:0004866(…		ENOG410Z25M(U:Intracellular trafficking, secretion, and vesicular transport)	PF00280.19(potato_inhibit:Potato inhibitor I family)	cytoplasmic	2	15	12.2	High
A0A166FM35	1.70691	0.002735	up	yes	Uncharacterized protein OS=Daucus carota subsp. sativus OX=79200 GN=DCAR_000603 PE=3 SV=1	K11883	NOB1	GO:0005488(molecular_function:binding); GO:0030688(cellular_component:preribosome, small subunit precursor); GO:0004540(molecular_function:ribonuclease activity); GO:0016787(molecular_function:hydrolase activity); GO:1901363(molecular_function:heterocyclic compound binding); GO:0019752(biological_process:carboxylic acid metabolic process); GO:0030684(cellular_component:preribosome); GO:0090304(bi…	map03008(Ribosome biogenesis in eukaryotes)	COG1439(S:Function unknown)	PF17146.5(PIN_6:PIN domain of ribonuclease); PF08772.12(NOB1_Zn_bind:Nin one binding (NOB1) Zn-ribbon like)	cytoplasmic	1	1	67.6	High
A0A161XID0	2.04429	0.000166	up	yes	Uncharacterized protein OS=Daucus carota subsp. sativus OX=79200 GN=DCAR_007706 PE=4 SV=1	K11090	LA, SSB	GO:0090304(biological_process:nucleic acid metabolic process); GO:0034641(biological_process:cellular nitrogen compound metabolic process); GO:0006807(biological_process:nitrogen compound metabolic process); GO:0003674(molecular_function:molecular_function); GO:0005488(molecular_function:binding); GO:0003676(molecular_function:nucleic acid binding); GO:0043227(cellular_component:membrane-bounded …		COG5193(J:Translation, ribosomal structure and biogenesis); COG5193(O:Posttranslational modification, protein turnover, chaperones)	PF08777.12(RRM_3:RNA binding motif); PF05383.18(La:La domain); PF00076.23(RRM_1:RNA recognition motif. (a.k.a. RRM, RBD, or RNP domain))	nuclear	9	26	51.6	High
A0A165Y7I8	2.09883	0.001207	up	yes	Uncharacterized protein OS=Daucus carota subsp. sativus OX=79200 GN=DCAR_013782 PE=4 SV=1	K12450	RHM	GO:0034641(biological_process:cellular nitrogen compound metabolic process); GO:0006807(biological_process:nitrogen compound metabolic process); GO:0003674(molecular_function:molecular_function); GO:0044281(biological_process:small molecule metabolic process); GO:0008460(molecular_function:dTDP-glucose 4,6-dehydratase activity); GO:1901360(biological_process:organic cyclic compound metabolic proc…	map00520(Amino sugar and nucleotide sugar metabolism)	COG1088(M:Cell wall/membrane/envelope biogenesis)	PF16363.6(GDP_Man_Dehyd:GDP-mannose 4,6 dehydratase); PF01370.22(Epimerase:NAD dependent epimerase/dehydratase family); PF04321.18(RmlD_sub_bind:RmlD substrate binding domain); PF01073.20(3Beta_HSD:3-beta hydroxysteroid dehydrogenase/isomerase family); PF02719.16(Polysacc_synt_2:Polysaccharide biosynthesis protein); PF07993.13(NAD_binding_4:Male sterility protein)	cytoplasmic	22	42	75.5	High
A0A166FFK2	2.00097	4e-06	up	yes	PPC domain-containing protein OS=Daucus carota subsp. sativus OX=79200 GN=DCAR_008563 PE=4 SV=1			GO:0043229(cellular_component:intracellular organelle); GO:0003674(molecular_function:molecular_function); GO:0005488(molecular_function:binding); GO:0003676(molecular_function:nucleic acid binding); GO:0003677(molecular_function:DNA binding); GO:0043227(cellular_component:membrane-bounded organelle); GO:0043226(cellular_component:organelle); GO:0043565(molecular_function:sequence-specific DNA bi…		ENOG410Y9GR(S:Function unknown)	PF03479.16(PCC:Plants and Prokaryotes Conserved (PCC) domain)	nuclear	1	2	31.2	Medium
A0A175YJK6	2.01268	0.000659	up	yes	Ubiquitinyl hydrolase 1 OS=Daucus carota subsp. sativus OX=79200 GN=DCAR_028833 PE=4 SV=1	K11863	ATXN3, MJD	GO:0101005(molecular_function:ubiquitinyl hydrolase activity); GO:0006807(biological_process:nitrogen compound metabolic process); GO:0003674(molecular_function:molecular_function); GO:0008233(molecular_function:peptidase activity); GO:0008234(molecular_function:cysteine-type peptidase activity); GO:0044267(biological_process:cellular protein metabolic process); GO:0019783(molecular_function:ubiq…	map04141(Protein processing in endoplasmic reticulum)	ENOG4111G4B(O:Posttranslational modification, protein turnover, chaperones)	PF02099.18(Josephin:Josephin)	cytoplasmic	2	13	30.8	High
A0A161ZPN3	1.93346	0.000542	up	yes	Uncharacterized protein OS=Daucus carota subsp. sativus OX=79200 GN=DCAR_023095 PE=3 SV=1	K12860	CDC5L, CDC5, CEF1	GO:0019752(biological_process:carboxylic acid metabolic process); GO:0006807(biological_process:nitrogen compound metabolic process); GO:0003674(molecular_function:molecular_function); GO:0044281(biological_process:small molecule metabolic process); GO:0003676(molecular_function:nucleic acid binding); GO:0003677(molecular_function:DNA binding); GO:1901363(molecular_function:heterocyclic compound …	map03040(Spliceosome)	COG5147(S:Function unknown)	PF11831.9(Myb_Cef:pre-mRNA splicing factor component); PF00249.32(Myb_DNA-binding:Myb-like DNA-binding domain); PF13921.7(Myb_DNA-bind_6:Myb-like DNA-binding domain)	nuclear	2	2	114.6	High
A0A165ZSE4	2.09749	0	up	yes	Uncharacterized protein OS=Daucus carota subsp. sativus OX=79200 GN=DCAR_009121 PE=3 SV=1	K01586	lysA	GO:0043231(cellular_component:intracellular membrane-bounded organelle); GO:0043648(biological_process:dicarboxylic acid metabolic process); GO:0019752(biological_process:carboxylic acid metabolic process); GO:0006553(biological_process:lysine metabolic process); GO:0044249(biological_process:cellular biosynthetic process); GO:0043229(cellular_component:intracellular organelle); GO:0006807(biolog…	map00300(Lysine biosynthesis)	COG0019(E:Amino acid transport and metabolism)	PF02784.17(Orn_Arg_deC_N:Pyridoxal-dependent decarboxylase, pyridoxal binding domain); PF00278.23(Orn_DAP_Arg_deC:Pyridoxal-dependent decarboxylase, C-terminal sheet domain); PF01168.21(Ala_racemase_N:Alanine racemase, N-terminal domain)	chloroplast	12	28	51.8	High
A0A161WXI5	2.11006	0.001531	up	yes	DNA polymerase epsilon catalytic subunit OS=Daucus carota subsp. sativus OX=79200 GN=DCAR_012181 PE=3 SV=1	K02324	POLE	GO:0008152(biological_process:metabolic process); GO:1901363(molecular_function:heterocyclic compound binding); GO:0043169(molecular_function:cation binding); GO:0034061(molecular_function:DNA polymerase activity); GO:0090304(biological_process:nucleic acid metabolic process); GO:0044249(biological_process:cellular biosynthetic process); GO:0034641(biological_process:cellular nitrogen compound me…	map03410(Base excision repair); map03420(Nucleotide excision repair); map03030(DNA replication)	COG0417(S:Function unknown)	PF08490.13(DUF1744:Domain of unknown function (DUF1744)); PF03104.20(DNA_pol_B_exo1:DNA polymerase family B, exonuclease domain); PF00136.22(DNA_pol_B:DNA polymerase family B); PF10108.10(DNA_pol_B_exo2:Predicted 3'-5' exonuclease related to the exonuclease domain of PolB)	nuclear	1	0	241.1	Medium
A0A166GA49	1.99219	0.006431	up	yes	Protein kinase domain-containing protein OS=Daucus carota subsp. sativus OX=79200 GN=DCAR_001384 PE=3 SV=1	K13415	BRI1	GO:0009593(biological_process:detection of chemical stimulus); GO:0035639(molecular_function:purine ribonucleoside triphosphate binding); GO:0009314(biological_process:response to radiation); GO:1901363(molecular_function:heterocyclic compound binding); GO:0009791(biological_process:post-embryonic development); GO:0009647(biological_process:skotomorphogenesis); GO:0031224(cellular_component:intri…	map04075(Plant hormone signal transduction)	COG4886(O:Posttranslational modification, protein turnover, chaperones)	PF00069.26(Pkinase:Protein kinase domain); PF07714.18(PK_Tyr_Ser-Thr:Protein tyrosine and serine/threonine kinase); PF13855.7(LRR_8:Leucine rich repeat); PF12799.8(LRR_4:Leucine Rich repeats (2 copies)); PF08263.13(LRRNT_2:Leucine rich repeat N-terminal domain)	ER	1	1	131.3	High
A0A165YZH2	2.05683	0.000352	up	yes	C2 domain-containing protein OS=Daucus carota subsp. sativus OX=79200 GN=DCAR_013209 PE=4 SV=1					ENOG410YHFC(S:Function unknown)	PF00168.31(C2:C2 domain)	cytoplasmic	1	2	46.3	High
A0A164U1E3	2.29925	6.6e-05	up	yes	WD_REPEATS_REGION domain-containing protein OS=Daucus carota subsp. sativus OX=79200 GN=DCAR_025380 PE=4 SV=1	K14753	RACK1	GO:0097159(molecular_function:organic cyclic compound binding); GO:0003674(molecular_function:molecular_function); GO:0005488(molecular_function:binding); GO:0003676(molecular_function:nucleic acid binding); GO:0003677(molecular_function:DNA binding); GO:1901363(molecular_function:heterocyclic compound binding)		ENOG410XQGZ(S:Function unknown)	PF00400.33(WD40:WD domain, G-beta repeat); PF12894.8(ANAPC4_WD40:Anaphase-promoting complex subunit 4 WD40 domain)	nuclear	14	50	36	High
A0A166G630	1.92925	0.002371	up	yes	Transcription elongation factor SPT5 OS=Daucus carota subsp. sativus OX=79200 GN=DCAR_001109 PE=3 SV=1	K15172	SUPT5H, SPT5	GO:1901566(biological_process:organonitrogen compound biosynthetic process); GO:0008023(cellular_component:transcription elongation factor complex); GO:0080090(biological_process:regulation of primary metabolic process); GO:0019222(biological_process:regulation of metabolic process); GO:0032044(cellular_component:DSIF complex); GO:0031326(biological_process:regulation of cellular biosynthetic pro…		COG5164(K:Transcription)	PF03439.14(Spt5-NGN:Early transcription elongation factor of RNA pol II, NGN section); PF00467.30(KOW:KOW motif)	nuclear	1	1	111.5	High
A0A162AIC7	1.99609	0.000212	up	yes	Mannan endo-1,4-beta-mannosidase OS=Daucus carota subsp. sativus OX=79200 GN=DCAR_010105 PE=3 SV=1	K19355	MAN	GO:0044238(biological_process:primary metabolic process); GO:0003674(molecular_function:molecular_function); GO:0005975(biological_process:carbohydrate metabolic process); GO:0004567(molecular_function:beta-mannosidase activity); GO:0016787(molecular_function:hydrolase activity); GO:0003824(molecular_function:catalytic activity); GO:0016985(molecular_function:mannan endo-1,4-beta-mannosidase acti…	map00051(Fructose and mannose metabolism)	COG3934(G:Carbohydrate transport and metabolism)	PF00150.19(Cellulase:Cellulase (glycosyl hydrolase family 5))	vacuolar	1	57	34.4	High
A0A161Y3F7	1.75768	0.000894	up	yes	Glutathione peroxidase OS=Daucus carota subsp. sativus OX=79200 GN=DCAR_023833 PE=3 SV=1	K00432	gpx, btuE, bsaA	GO:0005829(cellular_component:cytosol); GO:0043229(cellular_component:intracellular organelle); GO:0003674(molecular_function:molecular_function); GO:0005634(cellular_component:nucleus); GO:0043227(cellular_component:membrane-bounded organelle); GO:0043226(cellular_component:organelle); GO:0031224(cellular_component:intrinsic component of membrane); GO:0016491(molecular_function:oxidoreductase ac…	map00590(Arachidonic acid metabolism); map00480(Glutathione metabolism)	COG0386(O:Posttranslational modification, protein turnover, chaperones)	PF00255.20(GSHPx:Glutathione peroxidase); PF00578.22(AhpC-TSA:AhpC/TSA family)	chloroplast	2	13	18.8	High
A0A175YHF9	2.00197	0.00017	up	yes	Acyl carrier protein OS=Daucus carota subsp. sativus OX=79200 GN=DCAR_030568 PE=3 SV=1			GO:0006633(biological_process:fatty acid biosynthetic process); GO:0006631(biological_process:fatty acid metabolic process); GO:0019752(biological_process:carboxylic acid metabolic process); GO:0044249(biological_process:cellular biosynthetic process); GO:0003674(molecular_function:molecular_function); GO:0044281(biological_process:small molecule metabolic process); GO:0044283(biological_process:…		COG0236(I:Lipid transport and metabolism)	PF00550.26(PP-binding:Phosphopantetheine attachment site)	chloroplast	1	12	12.8	High
A0A164WTA1	2.32421	0.000749	up	yes	Bet_v_1 domain-containing protein OS=Daucus carota subsp. sativus OX=79200 GN=DCAR_020419 PE=4 SV=1			GO:0006952(biological_process:defense response); GO:0006950(biological_process:response to stress); GO:0008150(biological_process:biological_process); GO:0050896(biological_process:response to stimulus)		ENOG410YQ60(S:Function unknown)	PF00407.20(Bet_v_1:Pathogenesis-related protein Bet v 1 family)	cytoplasmic	7	71	17	High
A0A166F5Y0	2.0248	0.000242	up	yes	Uncharacterized protein OS=Daucus carota subsp. sativus OX=79200 GN=DCAR_008215 PE=4 SV=1			GO:0005575(cellular_component:cellular_component); GO:0016021(cellular_component:integral component of membrane); GO:0110165(cellular_component:cellular anatomical entity); GO:0031224(cellular_component:intrinsic component of membrane)				ER	1	5	17.1	Medium
A0A164Y0R2	2.05043	0.000414	up	yes	HATPase_c domain-containing protein OS=Daucus carota subsp. sativus OX=79200 GN=DCAR_017066 PE=3 SV=1	K04079	HSP90A, htpG	GO:0006457(biological_process:protein folding); GO:0035639(molecular_function:purine ribonucleoside triphosphate binding); GO:0003674(molecular_function:molecular_function); GO:0005488(molecular_function:binding); GO:0043167(molecular_function:ion binding); GO:1901363(molecular_function:heterocyclic compound binding); GO:1901265(molecular_function:nucleoside phosphate binding); GO:0043168(molecul…	map04626(Plant-pathogen interaction); map04141(Protein processing in endoplasmic reticulum)	COG0326(O:Posttranslational modification, protein turnover, chaperones)	PF00183.19(HSP90:Hsp90 protein); PF02518.27(HATPase_c:Histidine kinase-, DNA gyrase B-, and HSP90-like ATPase)	nuclear	3	50	79.4	High
A0A175YD01	2.11285	2.7e-05	up	yes	Thioredoxin domain-containing protein OS=Daucus carota subsp. sativus OX=79200 GN=DCAR_029099 PE=4 SV=1			GO:0019725(biological_process:cellular homeostasis); GO:0009987(biological_process:cellular process); GO:0005623(cellular_component:cell); GO:0050794(biological_process:regulation of cellular process); GO:0042592(biological_process:homeostatic process); GO:0008150(biological_process:biological_process); GO:0065007(biological_process:biological regulation); GO:0045454(biological_process:cell redox…		COG0526(U:Intracellular trafficking, secretion, and vesicular transport)	PF00085.21(Thioredoxin:Thioredoxin)	cytoplasmic	2	13	24.3	High
A0A166C5R8	2.05533	0.002748	up	yes	Aldedh domain-containing protein OS=Daucus carota subsp. sativus OX=79200 GN=DCAR_012080 PE=4 SV=1	K12355	REF1	GO:0004030(molecular_function:aldehyde dehydrogenase [NAD(P)+] activity); GO:0004029(molecular_function:aldehyde dehydrogenase (NAD) activity); GO:0016620(molecular_function:oxidoreductase activity, acting on the aldehyde or oxo group of donors, NAD or NADP as acceptor); GO:0003824(molecular_function:catalytic activity); GO:0016903(molecular_function:oxidoreductase activity, acting on the aldehyd…	map00940(Phenylpropanoid biosynthesis)	COG1012(C:Energy production and conversion)	PF00171.23(Aldedh:Aldehyde dehydrogenase family)	cytoplasmic	5	33	42.9	High
A0A164SV78	2.07856	0.000119	up	yes	YTH domain-containing protein OS=Daucus carota subsp. sativus OX=79200 GN=DCAR_023820 PE=4 SV=1	K20102	YTHDF	GO:0097159(molecular_function:organic cyclic compound binding); GO:0003674(molecular_function:molecular_function); GO:0005488(molecular_function:binding); GO:0003676(molecular_function:nucleic acid binding); GO:1901363(molecular_function:heterocyclic compound binding); GO:0003723(molecular_function:RNA binding)		ENOG410YABQ(S:Function unknown)	PF04146.16(YTH:YT521-B-like domain)	cytoplasmic	4	13	72.2	High
A0A166IIP8	1.72277	0.001358	up	yes	Coatomer subunit epsilon OS=Daucus carota subsp. sativus OX=79200 GN=DCAR_003828 PE=3 SV=1	K17268	COPE	GO:0008104(biological_process:protein localization); GO:0043229(cellular_component:intracellular organelle); GO:0003674(molecular_function:molecular_function); GO:0043227(cellular_component:membrane-bounded organelle); GO:0043226(cellular_component:organelle); GO:0042886(biological_process:amide transport); GO:0006888(biological_process:ER to Golgi vesicle-mediated transport); GO:0031982(cellular…		ENOG410XS5P(U:Intracellular trafficking, secretion, and vesicular transport)	PF04733.15(Coatomer_E:Coatomer epsilon subunit); PF07719.18(TPR_2:Tetratricopeptide repeat); PF14559.7(TPR_19:Tetratricopeptide repeat); PF13424.7(TPR_12:Tetratricopeptide repeat)	cytoplasmic	1	30	32.2	High
A0A175YGX5	1.90857	0.01578	up	yes	Xyloglucan endotransglucosylase/hydrolase OS=Daucus carota subsp. sativus OX=79200 GN=DCAR_029685 PE=3 SV=1	K08235	E2.4.1.207	GO:0003674(molecular_function:molecular_function); GO:0016798(molecular_function:hydrolase activity, acting on glycosyl bonds); GO:0048046(cellular_component:apoplast); GO:0044036(biological_process:cell wall macromolecule metabolic process); GO:0045229(biological_process:external encapsulating structure organization); GO:0071840(biological_process:cellular component organization or biogenesis); …		ENOG4110JM4(G:Carbohydrate transport and metabolism)	PF00722.22(Glyco_hydro_16:Glycosyl hydrolases family 16); PF06955.13(XET_C:Xyloglucan endo-transglycosylase (XET) C-terminus)	mitochondrial	3	12	34.2	High
A0A166EA23	2.02407	2e-05	up	yes	Uncharacterized protein OS=Daucus carota subsp. sativus OX=79200 GN=DCAR_007123 PE=3 SV=1	K00799	GST, gst	GO:0003824(molecular_function:catalytic activity); GO:0016740(molecular_function:transferase activity); GO:0003674(molecular_function:molecular_function)	map00480(Glutathione metabolism)	ENOG410XSIX(O:Posttranslational modification, protein turnover, chaperones)	PF02798.21(GST_N:Glutathione S-transferase, N-terminal domain); PF13417.7(GST_N_3:Glutathione S-transferase, N-terminal domain); PF13409.7(GST_N_2:Glutathione S-transferase, N-terminal domain); PF00043.26(GST_C:Glutathione S-transferase, C-terminal domain); PF13410.7(GST_C_2:Glutathione S-transferase, C-terminal domain)	mitochondrial	3	27	24.7	High
Q2VEY4	1.88846	9e-06	up	yes	Isopentenyl-diphosphate Delta-isomerase OS=Daucus carota subsp. sativus OX=79200 GN=IPI PE=2 SV=1	K01823	idi, IDI	GO:0071704(biological_process:organic substance metabolic process); GO:0016787(molecular_function:hydrolase activity); GO:0044238(biological_process:primary metabolic process); GO:0006629(biological_process:lipid metabolic process); GO:0044249(biological_process:cellular biosynthetic process); GO:0016853(molecular_function:isomerase activity); GO:0006720(biological_process:isoprenoid metabolic pr…	map00900(Terpenoid backbone biosynthesis)	COG1443(I:Lipid transport and metabolism)	PF00293.29(NUDIX:NUDIX domain)	peroxisomal	1	57	27.1	High
A0A162B2L8	1.88461	0.000219	up	yes	Tubulin alpha chain OS=Daucus carota subsp. sativus OX=79200 GN=DCAR_001869 PE=3 SV=1	K07374	TUBA	GO:0005200(molecular_function:structural constituent of cytoskeleton); GO:0099512(cellular_component:supramolecular fiber); GO:0099513(cellular_component:polymeric cytoskeletal fiber); GO:0048589(biological_process:developmental growth); GO:0035639(molecular_function:purine ribonucleoside triphosphate binding); GO:1901363(molecular_function:heterocyclic compound binding); GO:0003674(molecular_fun…	map04145(Phagosome)	COG5023(Z:Cytoskeleton)	PF00091.26(Tubulin:Tubulin/FtsZ family, GTPase domain); PF03953.18(Tubulin_C:Tubulin C-terminal domain)	cytoplasmic	4	45	49.7	High
A0A161ZMG6	2.05397	5.4e-05	up	yes	BPL/LPL catalytic domain-containing protein OS=Daucus carota subsp. sativus OX=79200 GN=DCAR_024544 PE=3 SV=1	K01942	HLCS	GO:0006807(biological_process:nitrogen compound metabolic process); GO:0003674(molecular_function:molecular_function); GO:0044267(biological_process:cellular protein metabolic process); GO:0044260(biological_process:cellular macromolecule metabolic process); GO:0071704(biological_process:organic substance metabolic process); GO:0018271(molecular_function:biotin-protein ligase activity); GO:000998…	map00780(Biotin metabolism)	COG0340(H:Coenzyme transport and metabolism)	PF03099.20(BPL_LplA_LipB:Biotin/lipoate A/B protein ligase family)	cytoplasmic	1	3	36.2	High
A0A164WYX2	1.76873	0.000447	up	yes	Oleosin OS=Daucus carota subsp. sativus OX=79200 GN=DCAR_020171 PE=3 SV=1			GO:0019953(biological_process:sexual reproduction); GO:0043229(cellular_component:intracellular organelle); GO:0043228(cellular_component:non-membrane-bounded organelle); GO:0012511(cellular_component:monolayer-surrounded lipid storage body); GO:0019915(biological_process:lipid storage); GO:0021700(biological_process:developmental maturation); GO:0043226(cellular_component:organelle); GO:0031224(…		ENOG410YP7Y(G:Carbohydrate transport and metabolism)	PF01277.18(Oleosin:Oleosin)	ER	2	23	14.3	High
A0A166H1P6	2.17124	0.000173	up	yes	Uncharacterized protein OS=Daucus carota subsp. sativus OX=79200 GN=DCAR_002270 PE=3 SV=1	K14797	ENP1, BYSL			ENOG410XPH5(S:Function unknown)	PF05291.12(Bystin:Bystin)	cytoplasmic	1	3	51.2	High
A0A161WXN0	1.94872	0.003633	up	yes	UBC core domain-containing protein OS=Daucus carota subsp. sativus OX=79200 GN=DCAR_012231 PE=4 SV=1	K10704	UBE2V			ENOG4111MDW(O:Posttranslational modification, protein turnover, chaperones)	PF00179.27(UQ_con:Ubiquitin-conjugating enzyme)	cytoplasmic	3	35	16.5	High
A0A166A490	1.93032	0.002005	up	yes	Fn3_like domain-containing protein OS=Daucus carota subsp. sativus OX=79200 GN=DCAR_009480 PE=3 SV=1			GO:0044238(biological_process:primary metabolic process); GO:0005975(biological_process:carbohydrate metabolic process); GO:0016787(molecular_function:hydrolase activity); GO:0003824(molecular_function:catalytic activity); GO:0016798(molecular_function:hydrolase activity, acting on glycosyl bonds); GO:0071704(biological_process:organic substance metabolic process); GO:0008150(biological_process:b…		COG1472(S:Function unknown)	PF01915.23(Glyco_hydro_3_C:Glycosyl hydrolase family 3 C-terminal domain); PF00933.22(Glyco_hydro_3:Glycosyl hydrolase family 3 N terminal domain); PF14310.7(Fn3-like:Fibronectin type III-like domain)	vacuolar	17	28	85.8	High
A0A169WCM0	1.93032	0.002162	up	yes	Amino_oxidase domain-containing protein OS=Daucus carota subsp. sativus OX=79200 GN=DCAR_010678 PE=4 SV=1	K12259	SMOX, PAO5	GO:0003824(molecular_function:catalytic activity); GO:0003674(molecular_function:molecular_function); GO:0016491(molecular_function:oxidoreductase activity)	map00330(Arginine and proline metabolism); map00410(beta-Alanine metabolism)	ENOG410XQW0(S:Function unknown)	PF01593.25(Amino_oxidase:Flavin containing amine oxidoreductase); PF13450.7(NAD_binding_8:NAD(P)-binding Rossmann-like domain)	peroxisomal	2	5	56.9	High
A0A166CB94	1.91504	4.8e-05	up	yes	Aminotran_5 domain-containing protein OS=Daucus carota subsp. sativus OX=79200 GN=DCAR_012298 PE=4 SV=1	K22207	LCD	GO:0046439(biological_process:L-cysteine metabolic process); GO:0019752(biological_process:carboxylic acid metabolic process); GO:0009063(biological_process:cellular amino acid catabolic process); GO:0006807(biological_process:nitrogen compound metabolic process); GO:0003674(molecular_function:molecular_function); GO:0044281(biological_process:small molecule metabolic process); GO:0044282(biologi…	map00270(Cysteine and methionine metabolism)	COG0520(E:Amino acid transport and metabolism)	PF00266.20(Aminotran_5:Aminotransferase class-V)	peroxisomal	5	14	50.8	High
A0A166I078	1.77819	0.000254	up	yes	Uncharacterized protein OS=Daucus carota subsp. sativus OX=79200 GN=DCAR_003263 PE=3 SV=1	K03124	TFIIB, GTF2B, SUA7, tfb	GO:0022607(biological_process:cellular component assembly); GO:0080090(biological_process:regulation of primary metabolic process); GO:0019222(biological_process:regulation of metabolic process); GO:0043933(biological_process:macromolecular complex subunit organization); GO:0017025(molecular_function:TBP-class protein binding); GO:0031323(biological_process:regulation of cellular metabolic proces…	map03022(Basal transcription factors)	COG1405(K:Transcription)	PF00382.20(TFIIB:Transcription factor TFIIB repeat)	cytoplasmic	1	4	21.8	High
A0A164YFQ6	1.88201	0.000131	up	yes	Uncharacterized protein OS=Daucus carota subsp. sativus OX=79200 GN=DCAR_017688 PE=4 SV=1	K13525	VCP, CDC48	GO:0008104(biological_process:protein localization); GO:0031593(molecular_function:polyubiquitin binding); GO:1901363(molecular_function:heterocyclic compound binding); GO:0071840(biological_process:cellular component organization or biogenesis); GO:0051716(biological_process:cellular response to stimulus); GO:0000166(molecular_function:nucleotide binding); GO:0033036(biological_process:macromole…	map04141(Protein processing in endoplasmic reticulum)	COG0464(O:Posttranslational modification, protein turnover, chaperones)	PF00004.30(AAA:ATPase family associated with various cellular activities (AAA)); PF17862.2(AAA_lid_3:AAA+ lid domain); PF02359.19(CDC48_N:Cell division protein 48 (CDC48), N-terminal domain); PF05496.13(RuvB_N:Holliday junction DNA helicase RuvB P-loop domain); PF07724.15(AAA_2:AAA domain (Cdc48 subfamily)); PF13191.7(AAA_16:AAA ATPase domain); PF02933.18(CDC48_2:Cell division protein 48 (CDC48),…	cytoplasmic	1	50	89.5	High
A0A166DEF5	1.98856	0.002776	up	yes	ADF-H domain-containing protein OS=Daucus carota subsp. sativus OX=79200 GN=DCAR_005999 PE=3 SV=1	K05765	CFL	GO:0015629(cellular_component:actin cytoskeleton); GO:0048589(biological_process:developmental growth); GO:0043933(biological_process:macromolecular complex subunit organization); GO:0043229(cellular_component:intracellular organelle); GO:0043228(cellular_component:non-membrane-bounded organelle); GO:0003674(molecular_function:molecular_function); GO:0005488(molecular_function:binding); GO:000965…		ENOG41122P5(S:Function unknown)	PF00241.21(Cofilin_ADF:Cofilin/tropomyosin-type actin-binding protein)	cytoplasmic	1	17	15.4	High
A0A169WCY2	2.02789	1e-06	up	yes	Uncharacterized protein OS=Daucus carota subsp. sativus OX=79200 GN=DCAR_010683 PE=4 SV=1	K11434	PRMT1	GO:0016274(molecular_function:protein-arginine N-methyltransferase activity); GO:0016273(molecular_function:arginine N-methyltransferase activity); GO:0003824(molecular_function:catalytic activity); GO:0008757(molecular_function:S-adenosylmethionine-dependent methyltransferase activity); GO:0140096(molecular_function:catalytic activity, acting on a protein); GO:0008170(molecular_function:N-methyl…		ENOG410XQYH(S:Function unknown)	PF06325.14(PrmA:Ribosomal protein L11 methyltransferase (PrmA)); PF13649.7(Methyltransf_25:Methyltransferase domain); PF08241.13(Methyltransf_11:Methyltransferase domain)	chloroplast	5	16	42.1	High
A0A166D0M3	1.893	4.7e-05	up	yes	Protein disulfide-isomerase OS=Daucus carota subsp. sativus OX=79200 GN=DCAR_005415 PE=3 SV=1	K09584	PDIA6, TXNDC7	GO:0005783(cellular_component:endoplasmic reticulum); GO:0042592(biological_process:homeostatic process); GO:0043229(cellular_component:intracellular organelle); GO:0003674(molecular_function:molecular_function); GO:0016864(molecular_function:intramolecular oxidoreductase activity, transposing S-S bonds); GO:0043227(cellular_component:membrane-bounded organelle); GO:0043226(cellular_component:org…	map04141(Protein processing in endoplasmic reticulum)	COG0526(S:Function unknown)	PF00085.21(Thioredoxin:Thioredoxin); PF07749.13(ERp29:Endoplasmic reticulum protein ERp29, C-terminal domain); PF04756.14(OST3_OST6:OST3 / OST6 family, transporter family); PF13098.7(Thioredoxin_2:Thioredoxin-like domain); PF13848.7(Thioredoxin_6:Thioredoxin-like domain)	ER	15	52	35	High
A0A161X0L4	1.83238	0.000187	up	yes	Uncharacterized protein OS=Daucus carota subsp. sativus OX=79200 GN=DCAR_005372 PE=3 SV=1			GO:0016787(molecular_function:hydrolase activity); GO:0003824(molecular_function:catalytic activity); GO:0016798(molecular_function:hydrolase activity, acting on glycosyl bonds); GO:0016788(molecular_function:hydrolase activity, acting on ester bonds); GO:0015928(molecular_function:fucosidase activity); GO:0004560(molecular_function:alpha-L-fucosidase activity); GO:0003674(molecular_function:mole…		ENOG410Y9BR(G:Carbohydrate transport and metabolism)	PF00657.23(Lipase_GDSL:GDSL-like Lipase/Acylhydrolase)	extracellular	3	13	42	High
A0A166AHT8	1.79229	0.003624	up	yes	AAI domain-containing protein OS=Daucus carota subsp. sativus OX=79200 GN=DCAR_010024 PE=4 SV=1						PF00234.23(Tryp_alpha_amyl:Protease inhibitor/seed storage/LTP family)	ER	3	16	17.2	High
A0A164ZH38	1.92118	0.002616	up	yes	Uncharacterized protein OS=Daucus carota subsp. sativus OX=79200 GN=DCAR_019159 PE=3 SV=1	K02918	RP-L35e, RPL35	GO:0044238(biological_process:primary metabolic process); GO:0043232(cellular_component:intracellular non-membrane-bounded organelle); GO:0044249(biological_process:cellular biosynthetic process); GO:0034641(biological_process:cellular nitrogen compound metabolic process); GO:0006807(biological_process:nitrogen compound metabolic process); GO:0003674(molecular_function:molecular_function); GO:003…	map03010(Ribosome)		PF00831.24(Ribosomal_L29:Ribosomal L29 protein)	chloroplast	2	33	14.3	High
A0A164ZZJ0	2.00466	0.001178	up	yes	60S ribosomal protein L36 OS=Daucus carota subsp. sativus OX=79200 GN=DCAR_015971 PE=3 SV=1	K02920	RP-L36e, RPL36	GO:0044238(biological_process:primary metabolic process); GO:0043232(cellular_component:intracellular non-membrane-bounded organelle); GO:0044249(biological_process:cellular biosynthetic process); GO:0034641(biological_process:cellular nitrogen compound metabolic process); GO:0006807(biological_process:nitrogen compound metabolic process); GO:0003674(molecular_function:molecular_function); GO:003…	map03010(Ribosome)	COG5051(J:Translation, ribosomal structure and biogenesis)	PF01158.19(Ribosomal_L36e:Ribosomal protein L36e)	nuclear	1	30	11.6	High
A0A162AS70	2.02664	0.006748	up	yes	Uncharacterized protein OS=Daucus carota subsp. sativus OX=79200 GN=DCAR_005960 PE=4 SV=1	K07025	K07025	GO:0016787(molecular_function:hydrolase activity); GO:0033883(molecular_function:pyridoxal phosphatase activity); GO:0016791(molecular_function:phosphatase activity); GO:0016788(molecular_function:hydrolase activity, acting on ester bonds); GO:0042578(molecular_function:phosphoric ester hydrolase activity); GO:0003824(molecular_function:catalytic activity); GO:0003674(molecular_function:molecular…		COG1011(S:Function unknown)	PF13419.7(HAD_2:Haloacid dehalogenase-like hydrolase)	cytoplasmic	2	7	32.5	High
A0A164T766	1.91214	0.000217	up	yes	RRM domain-containing protein OS=Daucus carota subsp. sativus OX=79200 GN=DCAR_024282 PE=4 SV=1	K14411	MSI	GO:0097159(molecular_function:organic cyclic compound binding); GO:0003674(molecular_function:molecular_function); GO:0005488(molecular_function:binding); GO:0003676(molecular_function:nucleic acid binding); GO:1901363(molecular_function:heterocyclic compound binding); GO:0003723(molecular_function:RNA binding)	map03015(mRNA surveillance pathway)	ENOG410YA8Z(S:Function unknown)	PF00076.23(RRM_1:RNA recognition motif. (a.k.a. RRM, RBD, or RNP domain)); PF16367.6(RRM_7:RNA recognition motif)	nuclear	5	22	35.6	High
A0A175YN30	1.88834	0.00013	up	yes	PCI domain-containing protein OS=Daucus carota subsp. sativus OX=79200 GN=DCAR_027444 PE=3 SV=1	K03036	PSMD11, RPN6	GO:0032991(cellular_component:macromolecular complex); GO:1902494(cellular_component:catalytic complex); GO:0016021(cellular_component:integral component of membrane); GO:0005575(cellular_component:cellular_component); GO:1905368(cellular_component:peptidase complex); GO:1905369(cellular_component:endopeptidase complex); GO:0110165(cellular_component:cellular anatomical entity); GO:0000502(cellul…	map03050(Proteasome)	COG5159(S:Function unknown)	PF18055.2(RPN6_N:26S proteasome regulatory subunit RPN6 N-terminal domain); PF01399.28(PCI:PCI domain); PF18503.2(RPN6_C_helix:26S proteasome subunit RPN6 C-terminal helix domain)	chloroplast	8	52	47	High
A0A161ZVT2	1.96434	6e-06	up	yes	Uncharacterized protein OS=Daucus carota subsp. sativus OX=79200 GN=DCAR_021585 PE=4 SV=1					COG4886(S:Function unknown)	PF13855.7(LRR_8:Leucine rich repeat); PF12799.8(LRR_4:Leucine Rich repeats (2 copies))	cytoplasmic	1	3	52.8	High
A0A161Y651	1.85979	6e-06	up	yes	3-hydroxy-3-methylglutaryl coenzyme A synthase OS=Daucus carota subsp. sativus OX=79200 GN=DCAR_005674 PE=3 SV=1	K01641	E2.3.3.10	GO:0006637(biological_process:acyl-CoA metabolic process); GO:0005829(cellular_component:cytosol); GO:0045337(biological_process:farnesyl diphosphate biosynthetic process); GO:1902767(biological_process:isoprenoid biosynthetic process via mevalonate); GO:0006139(biological_process:nucleobase-containing compound metabolic process); GO:0045338(biological_process:farnesyl diphosphate metabolic proce…	map00900(Terpenoid backbone biosynthesis); map00280(Valine, leucine and isoleucine degradation); map00072(Synthesis and degradation of ketone bodies); map00650(Butanoate metabolism)	COG3425(I:Lipid transport and metabolism)	PF08540.11(HMG_CoA_synt_C:Hydroxymethylglutaryl-coenzyme A synthase C terminal); PF01154.18(HMG_CoA_synt_N:Hydroxymethylglutaryl-coenzyme A synthase N terminal); PF08541.11(ACP_syn_III_C:3-Oxoacyl-[acyl-carrier-protein (ACP)] synthase III C terminal)	chloroplast	11	29	51.7	High
A0A161X3H1	1.98981	6.1e-05	up	yes	Adenosylhomocysteinase OS=Daucus carota subsp. sativus OX=79200 GN=DCAR_024107 PE=3 SV=1	K01251	E3.3.1.1, ahcY	GO:0016787(molecular_function:hydrolase activity); GO:0009987(biological_process:cellular process); GO:0005829(cellular_component:cytosol); GO:0071704(biological_process:organic substance metabolic process); GO:0016801(molecular_function:hydrolase activity, acting on ether bonds); GO:0004013(molecular_function:adenosylhomocysteinase activity); GO:0016802(molecular_function:trialkylsulfonium hydro…	map00270(Cysteine and methionine metabolism)	COG0499(H:Coenzyme transport and metabolism)	PF05221.18(AdoHcyase:S-adenosyl-L-homocysteine hydrolase); PF00670.22(AdoHcyase_NAD:S-adenosyl-L-homocysteine hydrolase, NAD binding domain); PF02826.20(2-Hacid_dh_C:D-isomer specific 2-hydroxyacid dehydrogenase, NAD binding domain)	cytoplasmic	7	65	53.1	High
A0A161XIS1	1.58782	0.002977	up	yes	Uncharacterized protein OS=Daucus carota subsp. sativus OX=79200 GN=DCAR_007886 PE=4 SV=1	K00162	PDHB, pdhB	GO:0044238(biological_process:primary metabolic process); GO:0006637(biological_process:acyl-CoA metabolic process); GO:0033866(biological_process:nucleoside bisphosphate biosynthetic process); GO:0019752(biological_process:carboxylic acid metabolic process); GO:0044249(biological_process:cellular biosynthetic process); GO:0034641(biological_process:cellular nitrogen compound metabolic process); …	map00020(Citrate cycle (TCA cycle)); map00010(Glycolysis / Gluconeogenesis); map00620(Pyruvate metabolism)	COG0022(C:Energy production and conversion)		chloroplast	1	9	13	High
A0A166DFE9	1.97059	0.001145	up	yes	PEROXIDASE_4 domain-containing protein OS=Daucus carota subsp. sativus OX=79200 GN=DCAR_006029 PE=3 SV=1	K00434	E1.11.1.11	GO:0000302(biological_process:response to reactive oxygen species); GO:0044248(biological_process:cellular catabolic process); GO:0043229(cellular_component:intracellular organelle); GO:0042744(biological_process:hydrogen peroxide catabolic process); GO:0003674(molecular_function:molecular_function); GO:0005488(molecular_function:binding); GO:0070887(biological_process:cellular response to chemic…	map00480(Glutathione metabolism); map00053(Ascorbate and aldarate metabolism)	COG0376(P:Inorganic ion transport and metabolism)	PF00141.24(peroxidase:Peroxidase)	cytoplasmic	3	49	27	High
A0A161XUQ6	2.12432	0.000386	up	yes	DNA ligase OS=Daucus carota subsp. sativus OX=79200 GN=DCAR_018768 PE=3 SV=1	K10747	LIG1	GO:0003676(molecular_function:nucleic acid binding); GO:0035639(molecular_function:purine ribonucleoside triphosphate binding); GO:0003677(molecular_function:DNA binding); GO:1901363(molecular_function:heterocyclic compound binding); GO:0051103(biological_process:DNA ligation involved in DNA repair); GO:0090304(biological_process:nucleic acid metabolic process); GO:0044249(biological_process:cell…	map03430(Mismatch repair); map03410(Base excision repair); map03420(Nucleotide excision repair); map03030(DNA replication)	COG1793(L:Replication, recombination and repair)	PF01068.22(DNA_ligase_A_M:ATP dependent DNA ligase domain); PF04675.15(DNA_ligase_A_N:DNA ligase N terminus); PF04679.16(DNA_ligase_A_C:ATP dependent DNA ligase C terminal region); PF09414.11(RNA_ligase:RNA ligase)	nuclear	1	1	83.3	High
A0A164Y0S3	1.81967	0.000676	up	yes	Uncharacterized protein OS=Daucus carota subsp. sativus OX=79200 GN=DCAR_017068 PE=3 SV=1	K00787	FDPS	GO:0016135(biological_process:saponin biosynthetic process); GO:0016134(biological_process:saponin metabolic process); GO:0016137(biological_process:glycoside metabolic process); GO:0008104(biological_process:protein localization); GO:0045184(biological_process:establishment of protein localization); GO:0046872(molecular_function:metal ion binding); GO:0016117(biological_process:carotenoid biosyn…	map00900(Terpenoid backbone biosynthesis)	COG0142(S:Function unknown)	PF00348.18(polyprenyl_synt:Polyprenyl synthetase)	cytoplasmic	11	29	39.4	High
A0A166DU08	1.81774	0.000386	up	yes	PCI domain-containing protein OS=Daucus carota subsp. sativus OX=79200 GN=DCAR_006513 PE=3 SV=1	K03031	PSMD8, RPN12	GO:0044238(biological_process:primary metabolic process); GO:1901564(biological_process:organonitrogen compound metabolic process); GO:0019538(biological_process:protein metabolic process); GO:0043170(biological_process:macromolecule metabolic process); GO:0005575(cellular_component:cellular_component); GO:0071704(biological_process:organic substance metabolic process); GO:0006807(biological_proc…	map03050(Proteasome)	ENOG410XXP2(O:Posttranslational modification, protein turnover, chaperones)	PF10075.10(CSN8_PSD8_EIF3K:CSN8/PSMD8/EIF3K family)	cytoplasmic	6	42	24	High
A0A164UWF7	1.86373	0.000106	up	yes	RRM domain-containing protein OS=Daucus carota subsp. sativus OX=79200 GN=DCAR_023171 PE=4 SV=1	K12741	HNRNPA1_3	GO:0080090(biological_process:regulation of primary metabolic process); GO:0019222(biological_process:regulation of metabolic process); GO:0031323(biological_process:regulation of cellular metabolic process); GO:0043229(cellular_component:intracellular organelle); GO:0003674(molecular_function:molecular_function); GO:0005488(molecular_function:binding); GO:0003676(molecular_function:nucleic acid …	map03040(Spliceosome)	COG0724(S:Function unknown); ENOG41121QZ(S:Function unknown)	PF00076.23(RRM_1:RNA recognition motif. (a.k.a. RRM, RBD, or RNP domain))	mitochondrial	2	21	21.6	High
A0A161ZZG4	1.82769	7.3e-05	up	yes	Uncharacterized protein OS=Daucus carota subsp. sativus OX=79200 GN=DCAR_019885 PE=4 SV=1			GO:0004866(molecular_function:endopeptidase inhibitor activity); GO:0061135(molecular_function:endopeptidase regulator activity); GO:0061134(molecular_function:peptidase regulator activity); GO:0003674(molecular_function:molecular_function); GO:0030414(molecular_function:peptidase inhibitor activity); GO:0004869(molecular_function:cysteine-type endopeptidase inhibitor activity); GO:0004857(molecu…				cytoplasmic	1	3	30.7	Medium
A0A161ZUX1	1.86555	3.2e-05	up	yes	ADF-H domain-containing protein OS=Daucus carota subsp. sativus OX=79200 GN=DCAR_020853 PE=3 SV=1	K05765	CFL	GO:0015629(cellular_component:actin cytoskeleton); GO:0043933(biological_process:macromolecular complex subunit organization); GO:0043229(cellular_component:intracellular organelle); GO:0043228(cellular_component:non-membrane-bounded organelle); GO:0003674(molecular_function:molecular_function); GO:0005488(molecular_function:binding); GO:0043226(cellular_component:organelle); GO:0071840(biologica…		ENOG41122P5(S:Function unknown)	PF00241.21(Cofilin_ADF:Cofilin/tropomyosin-type actin-binding protein)	chloroplast	3	42	15.9	High
A0A166B5R2	1.81932	5.1e-05	up	yes	UBC core domain-containing protein OS=Daucus carota subsp. sativus OX=79200 GN=DCAR_011148 PE=3 SV=1	K10573	UBE2A, UBC2, RAD6A	GO:0005488(molecular_function:binding); GO:0061650(molecular_function:ubiquitin-like protein conjugating enzyme activity); GO:0035639(molecular_function:purine ribonucleoside triphosphate binding); GO:0051603(biological_process:proteolysis involved in cellular protein catabolic process); GO:1901363(molecular_function:heterocyclic compound binding); GO:0090304(biological_process:nucleic acid metab…	map04120(Ubiquitin mediated proteolysis)	COG5078(C:Energy production and conversion)	PF00179.27(UQ_con:Ubiquitin-conjugating enzyme)	mitochondrial	1	11	17.2	High
A0A164THB2	1.78872	0.008553	up	yes	Glucose-6-phosphate 1-dehydrogenase OS=Daucus carota subsp. sativus OX=79200 GN=DCAR_024658 PE=3 SV=1	K00036	G6PD, zwf	GO:0006739(biological_process:NADP metabolic process); GO:0005996(biological_process:monosaccharide metabolic process); GO:0006098(biological_process:pentose-phosphate shunt); GO:0003674(molecular_function:molecular_function); GO:0005488(molecular_function:binding); GO:0006091(biological_process:generation of precursor metabolites and energy); GO:0043167(molecular_function:ion binding); GO:190136…	map00480(Glutathione metabolism); map00030(Pentose phosphate pathway)	COG0364(S:Function unknown)	PF02781.17(G6PD_C:Glucose-6-phosphate dehydrogenase, C-terminal domain); PF00479.23(G6PD_N:Glucose-6-phosphate dehydrogenase, NAD binding domain)	chloroplast	1	4	67.3	High
A0A175YJD2	1.80289	0.01716	up	yes	Uncharacterized protein OS=Daucus carota subsp. sativus OX=79200 GN=DCAR_030531 PE=4 SV=1						PF04108.13(APG17:Autophagy protein Apg17)	cytoplasmic	1	6	16.1	High
A0A175YF85	1.74456	0.000308	up	yes	Uncharacterized protein OS=Daucus carota subsp. sativus OX=79200 GN=DCAR_029722 PE=3 SV=1	K09522	DNAJC2	GO:0043231(cellular_component:intracellular membrane-bounded organelle); GO:0097159(molecular_function:organic cyclic compound binding); GO:0005634(cellular_component:nucleus); GO:1901363(molecular_function:heterocyclic compound binding); GO:0005575(cellular_component:cellular_component); GO:0043229(cellular_component:intracellular organelle); GO:0003674(molecular_function:molecular_function); GO…		COG5269(K:Transcription)	PF00226.32(DnaJ:DnaJ domain); PF00249.32(Myb_DNA-binding:Myb-like DNA-binding domain); PF13921.7(Myb_DNA-bind_6:Myb-like DNA-binding domain)	nuclear	3	7	73.6	High
A0A165A1A9	2.0329	2e-05	up	yes	Adenosylhomocysteinase OS=Daucus carota subsp. sativus OX=79200 GN=DCAR_015889 PE=3 SV=1	K01251	E3.3.1.1, ahcY	GO:0016787(molecular_function:hydrolase activity); GO:0009987(biological_process:cellular process); GO:0005829(cellular_component:cytosol); GO:0071704(biological_process:organic substance metabolic process); GO:0016801(molecular_function:hydrolase activity, acting on ether bonds); GO:0004013(molecular_function:adenosylhomocysteinase activity); GO:0016802(molecular_function:trialkylsulfonium hydro…	map00270(Cysteine and methionine metabolism)	COG0499(S:Function unknown)	PF05221.18(AdoHcyase:S-adenosyl-L-homocysteine hydrolase); PF00670.22(AdoHcyase_NAD:S-adenosyl-L-homocysteine hydrolase, NAD binding domain); PF02826.20(2-Hacid_dh_C:D-isomer specific 2-hydroxyacid dehydrogenase, NAD binding domain)	cytoplasmic	1	29	52.9	High
A0A166G5R0	1.69023	0.004425	up	yes	Uncharacterized protein OS=Daucus carota subsp. sativus OX=79200 GN=DCAR_001098 PE=3 SV=1			GO:0008150(biological_process:biological_process); GO:0016021(cellular_component:integral component of membrane); GO:0005575(cellular_component:cellular_component); GO:0003824(molecular_function:catalytic activity); GO:0016740(molecular_function:transferase activity); GO:0016741(molecular_function:transferase activity, transferring one-carbon groups); GO:0003674(molecular_function:molecular_funct…		ENOG410Y2C5(S:Function unknown)	PF03141.17(Methyltransf_29:Putative S-adenosyl-L-methionine-dependent methyltransferase); PF08241.13(Methyltransf_11:Methyltransferase domain); PF13649.7(Methyltransf_25:Methyltransferase domain)	Golgi apparatus	2	5	88.2	High
A0A161WV62	1.82324	0.00065	up	yes	ELYS domain-containing protein OS=Daucus carota subsp. sativus OX=79200 GN=DCAR_020178 PE=4 SV=1	K16278	HOS1	GO:0050896(biological_process:response to stimulus); GO:0009892(biological_process:negative regulation of metabolic process); GO:0080090(biological_process:regulation of primary metabolic process); GO:0019222(biological_process:regulation of metabolic process); GO:0031327(biological_process:negative regulation of cellular biosynthetic process); GO:0031326(biological_process:regulation of cellular…		ENOG4110YTD(S:Function unknown)	PF13934.7(ELYS:Nuclear pore complex assembly)	nuclear	3	5	76.6	High
A0A161WVU5	1.75143	0.002457	up	yes	Protein kinase domain-containing protein OS=Daucus carota subsp. sativus OX=79200 GN=DCAR_011591 PE=3 SV=1	K08856	STK16	GO:0035639(molecular_function:purine ribonucleoside triphosphate binding); GO:0003674(molecular_function:molecular_function); GO:0005488(molecular_function:binding); GO:0043167(molecular_function:ion binding); GO:1901363(molecular_function:heterocyclic compound binding); GO:1901265(molecular_function:nucleoside phosphate binding); GO:0005737(cellular_component:cytoplasm); GO:0000166(molecular_fun…			PF00069.26(Pkinase:Protein kinase domain); PF07714.18(PK_Tyr_Ser-Thr:Protein tyrosine and serine/threonine kinase)	cytoplasmic	1	4	38.6	High
A0A162ASZ3	1.83121	0.001158	up	yes	LRRNT_2 domain-containing protein OS=Daucus carota subsp. sativus OX=79200 GN=DCAR_006300 PE=4 SV=1					COG4886(S:Function unknown)	PF13855.7(LRR_8:Leucine rich repeat); PF12799.8(LRR_4:Leucine Rich repeats (2 copies)); PF08263.13(LRRNT_2:Leucine rich repeat N-terminal domain)	extracellular	2	7	38.4	High
A0A161XHC4	2.03429	0.000187	up	yes	WD_REPEATS_REGION domain-containing protein OS=Daucus carota subsp. sativus OX=79200 GN=DCAR_007266 PE=4 SV=1	K11374	ELP2	GO:0080090(biological_process:regulation of primary metabolic process); GO:0019222(biological_process:regulation of metabolic process); GO:0043543(biological_process:protein acylation); GO:0006473(biological_process:protein acetylation); GO:0031323(biological_process:regulation of cellular metabolic process); GO:0006807(biological_process:nitrogen compound metabolic process); GO:0016043(biologica…		ENOG410XRF0(S:Function unknown)	PF00400.33(WD40:WD domain, G-beta repeat)	chloroplast	1	1	92.9	Medium
A0A166HFD7	1.66297	0.02012	up	yes	UDP-glucuronate decarboxylase OS=Daucus carota subsp. sativus OX=79200 GN=DCAR_002833 PE=3 SV=1	K08678	UXS1, uxs	GO:0005575(cellular_component:cellular_component); GO:0016021(cellular_component:integral component of membrane); GO:0110165(cellular_component:cellular anatomical entity); GO:0031224(cellular_component:intrinsic component of membrane)	map00520(Amino sugar and nucleotide sugar metabolism)	COG0451(S:Function unknown)	PF16363.6(GDP_Man_Dehyd:GDP-mannose 4,6 dehydratase); PF01370.22(Epimerase:NAD dependent epimerase/dehydratase family)	cytoplasmic	1	20	25	High
A0A175YP77	1.51219	0.01231	up	yes	RRM domain-containing protein OS=Daucus carota subsp. sativus OX=79200 GN=DCAR_027660 PE=4 SV=1	K12881	THOC4, ALY	GO:0097159(molecular_function:organic cyclic compound binding); GO:0003674(molecular_function:molecular_function); GO:0005488(molecular_function:binding); GO:0003676(molecular_function:nucleic acid binding); GO:1901363(molecular_function:heterocyclic compound binding); GO:0003723(molecular_function:RNA binding)	map03013(RNA transport); map03015(mRNA surveillance pathway); map03040(Spliceosome)	ENOG4111JAW(S:Function unknown)	PF00076.23(RRM_1:RNA recognition motif. (a.k.a. RRM, RBD, or RNP domain)); PF13865.7(FoP_duplication:C-terminal duplication domain of Friend of PRMT1)	chloroplast	1	5	27.5	High
A0A175YPX8	1.84486	0.000407	up	yes	Uncharacterized protein OS=Daucus carota subsp. sativus OX=79200 GN=DCAR_027075 PE=4 SV=1	K05931	CARM1, PRMT4	GO:0016274(molecular_function:protein-arginine N-methyltransferase activity); GO:0016273(molecular_function:arginine N-methyltransferase activity); GO:0003824(molecular_function:catalytic activity); GO:0008757(molecular_function:S-adenosylmethionine-dependent methyltransferase activity); GO:0140096(molecular_function:catalytic activity, acting on a protein); GO:0008170(molecular_function:N-methyl…		ENOG410XPDD(K:Transcription)	PF06325.14(PrmA:Ribosomal protein L11 methyltransferase (PrmA)); PF13649.7(Methyltransf_25:Methyltransferase domain)	chloroplast	11	25	56.2	High
A0A164ZQ77	1.76104	0.006317	up	yes	Uncharacterized protein OS=Daucus carota subsp. sativus OX=79200 GN=DCAR_019480 PE=3 SV=1			GO:0009892(biological_process:negative regulation of metabolic process); GO:0080090(biological_process:regulation of primary metabolic process); GO:0019222(biological_process:regulation of metabolic process); GO:0031324(biological_process:negative regulation of cellular metabolic process); GO:0031323(biological_process:regulation of cellular metabolic process); GO:0030414(molecular_function:pepti…		COG4826(S:Function unknown)	PF00079.21(Serpin:Serpin (serine protease inhibitor))	extracellular	1	30	74.7	High
A0A166GD49	1.82515	2.6e-05	up	yes	Coatomer subunit beta OS=Daucus carota subsp. sativus OX=79200 GN=DCAR_001480 PE=4 SV=1	K17301	COPB1, SEC26	GO:0008104(biological_process:protein localization); GO:0015833(biological_process:peptide transport); GO:0003674(molecular_function:molecular_function); GO:0042886(biological_process:amide transport); GO:0006888(biological_process:ER to Golgi vesicle-mediated transport); GO:0031090(cellular_component:organelle membrane); GO:0006886(biological_process:intracellular protein transport); GO:0016020(…		COG5096(U:Intracellular trafficking, secretion, and vesicular transport)	PF01602.21(Adaptin_N:Adaptin N terminal region); PF07718.13(Coatamer_beta_C:Coatomer beta C-terminal region); PF14806.7(Coatomer_b_Cpla:Coatomer beta subunit appendage platform)	cytoplasmic	11	31	105.6	High
A0A164ZY48	1.73975	0.005327	up	yes	Oleosin OS=Daucus carota subsp. sativus OX=79200 GN=DCAR_016034 PE=3 SV=1			GO:0019915(biological_process:lipid storage); GO:0043229(cellular_component:intracellular organelle); GO:0043228(cellular_component:non-membrane-bounded organelle); GO:0012511(cellular_component:monolayer-surrounded lipid storage body); GO:0050826(biological_process:response to freezing); GO:0043226(cellular_component:organelle); GO:0031224(cellular_component:intrinsic component of membrane); GO:…		ENOG410YRX9(S:Function unknown)	PF01277.18(Oleosin:Oleosin)	peroxisomal	5	39	16	High
A0A161ZRT8	1.80019	9.4e-05	up	yes	FAD-binding PCMH-type domain-containing protein OS=Daucus carota subsp. sativus OX=79200 GN=DCAR_022193 PE=3 SV=1	K22395	K22395	GO:0043168(molecular_function:anion binding); GO:0050660(molecular_function:flavin adenine dinucleotide binding); GO:0097159(molecular_function:organic cyclic compound binding); GO:0000166(molecular_function:nucleotide binding); GO:0036094(molecular_function:small molecule binding); GO:0003824(molecular_function:catalytic activity); GO:0016491(molecular_function:oxidoreductase activity); GO:00036…	map00940(Phenylpropanoid biosynthesis)	COG0277(U:Intracellular trafficking, secretion, and vesicular transport)	PF01565.24(FAD_binding_4:FAD binding domain); PF08031.13(BBE:Berberine and berberine like)	vacuolar	6	15	59	High
A0A165ZYI8	1.77317	0.002219	up	yes	Uncharacterized protein OS=Daucus carota subsp. sativus OX=79200 GN=DCAR_009310 PE=3 SV=1			GO:0016787(molecular_function:hydrolase activity); GO:0003674(molecular_function:molecular_function); GO:0016788(molecular_function:hydrolase activity, acting on ester bonds); GO:0003824(molecular_function:catalytic activity)		COG3240(K:Transcription)	PF00657.23(Lipase_GDSL:GDSL-like Lipase/Acylhydrolase)	ER	8	22	39.4	High
A0A166ECA3	1.69831	0.000493	up	yes	Uncharacterized protein OS=Daucus carota subsp. sativus OX=79200 GN=DCAR_007208 PE=3 SV=1			GO:0043229(cellular_component:intracellular organelle); GO:0003674(molecular_function:molecular_function); GO:0005488(molecular_function:binding); GO:0003676(molecular_function:nucleic acid binding); GO:0003677(molecular_function:DNA binding); GO:0043227(cellular_component:membrane-bounded organelle); GO:0043226(cellular_component:organelle); GO:0043565(molecular_function:sequence-specific DNA bi…		COG2178(J:Translation, ribosomal structure and biogenesis)	PF01997.17(Translin:Translin family)	extracellular	3	11	29.3	High
A0A165WYV8	1.73429	3.5e-05	up	yes	Uncharacterized protein OS=Daucus carota subsp. sativus OX=79200 GN=DCAR_014859 PE=3 SV=1	K03678	RRP45, EXOSC9	GO:0016070(biological_process:RNA metabolic process); GO:0090304(biological_process:nucleic acid metabolic process); GO:0000178(cellular_component:exosome (RNase complex)); GO:0044238(biological_process:primary metabolic process); GO:0032991(cellular_component:macromolecular complex); GO:1902494(cellular_component:catalytic complex); GO:0006139(biological_process:nucleobase-containing compound me…	map03018(RNA degradation)	COG2123(S:Function unknown)	PF01138.22(RNase_PH:3' exoribonuclease family, domain 1); PF03725.16(RNase_PH_C:3' exoribonuclease family, domain 2)	chloroplast	2	5	49	High
A0A175YPP3	2.00209	2.4e-05	up	yes	Uncharacterized protein OS=Daucus carota subsp. sativus OX=79200 GN=DCAR_026993 PE=3 SV=1	K18674	GALK2	GO:0019200(molecular_function:carbohydrate kinase activity); GO:0035639(molecular_function:purine ribonucleoside triphosphate binding); GO:0030246(molecular_function:carbohydrate binding); GO:0005996(biological_process:monosaccharide metabolic process); GO:0003674(molecular_function:molecular_function); GO:0048029(molecular_function:monosaccharide binding); GO:0043167(molecular_function:ion bindi…		COG0153(G:Carbohydrate transport and metabolism)	PF10509.10(GalKase_gal_bdg:Galactokinase galactose-binding signature); PF00288.27(GHMP_kinases_N:GHMP kinases N terminal domain); PF08544.14(GHMP_kinases_C:GHMP kinases C terminal)	cytoplasmic	4	18	57	High
A0A161WTJ4	1.90915	1.5e-05	up	yes	Uncharacterized protein OS=Daucus carota subsp. sativus OX=79200 GN=DCAR_020728 PE=3 SV=1	K02962	RP-S17e, RPS17	GO:0044238(biological_process:primary metabolic process); GO:0043232(cellular_component:intracellular non-membrane-bounded organelle); GO:0044249(biological_process:cellular biosynthetic process); GO:0034641(biological_process:cellular nitrogen compound metabolic process); GO:0006807(biological_process:nitrogen compound metabolic process); GO:0003674(molecular_function:molecular_function); GO:003…	map03010(Ribosome)	COG1383(J:Translation, ribosomal structure and biogenesis)	PF00833.19(Ribosomal_S17e:Ribosomal S17)	nuclear	1	46	16.6	High
A0A164V7H8	1.93449	0.000822	up	yes	Transmembrane 9 superfamily member OS=Daucus carota subsp. sativus OX=79200 GN=DCAR_022712 PE=3 SV=1	K17086	TM9SF2_4	GO:0034613(biological_process:cellular protein localization); GO:0070727(biological_process:cellular macromolecule localization); GO:0016021(cellular_component:integral component of membrane); GO:0016020(cellular_component:membrane); GO:0005575(cellular_component:cellular_component); GO:0008104(biological_process:protein localization); GO:0008150(biological_process:biological_process); GO:0031224…		ENOG410XPIW(S:Function unknown)	PF02990.17(EMP70:Endomembrane protein 70)	Golgi apparatus	1	7	73.5	High
A0A166AD13	1.95361	0.000387	up	yes	Uncharacterized protein OS=Daucus carota subsp. sativus OX=79200 GN=DCAR_009824 PE=4 SV=1			GO:0016758(molecular_function:transferase activity, transferring hexosyl groups); GO:0016740(molecular_function:transferase activity); GO:0003674(molecular_function:molecular_function); GO:0016757(molecular_function:transferase activity, transferring glycosyl groups); GO:0003824(molecular_function:catalytic activity)		COG1819(K:Transcription)		extracellular	2	16	20.7	High
A0A175YNP6	1.88698	0	up	yes	3-isopropylmalate dehydratase OS=Daucus carota subsp. sativus OX=79200 GN=DCAR_027353 PE=4 SV=1	K01703	leuC, IPMI-L	GO:0019752(biological_process:carboxylic acid metabolic process); GO:0043436(biological_process:oxoacid metabolic process); GO:0006807(biological_process:nitrogen compound metabolic process); GO:0003674(molecular_function:molecular_function); GO:0044281(biological_process:small molecule metabolic process); GO:0044283(biological_process:small molecule biosynthetic process); GO:1901576(biological_p…	map00660(C5-Branched dibasic acid metabolism); map00966(Glucosinolate biosynthesis); map00290(Valine, leucine and isoleucine biosynthesis)	COG0065(D:Cell cycle control, cell division, chromosome partitioning)	PF00330.21(Aconitase:Aconitase family (aconitate hydratase))	chloroplast	5	21	58.8	High
A0A162AZ12	1.84111	5.3e-05	up	yes	ADH_N domain-containing protein OS=Daucus carota subsp. sativus OX=79200 GN=DCAR_000552 PE=4 SV=1	K00121	frmA, ADH5, adhC	GO:0003674(molecular_function:molecular_function); GO:0005488(molecular_function:binding); GO:0006091(biological_process:generation of precursor metabolites and energy); GO:0016491(molecular_function:oxidoreductase activity); GO:0043169(molecular_function:cation binding); GO:0046914(molecular_function:transition metal ion binding); GO:0043167(molecular_function:ion binding); GO:0071704(biological…	map00010(Glycolysis / Gluconeogenesis); map00071(Fatty acid degradation); map00350(Tyrosine metabolism)	COG1062(S:Function unknown)	PF08240.13(ADH_N:Alcohol dehydrogenase GroES-like domain)	cytoplasmic	9	56	31.9	High
A0A166FNJ4	1.72233	0.000297	up	yes	PCI domain-containing protein OS=Daucus carota subsp. sativus OX=79200 GN=DCAR_000654 PE=3 SV=1	K03039	PSMD13, RPN9	GO:0022607(biological_process:cellular component assembly); GO:0043933(biological_process:macromolecular complex subunit organization); GO:0044248(biological_process:cellular catabolic process); GO:0043229(cellular_component:intracellular organelle); GO:0006807(biological_process:nitrogen compound metabolic process); GO:0003674(molecular_function:molecular_function); GO:0043248(biological_process…	map03050(Proteasome)	ENOG410XPG9(O:Posttranslational modification, protein turnover, chaperones)	PF01399.28(PCI:PCI domain)	nuclear	3	31	44.3	High
A0A166HTY4	1.81639	0.000538	up	yes	Uncharacterized protein OS=Daucus carota subsp. sativus OX=79200 GN=DCAR_003047 PE=4 SV=1	K11090	LA, SSB	GO:0090304(biological_process:nucleic acid metabolic process); GO:0034641(biological_process:cellular nitrogen compound metabolic process); GO:0006807(biological_process:nitrogen compound metabolic process); GO:0003674(molecular_function:molecular_function); GO:0005488(molecular_function:binding); GO:0003676(molecular_function:nucleic acid binding); GO:0043227(cellular_component:membrane-bounded …		COG5193(J:Translation, ribosomal structure and biogenesis); COG5193(O:Posttranslational modification, protein turnover, chaperones)	PF08777.12(RRM_3:RNA binding motif); PF05383.18(La:La domain); PF00076.23(RRM_1:RNA recognition motif. (a.k.a. RRM, RBD, or RNP domain))	nuclear	10	27	52.3	High
A0A165WWK3	1.70426	0.000392	up	yes	Prephenate/arogenate dehydrogenase domain-containing protein OS=Daucus carota subsp. sativus OX=79200 GN=DCAR_014910 PE=4 SV=1	K15227	TYRAAT	GO:0019752(biological_process:carboxylic acid metabolic process); GO:0044249(biological_process:cellular biosynthetic process); GO:0043229(cellular_component:intracellular organelle); GO:0006807(biological_process:nitrogen compound metabolic process); GO:0003674(molecular_function:molecular_function); GO:0044281(biological_process:small molecule metabolic process); GO:0044283(biological_process:s…	map00400(Phenylalanine, tyrosine and tryptophan biosynthesis)	COG0287(E:Amino acid transport and metabolism)	PF02153.18(PDH:Prephenate dehydrogenase); PF03807.18(F420_oxidored:NADP oxidoreductase coenzyme F420-dependent); PF03446.16(NAD_binding_2:NAD binding domain of 6-phosphogluconate dehydrogenase); PF02826.20(2-Hacid_dh_C:D-isomer specific 2-hydroxyacid dehydrogenase, NAD binding domain)	chloroplast	1	3	42.6	High
A0A164TEI9	1.50527	0.003497	up	yes	Uncharacterized protein OS=Daucus carota subsp. sativus OX=79200 GN=DCAR_024559 PE=4 SV=1					COG0517(S:Function unknown); ENOG4110YYU(S:Function unknown)	PF16561.6(AMPK1_CBM:Glycogen recognition site of AMP-activated protein kinase); PF00571.29(CBS:CBS domain)	cytoplasmic	1	4	51.7	High
A0A162ASL2	1.8075	0.009453	up	yes	Uncharacterized protein OS=Daucus carota subsp. sativus OX=79200 GN=DCAR_006150 PE=4 SV=1	K12736	PPWD1	GO:1902275(biological_process:regulation of chromatin organization); GO:0048443(biological_process:stamen development); GO:0048440(biological_process:carpel development); GO:0042393(molecular_function:histone binding); GO:0006457(biological_process:protein folding); GO:0080090(biological_process:regulation of primary metabolic process); GO:0019222(biological_process:regulation of metabolic proces…		ENOG410XQB4(O:Posttranslational modification, protein turnover, chaperones)	PF00160.22(Pro_isomerase:Cyclophilin type peptidyl-prolyl cis-trans isomerase/CLD); PF00400.33(WD40:WD domain, G-beta repeat)	nuclear	3	5	68.2	High
A0A175YM05	1.65051	0.002399	up	yes	Uncharacterized protein OS=Daucus carota subsp. sativus OX=79200 GN=DCAR_028191 PE=3 SV=1	K13347	PXMP2, PMP22	GO:0005737(cellular_component:cytoplasm); GO:0005575(cellular_component:cellular_component); GO:0016021(cellular_component:integral component of membrane); GO:0031224(cellular_component:intrinsic component of membrane); GO:0110165(cellular_component:cellular anatomical entity)	map04146(Peroxisome)	ENOG4111SYH(S:Function unknown)	PF04117.13(Mpv17_PMP22:Mpv17 / PMP22 family)	peroxisomal	1	10	20.3	High
A0A161Y3V9	1.8083	0.000307	up	yes	Uncharacterized protein OS=Daucus carota subsp. sativus OX=79200 GN=DCAR_012673 PE=4 SV=1	K17265	G3BP1	GO:0097159(molecular_function:organic cyclic compound binding); GO:0003674(molecular_function:molecular_function); GO:0005488(molecular_function:binding); GO:0003676(molecular_function:nucleic acid binding); GO:1901363(molecular_function:heterocyclic compound binding); GO:0003723(molecular_function:RNA binding)		ENOG410YV57(S:Function unknown)	PF02136.21(NTF2:Nuclear transport factor 2 (NTF2) domain); PF00076.23(RRM_1:RNA recognition motif. (a.k.a. RRM, RBD, or RNP domain))	cytoplasmic	4	12	52.4	High
A0A175YBW2	2.03137	3.1e-05	up	yes	Uncharacterized protein OS=Daucus carota subsp. sativus OX=79200 GN=DCAR_031330 PE=4 SV=1			GO:1903046(biological_process:meiotic cell cycle process); GO:0090304(biological_process:nucleic acid metabolic process); GO:0034641(biological_process:cellular nitrogen compound metabolic process); GO:0006807(biological_process:nitrogen compound metabolic process); GO:0022402(biological_process:cell cycle process); GO:1901360(biological_process:organic cyclic compound metabolic process); GO:0006…		ENOG410YEHK(S:Function unknown)		mitochondrial	1	2	101.6	High
A0A164YI61	1.73699	0.009299	up	yes	Thioredoxin-like_fold domain-containing protein OS=Daucus carota subsp. sativus OX=79200 GN=DCAR_017788 PE=4 SV=1	K17609	NXN	GO:0005575(cellular_component:cellular_component); GO:0032991(cellular_component:macromolecular complex); GO:0032040(cellular_component:small-subunit processome); GO:1990904(cellular_component:ribonucleoprotein complex); GO:0030684(cellular_component:preribosome)		ENOG410ZIWC(O:Posttranslational modification, protein turnover, chaperones)	PF13905.7(Thioredoxin_8:Thioredoxin-like)	cytoplasmic	3	6	67.3	High
A0A164ZQ47	1.57246	0.00132	up	yes	SERPIN domain-containing protein OS=Daucus carota subsp. sativus OX=79200 GN=DCAR_019477 PE=3 SV=1			GO:0005575(cellular_component:cellular_component); GO:0005615(cellular_component:extracellular space); GO:0110165(cellular_component:cellular anatomical entity)		COG4826(O:Posttranslational modification, protein turnover, chaperones)	PF00079.21(Serpin:Serpin (serine protease inhibitor))	cytoplasmic	1	31	43	High
A0A162ALL9	1.77148	0.000381	up	yes	Uncharacterized protein OS=Daucus carota subsp. sativus OX=79200 GN=DCAR_003282 PE=4 SV=1	K12598	MTR4, SKIV2L2	GO:0003676(molecular_function:nucleic acid binding); GO:0035639(molecular_function:purine ribonucleoside triphosphate binding); GO:0016817(molecular_function:hydrolase activity, acting on acid anhydrides); GO:0090304(biological_process:nucleic acid metabolic process); GO:0032553(molecular_function:ribonucleotide binding); GO:0034641(biological_process:cellular nitrogen compound metabolic process)…	map03018(RNA degradation)	COG4581(L:Replication, recombination and repair)	PF13234.7(rRNA_proc-arch:rRNA-processing arch domain); PF08148.13(DSHCT:DSHCT (NUC185) domain); PF00270.30(DEAD:DEAD/DEAH box helicase); PF04851.16(ResIII:Type III restriction enzyme, res subunit); PF00271.32(Helicase_C:Helicase conserved C-terminal domain)	nuclear	2	4	112.6	High
A0A166IMR4	1.71292	0.001311	up	yes	Coatomer subunit zeta OS=Daucus carota subsp. sativus OX=79200 GN=DCAR_003950 PE=3 SV=1	K20472	COPZ, RET3	GO:0008104(biological_process:protein localization); GO:0015833(biological_process:peptide transport); GO:0030117(cellular_component:membrane coat); GO:0042886(biological_process:amide transport); GO:0031090(cellular_component:organelle membrane); GO:0006886(biological_process:intracellular protein transport); GO:0016020(cellular_component:membrane); GO:0071705(biological_process:nitrogen compoun…		COG5541(U:Intracellular trafficking, secretion, and vesicular transport)	PF01217.21(Clat_adaptor_s:Clathrin adaptor complex small chain)	cytoplasmic	1	14	22.3	High
A0A161Y6C0	1.6183	0.04639	up	yes	Uncharacterized protein OS=Daucus carota subsp. sativus OX=79200 GN=DCAR_005754 PE=4 SV=1			GO:0005783(cellular_component:endoplasmic reticulum); GO:0005575(cellular_component:cellular_component); GO:0043229(cellular_component:intracellular organelle); GO:0043227(cellular_component:membrane-bounded organelle); GO:0043226(cellular_component:organelle); GO:0110165(cellular_component:cellular anatomical entity); GO:0043231(cellular_component:intracellular membrane-bounded organelle)		ENOG4111MQV(S:Function unknown)		ER	2	6	35.4	High
A0A175YR16	1.77375	0.000534	up	yes	Bet_v_1 domain-containing protein OS=Daucus carota subsp. sativus OX=79200 GN=DCAR_027040 PE=3 SV=1			GO:0038023(molecular_function:signaling receptor activity); GO:0031406(molecular_function:carboxylic acid binding); GO:0019208(molecular_function:phosphatase regulator activity); GO:0060089(molecular_function:molecular transducer activity); GO:0003674(molecular_function:molecular_function); GO:0007165(biological_process:signal transduction); GO:0004857(molecular_function:enzyme inhibitor activity…		ENOG410ZD18(S:Function unknown)	PF00407.20(Bet_v_1:Pathogenesis-related protein Bet v 1 family)	cytoplasmic	10	82	16.6	High
A0A165WMZ2	1.76195	0.002083	up	yes	AMP-binding_C domain-containing protein OS=Daucus carota subsp. sativus OX=79200 GN=DCAR_015119 PE=4 SV=1			GO:0016021(cellular_component:integral component of membrane); GO:0005575(cellular_component:cellular_component); GO:0003824(molecular_function:catalytic activity); GO:0003674(molecular_function:molecular_function); GO:0031224(cellular_component:intrinsic component of membrane); GO:0110165(cellular_component:cellular anatomical entity)		COG0365(I:Lipid transport and metabolism)	PF13193.7(AMP-binding_C:AMP-binding enzyme C-terminal domain)	peroxisomal	1	7	30.8	High
A0A164XAF6	1.83522	0.004202	up	yes	WD_REPEATS_REGION domain-containing protein OS=Daucus carota subsp. sativus OX=79200 GN=DCAR_016160 PE=3 SV=1	K10752	RBBP4, HAT2, CAF1, MIS16	GO:0043231(cellular_component:intracellular membrane-bounded organelle); GO:0005634(cellular_component:nucleus); GO:0005575(cellular_component:cellular_component); GO:0043229(cellular_component:intracellular organelle); GO:0043227(cellular_component:membrane-bounded organelle); GO:0043226(cellular_component:organelle); GO:0110165(cellular_component:cellular anatomical entity)		ENOG410XNU9(S:Function unknown)	PF00400.33(WD40:WD domain, G-beta repeat); PF12265.9(CAF1C_H4-bd:Histone-binding protein RBBP4 or subunit C of CAF1 complex)	nuclear	3	11	47	High
A0A164TIY0	1.88514	3e-06	up	yes	Arginyl-tRNA synthetase OS=Daucus carota subsp. sativus OX=79200 GN=DCAR_024710 PE=3 SV=1	K01887	RARS, argS	GO:0035639(molecular_function:purine ribonucleoside triphosphate binding); GO:0019752(biological_process:carboxylic acid metabolic process); GO:0090304(biological_process:nucleic acid metabolic process); GO:0034641(biological_process:cellular nitrogen compound metabolic process); GO:0006807(biological_process:nitrogen compound metabolic process); GO:0003674(molecular_function:molecular_function);…	map00970(Aminoacyl-tRNA biosynthesis)	COG0018(J:Translation, ribosomal structure and biogenesis)	PF00750.20(tRNA-synt_1d:tRNA synthetases class I (R)); PF05746.16(DALR_1:DALR anticodon binding domain); PF03485.17(Arg_tRNA_synt_N:Arginyl tRNA synthetase N terminal domain)	cytoplasmic	16	34	64	High
A0A161ZWB5	1.77255	0.000244	up	yes	Uncharacterized protein OS=Daucus carota subsp. sativus OX=79200 GN=DCAR_020203 PE=4 SV=1	K13448	CML	GO:1901566(biological_process:organonitrogen compound biosynthetic process); GO:0044238(biological_process:primary metabolic process); GO:0044249(biological_process:cellular biosynthetic process); GO:0043229(cellular_component:intracellular organelle); GO:0043228(cellular_component:non-membrane-bounded organelle); GO:0003674(molecular_function:molecular_function); GO:0005488(molecular_function:bi…	map04626(Plant-pathogen interaction)	COG5126(D:Cell cycle control, cell division, chromosome partitioning); COG5126(T:Signal transduction mechanisms); COG5126(Z:Cytoskeleton)	PF13499.7(EF-hand_7:EF-hand domain pair); PF00036.33(EF-hand_1:EF hand); PF13405.7(EF-hand_6:EF-hand domain); PF13833.7(EF-hand_8:EF-hand domain pair); PF14658.7(EF-hand_9:EF-hand domain); PF13202.7(EF-hand_5:EF hand)	chloroplast	7	60	16.4	High
A0A175YJ21	1.83706	0.000247	up	yes	Carbonic anhydrase OS=Daucus carota subsp. sativus OX=79200 GN=DCAR_031104 PE=3 SV=1	K01673	cynT, can	GO:0043169(molecular_function:cation binding); GO:0046872(molecular_function:metal ion binding); GO:0046914(molecular_function:transition metal ion binding); GO:0016835(molecular_function:carbon-oxygen lyase activity); GO:0016829(molecular_function:lyase activity); GO:0043167(molecular_function:ion binding); GO:0003824(molecular_function:catalytic activity); GO:0015976(biological_process:carbon u…	map00910(Nitrogen metabolism)	COG0288(J:Translation, ribosomal structure and biogenesis)	PF00484.20(Pro_CA:Carbonic anhydrase)	cytoplasmic	13	68	27.4	High
A0A166E3P7	1.86365	1e-06	up	yes	Protein kinase domain-containing protein OS=Daucus carota subsp. sativus OX=79200 GN=DCAR_006885 PE=4 SV=1			GO:0080090(biological_process:regulation of primary metabolic process); GO:0019222(biological_process:regulation of metabolic process); GO:0006869(biological_process:lipid transport); GO:0035639(molecular_function:purine ribonucleoside triphosphate binding); GO:0031326(biological_process:regulation of cellular biosynthetic process); GO:0031323(biological_process:regulation of cellular metabolic p…		COG0515(S:Function unknown)	PF00069.26(Pkinase:Protein kinase domain); PF07714.18(PK_Tyr_Ser-Thr:Protein tyrosine and serine/threonine kinase)	ER	1	1	75.2	Medium
A0A161YFV4	1.74683	0.000428	up	yes	Fructose-bisphosphate aldolase OS=Daucus carota subsp. sativus OX=79200 GN=DCAR_020776 PE=3 SV=1	K01623	ALDO	GO:0009185(biological_process:ribonucleoside diphosphate metabolic process); GO:0016310(biological_process:phosphorylation); GO:0019752(biological_process:carboxylic acid metabolic process); GO:0034641(biological_process:cellular nitrogen compound metabolic process); GO:0006807(biological_process:nitrogen compound metabolic process); GO:0003674(molecular_function:molecular_function); GO:0044281(b…	map00010(Glycolysis / Gluconeogenesis); map00030(Pentose phosphate pathway); map00051(Fructose and mannose metabolism); map00710(Carbon fixation in photosynthetic organisms)	COG3588(G:Carbohydrate transport and metabolism)	PF00274.20(Glycolytic:Fructose-bisphosphate aldolase class-I)	cytoplasmic	10	74	38.3	High
A0A164Z492	1.673	0.0004	up	yes	AAA domain-containing protein OS=Daucus carota subsp. sativus OX=79200 GN=DCAR_018545 PE=3 SV=1	K03062	PSMC1, RPT2	GO:0035639(molecular_function:purine ribonucleoside triphosphate binding); GO:0006807(biological_process:nitrogen compound metabolic process); GO:0003674(molecular_function:molecular_function); GO:0005488(molecular_function:binding); GO:0008233(molecular_function:peptidase activity); GO:0043167(molecular_function:ion binding); GO:1901363(molecular_function:heterocyclic compound binding); GO:19012…	map03050(Proteasome)	COG1222(O:Posttranslational modification, protein turnover, chaperones)	PF00004.30(AAA:ATPase family associated with various cellular activities (AAA)); PF17862.2(AAA_lid_3:AAA+ lid domain); PF16450.6(Prot_ATP_ID_OB:Proteasomal ATPase OB C-terminal domain); PF13401.7(AAA_22:AAA domain)	cytoplasmic	4	54	49.2	High
A0A166FN97	1.7814	0.001045	up	yes	HABP4_PAI-RBP1 domain-containing protein OS=Daucus carota subsp. sativus OX=79200 GN=DCAR_000646 PE=4 SV=1	K13199	SERBP1	GO:0090079(molecular_function:translation regulator activity, nucleic acid binding); GO:0045182(molecular_function:translation regulator activity); GO:0097159(molecular_function:organic cyclic compound binding); GO:0008135(molecular_function:translation factor activity, RNA binding); GO:0003674(molecular_function:molecular_function); GO:0005488(molecular_function:binding); GO:0003676(molecular_fu…		ENOG410YBHR(S:Function unknown)	PF04774.16(HABP4_PAI-RBP1:Hyaluronan / mRNA binding family); PF09598.11(Stm1_N:Stm1)	cytoplasmic	3	20	39.2	High
A0A166CYY2	1.76673	3e-05	up	yes	Uncharacterized protein OS=Daucus carota subsp. sativus OX=79200 GN=DCAR_005353 PE=4 SV=1			GO:0055035(cellular_component:plastid thylakoid membrane); GO:0034357(cellular_component:photosynthetic membrane); GO:0003674(molecular_function:molecular_function); GO:0006091(biological_process:generation of precursor metabolites and energy); GO:0009773(biological_process:photosynthetic electron transport in photosystem I); GO:0031224(cellular_component:intrinsic component of membrane); GO:0016…		ENOG4111J4U(S:Function unknown)		peroxisomal	1	6	13.5	Medium
A0A166EXU1	1.72023	0.000758	up	yes	Bulb-type lectin domain-containing protein OS=Daucus carota subsp. sativus OX=79200 GN=DCAR_007947 PE=4 SV=1			GO:0008037(biological_process:cell recognition); GO:0016021(cellular_component:integral component of membrane); GO:0009987(biological_process:cellular process); GO:0005575(cellular_component:cellular_component); GO:0022414(biological_process:reproductive process); GO:0008150(biological_process:biological_process); GO:0031224(cellular_component:intrinsic component of membrane); GO:0110165(cellular…		ENOG410YGSV(S:Function unknown)	PF01453.25(B_lectin:D-mannose binding lectin)	ER	2	9	49.3	High
A0A164YK86	1.72718	8.3e-05	up	yes	Arf-GAP domain-containing protein OS=Daucus carota subsp. sativus OX=79200 GN=DCAR_017880 PE=4 SV=1	K12492	ARFGAP1	GO:0043169(molecular_function:cation binding); GO:0098772(molecular_function:molecular function regulator); GO:0030234(molecular_function:enzyme regulator activity); GO:0005096(molecular_function:GTPase activator activity); GO:0043167(molecular_function:ion binding); GO:0030695(molecular_function:GTPase regulator activity); GO:0003674(molecular_function:molecular_function); GO:0005488(molecular_f…	map04144(Endocytosis)	COG5347(E:Amino acid transport and metabolism)	PF01412.19(ArfGap:Putative GTPase activating protein for Arf)	mitochondrial	3	6	48.4	High
A0A166BUT6	1.80735	1e-05	up	yes	PKS_ER domain-containing protein OS=Daucus carota subsp. sativus OX=79200 GN=DCAR_011658 PE=3 SV=1	K23232;K00083	10HGO;CAD	GO:0005737(cellular_component:cytoplasm); GO:0043169(molecular_function:cation binding); GO:0016614(molecular_function:oxidoreductase activity, acting on CH-OH group of donors); GO:0046914(molecular_function:transition metal ion binding); GO:0016616(molecular_function:oxidoreductase activity, acting on the CH-OH group of donors, NAD or NADP as acceptor); GO:0046029(molecular_function:mannitol deh…	map00940(Phenylpropanoid biosynthesis); map00902(Monoterpenoid biosynthesis)	COG1064(C:Energy production and conversion)	PF08240.13(ADH_N:Alcohol dehydrogenase GroES-like domain); PF00107.27(ADH_zinc_N:Zinc-binding dehydrogenase); PF01262.22(AlaDh_PNT_C:Alanine dehydrogenase/PNT, C-terminal domain); PF02826.20(2-Hacid_dh_C:D-isomer specific 2-hydroxyacid dehydrogenase, NAD binding domain)	cytoplasmic	9	71	38.7	High
A0A162A1N6	1.78529	0.000217	up	yes	SRP40_C domain-containing protein OS=Daucus carota subsp. sativus OX=79200 GN=DCAR_018014 PE=4 SV=1			GO:0043232(cellular_component:intracellular non-membrane-bounded organelle); GO:0005730(cellular_component:nucleolus); GO:0005575(cellular_component:cellular_component); GO:0043229(cellular_component:intracellular organelle); GO:0043228(cellular_component:non-membrane-bounded organelle); GO:0043226(cellular_component:organelle); GO:0110165(cellular_component:cellular anatomical entity)		ENOG4111U5P(S:Function unknown)	PF05022.13(SRP40_C:SRP40, C-terminal domain)	nuclear	2	5	48.8	High
A0A164TY63	1.70202	0.03375	up	yes	Flavin-containing monooxygenase OS=Daucus carota subsp. sativus OX=79200 GN=DCAR_025223 PE=3 SV=1	K00485	FMO	GO:0043168(molecular_function:anion binding); GO:0050661(molecular_function:NADP binding); GO:0050660(molecular_function:flavin adenine dinucleotide binding); GO:0016709(molecular_function:oxidoreductase activity, acting on paired donors, with incorporation or reduction of molecular oxygen, NAD(P)H as one donor, and incorporation of one atom of oxygen); GO:0097159(molecular_function:organic cycli…		COG2072(P:Inorganic ion transport and metabolism)	PF00743.20(FMO-like:Flavin-binding monooxygenase-like); PF13738.7(Pyr_redox_3:Pyridine nucleotide-disulphide oxidoreductase); PF13450.7(NAD_binding_8:NAD(P)-binding Rossmann-like domain); PF07992.15(Pyr_redox_2:Pyridine nucleotide-disulphide oxidoreductase); PF13434.7(K_oxygenase:L-lysine 6-monooxygenase (NADPH-requiring))	extracellular	3	7	53.8	High
A0A166DAN3	1.72639	0.00014	up	yes	Peptidase A1 domain-containing protein OS=Daucus carota subsp. sativus OX=79200 GN=DCAR_005849 PE=4 SV=1			GO:0004175(molecular_function:endopeptidase activity); GO:0006807(biological_process:nitrogen compound metabolic process); GO:0003674(molecular_function:molecular_function); GO:0008233(molecular_function:peptidase activity); GO:0031224(cellular_component:intrinsic component of membrane); GO:1901575(biological_process:organic substance catabolic process); GO:0016021(cellular_component:integral com…		ENOG410XNV7(U:Intracellular trafficking, secretion, and vesicular transport)	PF14541.7(TAXi_C:Xylanase inhibitor C-terminal); PF14543.7(TAXi_N:Xylanase inhibitor N-terminal)	extracellular	5	17	43.4	High
A0A175YM79	1.63406	0.000154	up	yes	Katanin p80 WD40 repeat-containing subunit B1 homolog OS=Daucus carota subsp. sativus OX=79200 GN=DCAR_028121 PE=3 SV=1	K18643	KATNB1	GO:0099512(cellular_component:supramolecular fiber); GO:0099513(cellular_component:polymeric cytoskeletal fiber); GO:0003674(molecular_function:molecular_function); GO:0005488(molecular_function:binding); GO:0008352(cellular_component:katanin complex); GO:0005874(cellular_component:microtubule); GO:0005875(cellular_component:microtubule associated complex); GO:0071840(biological_process:cellular …		ENOG410XQAC(K:Transcription)	PF13925.7(Katanin_con80:con80 domain of Katanin); PF00400.33(WD40:WD domain, G-beta repeat); PF12894.8(ANAPC4_WD40:Anaphase-promoting complex subunit 4 WD40 domain)	cytoplasmic	1	1	113.6	Medium
A0A161ZT95	1.73875	0.00023	up	yes	Nop domain-containing protein OS=Daucus carota subsp. sativus OX=79200 GN=DCAR_021613 PE=3 SV=1	K14564	NOP56		map03008(Ribosome biogenesis in eukaryotes)	COG1498(J:Translation, ribosomal structure and biogenesis)	PF01798.19(Nop:snoRNA binding domain, fibrillarin); PF08156.14(NOP5NT:NOP5NT (NUC127) domain)	chloroplast	3	23	61.6	High
A0A161ZQF7	1.60521	0.001936	up	yes	SKP1-like protein OS=Daucus carota subsp. sativus OX=79200 GN=DCAR_022815 PE=3 SV=1	K03094	SKP1, CBF3D	GO:0044248(biological_process:cellular catabolic process); GO:0043229(cellular_component:intracellular organelle); GO:0006807(biological_process:nitrogen compound metabolic process); GO:0003674(molecular_function:molecular_function); GO:0005488(molecular_function:binding); GO:0043632(biological_process:modification-dependent macromolecule catabolic process); GO:0043227(cellular_component:membrane…	map04120(Ubiquitin mediated proteolysis); map04141(Protein processing in endoplasmic reticulum)	COG5201(O:Posttranslational modification, protein turnover, chaperones)	PF01466.20(Skp1:Skp1 family, dimerisation domain); PF03931.16(Skp1_POZ:Skp1 family, tetramerisation domain)	chloroplast	5	71	17.7	High
A0A164SL33	1.75814	0.001581	up	yes	Uncharacterized protein OS=Daucus carota subsp. sativus OX=79200 GN=DCAR_023402 PE=3 SV=1			GO:0071704(biological_process:organic substance metabolic process); GO:0016787(molecular_function:hydrolase activity); GO:0006629(biological_process:lipid metabolic process); GO:0044238(biological_process:primary metabolic process); GO:0016788(molecular_function:hydrolase activity, acting on ester bonds); GO:0003824(molecular_function:catalytic activity); GO:0003674(molecular_function:molecular_f…		COG3240(S:Function unknown)	PF00657.23(Lipase_GDSL:GDSL-like Lipase/Acylhydrolase)	extracellular	10	29	40.1	High
A0A166EMX6	1.7636	0.001008	up	yes	Ubiquitin carboxyl-terminal hydrolase OS=Daucus carota subsp. sativus OX=79200 GN=DCAR_007611 PE=3 SV=1	K11843	USP14, UBP6	GO:0008234(molecular_function:cysteine-type peptidase activity); GO:0101005(molecular_function:ubiquitinyl hydrolase activity); GO:0044248(biological_process:cellular catabolic process); GO:0043229(cellular_component:intracellular organelle); GO:0006807(biological_process:nitrogen compound metabolic process); GO:0003674(molecular_function:molecular_function); GO:0043632(biological_process:modific…		ENOG410XP96(O:Posttranslational modification, protein turnover, chaperones)	PF00443.30(UCH:Ubiquitin carboxyl-terminal hydrolase); PF13423.7(UCH_1:Ubiquitin carboxyl-terminal hydrolase); PF00240.24(ubiquitin:Ubiquitin family)	ER	2	21	55.6	High
A0A162A3B1	1.69075	0.000552	up	yes	RING-CH-type domain-containing protein OS=Daucus carota subsp. sativus OX=79200 GN=DCAR_018814 PE=4 SV=1			GO:0005488(molecular_function:binding); GO:0043169(molecular_function:cation binding); GO:0046914(molecular_function:transition metal ion binding); GO:0016021(cellular_component:integral component of membrane); GO:0043167(molecular_function:ion binding); GO:0005575(cellular_component:cellular_component); GO:0003824(molecular_function:catalytic activity); GO:0003674(molecular_function:molecular_fu…		COG5183(O:Posttranslational modification, protein turnover, chaperones)	PF12906.8(RINGv:RING-variant domain)	cytoplasmic	1	2	54.9	Medium
A0A166FG15	1.97655	0.001097	up	yes	K-box domain-containing protein OS=Daucus carota subsp. sativus OX=79200 GN=DCAR_008577 PE=4 SV=1	K09264	K09264	GO:1903508(biological_process:positive regulation of nucleic acid-templated transcription); GO:0051252(biological_process:regulation of RNA metabolic process); GO:0080090(biological_process:regulation of primary metabolic process); GO:0019222(biological_process:regulation of metabolic process); GO:0031328(biological_process:positive regulation of cellular biosynthetic process); GO:0031326(biologi…		COG5068(K:Transcription)	PF01486.18(K-box:K-box region)	nuclear	1	4	21.2	Medium
A0A164ZCA2	1.73431	1.1e-05	up	yes	EF1_GNE domain-containing protein OS=Daucus carota subsp. sativus OX=79200 GN=DCAR_018945 PE=3 SV=1	K03232	EEF1B	GO:0008152(biological_process:metabolic process); GO:0005085(molecular_function:guanyl-nucleotide exchange factor activity); GO:0019899(molecular_function:enzyme binding); GO:0044249(biological_process:cellular biosynthetic process); GO:0051020(molecular_function:GTPase binding); GO:0003674(molecular_function:molecular_function); GO:0005488(molecular_function:binding); GO:0034645(biological_proce…		COG2092(G:Carbohydrate transport and metabolism)	PF00736.20(EF1_GNE:EF-1 guanine nucleotide exchange domain)	peroxisomal	7	56	24.2	High
A0A166FRM4	1.72941	0.000349	up	yes	Malic enzyme OS=Daucus carota subsp. sativus OX=79200 GN=DCAR_000763 PE=3 SV=1	K00029	E1.1.1.40, maeB	GO:0043231(cellular_component:intracellular membrane-bounded organelle); GO:0006436(biological_process:tryptophanyl-tRNA aminoacylation); GO:0035639(molecular_function:purine ribonucleoside triphosphate binding); GO:0051287(molecular_function:NAD binding); GO:0019752(biological_process:carboxylic acid metabolic process); GO:0016615(molecular_function:malate dehydrogenase activity); GO:0090304(bio…	map00620(Pyruvate metabolism); map00710(Carbon fixation in photosynthetic organisms)	COG0281(G:Carbohydrate transport and metabolism)	PF03949.16(Malic_M:Malic enzyme, NAD binding domain); PF00390.20(malic:Malic enzyme, N-terminal domain)	chloroplast	11	40	63.6	High
A0A161WQT0	1.78983	0.01496	up	yes	AAI domain-containing protein OS=Daucus carota subsp. sativus OX=79200 GN=DCAR_009799 PE=3 SV=1			GO:0006869(biological_process:lipid transport); GO:0006810(biological_process:transport); GO:0008289(molecular_function:lipid binding); GO:0003674(molecular_function:molecular_function); GO:0005488(molecular_function:binding); GO:0071702(biological_process:organic substance transport); GO:0008150(biological_process:biological_process); GO:0051234(biological_process:establishment of localization);…		ENOG410YWBC(U:Intracellular trafficking, secretion, and vesicular transport)		extracellular	4	36	11.1	High
A0A161ZNZ6	1.68015	0.001404	up	yes	N6-L-threonylcarbamoyladenine synthase OS=Daucus carota subsp. sativus OX=79200 GN=DCAR_026317 PE=4 SV=1	K01409	KAE1, tsaD, QRI7	GO:0061711(molecular_function:N(6)-L-threonylcarbamoyladenine synthase); GO:0009451(biological_process:RNA modification); GO:0090304(biological_process:nucleic acid metabolic process); GO:0034641(biological_process:cellular nitrogen compound metabolic process); GO:0006807(biological_process:nitrogen compound metabolic process); GO:0003674(molecular_function:molecular_function); GO:0005488(molecul…		COG0533(O:Posttranslational modification, protein turnover, chaperones)	PF00814.26(TsaD:tRNA N6-adenosine threonylcarbamoyltransferase)	cytoplasmic	3	18	26.4	High
A0A161Y4M2	1.92279	4.1e-05	up	yes	Beta-amylase OS=Daucus carota subsp. sativus OX=79200 GN=DCAR_024303 PE=3 SV=1	K01177	E3.2.1.2	GO:0071704(biological_process:organic substance metabolic process); GO:0016787(molecular_function:hydrolase activity); GO:1901575(biological_process:organic substance catabolic process); GO:0044238(biological_process:primary metabolic process); GO:0005975(biological_process:carbohydrate metabolic process); GO:0005976(biological_process:polysaccharide metabolic process); GO:0016160(molecular_funct…	map00500(Starch and sucrose metabolism)	ENOG410XRH5(S:Function unknown)	PF01373.18(Glyco_hydro_14:Glycosyl hydrolase family 14)	chloroplast	2	4	63	High
A0A166EKP7	1.65517	0.0285	up	yes	Uncharacterized protein OS=Daucus carota subsp. sativus OX=79200 GN=DCAR_007533 PE=4 SV=1					ENOG410Z7Z7(S:Function unknown)	PF14559.7(TPR_19:Tetratricopeptide repeat)	cytoplasmic	2	5	67.8	High
A0A164U851	1.77477	0.000655	up	yes	Uncharacterized protein OS=Daucus carota subsp. sativus OX=79200 GN=DCAR_025633 PE=3 SV=1	K08054	CANX	GO:0005488(molecular_function:binding); GO:0006457(biological_process:protein folding); GO:0005783(cellular_component:endoplasmic reticulum); GO:0005789(cellular_component:endoplasmic reticulum membrane); GO:0043229(cellular_component:intracellular organelle); GO:0003674(molecular_function:molecular_function); GO:0007165(biological_process:signal transduction); GO:0043167(molecular_function:ion b…	map04145(Phagosome); map04141(Protein processing in endoplasmic reticulum)	ENOG410XP7T(U:Intracellular trafficking, secretion, and vesicular transport)	PF00262.19(Calreticulin:Calreticulin family)	ER	7	20	45.6	High
A0A164SR49	1.8031	1.3e-05	up	yes	Cysteinyl-tRNA synthetase OS=Daucus carota subsp. sativus OX=79200 GN=DCAR_023645 PE=3 SV=1	K01883	CARS, cysS	GO:0035639(molecular_function:purine ribonucleoside triphosphate binding); GO:0019752(biological_process:carboxylic acid metabolic process); GO:0090304(biological_process:nucleic acid metabolic process); GO:0034641(biological_process:cellular nitrogen compound metabolic process); GO:0006807(biological_process:nitrogen compound metabolic process); GO:0003674(molecular_function:molecular_function);…	map00970(Aminoacyl-tRNA biosynthesis)	COG0215(J:Translation, ribosomal structure and biogenesis)	PF01406.20(tRNA-synt_1e:tRNA synthetases class I (C) catalytic domain); PF09334.12(tRNA-synt_1g:tRNA synthetases class I (M))	cytoplasmic	8	18	63.7	High
A0A175YJ85	1.69193	0.001177	up	yes	Urea amidohydrolase OS=Daucus carota subsp. sativus OX=79200 GN=DCAR_031184 PE=3 SV=1	K01427	URE	GO:0016151(molecular_function:nickel cation binding); GO:0071941(biological_process:nitrogen cycle metabolic process); GO:0016787(molecular_function:hydrolase activity); GO:0044248(biological_process:cellular catabolic process); GO:0034641(biological_process:cellular nitrogen compound metabolic process); GO:0006807(biological_process:nitrogen compound metabolic process); GO:0003674(molecular_func…	map00220(Arginine biosynthesis); map00230(Purine metabolism)	COG0804(E:Amino acid transport and metabolism)	PF01979.21(Amidohydro_1:Amidohydrolase family); PF00449.21(Urease_alpha:Urease alpha-subunit, N-terminal domain); PF00547.19(Urease_gamma:Urease, gamma subunit); PF00699.21(Urease_beta:Urease beta subunit); PF07969.12(Amidohydro_3:Amidohydrolase family)	cytoplasmic	1	2	98.5	High
A0A162AC45	1.81062	0.000192	up	yes	S5 DRBM domain-containing protein OS=Daucus carota subsp. sativus OX=79200 GN=DCAR_013596 PE=3 SV=1	K02981	RP-S2e, RPS2	GO:0044238(biological_process:primary metabolic process); GO:0015935(cellular_component:small ribosomal subunit); GO:0044249(biological_process:cellular biosynthetic process); GO:0034641(biological_process:cellular nitrogen compound metabolic process); GO:0006807(biological_process:nitrogen compound metabolic process); GO:0003674(molecular_function:molecular_function); GO:0005488(molecular_functi…	map03010(Ribosome)	COG0098(P:Inorganic ion transport and metabolism)	PF00333.21(Ribosomal_S5:Ribosomal protein S5, N-terminal domain); PF03719.16(Ribosomal_S5_C:Ribosomal protein S5, C-terminal domain)	chloroplast	8	64	29.7	High
A0A164ZR13	1.89867	0.001844	up	yes	Uncharacterized protein OS=Daucus carota subsp. sativus OX=79200 GN=DCAR_019516 PE=3 SV=1	K14999	CYP6	GO:0043169(molecular_function:cation binding); GO:0004497(molecular_function:monooxygenase activity); GO:0020037(molecular_function:heme binding); GO:0046914(molecular_function:transition metal ion binding); GO:0046906(molecular_function:tetrapyrrole binding); GO:0097159(molecular_function:organic cyclic compound binding); GO:0016021(cellular_component:integral component of membrane); GO:0016705(…		COG2124(J:Translation, ribosomal structure and biogenesis)	PF00067.23(p450:Cytochrome P450)	extracellular	1	1	99.4	High
A0A164Z613	1.73836	0.001669	up	yes	Uncharacterized protein OS=Daucus carota subsp. sativus OX=79200 GN=DCAR_018635 PE=4 SV=1	K17265	G3BP1	GO:0097159(molecular_function:organic cyclic compound binding); GO:0003674(molecular_function:molecular_function); GO:0005488(molecular_function:binding); GO:0003676(molecular_function:nucleic acid binding); GO:1901363(molecular_function:heterocyclic compound binding); GO:0003723(molecular_function:RNA binding)		ENOG410YV57(S:Function unknown)	PF02136.21(NTF2:Nuclear transport factor 2 (NTF2) domain); PF00076.23(RRM_1:RNA recognition motif. (a.k.a. RRM, RBD, or RNP domain))	cytoplasmic	1	3	53.2	High
A0A166G7F7	1.78406	2e-06	up	yes	Protein arginine N-methyltransferase OS=Daucus carota subsp. sativus OX=79200 GN=DCAR_001159 PE=3 SV=1	K02516	PRMT5, HSL7	GO:0006479(biological_process:protein methylation); GO:0016274(molecular_function:protein-arginine N-methyltransferase activity); GO:0042054(molecular_function:histone methyltransferase activity); GO:0009889(biological_process:regulation of biosynthetic process); GO:0016273(molecular_function:arginine N-methyltransferase activity); GO:0019222(biological_process:regulation of metabolic process); G…	map03013(RNA transport)	ENOG410XNZM(S:Function unknown)	PF17285.3(PRMT5_TIM:PRMT5 TIM barrel domain); PF05185.17(PRMT5:PRMT5 arginine-N-methyltransferase); PF17286.3(PRMT5_C:PRMT5 oligomerisation domain)	nuclear	8	17	73.3	High
A0A175YQ36	1.79023	0.000809	up	yes	TPR_REGION domain-containing protein OS=Daucus carota subsp. sativus OX=79200 GN=DCAR_027350 PE=4 SV=1			GO:0090304(biological_process:nucleic acid metabolic process); GO:0034641(biological_process:cellular nitrogen compound metabolic process); GO:0006807(biological_process:nitrogen compound metabolic process); GO:0003674(molecular_function:molecular_function); GO:0031224(cellular_component:intrinsic component of membrane); GO:0006139(biological_process:nucleobase-containing compound metabolic proce…		ENOG4111QPT(S:Function unknown); ENOG410YM19(S:Function unknown)	PF14559.7(TPR_19:Tetratricopeptide repeat); PF13431.7(TPR_17:Tetratricopeptide repeat); PF13428.7(TPR_14:Tetratricopeptide repeat)	cytoplasmic	1	2	42.4	High
A0A165ZNI0	1.77643	0.000124	up	yes	Uncharacterized protein OS=Daucus carota subsp. sativus OX=79200 GN=DCAR_008999 PE=3 SV=1	K02873	RP-L13e, RPL13	GO:0044238(biological_process:primary metabolic process); GO:0015934(cellular_component:large ribosomal subunit); GO:0003676(molecular_function:nucleic acid binding); GO:0022625(cellular_component:cytosolic large ribosomal subunit); GO:0043232(cellular_component:intracellular non-membrane-bounded organelle); GO:0043226(cellular_component:organelle); GO:0044249(biological_process:cellular biosynth…	map03010(Ribosome)	COG4352(J:Translation, ribosomal structure and biogenesis)	PF01294.19(Ribosomal_L13e:Ribosomal protein L13e)	chloroplast	2	49	23.7	High
A0A166IPR8	1.76808	3e-06	up	yes	Inhibitor_I29 domain-containing protein OS=Daucus carota subsp. sativus OX=79200 GN=DCAR_004011 PE=3 SV=1			GO:0005575(cellular_component:cellular_component); GO:0016787(molecular_function:hydrolase activity); GO:0015318(molecular_function:inorganic solute uptake transmembrane transporter activity); GO:0005215(molecular_function:transporter activity); GO:0005216(molecular_function:ion channel activity); GO:0140096(molecular_function:catalytic activity, acting on a protein); GO:0008234(molecular_functio…		COG4870(J:Translation, ribosomal structure and biogenesis)	PF08246.13(Inhibitor_I29:Cathepsin propeptide inhibitor domain (I29)); PF00112.24(Peptidase_C1:Papain family cysteine protease)	ER	1	4	20	Medium
A0A175YJ52	1.64108	0.01064	up	yes	MPN domain-containing protein OS=Daucus carota subsp. sativus OX=79200 GN=DCAR_028822 PE=3 SV=1	K03038	PSMD7, RPN8	GO:0004252(molecular_function:serine-type endopeptidase activity); GO:0004175(molecular_function:endopeptidase activity); GO:0044248(biological_process:cellular catabolic process); GO:0006807(biological_process:nitrogen compound metabolic process); GO:0003674(molecular_function:molecular_function); GO:0000502(cellular_component:proteasome complex); GO:0043632(biological_process:modification-depen…	map03050(Proteasome)	COG1310(S:Function unknown)	PF13012.7(MitMem_reg:Maintenance of mitochondrial structure and function); PF01398.22(JAB:JAB1/Mov34/MPN/PAD-1 ubiquitin protease)	chloroplast	6	46	35	High
A0A175YGS5	1.72206	1.8e-05	up	yes	Clustered mitochondria protein homolog OS=Daucus carota subsp. sativus OX=79200 GN=DCAR_029635 PE=3 SV=1	K03255	TIF31, CLU1	GO:0048312(biological_process:intracellular distribution of mitochondria); GO:0006996(biological_process:organelle organization); GO:0003674(molecular_function:molecular_function); GO:0048311(biological_process:mitochondrion distribution); GO:0110165(cellular_component:cellular anatomical entity); GO:0097159(molecular_function:organic cyclic compound binding); GO:0009987(biological_process:cellul…		ENOG410XQUQ(S:Function unknown)	PF13236.7(CLU:Clustered mitochondria); PF12807.8(eIF3_p135:Translation initiation factor eIF3 subunit 135); PF13424.7(TPR_12:Tetratricopeptide repeat); PF13374.7(TPR_10:Tetratricopeptide repeat); PF15044.7(CLU_N:Mitochondrial function, CLU-N-term)	cytoplasmic	15	9	159.8	High
A0A175YJ25	1.63254	0.000232	up	yes	Uncharacterized protein OS=Daucus carota subsp. sativus OX=79200 GN=DCAR_028852 PE=3 SV=1			GO:0042393(molecular_function:histone binding); GO:0080090(biological_process:regulation of primary metabolic process); GO:0019222(biological_process:regulation of metabolic process); GO:0031326(biological_process:regulation of cellular biosynthetic process); GO:0031323(biological_process:regulation of cellular metabolic process); GO:0043226(cellular_component:organelle); GO:0043229(cellular_comp…		ENOG410YG6P(S:Function unknown); ENOG410YBB5(S:Function unknown)	PF12165.9(Alfin:Alfin); PF14379.7(Myb_CC_LHEQLE:MYB-CC type transfactor, LHEQLE motif); PF00249.32(Myb_DNA-binding:Myb-like DNA-binding domain)	nuclear	1	2	55.7	High
A0A164U8K7	1.71739	0.000331	up	yes	Diadenosine tetraphosphate synthetase OS=Daucus carota subsp. sativus OX=79200 GN=DCAR_025646 PE=3 SV=1	K01880	GARS, glyS1	GO:0035639(molecular_function:purine ribonucleoside triphosphate binding); GO:0019752(biological_process:carboxylic acid metabolic process); GO:0090304(biological_process:nucleic acid metabolic process); GO:0034641(biological_process:cellular nitrogen compound metabolic process); GO:0006807(biological_process:nitrogen compound metabolic process); GO:0003674(molecular_function:molecular_function);…	map00970(Aminoacyl-tRNA biosynthesis)	COG0423(J:Translation, ribosomal structure and biogenesis)	PF03129.21(HGTP_anticodon:Anticodon binding domain); PF00587.26(tRNA-synt_2b:tRNA synthetase class II core domain (G, H, P, S and T))	chloroplast	16	42	70.5	High
A0A164TL65	1.55102	0.005616	up	yes	Sucrose synthase OS=Daucus carota subsp. sativus OX=79200 GN=DCAR_024777 PE=3 SV=1	K00695	E2.4.1.13	GO:0044238(biological_process:primary metabolic process); GO:0016157(molecular_function:sucrose synthase activity); GO:0008152(biological_process:metabolic process); GO:0071704(biological_process:organic substance metabolic process); GO:0009311(biological_process:oligosaccharide metabolic process); GO:0035251(molecular_function:UDP-glucosyltransferase activity); GO:0009987(biological_process:cell…	map00500(Starch and sucrose metabolism)	COG0438(M:Cell wall/membrane/envelope biogenesis)	PF00862.20(Sucrose_synth:Sucrose synthase); PF00534.21(Glycos_transf_1:Glycosyl transferases group 1); PF13692.7(Glyco_trans_1_4:Glycosyl transferases group 1)	cytoplasmic	2	25	92.6	High
A0A169WBM9	1.64073	0.000304	up	yes	Ribosome production factor 2 homolog OS=Daucus carota subsp. sativus OX=79200 GN=DCAR_010653 PE=3 SV=1	K14847	RPF2	GO:0022607(biological_process:cellular component assembly); GO:0043933(biological_process:macromolecular complex subunit organization); GO:0034622(biological_process:cellular macromolecular complex assembly); GO:0090304(biological_process:nucleic acid metabolic process); GO:0034641(biological_process:cellular nitrogen compound metabolic process); GO:0006807(biological_process:nitrogen compound me…		COG5106(S:Function unknown)	PF04427.19(Brix:Brix domain)	cytoplasmic	3	16	35.8	High
A0A175YHY4	1.61773	0.000562	up	yes	Methyltransferase OS=Daucus carota subsp. sativus OX=79200 GN=DCAR_030748 PE=3 SV=1			GO:0008150(biological_process:biological_process); GO:0016021(cellular_component:integral component of membrane); GO:0005575(cellular_component:cellular_component); GO:0003824(molecular_function:catalytic activity); GO:0016740(molecular_function:transferase activity); GO:0016741(molecular_function:transferase activity, transferring one-carbon groups); GO:0003674(molecular_function:molecular_funct…		ENOG410YDXK(S:Function unknown)	PF03141.17(Methyltransf_29:Putative S-adenosyl-L-methionine-dependent methyltransferase); PF08241.13(Methyltransf_11:Methyltransferase domain); PF13649.7(Methyltransf_25:Methyltransferase domain)	Golgi apparatus	2	10	69.8	High
A0A166JA32	1.58326	0.004621	up	yes	Oleosin OS=Daucus carota subsp. sativus OX=79200 GN=DCAR_004605 PE=3 SV=1			GO:0043232(cellular_component:intracellular non-membrane-bounded organelle); GO:0016021(cellular_component:integral component of membrane); GO:0005811(cellular_component:lipid particle); GO:0051179(biological_process:localization); GO:0005575(cellular_component:cellular_component); GO:0043229(cellular_component:intracellular organelle); GO:0043228(cellular_component:non-membrane-bounded organelle…		ENOG410YP7Y(S:Function unknown)	PF01277.18(Oleosin:Oleosin)	Golgi apparatus	2	10	14.4	High
A0A166AHI0	1.66052	0.00775	up	yes	Ribosomal_L2_C domain-containing protein OS=Daucus carota subsp. sativus OX=79200 GN=DCAR_010010 PE=3 SV=1	K02938	RP-L8e, RPL8	GO:0044238(biological_process:primary metabolic process); GO:0015934(cellular_component:large ribosomal subunit); GO:0003676(molecular_function:nucleic acid binding); GO:0043226(cellular_component:organelle); GO:0044249(biological_process:cellular biosynthetic process); GO:0043229(cellular_component:intracellular organelle); GO:0043228(cellular_component:non-membrane-bounded organelle); GO:000367…	map03010(Ribosome)	COG0090(J:Translation, ribosomal structure and biogenesis)	PF03947.19(Ribosomal_L2_C:Ribosomal Proteins L2, C-terminal domain); PF00181.24(Ribosomal_L2:Ribosomal Proteins L2, RNA binding domain)	chloroplast	3	69	27.9	High
A0A164U7Z3	1.68169	0.002144	up	yes	Uncharacterized protein OS=Daucus carota subsp. sativus OX=79200 GN=DCAR_025630 PE=4 SV=1	K15979	SND1	GO:0009892(biological_process:negative regulation of metabolic process); GO:0019222(biological_process:regulation of metabolic process); GO:0010629(biological_process:negative regulation of gene expression); GO:0003674(molecular_function:molecular_function); GO:0005488(molecular_function:binding); GO:0050789(biological_process:regulation of biological process); GO:0005737(cellular_component:cytop…		COG1525(L:Replication, recombination and repair)	PF00565.18(SNase:Staphylococcal nuclease homologue); PF00567.25(TUDOR:Tudor domain)	nuclear	35	39	161.9	High
A0A166C3W2	1.80588	0.002088	up	yes	Uncharacterized protein OS=Daucus carota subsp. sativus OX=79200 GN=DCAR_012007 PE=3 SV=1	K02910	RP-L31e, RPL31	GO:0044238(biological_process:primary metabolic process); GO:0015934(cellular_component:large ribosomal subunit); GO:0022625(cellular_component:cytosolic large ribosomal subunit); GO:0043232(cellular_component:intracellular non-membrane-bounded organelle); GO:0044249(biological_process:cellular biosynthetic process); GO:0034641(biological_process:cellular nitrogen compound metabolic process); GO:…	map03010(Ribosome)	COG2097(J:Translation, ribosomal structure and biogenesis)	PF01198.20(Ribosomal_L31e:Ribosomal protein L31e)	chloroplast	2	34	13.8	High
A0A161X7K6	1.61914	0.001688	up	yes	Uncharacterized protein OS=Daucus carota subsp. sativus OX=79200 GN=DCAR_025528 PE=4 SV=1			GO:0009889(biological_process:regulation of biosynthetic process); GO:0080090(biological_process:regulation of primary metabolic process); GO:0019222(biological_process:regulation of metabolic process); GO:0060255(biological_process:regulation of macromolecule metabolic process); GO:0031326(biological_process:regulation of cellular biosynthetic process); GO:0031323(biological_process:regulation o…		ENOG41101DA(S:Function unknown)	PF00400.33(WD40:WD domain, G-beta repeat)	cytoplasmic	1	4	126.1	High
A0A169WRC6	1.65986	0.000109	up	yes	Isoleucyl-tRNA synthetase OS=Daucus carota subsp. sativus OX=79200 GN=DCAR_002465 PE=3 SV=1	K01870	IARS, ileS	GO:0002161(molecular_function:aminoacyl-tRNA editing activity); GO:0035639(molecular_function:purine ribonucleoside triphosphate binding); GO:0019752(biological_process:carboxylic acid metabolic process); GO:0090304(biological_process:nucleic acid metabolic process); GO:0034641(biological_process:cellular nitrogen compound metabolic process); GO:0006807(biological_process:nitrogen compound metabo…	map00970(Aminoacyl-tRNA biosynthesis)	COG0060(J:Translation, ribosomal structure and biogenesis)	PF00133.23(tRNA-synt_1:tRNA synthetases class I (I, L, M and V)); PF08264.14(Anticodon_1:Anticodon-binding domain of tRNA ligase); PF09334.12(tRNA-synt_1g:tRNA synthetases class I (M)); PF13603.7(tRNA-synt_1_2:Leucyl-tRNA synthetase, Domain 2)	chloroplast	2	1	126.3	High
A0A166E3Q5	1.58601	8.9e-05	up	yes	Uncharacterized protein OS=Daucus carota subsp. sativus OX=79200 GN=DCAR_006887 PE=3 SV=1	K02942	RP-LP1, RPLP1	GO:0044249(biological_process:cellular biosynthetic process); GO:0043229(cellular_component:intracellular organelle); GO:0043228(cellular_component:non-membrane-bounded organelle); GO:0003674(molecular_function:molecular_function); GO:0034645(biological_process:cellular macromolecule biosynthetic process); GO:0043226(cellular_component:organelle); GO:1901576(biological_process:organic substance b…	map03010(Ribosome)	COG2058(J:Translation, ribosomal structure and biogenesis)	PF00428.20(Ribosomal_60s:60s Acidic ribosomal protein)	cytoplasmic	2	61	11.3	High
A0A165YT46	1.96253	0.000414	up	yes	Uncharacterized protein OS=Daucus carota subsp. sativus OX=79200 GN=DCAR_013425 PE=3 SV=1	K02962	RP-S17e, RPS17	GO:0044238(biological_process:primary metabolic process); GO:0043232(cellular_component:intracellular non-membrane-bounded organelle); GO:0044249(biological_process:cellular biosynthetic process); GO:0034641(biological_process:cellular nitrogen compound metabolic process); GO:0006807(biological_process:nitrogen compound metabolic process); GO:0003674(molecular_function:molecular_function); GO:003…	map03010(Ribosome)	COG1383(U:Intracellular trafficking, secretion, and vesicular transport)	PF00833.19(Ribosomal_S17e:Ribosomal S17)	mitochondrial	1	48	16.6	High
A0A175YP12	1.69694	0.000167	up	yes	Uncharacterized protein OS=Daucus carota subsp. sativus OX=79200 GN=DCAR_027375 PE=3 SV=1	K07513	ACAA1	GO:0034440(biological_process:lipid oxidation); GO:0048584(biological_process:positive regulation of response to stimulus); GO:0048583(biological_process:regulation of response to stimulus); GO:0010124(biological_process:phenylacetate catabolic process); GO:0044281(biological_process:small molecule metabolic process); GO:0044282(biological_process:small molecule catabolic process); GO:0071840(bio…	map04146(Peroxisome); map00592(alpha-Linolenic acid metabolism); map00280(Valine, leucine and isoleucine degradation); map01040(Biosynthesis of unsaturated fatty acids); map00071(Fatty acid degradation)	COG0183(I:Lipid transport and metabolism)	PF00108.24(Thiolase_N:Thiolase, N-terminal domain); PF02803.19(Thiolase_C:Thiolase, C-terminal domain)	chloroplast	21	62	45.8	High
A0A162BAD4	1.65759	0.001364	up	yes	PCI domain-containing protein OS=Daucus carota subsp. sativus OX=79200 GN=DCAR_004589 PE=3 SV=1	K03039	PSMD13, RPN9	GO:0022607(biological_process:cellular component assembly); GO:0043933(biological_process:macromolecular complex subunit organization); GO:0044248(biological_process:cellular catabolic process); GO:0043229(cellular_component:intracellular organelle); GO:0006807(biological_process:nitrogen compound metabolic process); GO:0003674(molecular_function:molecular_function); GO:0043248(biological_process…	map03050(Proteasome)	ENOG410XPG9(O:Posttranslational modification, protein turnover, chaperones)	PF01399.28(PCI:PCI domain)	nuclear	3	25	48.5	High
A0A164VH11	1.66342	0.000244	up	yes	LEA_2 domain-containing protein OS=Daucus carota subsp. sativus OX=79200 GN=DCAR_022307 PE=4 SV=1			GO:0016021(cellular_component:integral component of membrane); GO:0070161(cellular_component:anchoring junction); GO:0005575(cellular_component:cellular_component); GO:0046658(cellular_component:anchored component of plasma membrane); GO:0030054(cellular_component:cell junction); GO:0031224(cellular_component:intrinsic component of membrane); GO:0005911(cellular_component:cell-cell junction); GO:…		ENOG410YH2V(S:Function unknown)	PF03168.14(LEA_2:Late embryogenesis abundant protein)	Golgi apparatus	3	18	27.3	High
A0A165YG67	1.5721	0.008069	up	yes	Guanylate kinase OS=Daucus carota subsp. sativus OX=79200 GN=DCAR_013589 PE=3 SV=1	K00942	E2.7.4.8, gmk	GO:0019205(molecular_function:nucleobase-containing compound kinase activity); GO:0016772(molecular_function:transferase activity, transferring phosphorus-containing groups); GO:0005829(cellular_component:cytosol); GO:0016301(molecular_function:kinase activity); GO:0004385(molecular_function:guanylate kinase activity); GO:0016776(molecular_function:phosphotransferase activity, phosphate group as …	map00230(Purine metabolism)	COG0194(S:Function unknown)	PF00625.22(Guanylate_kin:Guanylate kinase)	extracellular	2	5	45.3	High
A0A164VWE5	1.94136	0.002282	up	yes	Uncharacterized protein OS=Daucus carota subsp. sativus OX=79200 GN=DCAR_021678 PE=4 SV=1			GO:0015931(biological_process:nucleobase-containing compound transport); GO:0051169(biological_process:nuclear transport); GO:0022607(biological_process:cellular component assembly); GO:0043933(biological_process:macromolecular complex subunit organization); GO:0051168(biological_process:nuclear export); GO:0043248(biological_process:proteasome assembly); GO:0034622(biological_process:cellular ma…			PF05160.14(DSS1_SEM1:DSS1/SEM1 family)	cytoplasmic	1	4	20.2	Medium
A0A164VY84	1.60803	0.000243	up	yes	UDP-glycosyltransferase OS=Daucus carota subsp. sativus OX=79200 GN=DCAR_021607 PE=4 SV=1			GO:0016021(cellular_component:integral component of membrane); GO:0005575(cellular_component:cellular_component); GO:0003824(molecular_function:catalytic activity); GO:0016740(molecular_function:transferase activity); GO:0003674(molecular_function:molecular_function); GO:0110165(cellular_component:cellular anatomical entity); GO:0016757(molecular_function:transferase activity, transferring glycos…		COG1819(S:Function unknown)	PF00201.19(UDPGT:UDP-glucoronosyl and UDP-glucosyl transferase)	cytoplasmic	2	21	53.2	High
A0A164Y7Q7	1.69565	0.000123	up	yes	GDP-mannose 4,6-dehydratase OS=Daucus carota subsp. sativus OX=79200 GN=DCAR_017348 PE=3 SV=1	K01711	gmd, GMDS	GO:0019673(biological_process:GDP-mannose metabolic process); GO:0046368(biological_process:GDP-L-fucose metabolic process); GO:0044249(biological_process:cellular biosynthetic process); GO:0034641(biological_process:cellular nitrogen compound metabolic process); GO:0006807(biological_process:nitrogen compound metabolic process); GO:0003674(molecular_function:molecular_function); GO:0044281(biolo…	map00520(Amino sugar and nucleotide sugar metabolism); map00051(Fructose and mannose metabolism)	COG1089(M:Cell wall/membrane/envelope biogenesis)	PF16363.6(GDP_Man_Dehyd:GDP-mannose 4,6 dehydratase); PF01370.22(Epimerase:NAD dependent epimerase/dehydratase family)	cytoplasmic	10	31	32.9	High
A0A166H1D2	1.69832	4.9e-05	up	yes	Tubulin-specific chaperone A OS=Daucus carota subsp. sativus OX=79200 GN=DCAR_002257 PE=3 SV=1	K17292	TBCA	GO:0022607(biological_process:cellular component assembly); GO:0006457(biological_process:protein folding); GO:0099513(cellular_component:polymeric cytoskeletal fiber); GO:0016787(molecular_function:hydrolase activity); GO:0043933(biological_process:macromolecular complex subunit organization); GO:0048487(molecular_function:beta-tubulin binding); GO:0003674(molecular_function:molecular_function);…		ENOG4111Y9A(S:Function unknown)	PF02970.17(TBCA:Tubulin binding cofactor A)	cytoplasmic	1	35	12.7	High
A0A175YML2	1.69634	1.9e-05	up	yes	Aldo_ket_red domain-containing protein OS=Daucus carota subsp. sativus OX=79200 GN=DCAR_027622 PE=4 SV=1			GO:0003824(molecular_function:catalytic activity); GO:0003674(molecular_function:molecular_function); GO:0016491(molecular_function:oxidoreductase activity)		COG0667(S:Function unknown)	PF00248.22(Aldo_ket_red:Aldo/keto reductase family)	peroxisomal	7	35	37.5	High
A0A161ZK49	1.95233	0.004795	up	yes	Uncharacterized protein OS=Daucus carota subsp. sativus OX=79200 GN=DCAR_023484 PE=4 SV=1			GO:0005488(molecular_function:binding); GO:0043169(molecular_function:cation binding); GO:0005783(cellular_component:endoplasmic reticulum); GO:0016021(cellular_component:integral component of membrane); GO:0043167(molecular_function:ion binding); GO:0005575(cellular_component:cellular_component); GO:0043229(cellular_component:intracellular organelle); GO:0003674(molecular_function:molecular_func…		ENOG410XRVE(S:Function unknown)	PF00036.33(EF-hand_1:EF hand); PF13499.7(EF-hand_7:EF-hand domain pair); PF13405.7(EF-hand_6:EF-hand domain); PF13202.7(EF-hand_5:EF hand); PF10591.10(SPARC_Ca_bdg:Secreted protein acidic and rich in cysteine Ca binding region)	ER	1	3	43.1	High
A0A165ZFQ0	1.71685	3.1e-05	up	yes	Uncharacterized protein OS=Daucus carota subsp. sativus OX=79200 GN=DCAR_008736 PE=3 SV=1	K15448	TRM112, TRMT112	GO:0032259(biological_process:methylation); GO:0008152(biological_process:metabolic process); GO:0008150(biological_process:biological_process); GO:0003824(molecular_function:catalytic activity); GO:0016740(molecular_function:transferase activity); GO:0016741(molecular_function:transferase activity, transferring one-carbon groups); GO:0003674(molecular_function:molecular_function); GO:0005488(mol…			PF03966.17(Trm112p:Trm112p-like protein)	cytoplasmic	1	9	14	High
A0A162ALT6	1.78014	1e-06	up	yes	SAM_MT_RSMB_NOP domain-containing protein OS=Daucus carota subsp. sativus OX=79200 GN=DCAR_003477 PE=3 SV=1	K15334	NCL1, TRM4	GO:0008175(molecular_function:tRNA methyltransferase activity); GO:0009451(biological_process:RNA modification); GO:0090304(biological_process:nucleic acid metabolic process); GO:0034641(biological_process:cellular nitrogen compound metabolic process); GO:0006807(biological_process:nitrogen compound metabolic process); GO:0003674(molecular_function:molecular_function); GO:0005488(molecular_functi…		COG0144(J:Translation, ribosomal structure and biogenesis)	PF01189.18(Methyltr_RsmB-F:16S rRNA methyltransferase RsmB/F)	cytoplasmic	4	6	114.9	High
A0A166IGR1	1.71215	5e-06	up	yes	Uncharacterized protein OS=Daucus carota subsp. sativus OX=79200 GN=DCAR_003771 PE=4 SV=1	K00972	UAP1	GO:0003674(molecular_function:molecular_function); GO:0046349(biological_process:amino sugar biosynthetic process); GO:0044249(biological_process:cellular biosynthetic process); GO:0034641(biological_process:cellular nitrogen compound metabolic process); GO:0006807(biological_process:nitrogen compound metabolic process); GO:0003977(molecular_function:UDP-N-acetylglucosamine diphosphorylase activi…	map00520(Amino sugar and nucleotide sugar metabolism)	COG4284(O:Posttranslational modification, protein turnover, chaperones)	PF01704.19(UDPGP:UTP--glucose-1-phosphate uridylyltransferase)	chloroplast	9	18	61.6	High
A0A164XV91	1.61635	0.00012	up	yes	Uncharacterized protein OS=Daucus carota subsp. sativus OX=79200 GN=DCAR_016871 PE=4 SV=1	K14792	RRP5, PDCD11	GO:0032040(cellular_component:small-subunit processome); GO:1901363(molecular_function:heterocyclic compound binding); GO:0030684(cellular_component:preribosome); GO:0090304(biological_process:nucleic acid metabolic process); GO:0043229(cellular_component:intracellular organelle); GO:0043228(cellular_component:non-membrane-bounded organelle); GO:0003674(molecular_function:molecular_function); GO:…		COG0539(J:Translation, ribosomal structure and biogenesis)	PF00575.24(S1:S1 RNA binding domain); PF05843.15(Suf:Suppressor of forked protein (Suf)); PF08424.11(NRDE-2:NRDE-2, necessary for RNA interference)	nuclear	4	2	212.4	High
A0A161ZNT7	1.55733	0.000738	up	yes	Uncharacterized protein OS=Daucus carota subsp. sativus OX=79200 GN=DCAR_026227 PE=4 SV=1			GO:0019207(molecular_function:kinase regulator activity); GO:0019887(molecular_function:protein kinase regulator activity); GO:0016772(molecular_function:transferase activity, transferring phosphorus-containing groups); GO:0030234(molecular_function:enzyme regulator activity); GO:0016301(molecular_function:kinase activity); GO:0003824(molecular_function:catalytic activity); GO:0016740(molecular_f…		ENOG4111F2I(T:Signal transduction mechanisms)	PF00571.29(CBS:CBS domain)	peroxisomal	2	3	67.8	High
A0A161XAJ1	1.85069	0.000332	up	yes	PseudoU_synth_1 domain-containing protein OS=Daucus carota subsp. sativus OX=79200 GN=DCAR_023004 PE=3 SV=1	K06173	truA, PUS1	GO:0043231(cellular_component:intracellular membrane-bounded organelle); GO:0031119(biological_process:tRNA pseudouridine synthesis); GO:0009451(biological_process:RNA modification); GO:0090304(biological_process:nucleic acid metabolic process); GO:0034641(biological_process:cellular nitrogen compound metabolic process); GO:0006807(biological_process:nitrogen compound metabolic process); GO:00036…		COG0101(J:Translation, ribosomal structure and biogenesis)	PF01416.21(PseudoU_synth_1:tRNA pseudouridine synthase)	nuclear	2	4	55.7	High
A0A166BNA6	1.60594	0.002255	up	yes	Uncharacterized protein OS=Daucus carota subsp. sativus OX=79200 GN=DCAR_011413 PE=3 SV=1			GO:0004866(molecular_function:endopeptidase inhibitor activity); GO:0030234(molecular_function:enzyme regulator activity); GO:0061134(molecular_function:peptidase regulator activity); GO:0003674(molecular_function:molecular_function); GO:0030414(molecular_function:peptidase inhibitor activity); GO:0004857(molecular_function:enzyme inhibitor activity); GO:0098772(molecular_function:molecular funct…		ENOG410YHN1(O:Posttranslational modification, protein turnover, chaperones)	PF00197.19(Kunitz_legume:Trypsin and protease inhibitor)	vacuolar	11	57	22.1	High
A0A164XYK1	1.72892	2.7e-05	up	yes	Glycosyltransferase OS=Daucus carota subsp. sativus OX=79200 GN=DCAR_016980 PE=3 SV=1	K13495	CISZOG	GO:0043231(cellular_component:intracellular membrane-bounded organelle); GO:0043227(cellular_component:membrane-bounded organelle); GO:0043229(cellular_component:intracellular organelle); GO:0005575(cellular_component:cellular_component); GO:0003824(molecular_function:catalytic activity); GO:0016740(molecular_function:transferase activity); GO:0003674(molecular_function:molecular_function); GO:00…	map00908(Zeatin biosynthesis)	COG1819(S:Function unknown)	PF00201.19(UDPGT:UDP-glucoronosyl and UDP-glucosyl transferase)	extracellular	6	15	51.7	High
A0A161ZIE0	1.68213	0.002175	up	yes	CCT-eta OS=Daucus carota subsp. sativus OX=79200 GN=DCAR_023796 PE=3 SV=1	K09499	CCT7	GO:0006457(biological_process:protein folding); GO:0035639(molecular_function:purine ribonucleoside triphosphate binding); GO:0007165(biological_process:signal transduction); GO:0050789(biological_process:regulation of biological process); GO:0003674(molecular_function:molecular_function); GO:0051082(molecular_function:unfolded protein binding); GO:0043167(molecular_function:ion binding); GO:1901…		COG0459(O:Posttranslational modification, protein turnover, chaperones)	PF00118.25(Cpn60_TCP1:TCP-1/cpn60 chaperonin family)	chloroplast	2	49	64.1	High
A0A165XTT1	1.5493	0.000187	up	yes	Trafficking protein particle complex subunit 11 OS=Daucus carota subsp. sativus OX=79200 GN=DCAR_014120 PE=3 SV=1	K20308	TRAPPC11	GO:0006892(biological_process:post-Golgi vesicle-mediated transport); GO:0009987(biological_process:cellular process); GO:0016192(biological_process:vesicle-mediated transport); GO:0006895(biological_process:Golgi to endosome transport); GO:0048193(biological_process:Golgi vesicle transport); GO:0005829(cellular_component:cytosol); GO:0006810(biological_process:transport); GO:0005575(cellular_com…		ENOG410XSTE(S:Function unknown)	PF11817.9(Foie-gras_1:Foie gras liver health family 1); PF12742.8(Gryzun-like:Gryzun, putative Golgi trafficking)	cytoplasmic	3	2	132.9	High
A0A175YFL6	1.59065	4e-05	up	yes	tRNA(adenine(34)) deaminase OS=Daucus carota subsp. sativus OX=79200 GN=DCAR_029726 PE=4 SV=1			GO:0005488(molecular_function:binding); GO:0047974(molecular_function:guanosine deaminase activity); GO:0043169(molecular_function:cation binding); GO:0008251(molecular_function:tRNA-specific adenosine deaminase activity); GO:0009451(biological_process:RNA modification); GO:0090304(biological_process:nucleic acid metabolic process); GO:0034641(biological_process:cellular nitrogen compound metabol…		COG0590(F:Nucleotide transport and metabolism); COG0590(J:Translation, ribosomal structure and biogenesis)	PF14437.7(MafB19-deam:MafB19-like deaminase); PF00383.24(dCMP_cyt_deam_1:Cytidine and deoxycytidylate deaminase zinc-binding region)	cytoplasmic	1	7	11.1	High
A0A162AF67	1.72065	4e-06	up	yes	DUF4057 domain-containing protein OS=Daucus carota subsp. sativus OX=79200 GN=DCAR_008725 PE=4 SV=1					ENOG4111HUR(S:Function unknown)	PF13266.7(DUF4057:Protein of unknown function (DUF4057))	cytoplasmic	1	4	26.6	High
A0A164XH24	1.652	0.006996	up	yes	Malate synthase OS=Daucus carota subsp. sativus OX=79200 GN=DCAR_016413 PE=3 SV=1	K01638	aceB, glcB	GO:0019752(biological_process:carboxylic acid metabolic process); GO:0006099(biological_process:tricarboxylic acid cycle); GO:0003674(molecular_function:molecular_function); GO:0044281(biological_process:small molecule metabolic process); GO:0006097(biological_process:glyoxylate cycle); GO:0005737(cellular_component:cytoplasm); GO:0044262(biological_process:cellular carbohydrate metabolic process…	map00630(Glyoxylate and dicarboxylate metabolism); map00620(Pyruvate metabolism)	COG2225(C:Energy production and conversion)	PF01274.23(Malate_synthase:Malate synthase)	peroxisomal	29	58	64.5	High
A0A166IT62	1.70389	0.000893	up	yes	Uncharacterized protein OS=Daucus carota subsp. sativus OX=79200 GN=DCAR_004114 PE=4 SV=1	K16803	CKAP5, XMAP215	GO:0071705(biological_process:nitrogen compound transport); GO:0042886(biological_process:amide transport); GO:0008104(biological_process:protein localization); GO:0046907(biological_process:intracellular transport); GO:0033036(biological_process:macromolecule localization); GO:0006886(biological_process:intracellular protein transport); GO:0006810(biological_process:transport); GO:0045184(biolog…		ENOG410XPTW(S:Function unknown)	PF12348.9(CLASP_N:CLASP N terminal); PF02985.23(HEAT:HEAT repeat)	cytoplasmic	2	1	221.1	High
A0A164U433	1.72636	1.7e-05	up	yes	MPN domain-containing protein OS=Daucus carota subsp. sativus OX=79200 GN=DCAR_025483 PE=3 SV=1	K11864	BRCC3, BRCC36	GO:0101005(molecular_function:ubiquitinyl hydrolase activity); GO:0006139(biological_process:nucleobase-containing compound metabolic process); GO:0070646(biological_process:protein modification by small protein removal); GO:0090304(biological_process:nucleic acid metabolic process); GO:0034641(biological_process:cellular nitrogen compound metabolic process); GO:0006807(biological_process:nitroge…	map03440(Homologous recombination)	COG1310(S:Function unknown)	PF01398.22(JAB:JAB1/Mov34/MPN/PAD-1 ubiquitin protease); PF18110.2(BRCC36_C:BRCC36 C-terminal helical domain); PF14464.7(Prok-JAB:Prokaryotic homologs of the JAB domain)	cytoplasmic	4	9	47	High
A0A161YD54	1.63265	2.5e-05	up	yes	Glycosyltransferase OS=Daucus carota subsp. sativus OX=79200 GN=DCAR_022006 PE=3 SV=1	K23260	TOGT1	GO:0043231(cellular_component:intracellular membrane-bounded organelle); GO:0043227(cellular_component:membrane-bounded organelle); GO:0043229(cellular_component:intracellular organelle); GO:0005575(cellular_component:cellular_component); GO:0003824(molecular_function:catalytic activity); GO:0016740(molecular_function:transferase activity); GO:0003674(molecular_function:molecular_function); GO:00…	map00940(Phenylpropanoid biosynthesis)	COG1819(S:Function unknown)	PF00201.19(UDPGT:UDP-glucoronosyl and UDP-glucosyl transferase)	Golgi apparatus	9	26	53.1	High
A0A166JCZ8	1.69017	7.3e-05	up	yes	Uncharacterized protein OS=Daucus carota subsp. sativus OX=79200 GN=DCAR_004690 PE=4 SV=1	K13217	PRPF39, PRP39	GO:0090304(biological_process:nucleic acid metabolic process); GO:0034641(biological_process:cellular nitrogen compound metabolic process); GO:0006807(biological_process:nitrogen compound metabolic process); GO:0003674(molecular_function:molecular_function); GO:0005488(molecular_function:binding); GO:0003676(molecular_function:nucleic acid binding); GO:0003677(molecular_function:DNA binding); GO:…		ENOG410XPVR(A:RNA processing and modification)	PF13424.7(TPR_12:Tetratricopeptide repeat); PF05843.15(Suf:Suppressor of forked protein (Suf))	nuclear	10	14	92.4	High
A0A175YC33	1.5954	2.7e-05	up	yes	Terpene cyclase/mutase family member OS=Daucus carota subsp. sativus OX=79200 GN=DCAR_031237 PE=3 SV=1	K15813	LUP4	GO:0044249(biological_process:cellular biosynthetic process); GO:0043229(cellular_component:intracellular organelle); GO:0043228(cellular_component:non-membrane-bounded organelle); GO:0003674(molecular_function:molecular_function); GO:0016866(molecular_function:intramolecular transferase activity); GO:1901362(biological_process:organic cyclic compound biosynthetic process); GO:0043226(cellular_co…	map00909(Sesquiterpenoid and triterpenoid biosynthesis)	COG1657(S:Function unknown)	PF13243.7(SQHop_cyclase_C:Squalene-hopene cyclase C-terminal domain); PF13249.7(SQHop_cyclase_N:Squalene-hopene cyclase N-terminal domain); PF00432.22(Prenyltrans:Prenyltransferase and squalene oxidase repeat)	cytoplasmic	18	27	86	High
A0A161XH11	1.73764	0.003898	up	yes	Uncharacterized protein OS=Daucus carota subsp. sativus OX=79200 GN=DCAR_007126 PE=4 SV=1					ENOG4111ZI0(S:Function unknown)		cytoplasmic	3	6	44.8	High
A0A164X3Y2	1.67723	0.000326	up	yes	Protein disulfide-isomerase OS=Daucus carota subsp. sativus OX=79200 GN=DCAR_019961 PE=3 SV=1	K09580	PDIA1, P4HB	GO:0006457(biological_process:protein folding); GO:0005783(cellular_component:endoplasmic reticulum); GO:0042592(biological_process:homeostatic process); GO:0043229(cellular_component:intracellular organelle); GO:0003674(molecular_function:molecular_function); GO:0016864(molecular_function:intramolecular oxidoreductase activity, transposing S-S bonds); GO:0043227(cellular_component:membrane-bound…	map04141(Protein processing in endoplasmic reticulum)	COG0526(O:Posttranslational modification, protein turnover, chaperones)	PF00085.21(Thioredoxin:Thioredoxin); PF13848.7(Thioredoxin_6:Thioredoxin-like domain); PF13098.7(Thioredoxin_2:Thioredoxin-like domain); PF04756.14(OST3_OST6:OST3 / OST6 family, transporter family); PF13899.7(Thioredoxin_7:Thioredoxin-like); PF00578.22(AhpC-TSA:AhpC/TSA family)	ER	25	60	52.3	High
A0A175YGW3	1.72877	2e-06	up	yes	Aldo_ket_red domain-containing protein OS=Daucus carota subsp. sativus OX=79200 GN=DCAR_030312 PE=4 SV=1	K22374	DMAS1	GO:0004033(molecular_function:aldo-keto reductase (NADP) activity); GO:0004032(molecular_function:alditol:NADP+ 1-oxidoreductase activity); GO:0016614(molecular_function:oxidoreductase activity, acting on CH-OH group of donors); GO:0016616(molecular_function:oxidoreductase activity, acting on the CH-OH group of donors, NAD or NADP as acceptor); GO:0008106(molecular_function:alcohol dehydrogenase …		COG0656(O:Posttranslational modification, protein turnover, chaperones)	PF00248.22(Aldo_ket_red:Aldo/keto reductase family)	peroxisomal	5	22	36.4	High
A0A161WUT4	1.61315	0.004337	up	yes	Reticulon-like protein OS=Daucus carota subsp. sativus OX=79200 GN=DCAR_020288 PE=4 SV=1			GO:0031090(cellular_component:organelle membrane); GO:0016021(cellular_component:integral component of membrane); GO:0016020(cellular_component:membrane); GO:0005789(cellular_component:endoplasmic reticulum membrane); GO:0005575(cellular_component:cellular_component); GO:0031224(cellular_component:intrinsic component of membrane); GO:0110165(cellular_component:cellular anatomical entity)		ENOG410XPKH(E:Amino acid transport and metabolism)	PF02453.18(Reticulon:Reticulon)	ER	4	15	28.9	High
A0A175YQV1	1.68657	0.001899	up	yes	Aspartyl-tRNA synthetase OS=Daucus carota subsp. sativus OX=79200 GN=DCAR_027376 PE=3 SV=1	K22503	DARS	GO:0017101(cellular_component:aminoacyl-tRNA synthetase multienzyme complex); GO:0035639(molecular_function:purine ribonucleoside triphosphate binding); GO:0019752(biological_process:carboxylic acid metabolic process); GO:0090304(biological_process:nucleic acid metabolic process); GO:0034641(biological_process:cellular nitrogen compound metabolic process); GO:0006807(biological_process:nitrogen c…	map00970(Aminoacyl-tRNA biosynthesis)	COG0017(S:Function unknown)	PF00152.21(tRNA-synt_2:tRNA synthetases class II (D, K and N)); PF01336.26(tRNA_anti-codon:OB-fold nucleic acid binding domain)	cytoplasmic	15	30	59.8	High
A0A166CYM3	1.60019	0.002396	up	yes	Uncharacterized protein OS=Daucus carota subsp. sativus OX=79200 GN=DCAR_005338 PE=4 SV=1			GO:0008104(biological_process:protein localization); GO:0005342(molecular_function:organic acid transmembrane transporter activity); GO:0019867(cellular_component:outer membrane); GO:0043229(cellular_component:intracellular organelle); GO:0003674(molecular_function:molecular_function); GO:0051641(biological_process:cellular localization); GO:0043227(cellular_component:membrane-bounded organelle);…		ENOG410YKVU(O:Posttranslational modification, protein turnover, chaperones)	PF02466.20(Tim17:Tim17/Tim22/Tim23/Pmp24 family)	cytoplasmic	1	14	15.5	High
A0A165XZ75	1.73631	5.1e-05	up	yes	Uncharacterized protein OS=Daucus carota subsp. sativus OX=79200 GN=DCAR_013944 PE=4 SV=1			GO:0003824(molecular_function:catalytic activity); GO:0003674(molecular_function:molecular_function); GO:0050662(molecular_function:coenzyme binding)		COG0451(S:Function unknown)	PF01370.22(Epimerase:NAD dependent epimerase/dehydratase family); PF01073.20(3Beta_HSD:3-beta hydroxysteroid dehydrogenase/isomerase family); PF13460.7(NAD_binding_10:NAD(P)H-binding); PF16363.6(GDP_Man_Dehyd:GDP-mannose 4,6 dehydratase); PF07993.13(NAD_binding_4:Male sterility protein); PF02719.16(Polysacc_synt_2:Polysaccharide biosynthesis protein); PF05368.14(NmrA:NmrA-like family); PF08659.11…	cytoplasmic	10	30	68.9	High
A0A161YAZ0	1.53477	0.00092	up	yes	Alkaline/neutral invertase OS=Daucus carota subsp. sativus OX=79200 GN=DCAR_022958 PE=3 SV=1			GO:0016787(molecular_function:hydrolase activity); GO:0005829(cellular_component:cytosol); GO:0140096(molecular_function:catalytic activity, acting on a protein); GO:0033926(molecular_function:glycopeptide alpha-N-acetylgalactosaminidase activity); GO:0016798(molecular_function:hydrolase activity, acting on glycosyl bonds); GO:0005575(cellular_component:cellular_component); GO:0003824(molecular_f…		ENOG410XPYN(O:Posttranslational modification, protein turnover, chaperones)	PF12899.8(Glyco_hydro_100:Alkaline and neutral invertase)	cytoplasmic	1	8	65.3	High
A0A166AG48	1.75437	6.3e-05	up	yes	Coatomer subunit alpha OS=Daucus carota subsp. sativus OX=79200 GN=DCAR_009950 PE=4 SV=1	K05236	COPA, RET1	GO:0008104(biological_process:protein localization); GO:0015833(biological_process:peptide transport); GO:0003674(molecular_function:molecular_function); GO:0042886(biological_process:amide transport); GO:0006888(biological_process:ER to Golgi vesicle-mediated transport); GO:0031090(cellular_component:organelle membrane); GO:0006886(biological_process:intracellular protein transport); GO:0016020(…		ENOG410XPZS(S:Function unknown)	PF06957.12(COPI_C:Coatomer (COPI) alpha subunit C-terminus); PF04053.15(Coatomer_WDAD:Coatomer WD associated region); PF00400.33(WD40:WD domain, G-beta repeat)	cytoplasmic	3	27	129.4	High
A0A161ZV22	1.77209	0.000137	up	yes	WD_REPEATS_REGION domain-containing protein OS=Daucus carota subsp. sativus OX=79200 GN=DCAR_020803 PE=4 SV=1	K14556	DIP2, UTP12, WDR3	GO:0032040(cellular_component:small-subunit processome); GO:0030684(cellular_component:preribosome); GO:0090304(biological_process:nucleic acid metabolic process); GO:0034641(biological_process:cellular nitrogen compound metabolic process); GO:0006807(biological_process:nitrogen compound metabolic process); GO:0003674(molecular_function:molecular_function); GO:0005488(molecular_function:binding);…	map03008(Ribosome biogenesis in eukaryotes)	ENOG410XR1C(S:Function unknown)	PF00400.33(WD40:WD domain, G-beta repeat); PF04003.13(Utp12:Dip2/Utp12 Family); PF12894.8(ANAPC4_WD40:Anaphase-promoting complex subunit 4 WD40 domain); PF17005.6(WD40_like:WD40-like domain)	nuclear	2	2	105	High
A0A166E4R6	1.67096	0.000426	up	yes	60S ribosomal protein L36 OS=Daucus carota subsp. sativus OX=79200 GN=DCAR_006928 PE=3 SV=1	K02920	RP-L36e, RPL36	GO:0044238(biological_process:primary metabolic process); GO:0015934(cellular_component:large ribosomal subunit); GO:0022625(cellular_component:cytosolic large ribosomal subunit); GO:0044249(biological_process:cellular biosynthetic process); GO:0043229(cellular_component:intracellular organelle); GO:0043228(cellular_component:non-membrane-bounded organelle); GO:0003674(molecular_function:molecula…	map03010(Ribosome)	COG5051(J:Translation, ribosomal structure and biogenesis)	PF01158.19(Ribosomal_L36e:Ribosomal protein L36e)	nuclear	1	27	12.5	High
A0A161ZVX3	1.64897	0.006495	up	yes	Uncharacterized protein OS=Daucus carota subsp. sativus OX=79200 GN=DCAR_020373 PE=4 SV=1			GO:0003674(molecular_function:molecular_function); GO:0045735(molecular_function:nutrient reservoir activity)				cytoplasmic	1	13	7.7	High
A0A175YES3	1.7023	3.4e-05	up	yes	Uncharacterized protein OS=Daucus carota subsp. sativus OX=79200 GN=DCAR_029715 PE=3 SV=1	K03950	NDUFA6	GO:0045271(cellular_component:respiratory chain complex I); GO:0032991(cellular_component:macromolecular complex); GO:0030964(cellular_component:NADH dehydrogenase complex); GO:0098798(cellular_component:mitochondrial protein complex); GO:0050896(biological_process:response to stimulus); GO:0098803(cellular_component:respiratory chain complex); GO:0098800(cellular_component:inner mitochondrial me…	map00190(Oxidative phosphorylation)	ENOG4111S2F(I:Lipid transport and metabolism)		cytoplasmic	1	7	19.6	High
A0A166DB90	1.67861	1.4e-05	up	yes	E1 ubiquitin-activating enzyme OS=Daucus carota subsp. sativus OX=79200 GN=DCAR_005876 PE=3 SV=1	K03178	UBE1, UBA1	GO:0035639(molecular_function:purine ribonucleoside triphosphate binding); GO:0006807(biological_process:nitrogen compound metabolic process); GO:0003674(molecular_function:molecular_function); GO:0005488(molecular_function:binding); GO:0043167(molecular_function:ion binding); GO:1901363(molecular_function:heterocyclic compound binding); GO:1901265(molecular_function:nucleoside phosphate binding)…	map04120(Ubiquitin mediated proteolysis)	COG0476(H:Coenzyme transport and metabolism)	PF00899.22(ThiF:ThiF family); PF10585.10(UBA_e1_thiolCys:Ubiquitin-activating enzyme active site); PF16190.6(E1_FCCH:Ubiquitin-activating enzyme E1 FCCH domain); PF16191.6(E1_4HB:Ubiquitin-activating enzyme E1 four-helix bundle); PF09358.11(E1_UFD:Ubiquitin fold domain)	chloroplast	16	46	120.7	High
A0A166AI16	1.68295	0.000727	up	yes	Uncharacterized protein OS=Daucus carota subsp. sativus OX=79200 GN=DCAR_010034 PE=4 SV=1	K01696	trpB	GO:0006520(biological_process:cellular amino acid metabolic process); GO:0019752(biological_process:carboxylic acid metabolic process); GO:0043436(biological_process:oxoacid metabolic process); GO:0034641(biological_process:cellular nitrogen compound metabolic process); GO:0006807(biological_process:nitrogen compound metabolic process); GO:0003674(molecular_function:molecular_function); GO:004428…	map00400(Phenylalanine, tyrosine and tryptophan biosynthesis); map00260(Glycine, serine and threonine metabolism)	COG0133(E:Amino acid transport and metabolism)		ER	2	18	16.5	High
A0A166HV40	1.56286	0.000804	up	yes	Uncharacterized protein OS=Daucus carota subsp. sativus OX=79200 GN=DCAR_003083 PE=3 SV=1			GO:0004175(molecular_function:endopeptidase activity); GO:0090304(biological_process:nucleic acid metabolic process); GO:0034641(biological_process:cellular nitrogen compound metabolic process); GO:0006807(biological_process:nitrogen compound metabolic process); GO:0003674(molecular_function:molecular_function); GO:0034660(biological_process:ncRNA metabolic process); GO:0008233(molecular_function…		COG0319(S:Function unknown)	PF08282.13(Hydrolase_3:haloacid dehalogenase-like hydrolase); PF02130.18(UPF0054:Uncharacterized protein family UPF0054); PF05116.14(S6PP:Sucrose-6F-phosphate phosphohydrolase); PF00702.27(Hydrolase:haloacid dehalogenase-like hydrolase)	mitochondrial	1	2	60.8	High
A0A166CWS3	1.66073	0.000219	up	yes	Uncharacterized protein OS=Daucus carota subsp. sativus OX=79200 GN=DCAR_005278 PE=4 SV=1						PF04398.13(DUF538:Protein of unknown function, DUF538)	cytoplasmic	4	34	16.7	High
A0A166DT87	1.76181	0.000141	up	yes	Protein kinase domain-containing protein OS=Daucus carota subsp. sativus OX=79200 GN=DCAR_006483 PE=3 SV=1			GO:0080090(biological_process:regulation of primary metabolic process); GO:0019222(biological_process:regulation of metabolic process); GO:1901363(molecular_function:heterocyclic compound binding); GO:0010604(biological_process:positive regulation of macromolecule metabolic process); GO:0071704(biological_process:organic substance metabolic process); GO:0000166(molecular_function:nucleotide bindi…		ENOG410XPP3(T:Signal transduction mechanisms)	PF00069.26(Pkinase:Protein kinase domain); PF07714.18(PK_Tyr_Ser-Thr:Protein tyrosine and serine/threonine kinase)	cytoplasmic	2	5	51.9	High
A0A166J0Y6	1.52819	9e-05	up	yes	Uncharacterized protein OS=Daucus carota subsp. sativus OX=79200 GN=DCAR_004351 PE=3 SV=1	K07964	HPSE	GO:0016787(molecular_function:hydrolase activity); GO:0005618(cellular_component:cell wall); GO:0016020(cellular_component:membrane); GO:0016798(molecular_function:hydrolase activity, acting on glycosyl bonds); GO:0030312(cellular_component:external encapsulating structure); GO:0005575(cellular_component:cellular_component); GO:0003824(molecular_function:catalytic activity); GO:0003674(molecular_…	map00531(Glycosaminoglycan degradation)	ENOG410YDJW(G:Carbohydrate transport and metabolism)	PF03662.15(Glyco_hydro_79n:Glycosyl hydrolase family 79, N-terminal domain); PF05056.13(DUF674:Protein of unknown function (DUF674))	cytoplasmic	1	1	84.2	Medium
A0A166I699	1.52015	0.002802	up	yes	Ribosomal_L2_C domain-containing protein OS=Daucus carota subsp. sativus OX=79200 GN=DCAR_003450 PE=4 SV=1			GO:0044238(biological_process:primary metabolic process); GO:0015934(cellular_component:large ribosomal subunit); GO:0003676(molecular_function:nucleic acid binding); GO:0050789(biological_process:regulation of biological process); GO:1901363(molecular_function:heterocyclic compound binding); GO:0044249(biological_process:cellular biosynthetic process); GO:0043229(cellular_component:intracellular…		COG0090(S:Function unknown)	PF03947.19(Ribosomal_L2_C:Ribosomal Proteins L2, C-terminal domain)	chloroplast	1	3	25	Medium
A0A175YIH6	1.61479	4.8e-05	up	yes	Isopentenyl-diphosphate Delta-isomerase I-like OS=Daucus carota subsp. sativus OX=79200 GN=IPPI-2 PE=4 SV=1			GO:0005737(cellular_component:cytoplasm); GO:0004177(molecular_function:aminopeptidase activity); GO:0016853(molecular_function:isomerase activity); GO:0016787(molecular_function:hydrolase activity); GO:0003824(molecular_function:catalytic activity); GO:0140096(molecular_function:catalytic activity, acting on a protein); GO:0008239(molecular_function:dipeptidyl-peptidase activity); GO:0008238(mol…		COG0494(L:Replication, recombination and repair)	PF00293.29(NUDIX:NUDIX domain); PF03571.16(Peptidase_M49:Peptidase family M49)	cytoplasmic	8	22	89	High
A0A164WJI0	1.71264	0.000295	up	yes	Phosphopyruvate hydratase OS=Daucus carota subsp. sativus OX=79200 GN=DCAR_020782 PE=3 SV=1	K01689	ENO, eno	GO:0009185(biological_process:ribonucleoside diphosphate metabolic process); GO:0009259(biological_process:ribonucleotide metabolic process); GO:0016310(biological_process:phosphorylation); GO:0019752(biological_process:carboxylic acid metabolic process); GO:0034641(biological_process:cellular nitrogen compound metabolic process); GO:0006807(biological_process:nitrogen compound metabolic process)…	map03018(RNA degradation); map00010(Glycolysis / Gluconeogenesis)	COG0148(G:Carbohydrate transport and metabolism)	PF00113.23(Enolase_C:Enolase, C-terminal TIM barrel domain); PF03952.17(Enolase_N:Enolase, N-terminal domain); PF13378.7(MR_MLE_C:Enolase C-terminal domain-like)	chloroplast	9	82	47.9	High
A0A166FB57	1.92841	0.0002	up	yes	C2 domain-containing protein OS=Daucus carota subsp. sativus OX=79200 GN=DCAR_008414 PE=4 SV=1					ENOG410YITS(S:Function unknown); ENOG410YJA0(S:Function unknown)	PF00168.31(C2:C2 domain)	cytoplasmic	1	17	19.2	High
A0A175YPQ3	1.69226	0.000245	up	yes	Uncharacterized protein OS=Daucus carota subsp. sativus OX=79200 GN=DCAR_026983 PE=4 SV=1			GO:0071704(biological_process:organic substance metabolic process); GO:0016787(molecular_function:hydrolase activity); GO:0052692(molecular_function:raffinose alpha-galactosidase activity); GO:0005975(biological_process:carbohydrate metabolic process); GO:0003676(molecular_function:nucleic acid binding); GO:0044238(biological_process:primary metabolic process); GO:0097159(molecular_function:organ…		ENOG4111M4G(S:Function unknown)		cytoplasmic	2	29	7.9	High
A0A161YEL4	1.69126	0.003545	up	yes	Uncharacterized protein OS=Daucus carota subsp. sativus OX=79200 GN=DCAR_021346 PE=4 SV=1			GO:0080090(biological_process:regulation of primary metabolic process); GO:0019222(biological_process:regulation of metabolic process); GO:0031326(biological_process:regulation of cellular biosynthetic process); GO:0031323(biological_process:regulation of cellular metabolic process); GO:0003674(molecular_function:molecular_function); GO:0050789(biological_process:regulation of biological process)…		ENOG41100IM(S:Function unknown)	PF00571.29(CBS:CBS domain)	cytoplasmic	9	29	42.2	High
A0A161ZNZ8	1.58534	0.000943	up	yes	Glutamyl-tRNA synthetase OS=Daucus carota subsp. sativus OX=79200 GN=DCAR_025145 PE=3 SV=1	K01885	EARS, gltX	GO:0035639(molecular_function:purine ribonucleoside triphosphate binding); GO:0140098(molecular_function:catalytic activity, acting on RNA); GO:0019752(biological_process:carboxylic acid metabolic process); GO:0090304(biological_process:nucleic acid metabolic process); GO:0034641(biological_process:cellular nitrogen compound metabolic process); GO:0006807(biological_process:nitrogen compound meta…	map00860(Porphyrin and chlorophyll metabolism); map00970(Aminoacyl-tRNA biosynthesis)	COG0008(J:Translation, ribosomal structure and biogenesis)	PF00749.22(tRNA-synt_1c:tRNA synthetases class I (E and Q), catalytic domain); PF03950.19(tRNA-synt_1c_C:tRNA synthetases class I (E and Q), anti-codon binding domain)	chloroplast	19	28	82.3	High
A0A161Y5L8	1.681	0.001281	up	yes	Methylenetetrahydrofolate reductase OS=Daucus carota subsp. sativus OX=79200 GN=DCAR_005464 PE=3 SV=1	K00297	metF, MTHFR	GO:0006730(biological_process:one-carbon metabolic process); GO:0019752(biological_process:carboxylic acid metabolic process); GO:0016646(molecular_function:oxidoreductase activity, acting on the CH-NH group of donors, NAD or NADP as acceptor); GO:0034641(biological_process:cellular nitrogen compound metabolic process); GO:0006807(biological_process:nitrogen compound metabolic process); GO:000367…	map00670(One carbon pool by folate)	COG0685(E:Amino acid transport and metabolism)	PF02219.18(MTHFR:Methylenetetrahydrofolate reductase)	chloroplast	15	32	66.5	High
A0A164T5R7	1.67032	0.000187	up	yes	Uncharacterized protein OS=Daucus carota subsp. sativus OX=79200 GN=DCAR_024228 PE=3 SV=1	K02958	RP-S15e, RPS15	GO:0022607(biological_process:cellular component assembly); GO:0022627(cellular_component:cytosolic small ribosomal subunit); GO:0043933(biological_process:macromolecular complex subunit organization); GO:0000028(biological_process:ribosomal small subunit assembly); GO:0044249(biological_process:cellular biosynthetic process); GO:0034641(biological_process:cellular nitrogen compound metabolic pro…	map03010(Ribosome)	COG0185(G:Carbohydrate transport and metabolism)	PF00203.22(Ribosomal_S19:Ribosomal protein S19)	chloroplast	4	36	17.1	High
A0A166DTA3	1.67032	0.001878	up	yes	Rab-GAP TBC domain-containing protein OS=Daucus carota subsp. sativus OX=79200 GN=DCAR_006486 PE=4 SV=1					COG5210(S:Function unknown)	PF00566.19(RabGAP-TBC:Rab-GTPase-TBC domain)	cytoplasmic	2	3	93.6	High
A0A162A743	1.70281	0.000282	up	yes	Epimerase domain-containing protein OS=Daucus carota subsp. sativus OX=79200 GN=DCAR_015486 PE=4 SV=1	K12449	AXS	GO:0050662(molecular_function:coenzyme binding); GO:0005783(cellular_component:endoplasmic reticulum); GO:0016853(molecular_function:isomerase activity); GO:0016860(molecular_function:intramolecular oxidoreductase activity); GO:0140096(molecular_function:catalytic activity, acting on a protein); GO:0043231(cellular_component:intracellular membrane-bounded organelle); GO:0005575(cellular_component…	map00520(Amino sugar and nucleotide sugar metabolism)	COG0451(V:Defense mechanisms)	PF01370.22(Epimerase:NAD dependent epimerase/dehydratase family); PF16363.6(GDP_Man_Dehyd:GDP-mannose 4,6 dehydratase); PF02719.16(Polysacc_synt_2:Polysaccharide biosynthesis protein); PF01073.20(3Beta_HSD:3-beta hydroxysteroid dehydrogenase/isomerase family)	cytoplasmic	5	53	43.7	High
A0A161ZQ79	1.59845	5.8e-05	up	yes	Uncharacterized protein OS=Daucus carota subsp. sativus OX=79200 GN=DCAR_022895 PE=3 SV=1	K20769	CYP94A5	GO:0043169(molecular_function:cation binding); GO:0004497(molecular_function:monooxygenase activity); GO:0020037(molecular_function:heme binding); GO:0046914(molecular_function:transition metal ion binding); GO:0046906(molecular_function:tetrapyrrole binding); GO:0097159(molecular_function:organic cyclic compound binding); GO:0016021(cellular_component:integral component of membrane); GO:0016705(…	map00073(Cutin, suberine and wax biosynthesis)	COG2124(Q:Secondary metabolites biosynthesis, transport and catabolism)	PF00067.23(p450:Cytochrome P450)	cytoplasmic	7	18	53.8	High
A0A175YGP9	1.62905	0.000843	up	yes	Biotin synthase OS=Daucus carota subsp. sativus OX=79200 GN=DCAR_029917 PE=3 SV=1	K01012	bioB	GO:0019752(biological_process:carboxylic acid metabolic process); GO:0016053(biological_process:organic acid biosynthetic process); GO:0044249(biological_process:cellular biosynthetic process); GO:0034641(biological_process:cellular nitrogen compound metabolic process); GO:0006807(biological_process:nitrogen compound metabolic process); GO:0003674(molecular_function:molecular_function); GO:000548…	map00780(Biotin metabolism)	COG0502(H:Coenzyme transport and metabolism)	PF06968.14(BATS:Biotin and Thiamin Synthesis associated domain); PF04055.22(Radical_SAM:Radical SAM superfamily)	mitochondrial	5	11	66.6	High
A0A165X665	1.57006	0.006735	up	yes	Bulb-type lectin domain-containing protein OS=Daucus carota subsp. sativus OX=79200 GN=DCAR_014773 PE=4 SV=1			GO:0016772(molecular_function:transferase activity, transferring phosphorus-containing groups); GO:0016301(molecular_function:kinase activity); GO:0030246(molecular_function:carbohydrate binding); GO:0003824(molecular_function:catalytic activity); GO:0016740(molecular_function:transferase activity); GO:0003674(molecular_function:molecular_function); GO:0005488(molecular_function:binding)		ENOG410XWQ1(S:Function unknown)	PF01453.25(B_lectin:D-mannose binding lectin)	extracellular	8	72	15.4	High
A0A166ES63	1.53025	0.000642	up	yes	Purple acid phosphatase OS=Daucus carota subsp. sativus OX=79200 GN=DCAR_007748 PE=3 SV=1	K22390	ACP7	GO:0043169(molecular_function:cation binding); GO:0016791(molecular_function:phosphatase activity); GO:0016788(molecular_function:hydrolase activity, acting on ester bonds); GO:0016787(molecular_function:hydrolase activity); GO:0016021(cellular_component:integral component of membrane); GO:0003993(molecular_function:acid phosphatase activity); GO:0042578(molecular_function:phosphoric ester hydrol…		COG1409(S:Function unknown)	PF00149.29(Metallophos:Calcineurin-like phosphoesterase); PF14008.7(Metallophos_C:Iron/zinc purple acid phosphatase-like protein C); PF16656.6(Pur_ac_phosph_N:Purple acid Phosphatase, N-terminal domain)	extracellular	5	22	48.4	High
A0A165Z4P7	1.69758	0.00019	up	yes	DDB1- and CUL4-associated factor 13 OS=Daucus carota subsp. sativus OX=79200 GN=DCAR_013032 PE=3 SV=1	K11806	DCAF13, WDSOF1	GO:0032991(cellular_component:macromolecular complex); GO:1902494(cellular_component:catalytic complex); GO:0080008(cellular_component:Cul4-RING E3 ubiquitin ligase complex); GO:0000151(cellular_component:ubiquitin ligase complex); GO:0005575(cellular_component:cellular_component); GO:1990234(cellular_component:transferase complex); GO:0031461(cellular_component:cullin-RING ubiquitin ligase compl…		ENOG410XNX6(S:Function unknown)	PF04158.15(Sof1:Sof1-like domain); PF00400.33(WD40:WD domain, G-beta repeat)	chloroplast	1	2	63	High
A0A164TQR5	1.667	0.004072	up	yes	CobW C-terminal domain-containing protein OS=Daucus carota subsp. sativus OX=79200 GN=DCAR_024946 PE=3 SV=1					COG0523(O:Posttranslational modification, protein turnover, chaperones)	PF02492.20(cobW:CobW/HypB/UreG, nucleotide-binding domain); PF09353.11(DUF1995:Domain of unknown function (DUF1995)); PF07683.15(CobW_C:Cobalamin synthesis protein cobW C-terminal domain)	chloroplast	1	2	79.8	High
A0A166A827	1.5346	0.00109	up	yes	Protein disulfide-isomerase OS=Daucus carota subsp. sativus OX=79200 GN=DCAR_009612 PE=3 SV=1	K09580	PDIA1, P4HB	GO:0006457(biological_process:protein folding); GO:0005783(cellular_component:endoplasmic reticulum); GO:0042592(biological_process:homeostatic process); GO:0043229(cellular_component:intracellular organelle); GO:0003674(molecular_function:molecular_function); GO:0016864(molecular_function:intramolecular oxidoreductase activity, transposing S-S bonds); GO:0043227(cellular_component:membrane-bound…	map04141(Protein processing in endoplasmic reticulum)	COG0526(O:Posttranslational modification, protein turnover, chaperones)	PF00085.21(Thioredoxin:Thioredoxin); PF13848.7(Thioredoxin_6:Thioredoxin-like domain); PF13098.7(Thioredoxin_2:Thioredoxin-like domain); PF13899.7(Thioredoxin_7:Thioredoxin-like); PF04756.14(OST3_OST6:OST3 / OST6 family, transporter family); PF13905.7(Thioredoxin_8:Thioredoxin-like)	ER	22	46	57.9	High
A0A162A364	1.66335	5.6e-05	up	yes	Acetyl-CoA carboxytransferase OS=Daucus carota subsp. sativus OX=79200 GN=DCAR_018734 PE=3 SV=1	K01962	accA	GO:0006633(biological_process:fatty acid biosynthetic process); GO:0006631(biological_process:fatty acid metabolic process); GO:0009317(cellular_component:acetyl-CoA carboxylase complex); GO:0019752(biological_process:carboxylic acid metabolic process); GO:0044249(biological_process:cellular biosynthetic process); GO:0003674(molecular_function:molecular_function); GO:0044281(biological_process:sm…	map00640(Propanoate metabolism); map00061(Fatty acid biosynthesis); map00620(Pyruvate metabolism)	COG0825(I:Lipid transport and metabolism)	PF03255.15(ACCA:Acetyl co-enzyme A carboxylase carboxyltransferase alpha subunit); PF01039.23(Carboxyl_trans:Carboxyl transferase domain)	chloroplast	12	27	83.6	High
A0A169WRF6	1.66401	1e-05	up	yes	TCTP domain-containing protein OS=Daucus carota subsp. sativus OX=79200 GN=DCAR_002466 PE=3 SV=1			GO:0005737(cellular_component:cytoplasm); GO:0043169(molecular_function:cation binding); GO:0043167(molecular_function:ion binding); GO:0005575(cellular_component:cellular_component); GO:0003674(molecular_function:molecular_function); GO:0005509(molecular_function:calcium ion binding); GO:0046872(molecular_function:metal ion binding); GO:0110165(cellular_component:cellular anatomical entity); GO:…		ENOG4111FVP(S:Function unknown)	PF00838.18(TCTP:Translationally controlled tumour protein)	cytoplasmic	3	55	18.9	High
A0A175YPL3	1.5967	0.000702	up	yes	Uncharacterized protein OS=Daucus carota subsp. sativus OX=79200 GN=DCAR_027281 PE=4 SV=1	K18151	UAH	GO:0005783(cellular_component:endoplasmic reticulum); GO:0016787(molecular_function:hydrolase activity); GO:0044248(biological_process:cellular catabolic process); GO:0034641(biological_process:cellular nitrogen compound metabolic process); GO:0006807(biological_process:nitrogen compound metabolic process); GO:0003674(molecular_function:molecular_function); GO:0005488(molecular_function:binding);…	map00230(Purine metabolism)	COG0624(E:Amino acid transport and metabolism)	PF01546.29(Peptidase_M20:Peptidase family M20/M25/M40); PF04389.18(Peptidase_M28:Peptidase family M28)	ER	5	15	51.3	High
A0A166DP78	1.54139	0.02149	up	yes	AMMECR1 domain-containing protein OS=Daucus carota subsp. sativus OX=79200 GN=DCAR_006336 PE=4 SV=1			GO:0005575(cellular_component:cellular_component); GO:0005829(cellular_component:cytosol); GO:0110165(cellular_component:cellular anatomical entity)		COG2078(S:Function unknown)	PF01871.18(AMMECR1:AMMECR1)	cytoplasmic	2	10	23.1	High
A0A165Y829	1.63672	0.001496	up	yes	WD_REPEATS_REGION domain-containing protein OS=Daucus carota subsp. sativus OX=79200 GN=DCAR_013764 PE=4 SV=1	K12880	THOC3	GO:0015931(biological_process:nucleobase-containing compound transport); GO:0051169(biological_process:nuclear transport); GO:0051168(biological_process:nuclear export); GO:0030422(biological_process:production of siRNA involved in RNA interference); GO:0090304(biological_process:nucleic acid metabolic process); GO:0031050(biological_process:dsRNA fragmentation); GO:0034641(biological_process:cel…	map03013(RNA transport); map03040(Spliceosome)	ENOG410XPZJ(S:Function unknown)	PF12894.8(ANAPC4_WD40:Anaphase-promoting complex subunit 4 WD40 domain); PF00400.33(WD40:WD domain, G-beta repeat); PF08662.12(eIF2A:Eukaryotic translation initiation factor eIF2A)	cytoplasmic	1	4	35	High
A0A164WZA5	1.61765	0.000153	up	yes	Uncharacterized protein OS=Daucus carota subsp. sativus OX=79200 GN=DCAR_020160 PE=3 SV=1	K02937	RP-L7e, RPL7	GO:0022626(cellular_component:cytosolic ribosome); GO:0022625(cellular_component:cytosolic large ribosomal subunit); GO:0034660(biological_process:ncRNA metabolic process); GO:1901363(molecular_function:heterocyclic compound binding); GO:0090304(biological_process:nucleic acid metabolic process); GO:0043229(cellular_component:intracellular organelle); GO:0043228(cellular_component:non-membrane-bo…	map03010(Ribosome)	COG1841(S:Function unknown)	PF08079.13(Ribosomal_L30_N:Ribosomal L30 N-terminal domain); PF00327.21(Ribosomal_L30:Ribosomal protein L30p/L7e)	chloroplast	2	54	27.9	High
A0A162ABD2	1.61508	4.2e-05	up	yes	Diadenosine tetraphosphate synthetase OS=Daucus carota subsp. sativus OX=79200 GN=DCAR_013876 PE=3 SV=1	K01880	GARS, glyS1	GO:0035639(molecular_function:purine ribonucleoside triphosphate binding); GO:0019752(biological_process:carboxylic acid metabolic process); GO:0090304(biological_process:nucleic acid metabolic process); GO:0034641(biological_process:cellular nitrogen compound metabolic process); GO:0006807(biological_process:nitrogen compound metabolic process); GO:0003674(molecular_function:molecular_function);…	map00970(Aminoacyl-tRNA biosynthesis)	COG0423(J:Translation, ribosomal structure and biogenesis)	PF03129.21(HGTP_anticodon:Anticodon binding domain); PF00587.26(tRNA-synt_2b:tRNA synthetase class II core domain (G, H, P, S and T))	chloroplast	1	16	69.8	High
A0A164UK58	1.6141	0.000307	up	yes	Expansin OS=Daucus carota subsp. sativus OX=79200 GN=DCAR_026061 PE=3 SV=1	K20628	exlX	GO:0009664(biological_process:plant-type cell wall organization); GO:0071554(biological_process:cell wall organization or biogenesis); GO:0005618(cellular_component:cell wall); GO:0016021(cellular_component:integral component of membrane); GO:0009987(biological_process:cellular process); GO:0016043(biological_process:cellular component organization); GO:0030312(cellular_component:external encapsu…		ENOG410YCRV(G:Carbohydrate transport and metabolism)	PF01357.22(Expansin_C:Expansin C-terminal domain); PF03330.19(DPBB_1:Lytic transglycolase)	Golgi apparatus	2	15	26.1	High
A0A164SWA1	1.50752	0.000293	up	yes	Methionyl-tRNA synthetase OS=Daucus carota subsp. sativus OX=79200 GN=DCAR_023870 PE=3 SV=1	K01874	MARS, metG	GO:0006431(biological_process:methionyl-tRNA aminoacylation); GO:0035639(molecular_function:purine ribonucleoside triphosphate binding); GO:0019752(biological_process:carboxylic acid metabolic process); GO:0090304(biological_process:nucleic acid metabolic process); GO:0034641(biological_process:cellular nitrogen compound metabolic process); GO:0006807(biological_process:nitrogen compound metaboli…	map00450(Selenocompound metabolism); map00970(Aminoacyl-tRNA biosynthesis)	COG0073(E:Amino acid transport and metabolism)	PF09334.12(tRNA-synt_1g:tRNA synthetases class I (M)); PF01588.21(tRNA_bind:Putative tRNA binding domain); PF00133.23(tRNA-synt_1:tRNA synthetases class I (I, L, M and V))	nuclear	2	16	90.7	High
A0A175YJ76	1.65902	0.001745	up	yes	Pectate lyase OS=Daucus carota subsp. sativus OX=79200 GN=DCAR_030780 PE=3 SV=1	K01728	pel	GO:0010393(biological_process:galacturonan metabolic process); GO:0003674(molecular_function:molecular_function); GO:0005488(molecular_function:binding); GO:0031224(cellular_component:intrinsic component of membrane); GO:0043169(molecular_function:cation binding); GO:1901575(biological_process:organic substance catabolic process); GO:0045488(biological_process:pectin metabolic process); GO:001682…	map00040(Pentose and glucuronate interconversions)	COG3866(G:Carbohydrate transport and metabolism)	PF00544.20(Pectate_lyase_4:Pectate lyase); PF13229.7(Beta_helix:Right handed beta helix region)	Golgi apparatus	2	4	47.9	High
A0A166C5A0	1.59339	0.000336	up	yes	Uncharacterized protein OS=Daucus carota subsp. sativus OX=79200 GN=DCAR_012060 PE=3 SV=1	K03013	RPB5, POLR2E	GO:0044238(biological_process:primary metabolic process); GO:0030880(cellular_component:RNA polymerase complex); GO:0003899(molecular_function:DNA-directed RNA polymerase activity); GO:0006139(biological_process:nucleobase-containing compound metabolic process); GO:0008152(biological_process:metabolic process); GO:0044249(biological_process:cellular biosynthetic process); GO:0034641(biological_pr…	map03020(RNA polymerase)	COG2012(K:Transcription)	PF01191.20(RNA_pol_Rpb5_C:RNA polymerase Rpb5, C-terminal domain); PF03871.15(RNA_pol_Rpb5_N:RNA polymerase Rpb5, N-terminal domain)	nuclear	4	18	24.2	High
A0A175YGJ3	1.64647	0.000258	up	yes	Fructose-bisphosphate aldolase OS=Daucus carota subsp. sativus OX=79200 GN=DCAR_030182 PE=3 SV=1	K01623	ALDO	GO:0009185(biological_process:ribonucleoside diphosphate metabolic process); GO:0009259(biological_process:ribonucleotide metabolic process); GO:0010038(biological_process:response to metal ion); GO:0016052(biological_process:carbohydrate catabolic process); GO:0031976(cellular_component:plastid thylakoid); GO:0019752(biological_process:carboxylic acid metabolic process); GO:0043229(cellular_comp…	map00010(Glycolysis / Gluconeogenesis); map00030(Pentose phosphate pathway); map00051(Fructose and mannose metabolism); map00710(Carbon fixation in photosynthetic organisms)	COG3588(I:Lipid transport and metabolism); COG3588(M:Cell wall/membrane/envelope biogenesis)	PF00274.20(Glycolytic:Fructose-bisphosphate aldolase class-I)	chloroplast	14	50	42.5	High
A0A161WQR2	1.74923	0.002385	up	yes	YTH domain-containing protein OS=Daucus carota subsp. sativus OX=79200 GN=DCAR_023821 PE=4 SV=1	K20102	YTHDF	GO:0097159(molecular_function:organic cyclic compound binding); GO:0003674(molecular_function:molecular_function); GO:0005488(molecular_function:binding); GO:0003676(molecular_function:nucleic acid binding); GO:1901363(molecular_function:heterocyclic compound binding); GO:0003723(molecular_function:RNA binding)		ENOG410YABQ(S:Function unknown)	PF04146.16(YTH:YT521-B-like domain)	cytoplasmic	1	5	73.4	High
A0A162AVS0	1.66034	4.9e-05	up	yes	Alpha-1,4 glucan phosphorylase OS=Daucus carota subsp. sativus OX=79200 GN=DCAR_007400 PE=3 SV=1	K00688	PYG, glgP	GO:0010038(biological_process:response to metal ion); GO:1901363(molecular_function:heterocyclic compound binding); GO:0070279(molecular_function:vitamin B6 binding); GO:0043229(cellular_component:intracellular organelle); GO:0003674(molecular_function:molecular_function); GO:0030170(molecular_function:pyridoxal phosphate binding); GO:0009414(biological_process:response to water deprivation); GO:…	map00500(Starch and sucrose metabolism)	COG0058(E:Amino acid transport and metabolism)	PF00343.21(Phosphorylase:Carbohydrate phosphorylase)	chloroplast	32	46	111.8	High
A0A165WZL9	1.61237	0.002055	up	yes	Uncharacterized protein OS=Daucus carota subsp. sativus OX=79200 GN=DCAR_014843 PE=3 SV=1	K03283	HSPA1s	GO:0043168(molecular_function:anion binding); GO:0097367(molecular_function:carbohydrate derivative binding); GO:0003674(molecular_function:molecular_function); GO:0030554(molecular_function:adenyl nucleotide binding); GO:0035639(molecular_function:purine ribonucleoside triphosphate binding); GO:0097159(molecular_function:organic cyclic compound binding); GO:0000166(molecular_function:nucleotide …	map04144(Endocytosis); map04141(Protein processing in endoplasmic reticulum); map03040(Spliceosome)	COG0443(J:Translation, ribosomal structure and biogenesis)	PF00012.21(HSP70:Hsp70 protein); PF06723.14(MreB_Mbl:MreB/Mbl protein)	cytoplasmic	6	59	63.1	High
A0A161Y2P2	1.70152	0.009965	up	yes	Uncharacterized protein OS=Daucus carota subsp. sativus OX=79200 GN=DCAR_012183 PE=3 SV=1	K12196	VPS4	GO:0035639(molecular_function:purine ribonucleoside triphosphate binding); GO:1901363(molecular_function:heterocyclic compound binding); GO:0043229(cellular_component:intracellular organelle); GO:0003674(molecular_function:molecular_function); GO:0005488(molecular_function:binding); GO:0016887(molecular_function:ATPase activity); GO:0043167(molecular_function:ion binding); GO:0043227(cellular_com…	map04144(Endocytosis)	ENOG410XRHN(O:Posttranslational modification, protein turnover, chaperones)	PF00004.30(AAA:ATPase family associated with various cellular activities (AAA)); PF09336.11(Vps4_C:Vps4 C terminal oligomerisation domain); PF04212.19(MIT:MIT (microtubule interacting and transport) domain)	chloroplast	1	3	48.3	High
A0A164UNU7	1.55919	0.01049	up	yes	Uncharacterized protein OS=Daucus carota subsp. sativus OX=79200 GN=DCAR_026223 PE=3 SV=1	K02880	RP-L17e, RPL17	GO:0044238(biological_process:primary metabolic process); GO:0015934(cellular_component:large ribosomal subunit); GO:0044249(biological_process:cellular biosynthetic process); GO:0034641(biological_process:cellular nitrogen compound metabolic process); GO:0006807(biological_process:nitrogen compound metabolic process); GO:0003674(molecular_function:molecular_function); GO:0034645(biological_proce…	map03010(Ribosome)	COG0091(J:Translation, ribosomal structure and biogenesis)	PF00237.20(Ribosomal_L22:Ribosomal protein L22p/L17e)	chloroplast	2	33	20.7	High
A0A175YIF9	1.68705	0.01262	up	yes	Uncharacterized protein OS=Daucus carota subsp. sativus OX=79200 GN=DCAR_031055 PE=4 SV=1					ENOG4111ZI0(U:Intracellular trafficking, secretion, and vesicular transport)		cytoplasmic	3	10	46	High
A0A162A8C1	1.54554	0.000741	up	yes	Uncharacterized protein OS=Daucus carota subsp. sativus OX=79200 GN=DCAR_015658 PE=4 SV=1					COG3332(S:Function unknown)	PF05742.13(TANGO2:Transport and Golgi organisation 2)	cytoplasmic	1	6	30.8	High
A0A175YF87	1.68947	8e-06	up	yes	Uncharacterized protein OS=Daucus carota subsp. sativus OX=79200 GN=DCAR_029454 PE=4 SV=1	K10352	MYH	GO:0005575(cellular_component:cellular_component); GO:0016021(cellular_component:integral component of membrane); GO:0110165(cellular_component:cellular anatomical entity); GO:0031224(cellular_component:intrinsic component of membrane)		ENOG4111BJ8(S:Function unknown)		cytoplasmic	4	5	68.2	High
A0A164ZFH5	1.57823	4e-05	up	yes	Adenosine kinase OS=Daucus carota subsp. sativus OX=79200 GN=DCAR_019097 PE=3 SV=1	K00856	E2.7.1.20, ADK	GO:0019206(molecular_function:nucleoside kinase activity); GO:0019205(molecular_function:nucleobase-containing compound kinase activity); GO:0044249(biological_process:cellular biosynthetic process); GO:0043229(cellular_component:intracellular organelle); GO:0006807(biological_process:nitrogen compound metabolic process); GO:0003674(molecular_function:molecular_function); GO:0009163(biological_pr…	map00230(Purine metabolism)	COG0524(G:Carbohydrate transport and metabolism)	PF00294.25(PfkB:pfkB family carbohydrate kinase)	mitochondrial	4	53	37.1	High
A0A164T9L5	1.64935	4.7e-05	up	yes	Formyltetrahydrofolate synthetase OS=Daucus carota subsp. sativus OX=79200 GN=DCAR_024372 PE=3 SV=1	K01938	fhs	GO:0043168(molecular_function:anion binding); GO:0042398(biological_process:cellular modified amino acid biosynthetic process); GO:0044237(biological_process:cellular metabolic process); GO:0044283(biological_process:small molecule biosynthetic process); GO:1901363(molecular_function:heterocyclic compound binding); GO:0019752(biological_process:carboxylic acid metabolic process); GO:0016053(biolo…	map00670(One carbon pool by folate)	COG2759(F:Nucleotide transport and metabolism)	PF01268.20(FTHFS:Formate--tetrahydrofolate ligase)	chloroplast	22	38	125.4	High
A0A164TT81	1.58479	0.003164	up	yes	Uncharacterized protein OS=Daucus carota subsp. sativus OX=79200 GN=DCAR_025022 PE=4 SV=1	K07893	RAB6A	GO:0035639(molecular_function:purine ribonucleoside triphosphate binding); GO:0003674(molecular_function:molecular_function); GO:0005488(molecular_function:binding); GO:0043167(molecular_function:ion binding); GO:1901363(molecular_function:heterocyclic compound binding); GO:0001883(molecular_function:purine nucleoside binding); GO:0001882(molecular_function:nucleoside binding); GO:0043168(molecul…		ENOG410XPBI(E:Amino acid transport and metabolism)	PF00071.23(Ras:Ras family); PF08477.14(Roc:Ras of Complex, Roc, domain of DAPkinase); PF00025.22(Arf:ADP-ribosylation factor family); PF00009.28(GTP_EFTU:Elongation factor Tu GTP binding domain); PF09439.11(SRPRB:Signal recognition particle receptor beta subunit)	chloroplast	1	40	22.8	High
A0A166FDV8	1.66215	1.3e-05	up	yes	Aconitase_C domain-containing protein OS=Daucus carota subsp. sativus OX=79200 GN=DCAR_008502 PE=4 SV=1	K01704	leuD, IPMI-S	GO:0016835(molecular_function:carbon-oxygen lyase activity); GO:0016836(molecular_function:hydro-lyase activity); GO:0003674(molecular_function:molecular_function); GO:0016829(molecular_function:lyase activity); GO:0003824(molecular_function:catalytic activity)	map00660(C5-Branched dibasic acid metabolism); map00290(Valine, leucine and isoleucine biosynthesis)	COG0066(E:Amino acid transport and metabolism)	PF00694.20(Aconitase_C:Aconitase C-terminal domain)	chloroplast	7	40	26.9	High
A0A175YJM2	1.64635	9.8e-05	up	yes	Ribosomal_L7Ae domain-containing protein OS=Daucus carota subsp. sativus OX=79200 GN=DCAR_028813 PE=4 SV=1	K12845	SNU13, NHP2L	GO:0005488(molecular_function:binding); GO:0032040(cellular_component:small-subunit processome); GO:0000470(biological_process:maturation of LSU-rRNA); GO:0043169(molecular_function:cation binding); GO:0030684(cellular_component:preribosome); GO:0090304(biological_process:nucleic acid metabolic process); GO:0043229(cellular_component:intracellular organelle); GO:0043228(cellular_component:non-mem…	map03008(Ribosome biogenesis in eukaryotes); map03040(Spliceosome)	COG1358(S:Function unknown)	PF01248.27(Ribosomal_L7Ae:Ribosomal protein L7Ae/L30e/S12e/Gadd45 family)	chloroplast	2	54	5.9	High
A0A162AIQ0	1.70306	0.001895	up	yes	Uncharacterized protein OS=Daucus carota subsp. sativus OX=79200 GN=DCAR_010278 PE=3 SV=1			GO:0043229(cellular_component:intracellular organelle); GO:0003674(molecular_function:molecular_function); GO:0008168(molecular_function:methyltransferase activity); GO:0043227(cellular_component:membrane-bounded organelle); GO:0043226(cellular_component:organelle); GO:0031224(cellular_component:intrinsic component of membrane); GO:0005737(cellular_component:cytoplasm); GO:0031984(cellular_compon…		ENOG410Y2C5(S:Function unknown)	PF03141.17(Methyltransf_29:Putative S-adenosyl-L-methionine-dependent methyltransferase); PF08241.13(Methyltransf_11:Methyltransferase domain); PF13649.7(Methyltransf_25:Methyltransferase domain)	Golgi apparatus	1	3	90.2	High
A0A164V9H7	1.78388	0.000287	up	yes	D-3-phosphoglycerate dehydrogenase OS=Daucus carota subsp. sativus OX=79200 GN=DCAR_022628 PE=3 SV=1	K00058	serA, PHGDH	GO:0051287(molecular_function:NAD binding); GO:0019752(biological_process:carboxylic acid metabolic process); GO:0044249(biological_process:cellular biosynthetic process); GO:0006807(biological_process:nitrogen compound metabolic process); GO:0003674(molecular_function:molecular_function); GO:0044281(biological_process:small molecule metabolic process); GO:0044283(biological_process:small molecul…	map00270(Cysteine and methionine metabolism); map00260(Glycine, serine and threonine metabolism)	COG0111(S:Function unknown)	PF02826.20(2-Hacid_dh_C:D-isomer specific 2-hydroxyacid dehydrogenase, NAD binding domain); PF00389.31(2-Hacid_dh:D-isomer specific 2-hydroxyacid dehydrogenase, catalytic domain); PF01842.26(ACT:ACT domain)	chloroplast	3	12	66	High
A0A175YRW0	1.56893	0.000586	up	yes	40S ribosomal protein S8 OS=Daucus carota subsp. sativus OX=79200 GN=DCAR_026667 PE=3 SV=1	K02995	RP-S8e, RPS8	GO:0022627(cellular_component:cytosolic small ribosomal subunit); GO:0043232(cellular_component:intracellular non-membrane-bounded organelle); GO:0090304(biological_process:nucleic acid metabolic process); GO:0044249(biological_process:cellular biosynthetic process); GO:0034641(biological_process:cellular nitrogen compound metabolic process); GO:0006807(biological_process:nitrogen compound metabo…	map03010(Ribosome)	COG2007(S:Function unknown)	PF01201.23(Ribosomal_S8e:Ribosomal protein S8e)	nuclear	4	50	24.8	High
A0A166HC10	1.56298	6.8e-05	up	yes	tRNA (guanine-N(7)-)-methyltransferase non-catalytic subunit OS=Daucus carota subsp. sativus OX=79200 GN=DCAR_002720 PE=3 SV=1	K15443	TRM82, WDR4	GO:0036265(biological_process:RNA (guanine-N7)-methylation); GO:1990234(cellular_component:transferase complex); GO:0043527(cellular_component:tRNA methyltransferase complex); GO:0009451(biological_process:RNA modification); GO:0090304(biological_process:nucleic acid metabolic process); GO:0034641(biological_process:cellular nitrogen compound metabolic process); GO:0006807(biological_process:nitr…		COG2319(K:Transcription); ENOG4111WRP(S:Function unknown)	PF00400.33(WD40:WD domain, G-beta repeat); PF12894.8(ANAPC4_WD40:Anaphase-promoting complex subunit 4 WD40 domain)	nuclear	3	10	46.6	High
A0A164UL01	1.6508	3.6e-05	up	yes	Carbamoyl-phosphate synthase (glutamine-hydrolyzing) OS=Daucus carota subsp. sativus OX=79200 GN=DCAR_026092 PE=3 SV=1	K01955	carB, CPA2	GO:0035639(molecular_function:purine ribonucleoside triphosphate binding); GO:0006807(biological_process:nitrogen compound metabolic process); GO:0003674(molecular_function:molecular_function); GO:0005488(molecular_function:binding); GO:0043167(molecular_function:ion binding); GO:1901363(molecular_function:heterocyclic compound binding); GO:1901265(molecular_function:nucleoside phosphate binding)…	map00240(Pyrimidine metabolism); map00250(Alanine, aspartate and glutamate metabolism)	COG0458(F:Nucleotide transport and metabolism)	PF02786.18(CPSase_L_D2:Carbamoyl-phosphate synthase L chain, ATP binding domain); PF02787.20(CPSase_L_D3:Carbamoyl-phosphate synthetase large chain, oligomerisation domain); PF02142.23(MGS:MGS-like domain); PF02222.23(ATP-grasp:ATP-grasp domain); PF07478.14(Dala_Dala_lig_C:D-ala D-ala ligase C-terminus); PF13535.7(ATP-grasp_4:ATP-grasp domain)	cytoplasmic	16	34	119	High
A0A164Z661	1.84607	0.002421	up	yes	E3 ubiquitin-protein ligase listerin OS=Daucus carota subsp. sativus OX=79200 GN=DCAR_018643 PE=3 SV=1	K22377	LTN1	GO:0044248(biological_process:cellular catabolic process); GO:0006807(biological_process:nitrogen compound metabolic process); GO:0003674(molecular_function:molecular_function); GO:0008270(molecular_function:zinc ion binding); GO:0043632(biological_process:modification-dependent macromolecule catabolic process); GO:0061630(molecular_function:ubiquitin protein ligase activity); GO:0031224(cellular…		COG5219(O:Posttranslational modification, protein turnover, chaperones)	PF13639.7(zf-RING_2:Ring finger domain); PF12678.8(zf-rbx1:RING-H2 zinc finger domain)	mitochondrial	1	0	210.7	Medium
A0A165WEW7	1.7952	0.001886	up	yes	Uncharacterized protein OS=Daucus carota subsp. sativus OX=79200 GN=DCAR_015239 PE=4 SV=1	K14567	UTP14	GO:0032040(cellular_component:small-subunit processome); GO:1901363(molecular_function:heterocyclic compound binding); GO:0030684(cellular_component:preribosome); GO:0090304(biological_process:nucleic acid metabolic process); GO:0043229(cellular_component:intracellular organelle); GO:0043228(cellular_component:non-membrane-bounded organelle); GO:0003674(molecular_function:molecular_function); GO:…	map03008(Ribosome biogenesis in eukaryotes)	COG5644(S:Function unknown)	PF04615.14(Utp14:Utp14 protein)	nuclear	1	1	93.3	High
A0A164XIQ0	1.55513	5.3e-05	up	yes	WD_REPEATS_REGION domain-containing protein OS=Daucus carota subsp. sativus OX=79200 GN=DCAR_016476 PE=4 SV=1	K17868	DPH7, RRT2	GO:0008150(biological_process:biological_process); GO:0003824(molecular_function:catalytic activity); GO:0016740(molecular_function:transferase activity); GO:0016741(molecular_function:transferase activity, transferring one-carbon groups); GO:0003674(molecular_function:molecular_function); GO:0008152(biological_process:metabolic process); GO:0008168(molecular_function:methyltransferase activity);…		ENOG4111MMJ(S:Function unknown)	PF00400.33(WD40:WD domain, G-beta repeat)	cytoplasmic	1	3	38.5	High
A0A164XGW8	1.53065	0.000322	up	yes	Uncharacterized protein OS=Daucus carota subsp. sativus OX=79200 GN=DCAR_016409 PE=4 SV=1					ENOG410XUBM(K:Transcription); ENOG410YYXY(K:Transcription)		vacuolar	1	8	23.6	High
A0A166J8X4	1.60552	0.006491	up	yes	Phosphomevalonate kinase OS=Daucus carota subsp. sativus OX=79200 GN=DCAR_004572 PE=4 SV=1	K00938	E2.7.4.2, mvaK2	GO:0006637(biological_process:acyl-CoA metabolic process); GO:0035639(molecular_function:purine ribonucleoside triphosphate binding); GO:0033875(biological_process:ribonucleoside bisphosphate metabolic process); GO:1901363(molecular_function:heterocyclic compound binding); GO:0009259(biological_process:ribonucleotide metabolic process); GO:0042579(cellular_component:microbody); GO:0043229(cellula…	map00900(Terpenoid backbone biosynthesis)	COG3890(I:Lipid transport and metabolism)	PF00288.27(GHMP_kinases_N:GHMP kinases N terminal domain); PF08544.14(GHMP_kinases_C:GHMP kinases C terminal)	extracellular	3	11	55.8	High
A0A166DJ68	1.73836	8e-06	up	yes	Uncharacterized protein OS=Daucus carota subsp. sativus OX=79200 GN=DCAR_006149 PE=3 SV=1	K02943	RP-LP2, RPLP2	GO:0044249(biological_process:cellular biosynthetic process); GO:0043229(cellular_component:intracellular organelle); GO:0043228(cellular_component:non-membrane-bounded organelle); GO:0003674(molecular_function:molecular_function); GO:0034645(biological_process:cellular macromolecule biosynthetic process); GO:0043226(cellular_component:organelle); GO:1901576(biological_process:organic substance b…	map03010(Ribosome)	COG2058(J:Translation, ribosomal structure and biogenesis)	PF00428.20(Ribosomal_60s:60s Acidic ribosomal protein)	cytoplasmic	2	78	11.4	High
A0A166H597	1.55911	0.000985	up	yes	Uncharacterized protein OS=Daucus carota subsp. sativus OX=79200 GN=DCAR_002396 PE=3 SV=1	K02960	RP-S16e, RPS16	GO:0044238(biological_process:primary metabolic process); GO:0043232(cellular_component:intracellular non-membrane-bounded organelle); GO:0044249(biological_process:cellular biosynthetic process); GO:0034641(biological_process:cellular nitrogen compound metabolic process); GO:0006807(biological_process:nitrogen compound metabolic process); GO:0003674(molecular_function:molecular_function); GO:003…	map03010(Ribosome)	COG0103(J:Translation, ribosomal structure and biogenesis)	PF00380.20(Ribosomal_S9:Ribosomal protein S9/S16)	chloroplast	7	43	16.5	High
A0A164XXC0	1.52486	0.002442	up	yes	R3H domain-containing protein OS=Daucus carota subsp. sativus OX=79200 GN=DCAR_016938 PE=4 SV=1	K14442;cpap	DHX36, RHAU;	GO:0016887(molecular_function:ATPase activity); GO:0035639(molecular_function:purine ribonucleoside triphosphate binding); GO:1901363(molecular_function:heterocyclic compound binding); GO:0043229(cellular_component:intracellular organelle); GO:0003674(molecular_function:molecular_function); GO:0005488(molecular_function:binding); GO:0003676(molecular_function:nucleic acid binding); GO:0043167(mol…	map03018(RNA degradation)	COG1643(S:Function unknown)	PF01424.23(R3H:R3H domain)	nuclear	1	1	69.1	Medium
A0A166F7P1	2.07692	0.006275	up	yes	C2H2-type domain-containing protein OS=Daucus carota subsp. sativus OX=79200 GN=DCAR_008275 PE=4 SV=1			GO:0097159(molecular_function:organic cyclic compound binding); GO:0003674(molecular_function:molecular_function); GO:1901363(molecular_function:heterocyclic compound binding); GO:0003676(molecular_function:nucleic acid binding); GO:0005488(molecular_function:binding)		ENOG410YVZ2(K:Transcription)	PF13912.7(zf-C2H2_6:C2H2-type zinc finger)	nuclear	1	6	26.6	Medium
A0A175YLW7	1.67173	0.002565	up	yes	Expansin OS=Daucus carota subsp. sativus OX=79200 GN=DCAR_028746 PE=3 SV=1			GO:0009664(biological_process:plant-type cell wall organization); GO:0071554(biological_process:cell wall organization or biogenesis); GO:0005618(cellular_component:cell wall); GO:0009987(biological_process:cellular process); GO:0016043(biological_process:cellular component organization); GO:0030312(cellular_component:external encapsulating structure); GO:0005575(cellular_component:cellular_compo…		ENOG410YEM2(G:Carbohydrate transport and metabolism)	PF01357.22(Expansin_C:Expansin C-terminal domain); PF03330.19(DPBB_1:Lytic transglycolase)	extracellular	3	15	27.7	High
A0A165YZI7	1.61111	0.002309	up	yes	40S ribosomal protein S8 OS=Daucus carota subsp. sativus OX=79200 GN=DCAR_013207 PE=3 SV=1	K02995	RP-S8e, RPS8	GO:0044238(biological_process:primary metabolic process); GO:0043232(cellular_component:intracellular non-membrane-bounded organelle); GO:0044249(biological_process:cellular biosynthetic process); GO:0034641(biological_process:cellular nitrogen compound metabolic process); GO:0006807(biological_process:nitrogen compound metabolic process); GO:0003674(molecular_function:molecular_function); GO:003…	map03010(Ribosome)	COG2007(J:Translation, ribosomal structure and biogenesis)	PF01201.23(Ribosomal_S8e:Ribosomal protein S8e); PF02466.20(Tim17:Tim17/Tim22/Tim23/Pmp24 family)	chloroplast	2	26	41.4	High
A0A166GY69	1.59625	0.001475	up	yes	Uncharacterized protein OS=Daucus carota subsp. sativus OX=79200 GN=DCAR_002146 PE=3 SV=1	K02136	ATPeF1G, ATP5C1, ATP3	GO:0005261(molecular_function:cation channel activity); GO:0009165(biological_process:nucleotide biosynthetic process); GO:0044281(biological_process:small molecule metabolic process); GO:1901362(biological_process:organic cyclic compound biosynthetic process); GO:1901360(biological_process:organic cyclic compound metabolic process); GO:0045261(cellular_component:proton-transporting ATP synthase …	map00190(Oxidative phosphorylation)	COG0224(C:Energy production and conversion)	PF00231.20(ATP-synt:ATP synthase)	chloroplast	13	52	33.6	High
A0A164V7R9	1.55588	0.001224	up	yes	Glycylpeptide N-tetradecanoyltransferase OS=Daucus carota subsp. sativus OX=79200 GN=DCAR_022701 PE=3 SV=1	K00671	NMT	GO:0006807(biological_process:nitrogen compound metabolic process); GO:0003674(molecular_function:molecular_function); GO:0044237(biological_process:cellular metabolic process); GO:0031365(biological_process:N-terminal protein amino acid modification); GO:0043170(biological_process:macromolecule metabolic process); GO:0044267(biological_process:cellular protein metabolic process); GO:0044260(biol…		COG5092(I:Lipid transport and metabolism)	PF01233.20(NMT:Myristoyl-CoA:protein N-myristoyltransferase, N-terminal domain); PF02799.16(NMT_C:Myristoyl-CoA:protein N-myristoyltransferase, C-terminal domain)	cytoplasmic	1	19	49.8	High
A0A161ZI33	1.53616	0.02938	up	yes	Ribosomal_L18e/L15P domain-containing protein OS=Daucus carota subsp. sativus OX=79200 GN=DCAR_023656 PE=3 SV=1	K02876	RP-L15, MRPL15, rplO	GO:0044238(biological_process:primary metabolic process); GO:0015934(cellular_component:large ribosomal subunit); GO:0044249(biological_process:cellular biosynthetic process); GO:0034641(biological_process:cellular nitrogen compound metabolic process); GO:0006807(biological_process:nitrogen compound metabolic process); GO:0003674(molecular_function:molecular_function); GO:0034645(biological_proce…	map03010(Ribosome)	COG0200(J:Translation, ribosomal structure and biogenesis)	PF00828.20(Ribosomal_L27A:Ribosomal proteins 50S-L15, 50S-L18e, 60S-L27A)	chloroplast	1	4	28.5	High
A0A166E3F7	1.65556	0	up	yes	4-hydroxy-tetrahydrodipicolinate synthase OS=Daucus carota subsp. sativus OX=79200 GN=DCAR_006875 PE=3 SV=1	K01714	dapA	GO:0043648(biological_process:dicarboxylic acid metabolic process); GO:0008840(molecular_function:4-hydroxy-tetrahydrodipicolinate synthase); GO:0019752(biological_process:carboxylic acid metabolic process); GO:0016053(biological_process:organic acid biosynthetic process); GO:0044249(biological_process:cellular biosynthetic process); GO:0006807(biological_process:nitrogen compound metabolic proce…	map00300(Lysine biosynthesis); map00261(Monobactam biosynthesis)	COG0329(E:Amino acid transport and metabolism)	PF00701.23(DHDPS:Dihydrodipicolinate synthetase family)	peroxisomal	3	15	41.1	High
A0A166AW58	1.57998	0.000451	up	yes	Uncharacterized protein OS=Daucus carota subsp. sativus OX=79200 GN=DCAR_010766 PE=4 SV=1			GO:0046983(molecular_function:protein dimerization activity); GO:0003674(molecular_function:molecular_function); GO:0005488(molecular_function:binding); GO:0005515(molecular_function:protein binding)		ENOG410YG6S(K:Transcription); ENOG41118GE(K:Transcription)	PF00400.33(WD40:WD domain, G-beta repeat); PF12894.8(ANAPC4_WD40:Anaphase-promoting complex subunit 4 WD40 domain); PF00010.27(HLH:Helix-loop-helix DNA-binding domain)	cytoplasmic	2	4	58.2	High
A0A164YFY9	1.525	0.001614	up	yes	Uncharacterized protein OS=Daucus carota subsp. sativus OX=79200 GN=DCAR_017698 PE=4 SV=1					ENOG410Z7Z7(K:Transcription)	PF13041.7(PPR_2:PPR repeat family); PF01535.21(PPR:PPR repeat); PF12854.8(PPR_1:PPR repeat); PF13812.7(PPR_3:Pentatricopeptide repeat domain); PF17177.5(PPR_long:Pentacotripeptide-repeat region of PRORP)	cytoplasmic	4	6	88.8	High
A0A161YD80	1.61976	3e-06	up	yes	Uncharacterized protein OS=Daucus carota subsp. sativus OX=79200 GN=DCAR_021976 PE=3 SV=1	K17607	TIPRL, TIP41	GO:0033643(cellular_component:host cell part); GO:0019220(biological_process:regulation of phosphate metabolic process); GO:0080090(biological_process:regulation of primary metabolic process); GO:0019222(biological_process:regulation of metabolic process); GO:0010921(biological_process:regulation of phosphatase activity); GO:0031323(biological_process:regulation of cellular metabolic process); GO…		ENOG410XT96(S:Function unknown)	PF04176.14(TIP41:TIP41-like family)	nuclear	2	7	31.1	High
A0A164ZBA3	1.511	0.002106	up	yes	Uncharacterized protein OS=Daucus carota subsp. sativus OX=79200 GN=DCAR_018899 PE=4 SV=1			GO:0005575(cellular_component:cellular_component); GO:0050896(biological_process:response to stimulus); GO:0006952(biological_process:defense response); GO:0006950(biological_process:response to stress); GO:0005576(cellular_component:extracellular region); GO:0008150(biological_process:biological_process); GO:0110165(cellular_component:cellular anatomical entity)		ENOG410YFST(S:Function unknown)	PF00314.18(Thaumatin:Thaumatin family)	extracellular	1	4	26.7	High
A0A166A623	1.73958	0.000271	up	yes	Catalase OS=Daucus carota subsp. sativus OX=79200 GN=DCAR_009536 PE=3 SV=1	K03781	katE, CAT, catB, srpA	GO:0000302(biological_process:response to reactive oxygen species); GO:0044248(biological_process:cellular catabolic process); GO:0042579(cellular_component:microbody); GO:0043229(cellular_component:intracellular organelle); GO:0042744(biological_process:hydrogen peroxide catabolic process); GO:0003674(molecular_function:molecular_function); GO:0005488(molecular_function:binding); GO:0043167(mole…	map00630(Glyoxylate and dicarboxylate metabolism); map04016(MAPK signaling pathway - plant); map00380(Tryptophan metabolism); map04146(Peroxisome)	COG0753(P:Inorganic ion transport and metabolism)	PF00199.20(Catalase:Catalase); PF06628.13(Catalase-rel:Catalase-related immune-responsive)	chloroplast	12	45	56.6	High
A0A166EQ01	1.69354	2.6e-05	up	yes	DUF2470 domain-containing protein OS=Daucus carota subsp. sativus OX=79200 GN=DCAR_007669 PE=4 SV=1			GO:1901463(biological_process:regulation of tetrapyrrole biosynthetic process); GO:0009893(biological_process:positive regulation of metabolic process); GO:0019222(biological_process:regulation of metabolic process); GO:0031328(biological_process:positive regulation of cellular biosynthetic process); GO:0031326(biological_process:regulation of cellular biosynthetic process); GO:0031325(biological…		ENOG410XX7U(S:Function unknown)	PF10615.10(DUF2470:Protein of unknown function (DUF2470))	chloroplast	1	3	39.9	High
A0A164U4U1	1.6002	0.001013	up	yes	Uncharacterized protein OS=Daucus carota subsp. sativus OX=79200 GN=DCAR_025503 PE=4 SV=1	K12812	DDX39B, UAP56, SUB2	GO:0005488(molecular_function:binding); GO:0003676(molecular_function:nucleic acid binding); GO:0035639(molecular_function:purine ribonucleoside triphosphate binding); GO:0090304(biological_process:nucleic acid metabolic process); GO:0032553(molecular_function:ribonucleotide binding); GO:0034641(biological_process:cellular nitrogen compound metabolic process); GO:0006807(biological_process:nitrog…	map03013(RNA transport); map03015(mRNA surveillance pathway); map03040(Spliceosome)	COG0513(K:Transcription)	PF00270.30(DEAD:DEAD/DEAH box helicase); PF00271.32(Helicase_C:Helicase conserved C-terminal domain); PF04851.16(ResIII:Type III restriction enzyme, res subunit)	nuclear	2	39	39.6	High
A0A162AHV6	1.67842	6.5e-05	up	yes	TOG domain-containing protein OS=Daucus carota subsp. sativus OX=79200 GN=DCAR_001982 PE=4 SV=1	K20222	IPO5, KPNB3, RANBP5	GO:0034504(biological_process:protein localization to nucleus); GO:0051169(biological_process:nuclear transport); GO:0008104(biological_process:protein localization); GO:0019899(molecular_function:enzyme binding); GO:0031267(molecular_function:small GTPase binding); GO:0043229(cellular_component:intracellular organelle); GO:0003674(molecular_function:molecular_function); GO:0005488(molecular_func…		ENOG410XQAJ(U:Intracellular trafficking, secretion, and vesicular transport)	PF18808.2(Importin_rep_4:Importin repeat); PF13513.7(HEAT_EZ:HEAT-like repeat); PF13646.7(HEAT_2:HEAT repeats); PF02985.23(HEAT:HEAT repeat); PF18829.2(Importin_rep_6:Importin repeat 6); PF12755.8(Vac14_Fab1_bd:Vacuolar 14 Fab1-binding region); PF12717.8(Cnd1:non-SMC mitotic condensation complex subunit 1)	cytoplasmic	6	7	121.1	High
A0A166CFZ0	1.51198	0.003745	up	yes	C3H1-type domain-containing protein OS=Daucus carota subsp. sativus OX=79200 GN=DCAR_012478 PE=4 SV=1			GO:0043169(molecular_function:cation binding); GO:0097159(molecular_function:organic cyclic compound binding); GO:0043167(molecular_function:ion binding); GO:0003674(molecular_function:molecular_function); GO:0003723(molecular_function:RNA binding); GO:0003676(molecular_function:nucleic acid binding); GO:0046872(molecular_function:metal ion binding); GO:1901363(molecular_function:heterocyclic com…		COG5063(S:Function unknown)		cytoplasmic	1	11	15.6	High
A0A166JBF6	1.6577	0.000646	up	yes	Uncharacterized protein OS=Daucus carota subsp. sativus OX=79200 GN=DCAR_004645 PE=3 SV=1	K00799	GST, gst	GO:0003824(molecular_function:catalytic activity); GO:0016740(molecular_function:transferase activity); GO:0003674(molecular_function:molecular_function)	map00480(Glutathione metabolism)	COG0625(G:Carbohydrate transport and metabolism)	PF02798.21(GST_N:Glutathione S-transferase, N-terminal domain); PF13409.7(GST_N_2:Glutathione S-transferase, N-terminal domain); PF13417.7(GST_N_3:Glutathione S-transferase, N-terminal domain); PF13410.7(GST_C_2:Glutathione S-transferase, C-terminal domain)	cytoplasmic	3	8	53.5	High
A0A165ZWK5	1.75105	3.5e-05	up	yes	TPR_REGION domain-containing protein OS=Daucus carota subsp. sativus OX=79200 GN=DCAR_009261 PE=4 SV=1			GO:0005575(cellular_component:cellular_component); GO:0016021(cellular_component:integral component of membrane); GO:0110165(cellular_component:cellular anatomical entity); GO:0031224(cellular_component:intrinsic component of membrane)		ENOG4111WQ2(S:Function unknown)	PF14559.7(TPR_19:Tetratricopeptide repeat); PF13432.7(TPR_16:Tetratricopeptide repeat)	chloroplast	6	20	39.5	High
A0A166IQA5	1.56765	0.03395	up	yes	Uncharacterized protein OS=Daucus carota subsp. sativus OX=79200 GN=DCAR_004027 PE=3 SV=1	K07555	ATPeAF1, ATPAF1, ATP11	GO:0005575(cellular_component:cellular_component); GO:0022607(biological_process:cellular component assembly); GO:0043231(cellular_component:intracellular membrane-bounded organelle); GO:0043933(biological_process:macromolecular complex subunit organization); GO:0009987(biological_process:cellular process); GO:0016043(biological_process:cellular component organization); GO:0110165(cellular_compon…		ENOG4111CKE(O:Posttranslational modification, protein turnover, chaperones)	PF06644.12(ATP11:ATP11 protein)	mitochondrial	1	3	23	Medium
A0A166HC73	1.65467	0.001264	up	yes	Uncharacterized protein OS=Daucus carota subsp. sativus OX=79200 GN=DCAR_002727 PE=3 SV=1	K02964	RP-S18e, RPS18	GO:1901566(biological_process:organonitrogen compound biosynthetic process); GO:0044238(biological_process:primary metabolic process); GO:0034645(biological_process:cellular macromolecule biosynthetic process); GO:1901363(molecular_function:heterocyclic compound binding); GO:0043226(cellular_component:organelle); GO:0044249(biological_process:cellular biosynthetic process); GO:0043229(cellular_co…	map03010(Ribosome)	COG0099(J:Translation, ribosomal structure and biogenesis)	PF00416.23(Ribosomal_S13:Ribosomal protein S13/S18)	chloroplast	9	61	17.6	High
A0A164ZNC9	1.60239	0.002607	up	yes	MI domain-containing protein OS=Daucus carota subsp. sativus OX=79200 GN=DCAR_019406 PE=4 SV=1	K03260	EIF4G	GO:0005488(molecular_function:binding); GO:0090079(molecular_function:translation regulator activity, nucleic acid binding); GO:0032991(cellular_component:macromolecular complex); GO:0045182(molecular_function:translation regulator activity); GO:0097159(molecular_function:organic cyclic compound binding); GO:0016281(cellular_component:eukaryotic translation initiation factor 4F complex); GO:00081…	map03013(RNA transport)	ENOG410XS4P(J:Translation, ribosomal structure and biogenesis)	PF02854.20(MIF4G:MIF4G domain); PF02847.18(MA3:MA3 domain)	cytoplasmic	6	9	90	High
A0A164UIS5	1.58952	0.000541	up	yes	UDP-glucose 6-dehydrogenase OS=Daucus carota subsp. sativus OX=79200 GN=DCAR_026011 PE=3 SV=1	K00012	UGDH, ugd	GO:0030203(biological_process:glycosaminoglycan metabolic process); GO:0051287(molecular_function:NAD binding); GO:1901363(molecular_function:heterocyclic compound binding); GO:0043229(cellular_component:intracellular organelle); GO:0006807(biological_process:nitrogen compound metabolic process); GO:0003674(molecular_function:molecular_function); GO:0005488(molecular_function:binding); GO:0003979…	map00520(Amino sugar and nucleotide sugar metabolism); map00040(Pentose and glucuronate interconversions); map00053(Ascorbate and aldarate metabolism)	COG1004(F:Nucleotide transport and metabolism)	PF03721.15(UDPG_MGDP_dh_N:UDP-glucose/GDP-mannose dehydrogenase family, NAD binding domain); PF03720.16(UDPG_MGDP_dh_C:UDP-glucose/GDP-mannose dehydrogenase family, UDP binding domain); PF00984.20(UDPG_MGDP_dh:UDP-glucose/GDP-mannose dehydrogenase family, central domain)	cytoplasmic	1	21	52.7	High
A0A165Y8Q5	1.58853	3.2e-05	up	yes	Uncharacterized protein OS=Daucus carota subsp. sativus OX=79200 GN=DCAR_013745 PE=4 SV=1	K14552	NAN1, UTP17, WDR75		map03008(Ribosome biogenesis in eukaryotes)	ENOG410YY9G(S:Function unknown)	PF00400.33(WD40:WD domain, G-beta repeat)	cytoplasmic	4	5	96.2	High
A0A161XAX4	1.62173	0.000721	up	yes	40S ribosomal protein S3a OS=Daucus carota subsp. sativus OX=79200 GN=DCAR_022874 PE=3 SV=1	K02984	RP-S3Ae, RPS3A	GO:0044238(biological_process:primary metabolic process); GO:0022627(cellular_component:cytosolic small ribosomal subunit); GO:0044249(biological_process:cellular biosynthetic process); GO:0034641(biological_process:cellular nitrogen compound metabolic process); GO:0006807(biological_process:nitrogen compound metabolic process); GO:0003674(molecular_function:molecular_function); GO:0034645(biolog…	map03010(Ribosome)	COG1890(J:Translation, ribosomal structure and biogenesis)	PF01015.19(Ribosomal_S3Ae:Ribosomal S3Ae family)	cytoplasmic	3	54	29.8	High
A0A164UEP0	1.64092	0.000593	up	yes	Peptidase_M3 domain-containing protein OS=Daucus carota subsp. sativus OX=79200 GN=DCAR_025863 PE=3 SV=1	K01414	prlC	GO:0004175(molecular_function:endopeptidase activity); GO:0034641(biological_process:cellular nitrogen compound metabolic process); GO:0006807(biological_process:nitrogen compound metabolic process); GO:0003674(molecular_function:molecular_function); GO:0005488(molecular_function:binding); GO:0008233(molecular_function:peptidase activity); GO:0043227(cellular_component:membrane-bounded organelle)…		COG0339(E:Amino acid transport and metabolism)	PF01432.21(Peptidase_M3:Peptidase family M3)	cytoplasmic	14	48	78.6	High
A0A165WTR1	1.52901	0.00277	up	yes	Uncharacterized protein OS=Daucus carota subsp. sativus OX=79200 GN=DCAR_014987 PE=4 SV=1	K11294	NCL, NSR1	GO:0005488(molecular_function:binding); GO:0006869(biological_process:lipid transport); GO:0097159(molecular_function:organic cyclic compound binding); GO:0016021(cellular_component:integral component of membrane); GO:0006810(biological_process:transport); GO:0008289(molecular_function:lipid binding); GO:1901363(molecular_function:heterocyclic compound binding); GO:0005575(cellular_component:cell…		ENOG410XZHK(S:Function unknown); COG0724(S:Function unknown)	PF00076.23(RRM_1:RNA recognition motif. (a.k.a. RRM, RBD, or RNP domain))	chloroplast	4	24	30.2	High
A0A166ID45	1.52657	0.001552	up	yes	40S ribosomal protein S25 OS=Daucus carota subsp. sativus OX=79200 GN=DCAR_003662 PE=3 SV=1	K02975	RP-S25e, RPS25	GO:0043229(cellular_component:intracellular organelle); GO:0043228(cellular_component:non-membrane-bounded organelle); GO:0003674(molecular_function:molecular_function); GO:0005488(molecular_function:binding); GO:0003676(molecular_function:nucleic acid binding); GO:0043226(cellular_component:organelle); GO:0004540(molecular_function:ribonuclease activity); GO:0004521(molecular_function:endoribonu…	map03010(Ribosome)	COG4901(U:Intracellular trafficking, secretion, and vesicular transport)	PF03297.16(Ribosomal_S25:S25 ribosomal protein)	chloroplast	4	57	12	High
A0A175YCL2	1.5217	0.000322	up	yes	ATP-grasp domain-containing protein OS=Daucus carota subsp. sativus OX=79200 GN=DCAR_028952 PE=4 SV=1	K11808	ADE2	GO:0009167(biological_process:purine ribonucleoside monophosphate metabolic process); GO:0009165(biological_process:nucleotide biosynthetic process); GO:0044281(biological_process:small molecule metabolic process); GO:0009161(biological_process:ribonucleoside monophosphate metabolic process); GO:1901362(biological_process:organic cyclic compound biosynthetic process); GO:1901363(molecular_functio…	map00230(Purine metabolism)	COG0026(F:Nucleotide transport and metabolism)	PF02222.23(ATP-grasp:ATP-grasp domain)	chloroplast	1	19	24	High
A0A161YA61	1.54678	0.000421	up	yes	Lipase_3 domain-containing protein OS=Daucus carota subsp. sativus OX=79200 GN=DCAR_026434 PE=4 SV=1			GO:0071704(biological_process:organic substance metabolic process); GO:0016787(molecular_function:hydrolase activity); GO:0044238(biological_process:primary metabolic process); GO:0004806(molecular_function:triglyceride lipase activity); GO:0006629(biological_process:lipid metabolic process); GO:0016788(molecular_function:hydrolase activity, acting on ester bonds); GO:0016021(cellular_component:i…		COG3675(S:Function unknown)	PF01764.26(Lipase_3:Lipase (class 3))	cytoplasmic	8	17	59.9	High
A0A164ZDF4	1.61039	0.001291	up	yes	Uncharacterized protein OS=Daucus carota subsp. sativus OX=79200 GN=DCAR_019007 PE=4 SV=1	K06174	ABCE1, Rli1	GO:0015931(biological_process:nucleobase-containing compound transport); GO:0051169(biological_process:nuclear transport); GO:0008104(biological_process:protein localization); GO:0043933(biological_process:macromolecular complex subunit organization); GO:0044237(biological_process:cellular metabolic process); GO:0033750(biological_process:ribosome localization); GO:0050657(biological_process:nucl…		COG1245(S:Function unknown)	PF00005.28(ABC_tran:ABC transporter); PF04068.16(RLI:Possible Fer4-like domain in RNase L inhibitor, RLI); PF02463.20(SMC_N:RecF/RecN/SMC N terminal domain); PF13304.7(AAA_21:AAA domain, putative AbiEii toxin, Type IV TA system); PF00037.28(Fer4:4Fe-4S binding domain); PF13175.7(AAA_15:AAA ATPase domain); PF05729.13(NACHT:NACHT domain)	cytoplasmic	4	7	68.2	High
A0A165XFU2	1.58614	0	up	yes	Uncharacterized protein OS=Daucus carota subsp. sativus OX=79200 GN=DCAR_014507 PE=4 SV=1	K03233	EEF1G	GO:0090079(molecular_function:translation regulator activity, nucleic acid binding); GO:0045182(molecular_function:translation regulator activity); GO:0097159(molecular_function:organic cyclic compound binding); GO:0008135(molecular_function:translation factor activity, RNA binding); GO:0003674(molecular_function:molecular_function); GO:0003723(molecular_function:RNA binding); GO:0003676(molecula…		COG0625(S:Function unknown)	PF00647.20(EF1G:Elongation factor 1 gamma, conserved domain); PF02798.21(GST_N:Glutathione S-transferase, N-terminal domain); PF00043.26(GST_C:Glutathione S-transferase, C-terminal domain); PF13417.7(GST_N_3:Glutathione S-transferase, N-terminal domain); PF13409.7(GST_N_2:Glutathione S-transferase, N-terminal domain); PF13410.7(GST_C_2:Glutathione S-transferase, C-terminal domain)	cytoplasmic	9	40	47.4	High
A0A161ZV81	1.57087	0.01839	up	yes	UBC core domain-containing protein OS=Daucus carota subsp. sativus OX=79200 GN=DCAR_020723 PE=4 SV=1	K10704	UBE2V	GO:0008152(biological_process:metabolic process); GO:0043412(biological_process:macromolecule modification); GO:0090304(biological_process:nucleic acid metabolic process); GO:0043229(cellular_component:intracellular organelle); GO:0006807(biological_process:nitrogen compound metabolic process); GO:0003674(molecular_function:molecular_function); GO:0043227(cellular_component:membrane-bounded organ…		ENOG4111MDW(J:Translation, ribosomal structure and biogenesis)	PF00179.27(UQ_con:Ubiquitin-conjugating enzyme)	nuclear	2	44	16.6	High
A0A165YHA7	1.56232	0.000684	up	yes	60S ribosomal protein L6 OS=Daucus carota subsp. sativus OX=79200 GN=DCAR_013561 PE=3 SV=1	K02934	RP-L6e, RPL6	GO:0044238(biological_process:primary metabolic process); GO:0015934(cellular_component:large ribosomal subunit); GO:0034645(biological_process:cellular macromolecule biosynthetic process); GO:0022625(cellular_component:cytosolic large ribosomal subunit); GO:0043933(biological_process:macromolecular complex subunit organization); GO:0043226(cellular_component:organelle); GO:0044249(biological_pro…	map03010(Ribosome)		PF01159.20(Ribosomal_L6e:Ribosomal protein L6e); PF03868.16(Ribosomal_L6e_N:Ribosomal protein L6, N-terminal domain)	chloroplast	9	61	25.7	High
A0A165Z476	1.72033	6.5e-05	up	yes	Tr-type G domain-containing protein OS=Daucus carota subsp. sativus OX=79200 GN=DCAR_013050 PE=4 SV=1	K06207	typA, bipA	GO:0035639(molecular_function:purine ribonucleoside triphosphate binding); GO:0043229(cellular_component:intracellular organelle); GO:0003674(molecular_function:molecular_function); GO:0005488(molecular_function:binding); GO:0000166(molecular_function:nucleotide binding); GO:0043227(cellular_component:membrane-bounded organelle); GO:0043226(cellular_component:organelle); GO:0001883(molecular_func…		COG1217(S:Function unknown)	PF00009.28(GTP_EFTU:Elongation factor Tu GTP binding domain); PF00679.25(EFG_C:Elongation factor G C-terminus); PF01926.24(MMR_HSR1:50S ribosome-binding GTPase); PF03144.26(GTP_EFTU_D2:Elongation factor Tu domain 2)	mitochondrial	4	7	72.8	High
A0A166EPQ8	1.69575	2.4e-05	up	yes	Uncharacterized protein OS=Daucus carota subsp. sativus OX=79200 GN=DCAR_007662 PE=3 SV=1			GO:0042273(biological_process:ribosomal large subunit biogenesis); GO:0042274(biological_process:ribosomal small subunit biogenesis); GO:0003674(molecular_function:molecular_function); GO:0043228(cellular_component:non-membrane-bounded organelle); GO:0043232(cellular_component:intracellular non-membrane-bounded organelle); GO:0005730(cellular_component:nucleolus); GO:0097159(molecular_function:or…		ENOG4111G0Y(S:Function unknown)	PF15459.7(RRP14:60S ribosome biogenesis protein Rrp14); PF04935.13(SURF6:Surfeit locus protein 6)	nuclear	1	4	37.9	High
A0A164T7G8	1.5996	0.000104	up	yes	3-isopropylmalate dehydratase OS=Daucus carota subsp. sativus OX=79200 GN=DCAR_024295 PE=4 SV=1	K01703	leuC, IPMI-L	GO:0019752(biological_process:carboxylic acid metabolic process); GO:0043436(biological_process:oxoacid metabolic process); GO:0006807(biological_process:nitrogen compound metabolic process); GO:0003674(molecular_function:molecular_function); GO:0044281(biological_process:small molecule metabolic process); GO:0044283(biological_process:small molecule biosynthetic process); GO:1901576(biological_p…	map00660(C5-Branched dibasic acid metabolism); map00966(Glucosinolate biosynthesis); map00290(Valine, leucine and isoleucine biosynthesis)	COG0065(E:Amino acid transport and metabolism)	PF00330.21(Aconitase:Aconitase family (aconitate hydratase))	cytoplasmic	2	15	57.7	High
A0A175YJY5	1.6012	2.2e-05	up	yes	Uncharacterized protein OS=Daucus carota subsp. sativus OX=79200 GN=DCAR_028542 PE=4 SV=1							nuclear	1	2	39.6	Medium
A0A164Y6G3	1.55436	0.000486	up	yes	Uncharacterized protein OS=Daucus carota subsp. sativus OX=79200 GN=DCAR_017293 PE=3 SV=1	K14544	UTP22, NOL6	GO:0015931(biological_process:nucleobase-containing compound transport); GO:0051169(biological_process:nuclear transport); GO:0032040(cellular_component:small-subunit processome); GO:0030684(cellular_component:preribosome); GO:0090304(biological_process:nucleic acid metabolic process); GO:0043229(cellular_component:intracellular organelle); GO:0043228(cellular_component:non-membrane-bounded organ…	map03008(Ribosome biogenesis in eukaryotes)	ENOG410XPP9(S:Function unknown)	PF17405.3(Nrap_D4:Nrap protein nucleotidyltransferase domain 4); PF03813.15(Nrap:Nrap protein domain 1); PF17404.3(Nrap_D3:Nrap protein domain 3); PF17406.3(Nrap_D5:Nrap protein PAP/OAS1-like domain 5); PF17407.3(Nrap_D6:Nrap protein domain 6); PF17403.3(Nrap_D2:Nrap protein PAP/OAS-like domain)	nuclear	4	5	107.9	High
A0A161XES5	1.61647	1e-06	up	yes	Peptidase A1 domain-containing protein OS=Daucus carota subsp. sativus OX=79200 GN=DCAR_021362 PE=4 SV=1			GO:0016787(molecular_function:hydrolase activity); GO:0004175(molecular_function:endopeptidase activity); GO:0140096(molecular_function:catalytic activity, acting on a protein); GO:0070001(molecular_function:aspartic-type peptidase activity); GO:0003824(molecular_function:catalytic activity); GO:0070011(molecular_function:peptidase activity, acting on L-amino acid peptides); GO:0004190(molecular_…			PF14541.7(TAXi_C:Xylanase inhibitor C-terminal)	cytoplasmic	1	9	14.3	Medium
A0A164XTY1	1.73115	0.000406	up	yes	Tr-type G domain-containing protein OS=Daucus carota subsp. sativus OX=79200 GN=DCAR_016826 PE=3 SV=1	K03234	EEF2	GO:0000166(molecular_function:nucleotide binding); GO:0080090(biological_process:regulation of primary metabolic process); GO:0019222(biological_process:regulation of metabolic process); GO:0035639(molecular_function:purine ribonucleoside triphosphate binding); GO:0031326(biological_process:regulation of cellular biosynthetic process); GO:0031323(biological_process:regulation of cellular metaboli…		COG0480(U:Intracellular trafficking, secretion, and vesicular transport)	PF00009.28(GTP_EFTU:Elongation factor Tu GTP binding domain); PF03764.19(EFG_IV:Elongation factor G, domain IV); PF00679.25(EFG_C:Elongation factor G C-terminus); PF14492.7(EFG_III:Elongation Factor G, domain III); PF03144.26(GTP_EFTU_D2:Elongation factor Tu domain 2)	nuclear	24	76	93.7	High
A0A162AW90	1.62451	0.000205	up	yes	Uncharacterized protein OS=Daucus carota subsp. sativus OX=79200 GN=DCAR_007560 PE=4 SV=1	K09489	HSPA4	GO:0043231(cellular_component:intracellular membrane-bounded organelle); GO:0005829(cellular_component:cytosol); GO:0043226(cellular_component:organelle); GO:0005575(cellular_component:cellular_component); GO:0043229(cellular_component:intracellular organelle); GO:0043227(cellular_component:membrane-bounded organelle); GO:0005634(cellular_component:nucleus); GO:0110165(cellular_component:cellular…		COG0443(O:Posttranslational modification, protein turnover, chaperones)	PF00012.21(HSP70:Hsp70 protein); PF06723.14(MreB_Mbl:MreB/Mbl protein)	nuclear	11	39	92.9	High
A0A175YPB6	1.52815	0.001179	up	yes	60S ribosomal protein L29 OS=Daucus carota subsp. sativus OX=79200 GN=DCAR_027014 PE=3 SV=1	K02905	RP-L29e, RPL29	GO:0044238(biological_process:primary metabolic process); GO:0015934(cellular_component:large ribosomal subunit); GO:0022625(cellular_component:cytosolic large ribosomal subunit); GO:0043603(biological_process:cellular amide metabolic process); GO:0044249(biological_process:cellular biosynthetic process); GO:0043229(cellular_component:intracellular organelle); GO:0043228(cellular_component:non-me…	map03010(Ribosome)	ENOG4112428(J:Translation, ribosomal structure and biogenesis)	PF01779.18(Ribosomal_L29e:Ribosomal L29e protein family)	chloroplast	1	17	6.9	High
A0A175YD58	1.52718	2.3e-05	up	yes	Coatomer subunit gamma OS=Daucus carota subsp. sativus OX=79200 GN=DCAR_028990 PE=3 SV=1	K17267	COPG	GO:0008104(biological_process:protein localization); GO:0005783(cellular_component:endoplasmic reticulum); GO:0005886(cellular_component:plasma membrane); GO:0043229(cellular_component:intracellular organelle); GO:0003674(molecular_function:molecular_function); GO:0070161(cellular_component:anchoring junction); GO:0043227(cellular_component:membrane-bounded organelle); GO:0043226(cellular_compone…		COG5240(U:Intracellular trafficking, secretion, and vesicular transport)	PF01602.21(Adaptin_N:Adaptin N terminal region); PF08752.11(COP-gamma_platf:Coatomer gamma subunit appendage platform subdomain); PF16381.6(Coatomer_g_Cpla:Coatomer subunit gamma-1 C-terminal appendage platform); PF13646.7(HEAT_2:HEAT repeats); PF12717.8(Cnd1:non-SMC mitotic condensation complex subunit 1)	chloroplast	15	36	99.9	High
A0A166EPJ3	1.54199	0.03562	up	yes	40S ribosomal protein SA OS=Daucus carota subsp. sativus OX=79200 GN=DCAR_007654 PE=3 SV=1	K02998	RP-SAe, RPSA	GO:0022607(biological_process:cellular component assembly); GO:0022627(cellular_component:cytosolic small ribosomal subunit); GO:0043933(biological_process:macromolecular complex subunit organization); GO:0000028(biological_process:ribosomal small subunit assembly); GO:0044249(biological_process:cellular biosynthetic process); GO:0034641(biological_process:cellular nitrogen compound metabolic pro…	map03010(Ribosome)	COG0052(S:Function unknown)	PF00318.21(Ribosomal_S2:Ribosomal protein S2); PF16122.6(40S_SA_C:40S ribosomal protein SA C-terminus)	chloroplast	4	33	29.4	High
A0A162BA60	1.63461	5.1e-05	up	yes	40S ribosomal protein S26 OS=Daucus carota subsp. sativus OX=79200 GN=DCAR_004529 PE=3 SV=1	K02976	RP-S26e, RPS26	GO:1901566(biological_process:organonitrogen compound biosynthetic process); GO:0004175(molecular_function:endopeptidase activity); GO:0022627(cellular_component:cytosolic small ribosomal subunit); GO:1901363(molecular_function:heterocyclic compound binding); GO:0006807(biological_process:nitrogen compound metabolic process); GO:0044249(biological_process:cellular biosynthetic process); GO:004322…	map03010(Ribosome)	COG4830(J:Translation, ribosomal structure and biogenesis)	PF01283.20(Ribosomal_S26e:Ribosomal protein S26e)	chloroplast	2	35	14.4	High
A0A166J0A7	1.72978	0.005954	up	yes	Uncharacterized protein OS=Daucus carota subsp. sativus OX=79200 GN=DCAR_004336 PE=3 SV=1	K13065	E2.3.1.133, HCT	GO:0003824(molecular_function:catalytic activity); GO:0016740(molecular_function:transferase activity); GO:0016746(molecular_function:transferase activity, transferring acyl groups); GO:0016747(molecular_function:transferase activity, transferring acyl groups other than amino-acyl groups); GO:0003674(molecular_function:molecular_function)	map00941(Flavonoid biosynthesis); map00940(Phenylpropanoid biosynthesis); map00945(Stilbenoid, diarylheptanoid and gingerol biosynthesis)	ENOG41113XM(S:Function unknown)	PF02458.16(Transferase:Transferase family)	cytoplasmic	2	4	51.3	High
A0A166D341	1.62828	0.000596	up	yes	40S ribosomal protein S27 OS=Daucus carota subsp. sativus OX=79200 GN=DCAR_003251 PE=3 SV=1	K02978	RP-S27e, RPS27	GO:1901566(biological_process:organonitrogen compound biosynthetic process); GO:0022607(biological_process:cellular component assembly); GO:0034645(biological_process:cellular macromolecule biosynthetic process); GO:0043933(biological_process:macromolecular complex subunit organization); GO:1901363(molecular_function:heterocyclic compound binding); GO:0000028(biological_process:ribosomal small su…	map03010(Ribosome)		PF01667.18(Ribosomal_S27e:Ribosomal protein S27)	chloroplast	3	45	9.6	High
A0A161ZUW1	1.61944	5.6e-05	up	yes	Phosphatidate phosphatase OS=Daucus carota subsp. sativus OX=79200 GN=DCAR_020863 PE=3 SV=1	K15728	LPIN	GO:0016787(molecular_function:hydrolase activity); GO:0016791(molecular_function:phosphatase activity); GO:0016788(molecular_function:hydrolase activity, acting on ester bonds); GO:0042578(molecular_function:phosphoric ester hydrolase activity); GO:0003824(molecular_function:catalytic activity); GO:0003674(molecular_function:molecular_function); GO:0008195(molecular_function:phosphatidate phospha…	map00564(Glycerophospholipid metabolism); map00561(Glycerolipid metabolism)	COG5083(S:Function unknown)	PF08235.14(LNS2:LNS2 (Lipin/Ned1/Smp2)); PF04571.15(Lipin_N:lipin, N-terminal conserved region); PF16876.6(Lipin_mid:Lipin/Ned1/Smp2 multi-domain protein middle domain)	cytoplasmic	3	3	101.4	High
A0A164VRQ2	1.6544	0.000483	up	yes	Uncharacterized protein OS=Daucus carota subsp. sativus OX=79200 GN=DCAR_021881 PE=3 SV=1	K15400	HHT1	GO:0003824(molecular_function:catalytic activity); GO:0016740(molecular_function:transferase activity); GO:0016746(molecular_function:transferase activity, transferring acyl groups); GO:0016747(molecular_function:transferase activity, transferring acyl groups other than amino-acyl groups); GO:0003674(molecular_function:molecular_function)	map00073(Cutin, suberine and wax biosynthesis)	ENOG41113XM(S:Function unknown)	PF02458.16(Transferase:Transferase family)	cytoplasmic	1	2	47.9	High
A0A165YF62	1.58724	0.000549	up	yes	Uncharacterized protein OS=Daucus carota subsp. sativus OX=79200 GN=DCAR_013603 PE=4 SV=1	K12586	RRP43, EXOSC8, OIP2	GO:0071046(biological_process:nuclear polyadenylation-dependent ncRNA catabolic process); GO:0071047(biological_process:polyadenylation-dependent mRNA catabolic process); GO:0071042(biological_process:nuclear polyadenylation-dependent mRNA catabolic process); GO:0019222(biological_process:regulation of metabolic process); GO:0000459(biological_process:exonucleolytic trimming involved in rRNA proc…	map03018(RNA degradation)	COG2123(E:Amino acid transport and metabolism); COG1429(H:Coenzyme transport and metabolism)	PF01138.22(RNase_PH:3' exoribonuclease family, domain 1); PF03725.16(RNase_PH_C:3' exoribonuclease family, domain 2)	cytoplasmic	2	6	32.8	High
A0A166G7X8	1.61906	0.002252	up	yes	Signal recognition particle receptor subunit beta OS=Daucus carota subsp. sativus OX=79200 GN=DCAR_001175 PE=3 SV=1	K12272	SRPRB, SRP102	GO:0035639(molecular_function:purine ribonucleoside triphosphate binding); GO:0003674(molecular_function:molecular_function); GO:0005488(molecular_function:binding); GO:0001883(molecular_function:purine nucleoside binding); GO:0043167(molecular_function:ion binding); GO:1901363(molecular_function:heterocyclic compound binding); GO:1901265(molecular_function:nucleoside phosphate binding); GO:00018…	map03060(Protein export)	COG2229(S:Function unknown)	PF09439.11(SRPRB:Signal recognition particle receptor beta subunit); PF00025.22(Arf:ADP-ribosylation factor family); PF04670.13(Gtr1_RagA:Gtr1/RagA G protein conserved region); PF08477.14(Roc:Ras of Complex, Roc, domain of DAPkinase); PF00009.28(GTP_EFTU:Elongation factor Tu GTP binding domain); PF01926.24(MMR_HSR1:50S ribosome-binding GTPase)	Golgi apparatus	3	16	26.9	High
A0A166CG97	1.56832	0.001276	up	yes	Uncharacterized protein OS=Daucus carota subsp. sativus OX=79200 GN=DCAR_012490 PE=3 SV=1					ENOG4111RXD(S:Function unknown)	PF04927.13(SMP:Seed maturation protein)	cytoplasmic	9	56	25	High
A0A166IET3	1.55315	1.2e-05	up	yes	Aspartokinase OS=Daucus carota subsp. sativus OX=79200 GN=DCAR_003713 PE=3 SV=1	K12524	thrA	GO:0019202(molecular_function:amino acid kinase activity); GO:1901607(biological_process:alpha-amino acid biosynthetic process); GO:0005524(molecular_function:ATP binding); GO:0035639(molecular_function:purine ribonucleoside triphosphate binding); GO:0043648(biological_process:dicarboxylic acid metabolic process); GO:1901605(biological_process:alpha-amino acid metabolic process); GO:0019752(biolo…	map00270(Cysteine and methionine metabolism); map00300(Lysine biosynthesis); map00260(Glycine, serine and threonine metabolism); map00261(Monobactam biosynthesis)	COG0460(S:Function unknown)	PF00742.20(Homoserine_dh:Homoserine dehydrogenase); PF00696.29(AA_kinase:Amino acid kinase family); PF03447.17(NAD_binding_3:Homoserine dehydrogenase, NAD binding domain); PF01842.26(ACT:ACT domain); PF13840.7(ACT_7:ACT domain)	chloroplast	15	22	95.5	High
A0A166AC08	1.65558	4.4e-05	up	yes	Cysteine dioxygenase OS=Daucus carota subsp. sativus OX=79200 GN=DCAR_009774 PE=3 SV=1	K10712	ADO	GO:0051213(molecular_function:dioxygenase activity); GO:0016702(molecular_function:oxidoreductase activity, acting on single donors with incorporation of molecular oxygen, incorporation of two atoms of oxygen); GO:0016701(molecular_function:oxidoreductase activity, acting on single donors with incorporation of molecular oxygen); GO:0003824(molecular_function:catalytic activity); GO:0003674(molecu…	map00430(Taurine and hypotaurine metabolism)	ENOG4111Y3H(J:Translation, ribosomal structure and biogenesis)	PF07847.13(PCO_ADO:PCO_ADO)	cytoplasmic	1	7	26.2	High
A0A166DBF7	1.66171	0.000195	up	yes	RanBD1 domain-containing protein OS=Daucus carota subsp. sativus OX=79200 GN=DCAR_005883 PE=4 SV=1	K15306	RANBP1	GO:0035639(molecular_function:purine ribonucleoside triphosphate binding); GO:0003674(molecular_function:molecular_function); GO:0005488(molecular_function:binding); GO:0043167(molecular_function:ion binding); GO:1901363(molecular_function:heterocyclic compound binding); GO:1901265(molecular_function:nucleoside phosphate binding); GO:0043168(molecular_function:anion binding); GO:0000166(molecular…		COG5171(U:Intracellular trafficking, secretion, and vesicular transport)	PF00638.19(Ran_BP1:RanBP1 domain); PF00568.24(WH1:WH1 domain)	chloroplast	3	30	24.7	High
A0A165YG04	1.61505	9.9e-05	up	yes	Uncharacterized protein OS=Daucus carota subsp. sativus OX=79200 GN=DCAR_013594 PE=3 SV=1	K06617	E2.4.1.82	GO:0016787(molecular_function:hydrolase activity); GO:0052692(molecular_function:raffinose alpha-galactosidase activity); GO:0015925(molecular_function:galactosidase activity); GO:0016798(molecular_function:hydrolase activity, acting on glycosyl bonds); GO:0003824(molecular_function:catalytic activity); GO:0016740(molecular_function:transferase activity); GO:0004557(molecular_function:alpha-galac…	map00052(Galactose metabolism)	ENOG410YBU9(S:Function unknown)	PF05691.13(Raffinose_syn:Raffinose synthase or seed imbibition protein Sip1)	peroxisomal	10	17	83.1	High
A0A166AJN3	1.52386	0.000207	up	yes	Coatomer subunit beta OS=Daucus carota subsp. sativus OX=79200 GN=DCAR_010118 PE=4 SV=1	K17301	COPB1, SEC26	GO:0008104(biological_process:protein localization); GO:0015833(biological_process:peptide transport); GO:0003674(molecular_function:molecular_function); GO:0042886(biological_process:amide transport); GO:0006888(biological_process:ER to Golgi vesicle-mediated transport); GO:0031090(cellular_component:organelle membrane); GO:0006886(biological_process:intracellular protein transport); GO:0016020(…		COG5096(S:Function unknown)	PF01602.21(Adaptin_N:Adaptin N terminal region); PF07718.13(Coatamer_beta_C:Coatomer beta C-terminal region); PF14806.7(Coatomer_b_Cpla:Coatomer beta subunit appendage platform)	cytoplasmic	10	31	103.1	High
A0A161Y5N4	1.6306	0.000242	up	yes	Serine hydroxymethyltransferase OS=Daucus carota subsp. sativus OX=79200 GN=DCAR_005484 PE=3 SV=1	K00600	glyA, SHMT	GO:0044281(biological_process:small molecule metabolic process); GO:0044282(biological_process:small molecule catabolic process); GO:0044283(biological_process:small molecule biosynthetic process); GO:0016597(molecular_function:amino acid binding); GO:1901363(molecular_function:heterocyclic compound binding); GO:1901360(biological_process:organic cyclic compound metabolic process); GO:0051716(bio…	map00460(Cyanoamino acid metabolism); map00630(Glyoxylate and dicarboxylate metabolism); map00670(One carbon pool by folate); map00260(Glycine, serine and threonine metabolism)	COG0112(S:Function unknown)	PF00464.20(SHMT:Serine hydroxymethyltransferase)	chloroplast	20	46	51.8	High
A0A166FKH4	1.73284	0.004654	up	yes	TPR_REGION domain-containing protein OS=Daucus carota subsp. sativus OX=79200 GN=DCAR_000557 PE=4 SV=1			GO:0031072(molecular_function:heat shock protein binding); GO:0003674(molecular_function:molecular_function); GO:0051879(molecular_function:Hsp90 protein binding); GO:0005488(molecular_function:binding); GO:0005515(molecular_function:protein binding)		COG0457(S:Function unknown)	PF00515.29(TPR_1:Tetratricopeptide repeat); PF07719.18(TPR_2:Tetratricopeptide repeat); PF13432.7(TPR_16:Tetratricopeptide repeat); PF13428.7(TPR_14:Tetratricopeptide repeat); PF18972.1(Wheel:Cns1/TTC4 Wheel domain); PF13414.7(TPR_11:TPR repeat); PF14559.7(TPR_19:Tetratricopeptide repeat)	cytoplasmic	2	8	28.4	High
A0A162AWB9	1.57669	0.000418	up	yes	Profilin OS=Daucus carota subsp. sativus OX=79200 GN=DCAR_007590 PE=3 SV=1	K05759	PFN	GO:0005856(cellular_component:cytoskeleton); GO:0005575(cellular_component:cellular_component); GO:0043232(cellular_component:intracellular non-membrane-bounded organelle); GO:0008092(molecular_function:cytoskeletal protein binding); GO:0005737(cellular_component:cytoplasm); GO:0003779(molecular_function:actin binding); GO:0043229(cellular_component:intracellular organelle); GO:0043228(cellular_c…		ENOG41126PD(O:Posttranslational modification, protein turnover, chaperones)	PF00235.20(Profilin:Profilin)	cytoplasmic	4	66	14.4	High
A0A161XFA2	1.62602	0.000191	up	yes	HATPase_c domain-containing protein OS=Daucus carota subsp. sativus OX=79200 GN=DCAR_021102 PE=3 SV=1	K09487	HSP90B, TRA1	GO:0006457(biological_process:protein folding); GO:0035639(molecular_function:purine ribonucleoside triphosphate binding); GO:1901363(molecular_function:heterocyclic compound binding); GO:0043229(cellular_component:intracellular organelle); GO:0003674(molecular_function:molecular_function); GO:0051082(molecular_function:unfolded protein binding); GO:0043167(molecular_function:ion binding); GO:004…	map04626(Plant-pathogen interaction); map04141(Protein processing in endoplasmic reticulum)	COG0326(O:Posttranslational modification, protein turnover, chaperones)	PF00183.19(HSP90:Hsp90 protein); PF02518.27(HATPase_c:Histidine kinase-, DNA gyrase B-, and HSP90-like ATPase); PF13589.7(HATPase_c_3:Histidine kinase-, DNA gyrase B-, and HSP90-like ATPase)	mitochondrial	22	41	91.3	High
A0A166JEW7	1.59029	2e-06	up	yes	PKS_ER domain-containing protein OS=Daucus carota subsp. sativus OX=79200 GN=DCAR_004745 PE=4 SV=1	K00224	CEQORH	GO:0003824(molecular_function:catalytic activity); GO:0003674(molecular_function:molecular_function); GO:0016491(molecular_function:oxidoreductase activity)	map00592(alpha-Linolenic acid metabolism)	COG0604(J:Translation, ribosomal structure and biogenesis)	PF13602.7(ADH_zinc_N_2:Zinc-binding dehydrogenase); PF00107.27(ADH_zinc_N:Zinc-binding dehydrogenase); PF08240.13(ADH_N:Alcohol dehydrogenase GroES-like domain)	peroxisomal	15	61	34.9	High
A0A161XEK6	1.52	0.000391	up	yes	Succinate dehydrogenase [ubiquinone] flavoprotein subunit, mitochondrial OS=Daucus carota subsp. sativus OX=79200 GN=DCAR_021442 PE=3 SV=1	K00234	SDHA, SDH1	GO:0006099(biological_process:tricarboxylic acid cycle); GO:0003674(molecular_function:molecular_function); GO:0005488(molecular_function:binding); GO:0006091(biological_process:generation of precursor metabolites and energy); GO:0043167(molecular_function:ion binding); GO:1901363(molecular_function:heterocyclic compound binding); GO:1901265(molecular_function:nucleoside phosphate binding); GO:00…	map00020(Citrate cycle (TCA cycle)); map00190(Oxidative phosphorylation)	COG1053(C:Energy production and conversion)	PF00890.25(FAD_binding_2:FAD binding domain); PF02910.21(Succ_DH_flav_C:Fumarate reductase flavoprotein C-term)	chloroplast	1	27	66.6	High
A0A175YQE9	1.65689	0.000359	up	yes	Uncharacterized protein OS=Daucus carota subsp. sativus OX=79200 GN=DCAR_026723 PE=4 SV=1	K03456	PPP2R1	GO:0016311(biological_process:dephosphorylation); GO:0006470(biological_process:protein dephosphorylation); GO:0019208(molecular_function:phosphatase regulator activity); GO:1903293(cellular_component:phosphatase complex); GO:0006807(biological_process:nitrogen compound metabolic process); GO:0003674(molecular_function:molecular_function); GO:0098772(molecular_function:molecular function regulato…	map03015(mRNA surveillance pathway)	ENOG410XQVI(T:Signal transduction mechanisms)	PF02985.23(HEAT:HEAT repeat); PF13646.7(HEAT_2:HEAT repeats); PF13513.7(HEAT_EZ:HEAT-like repeat); PF12755.8(Vac14_Fab1_bd:Vacuolar 14 Fab1-binding region); PF01602.21(Adaptin_N:Adaptin N terminal region)	cytoplasmic	22	58	65.3	High
A0A161ZYQ6	1.56816	7e-06	up	yes	Valyl-tRNA synthetase OS=Daucus carota subsp. sativus OX=79200 GN=DCAR_020225 PE=3 SV=1	K01873	VARS, valS	GO:0016787(molecular_function:hydrolase activity); GO:0035639(molecular_function:purine ribonucleoside triphosphate binding); GO:0006438(biological_process:valyl-tRNA aminoacylation); GO:0019752(biological_process:carboxylic acid metabolic process); GO:0090304(biological_process:nucleic acid metabolic process); GO:0034641(biological_process:cellular nitrogen compound metabolic process); GO:000680…	map00970(Aminoacyl-tRNA biosynthesis)	COG0525(J:Translation, ribosomal structure and biogenesis)	PF00133.23(tRNA-synt_1:tRNA synthetases class I (I, L, M and V)); PF08264.14(Anticodon_1:Anticodon-binding domain of tRNA ligase); PF09334.12(tRNA-synt_1g:tRNA synthetases class I (M)); PF10458.10(Val_tRNA-synt_C:Valyl tRNA synthetase tRNA binding arm); PF13603.7(tRNA-synt_1_2:Leucyl-tRNA synthetase, Domain 2)	chloroplast	22	24	121	High
A0A166H6H5	1.57842	0.002694	up	yes	Acyl carrier protein OS=Daucus carota subsp. sativus OX=79200 GN=DCAR_002438 PE=3 SV=1			GO:0006633(biological_process:fatty acid biosynthetic process); GO:0006631(biological_process:fatty acid metabolic process); GO:0019752(biological_process:carboxylic acid metabolic process); GO:0044249(biological_process:cellular biosynthetic process); GO:0003674(molecular_function:molecular_function); GO:0044281(biological_process:small molecule metabolic process); GO:0044283(biological_process:…		COG0236(I:Lipid transport and metabolism)	PF00550.26(PP-binding:Phosphopantetheine attachment site)	chloroplast	2	12	14.5	High
A0A162B749	1.52102	0.001581	up	yes	DUF4057 domain-containing protein OS=Daucus carota subsp. sativus OX=79200 GN=DCAR_003499 PE=4 SV=1					ENOG4111HUR(S:Function unknown)	PF13266.7(DUF4057:Protein of unknown function (DUF4057))	cytoplasmic	2	7	32.5	High
A0A162AFC4	1.58106	0.000507	up	yes	S5 DRBM domain-containing protein OS=Daucus carota subsp. sativus OX=79200 GN=DCAR_009057 PE=3 SV=1	K02981	RP-S2e, RPS2	GO:0044238(biological_process:primary metabolic process); GO:0015935(cellular_component:small ribosomal subunit); GO:0044249(biological_process:cellular biosynthetic process); GO:0034641(biological_process:cellular nitrogen compound metabolic process); GO:0006807(biological_process:nitrogen compound metabolic process); GO:0003674(molecular_function:molecular_function); GO:0005488(molecular_functi…	map03010(Ribosome)	COG0098(O:Posttranslational modification, protein turnover, chaperones)	PF00333.21(Ribosomal_S5:Ribosomal protein S5, N-terminal domain); PF03719.16(Ribosomal_S5_C:Ribosomal protein S5, C-terminal domain)	chloroplast	5	52	29.7	High
A0A166E4F1	1.60781	0.001691	up	yes	RmlD_sub_bind domain-containing protein OS=Daucus carota subsp. sativus OX=79200 GN=DCAR_006914 PE=4 SV=1			GO:0003824(molecular_function:catalytic activity); GO:0016740(molecular_function:transferase activity); GO:0003674(molecular_function:molecular_function)		COG1091(M:Cell wall/membrane/envelope biogenesis)	PF04321.18(RmlD_sub_bind:RmlD substrate binding domain); PF01370.22(Epimerase:NAD dependent epimerase/dehydratase family); PF16363.6(GDP_Man_Dehyd:GDP-mannose 4,6 dehydratase); PF07993.13(NAD_binding_4:Male sterility protein)	mitochondrial	1	5	35.2	High
A0A162AA29	1.53642	4.4e-05	up	yes	Protein disulfide-isomerase OS=Daucus carota subsp. sativus OX=79200 GN=DCAR_014386 PE=3 SV=1	K09580	PDIA1, P4HB	GO:0006457(biological_process:protein folding); GO:0005783(cellular_component:endoplasmic reticulum); GO:0005788(cellular_component:endoplasmic reticulum lumen); GO:0042592(biological_process:homeostatic process); GO:0043229(cellular_component:intracellular organelle); GO:0003674(molecular_function:molecular_function); GO:0016864(molecular_function:intramolecular oxidoreductase activity, transpos…	map04141(Protein processing in endoplasmic reticulum)	COG0526(O:Posttranslational modification, protein turnover, chaperones)	PF00085.21(Thioredoxin:Thioredoxin); PF13848.7(Thioredoxin_6:Thioredoxin-like domain); PF13098.7(Thioredoxin_2:Thioredoxin-like domain); PF04756.14(OST3_OST6:OST3 / OST6 family, transporter family); PF13899.7(Thioredoxin_7:Thioredoxin-like); PF00578.22(AhpC-TSA:AhpC/TSA family)	ER	6	14	54.8	High
A0A166HXN5	1.54294	0.000181	up	yes	SKP1-like protein OS=Daucus carota subsp. sativus OX=79200 GN=DCAR_003173 PE=3 SV=1	K03094	SKP1, CBF3D	GO:0044248(biological_process:cellular catabolic process); GO:0043229(cellular_component:intracellular organelle); GO:0006807(biological_process:nitrogen compound metabolic process); GO:0003674(molecular_function:molecular_function); GO:0005488(molecular_function:binding); GO:0043632(biological_process:modification-dependent macromolecule catabolic process); GO:0043227(cellular_component:membrane…	map04120(Ubiquitin mediated proteolysis); map04141(Protein processing in endoplasmic reticulum)	COG5201(O:Posttranslational modification, protein turnover, chaperones)	PF01466.20(Skp1:Skp1 family, dimerisation domain); PF03931.16(Skp1_POZ:Skp1 family, tetramerisation domain)	cytoplasmic	3	43	18	High
A0A166GAD0	1.60251	0.000901	up	yes	PCI domain-containing protein OS=Daucus carota subsp. sativus OX=79200 GN=DCAR_001393 PE=3 SV=1	K03035	PSMD12, RPN5	GO:0005737(cellular_component:cytoplasm); GO:0032991(cellular_component:macromolecular complex); GO:1902494(cellular_component:catalytic complex); GO:0005575(cellular_component:cellular_component); GO:1905368(cellular_component:peptidase complex); GO:1905369(cellular_component:endopeptidase complex); GO:0000502(cellular_component:proteasome complex); GO:0110165(cellular_component:cellular anatomi…	map03050(Proteasome)	COG5071(O:Posttranslational modification, protein turnover, chaperones)	PF01399.28(PCI:PCI domain); PF18098.2(RPN5_C:26S proteasome regulatory subunit RPN5 C-terminal domain)	cytoplasmic	20	47	59.8	High
A0A164USI6	1.61042	0.002758	up	yes	Ribosomal_L28e domain-containing protein OS=Daucus carota subsp. sativus OX=79200 GN=DCAR_026372 PE=3 SV=1	K02903	RP-L28e, RPL28	GO:0044238(biological_process:primary metabolic process); GO:0015934(cellular_component:large ribosomal subunit); GO:0022625(cellular_component:cytosolic large ribosomal subunit); GO:0043232(cellular_component:intracellular non-membrane-bounded organelle); GO:0044249(biological_process:cellular biosynthetic process); GO:0034641(biological_process:cellular nitrogen compound metabolic process); GO:…	map03010(Ribosome)	ENOG4111T32(J:Translation, ribosomal structure and biogenesis)	PF01778.18(Ribosomal_L28e:Ribosomal L28e protein family)	cytoplasmic	6	59	15.9	High
A0A164SIV1	1.60315	0.000386	up	yes	Protein-synthesizing GTPase OS=Daucus carota subsp. sativus OX=79200 GN=DCAR_023289 PE=4 SV=1	K03242	EIF2S3	GO:0080090(biological_process:regulation of primary metabolic process); GO:0019222(biological_process:regulation of metabolic process); GO:0045903(biological_process:positive regulation of translational fidelity); GO:1901363(molecular_function:heterocyclic compound binding); GO:0071840(biological_process:cellular component organization or biogenesis); GO:0010604(biological_process:positive regula…	map03013(RNA transport)	COG5257(J:Translation, ribosomal structure and biogenesis)	PF09173.12(eIF2_C:Initiation factor eIF2 gamma, C terminal); PF00009.28(GTP_EFTU:Elongation factor Tu GTP binding domain); PF03144.26(GTP_EFTU_D2:Elongation factor Tu domain 2)	cytoplasmic	5	24	50.7	High
A0A166E678	1.55611	5.6e-05	up	yes	Cytochrome b5 heme-binding domain-containing protein OS=Daucus carota subsp. sativus OX=79200 GN=DCAR_006985 PE=3 SV=1	K23490	CYB5	GO:0005783(cellular_component:endoplasmic reticulum); GO:0055035(cellular_component:plastid thylakoid membrane); GO:0034357(cellular_component:photosynthetic membrane); GO:0043226(cellular_component:organelle); GO:0043229(cellular_component:intracellular organelle); GO:0003674(molecular_function:molecular_function); GO:0005488(molecular_function:binding); GO:0043167(molecular_function:ion binding…		COG5274(C:Energy production and conversion); COG5274(I:Lipid transport and metabolism)	PF00173.29(Cyt-b5:Cytochrome b5-like Heme/Steroid binding domain)	chloroplast	2	23	15.2	High
A0A164WX80	1.51122	0.004882	up	yes	Ubiquitin-like domain-containing protein OS=Daucus carota subsp. sativus OX=79200 GN=DCAR_020247 PE=3 SV=1	K02927	RP-L40e, RPL40	GO:0044389(molecular_function:ubiquitin-like protein ligase binding); GO:0043043(biological_process:peptide biosynthetic process); GO:0019899(molecular_function:enzyme binding); GO:0044248(biological_process:cellular catabolic process); GO:0044249(biological_process:cellular biosynthetic process); GO:0043229(cellular_component:intracellular organelle); GO:0043228(cellular_component:non-membrane-b…	map03010(Ribosome)	COG1552(J:Translation, ribosomal structure and biogenesis)	PF01020.18(Ribosomal_L40e:Ribosomal L40e family); PF00240.24(ubiquitin:Ubiquitin family); PF11976.9(Rad60-SLD:Ubiquitin-2 like Rad60 SUMO-like)	chloroplast	1	10	11.1	High
A0A164UNB6	1.59423	0.001996	up	yes	Pectate lyase OS=Daucus carota subsp. sativus OX=79200 GN=DCAR_026200 PE=3 SV=1	K01728	pel	GO:0048589(biological_process:developmental growth); GO:0010393(biological_process:galacturonan metabolic process); GO:0003674(molecular_function:molecular_function); GO:0005488(molecular_function:binding); GO:0009505(cellular_component:plant-type cell wall); GO:0009653(biological_process:anatomical structure morphogenesis); GO:0043169(molecular_function:cation binding); GO:1901575(biological_pro…	map00040(Pentose and glucuronate interconversions)	COG3866(S:Function unknown)	PF00544.20(Pectate_lyase_4:Pectate lyase)	extracellular	3	14	44.7	High
A0A161XID8	1.58764	0.01102	up	yes	Uncharacterized protein OS=Daucus carota subsp. sativus OX=79200 GN=DCAR_007716 PE=3 SV=1	K09873	TIP	GO:0000325(cellular_component:plant-type vacuole); GO:0043229(cellular_component:intracellular organelle); GO:0003674(molecular_function:molecular_function); GO:0043227(cellular_component:membrane-bounded organelle); GO:0043226(cellular_component:organelle); GO:0031224(cellular_component:intrinsic component of membrane); GO:0031090(cellular_component:organelle membrane); GO:0005773(cellular_compo…		COG0580(T:Signal transduction mechanisms)	PF00230.21(MIP:Major intrinsic protein)	Golgi apparatus	1	6	26	Medium
A0A164WP40	1.55976	0.0163	up	yes	26S proteasome regulatory subunit RPN11 OS=Daucus carota subsp. sativus OX=79200 GN=DCAR_020582 PE=4 SV=1	K03030	PSMD14, RPN11, POH1	GO:0008234(molecular_function:cysteine-type peptidase activity); GO:0101005(molecular_function:ubiquitinyl hydrolase activity); GO:0061578(molecular_function:Lys63-specific deubiquitinase activity); GO:0044248(biological_process:cellular catabolic process); GO:0006807(biological_process:nitrogen compound metabolic process); GO:0003674(molecular_function:molecular_function); GO:0005488(molecular_f…	map03050(Proteasome)	COG1310(S:Function unknown)	PF01398.22(JAB:JAB1/Mov34/MPN/PAD-1 ubiquitin protease); PF13012.7(MitMem_reg:Maintenance of mitochondrial structure and function); PF14464.7(Prok-JAB:Prokaryotic homologs of the JAB domain)	cytoplasmic	8	31	34.5	High
A0A166DU65	1.56231	1.4e-05	up	yes	Beta-ketoacyl-[acyl-carrier-protein] synthase I OS=Daucus carota subsp. sativus OX=79200 GN=DCAR_006519 PE=3 SV=1	K09458	fabF, OXSM, CEM1	GO:0006633(biological_process:fatty acid biosynthetic process); GO:0006631(biological_process:fatty acid metabolic process); GO:0019752(biological_process:carboxylic acid metabolic process); GO:0044249(biological_process:cellular biosynthetic process); GO:0003674(molecular_function:molecular_function); GO:0044281(biological_process:small molecule metabolic process); GO:0044283(biological_process:…	map00780(Biotin metabolism); map00061(Fatty acid biosynthesis)	COG0304(S:Function unknown)	PF00109.27(ketoacyl-synt:Beta-ketoacyl synthase, N-terminal domain); PF02801.23(Ketoacyl-synt_C:Beta-ketoacyl synthase, C-terminal domain)	chloroplast	7	16	55	High
A0A166E043	1.65822	3.1e-05	up	yes	Glutamine amidotransferase OS=Daucus carota subsp. sativus OX=79200 GN=DCAR_006738 PE=3 SV=1	K01951	guaA, GMPS	GO:0009167(biological_process:purine ribonucleoside monophosphate metabolic process); GO:0009165(biological_process:nucleotide biosynthetic process); GO:0009163(biological_process:nucleoside biosynthetic process); GO:0009161(biological_process:ribonucleoside monophosphate metabolic process); GO:1901362(biological_process:organic cyclic compound biosynthetic process); GO:0042451(biological_process…	map00230(Purine metabolism)	COG0519(F:Nucleotide transport and metabolism)	PF00958.23(GMP_synt_C:GMP synthase C terminal domain); PF00117.29(GATase:Glutamine amidotransferase class-I); PF07722.14(Peptidase_C26:Peptidase C26); PF02540.18(NAD_synthase:NAD synthase)	chloroplast	4	25	59.1	High
A0A161Y294	1.71067	0.000222	up	yes	Peroxiredoxin OS=Daucus carota subsp. sativus OX=79200 GN=DCAR_023383 PE=3 SV=1	K11188	PRDX6	GO:0042592(biological_process:homeostatic process); GO:0043229(cellular_component:intracellular organelle); GO:0003674(molecular_function:molecular_function); GO:0043227(cellular_component:membrane-bounded organelle); GO:0043226(cellular_component:organelle); GO:0016491(molecular_function:oxidoreductase activity); GO:0005739(cellular_component:mitochondrion); GO:0050789(biological_process:regulat…	map00940(Phenylpropanoid biosynthesis)	COG0450(S:Function unknown)	PF00578.22(AhpC-TSA:AhpC/TSA family); PF08534.11(Redoxin:Redoxin); PF10417.10(1-cysPrx_C:C-terminal domain of 1-Cys peroxiredoxin)	chloroplast	18	64	24.2	High
A0A161XSF4	1.57262	0.000252	up	yes	AAA domain-containing protein OS=Daucus carota subsp. sativus OX=79200 GN=DCAR_017849 PE=3 SV=1	K03066	PSMC5, RPT6	GO:0080090(biological_process:regulation of primary metabolic process); GO:0019222(biological_process:regulation of metabolic process); GO:0031595(cellular_component:nuclear proteasome complex); GO:0031597(cellular_component:cytosolic proteasome complex); GO:1901363(molecular_function:heterocyclic compound binding); GO:0010604(biological_process:positive regulation of macromolecule metabolic proc…	map03050(Proteasome)	COG1222(U:Intracellular trafficking, secretion, and vesicular transport)	PF00004.30(AAA:ATPase family associated with various cellular activities (AAA)); PF17862.2(AAA_lid_3:AAA+ lid domain); PF16450.6(Prot_ATP_ID_OB:Proteasomal ATPase OB C-terminal domain); PF07724.15(AAA_2:AAA domain (Cdc48 subfamily)); PF13191.7(AAA_16:AAA ATPase domain); PF07728.15(AAA_5:AAA domain (dynein-related subfamily))	cytoplasmic	18	45	48	High
A0A164SMC7	1.63567	2.8e-05	up	yes	Protein geranylgeranyltransferase type II OS=Daucus carota subsp. sativus OX=79200 GN=DCAR_023465 PE=3 SV=1	K05956	RABGGTB	GO:0008152(biological_process:metabolic process); GO:0006807(biological_process:nitrogen compound metabolic process); GO:0003674(molecular_function:molecular_function); GO:0005488(molecular_function:binding); GO:0008318(molecular_function:protein prenyltransferase activity); GO:0044267(biological_process:cellular protein metabolic process); GO:0044260(biological_process:cellular macromolecule met…		COG5029(J:Translation, ribosomal structure and biogenesis)	PF00432.22(Prenyltrans:Prenyltransferase and squalene oxidase repeat)	cytoplasmic	2	4	58.5	High
A0A166HT82	1.52362	3e-06	up	yes	RRM domain-containing protein OS=Daucus carota subsp. sativus OX=79200 GN=DCAR_003018 PE=4 SV=1			GO:0080090(biological_process:regulation of primary metabolic process); GO:0019222(biological_process:regulation of metabolic process); GO:0031323(biological_process:regulation of cellular metabolic process); GO:0090304(biological_process:nucleic acid metabolic process); GO:0043229(cellular_component:intracellular organelle); GO:0006807(biological_process:nitrogen compound metabolic process); GO:…		COG0724(S:Function unknown)	PF00076.23(RRM_1:RNA recognition motif. (a.k.a. RRM, RBD, or RNP domain))	chloroplast	6	57	14.5	High
A0A166FN67	1.619	3e-05	up	yes	Ubiquitin carboxyl-terminal hydrolase OS=Daucus carota subsp. sativus OX=79200 GN=DCAR_000641 PE=3 SV=1	K05609	UCHL3, YUH1	GO:0008234(molecular_function:cysteine-type peptidase activity); GO:0101005(molecular_function:ubiquitinyl hydrolase activity); GO:0044248(biological_process:cellular catabolic process); GO:0006807(biological_process:nitrogen compound metabolic process); GO:0003674(molecular_function:molecular_function); GO:0043632(biological_process:modification-dependent macromolecule catabolic process); GO:000…		ENOG4111HNA(O:Posttranslational modification, protein turnover, chaperones)	PF01088.22(Peptidase_C12:Ubiquitin carboxyl-terminal hydrolase, family 1)	cytoplasmic	6	27	25.9	High
A0A161ZZD1	1.53762	0.02317	up	yes	TBCC domain-containing protein 1 OS=Daucus carota subsp. sativus OX=79200 GN=DCAR_017027 PE=3 SV=1	K16810	TBCCD1	GO:0032502(biological_process:developmental process); GO:0009653(biological_process:anatomical structure morphogenesis); GO:0008150(biological_process:biological_process); GO:0000902(biological_process:cell morphogenesis)		ENOG410XRXF(S:Function unknown)	PF07986.13(TBCC:Tubulin binding cofactor C)	cytoplasmic	2	4	64.4	High
A0A162A7J7	1.5202	3e-06	up	yes	Adenosine kinase OS=Daucus carota subsp. sativus OX=79200 GN=DCAR_015296 PE=3 SV=1	K00856	E2.7.1.20, ADK	GO:0019206(molecular_function:nucleoside kinase activity); GO:0019205(molecular_function:nucleobase-containing compound kinase activity); GO:0044249(biological_process:cellular biosynthetic process); GO:0043229(cellular_component:intracellular organelle); GO:0006807(biological_process:nitrogen compound metabolic process); GO:0003674(molecular_function:molecular_function); GO:0009163(biological_pr…	map00230(Purine metabolism)	COG0524(S:Function unknown)	PF00294.25(PfkB:pfkB family carbohydrate kinase)	nuclear	7	66	37.1	High
A0A164TTJ6	1.52268	0.004017	up	yes	Uncharacterized protein OS=Daucus carota subsp. sativus OX=79200 GN=DCAR_005593 PE=3 SV=1	K02921	RP-L37Ae, RPL37A	GO:0044238(biological_process:primary metabolic process); GO:0043232(cellular_component:intracellular non-membrane-bounded organelle); GO:0044249(biological_process:cellular biosynthetic process); GO:0034641(biological_process:cellular nitrogen compound metabolic process); GO:0006807(biological_process:nitrogen compound metabolic process); GO:0003674(molecular_function:molecular_function); GO:003…	map03010(Ribosome)	COG1997(J:Translation, ribosomal structure and biogenesis)	PF01780.20(Ribosomal_L37ae:Ribosomal L37ae protein family)	chloroplast	3	38	7.1	High
A0A161XJ73	1.56103	2e-06	up	yes	Uncharacterized protein OS=Daucus carota subsp. sativus OX=79200 GN=DCAR_012550 PE=4 SV=1			GO:0016787(molecular_function:hydrolase activity); GO:0008233(molecular_function:peptidase activity); GO:0140096(molecular_function:catalytic activity, acting on a protein); GO:0003674(molecular_function:molecular_function); GO:0003824(molecular_function:catalytic activity)		ENOG4111GMT(S:Function unknown)	PF10502.10(Peptidase_S26:Signal peptidase, peptidase S26)	cytoplasmic	6	38	23.2	High
A0A164UEI6	1.54482	0.001918	up	yes	Uncharacterized protein OS=Daucus carota subsp. sativus OX=79200 GN=DCAR_025859 PE=3 SV=1	K04043	dnaK, HSPA9	GO:0061077(biological_process:chaperone-mediated protein folding); GO:0006457(biological_process:protein folding); GO:0070887(biological_process:cellular response to chemical stimulus); GO:0046914(molecular_function:transition metal ion binding); GO:0035639(molecular_function:purine ribonucleoside triphosphate binding); GO:0031072(molecular_function:heat shock protein binding); GO:0006458(biologi…	map03018(RNA degradation)	COG0443(O:Posttranslational modification, protein turnover, chaperones)	PF00012.21(HSP70:Hsp70 protein); PF06723.14(MreB_Mbl:MreB/Mbl protein); PF02782.17(FGGY_C:FGGY family of carbohydrate kinases, C-terminal domain)	chloroplast	5	11	73.1	High
A0A175YBV4	1.5272	1e-06	up	yes	Uncharacterized protein OS=Daucus carota subsp. sativus OX=79200 GN=DCAR_031777 PE=3 SV=1	K14496	PYL	GO:0038023(molecular_function:signaling receptor activity); GO:0080090(biological_process:regulation of primary metabolic process); GO:0019222(biological_process:regulation of metabolic process); GO:0010921(biological_process:regulation of phosphatase activity); GO:0019208(molecular_function:phosphatase regulator activity); GO:0031323(biological_process:regulation of cellular metabolic process); …	map04016(MAPK signaling pathway - plant); map04075(Plant hormone signal transduction)	ENOG410YDHK(S:Function unknown)	PF10604.10(Polyketide_cyc2:Polyketide cyclase / dehydrase and lipid transport); PF03364.21(Polyketide_cyc:Polyketide cyclase / dehydrase and lipid transport)	cytoplasmic	4	24	21.8	High
A0A175YIY9	1.78078	0.000204	up	yes	Anamorsin homolog OS=Daucus carota subsp. sativus OX=79200 GN=DCAR_030401 PE=3 SV=1	K22746	CIAPIN1, DRE2	GO:0022607(biological_process:cellular component assembly); GO:0031970(cellular_component:organelle envelope lumen); GO:0031974(cellular_component:membrane-enclosed lumen); GO:0003674(molecular_function:molecular_function); GO:0005488(molecular_function:binding); GO:0008168(molecular_function:methyltransferase activity); GO:0071840(biological_process:cellular component organization or biogenesis)…		COG5636(S:Function unknown)	PF05093.14(CIAPIN1:Cytokine-induced anti-apoptosis inhibitor 1, Fe-S biogenesis)	cytoplasmic	1	6	27	High
A0A164U182	1.57528	0.00215	up	yes	Tubulin alpha chain OS=Daucus carota subsp. sativus OX=79200 GN=DCAR_025371 PE=3 SV=1	K07374	TUBA	GO:0005200(molecular_function:structural constituent of cytoskeleton); GO:0099512(cellular_component:supramolecular fiber); GO:0099513(cellular_component:polymeric cytoskeletal fiber); GO:0035639(molecular_function:purine ribonucleoside triphosphate binding); GO:0003674(molecular_function:molecular_function); GO:0005488(molecular_function:binding); GO:0019001(molecular_function:guanyl nucleotide …	map04145(Phagosome)	COG5023(P:Inorganic ion transport and metabolism)	PF00091.26(Tubulin:Tubulin/FtsZ family, GTPase domain); PF03953.18(Tubulin_C:Tubulin C-terminal domain)	cytoplasmic	4	41	49.8	High
A0A165WN47	1.50098	0.000403	up	yes	Protein kinase domain-containing protein OS=Daucus carota subsp. sativus OX=79200 GN=DCAR_015111 PE=3 SV=1	K08856	STK16	GO:0035639(molecular_function:purine ribonucleoside triphosphate binding); GO:0003674(molecular_function:molecular_function); GO:0005488(molecular_function:binding); GO:0043167(molecular_function:ion binding); GO:1901363(molecular_function:heterocyclic compound binding); GO:1901265(molecular_function:nucleoside phosphate binding); GO:0005737(cellular_component:cytoplasm); GO:0000166(molecular_fun…		ENOG410YN06(T:Signal transduction mechanisms)	PF00069.26(Pkinase:Protein kinase domain); PF07714.18(PK_Tyr_Ser-Thr:Protein tyrosine and serine/threonine kinase)	cytoplasmic	5	19	38.4	High
A0A175YNQ2	1.60491	0.001711	up	yes	BP28CT domain-containing protein OS=Daucus carota subsp. sativus OX=79200 GN=DCAR_027698 PE=3 SV=1	K14550	UTP10, HEATR1		map03008(Ribosome biogenesis in eukaryotes)	ENOG410XNQQ(J:Translation, ribosomal structure and biogenesis)	PF08146.13(BP28CT:BP28CT (NUC211) domain); PF12397.9(U3snoRNP10:U3 small nucleolar RNA-associated protein 10)	cytoplasmic	3	2	242.6	High
A0A175YQL6	1.5491	0	up	yes	Adenosylhomocysteinase OS=Daucus carota subsp. sativus OX=79200 GN=DCAR_026653 PE=3 SV=1	K01251	E3.3.1.1, ahcY	GO:0016787(molecular_function:hydrolase activity); GO:0009987(biological_process:cellular process); GO:0016801(molecular_function:hydrolase activity, acting on ether bonds); GO:0004013(molecular_function:adenosylhomocysteinase activity); GO:0016802(molecular_function:trialkylsulfonium hydrolase activity); GO:0044237(biological_process:cellular metabolic process); GO:0003824(molecular_function:cat…	map00270(Cysteine and methionine metabolism)	COG0499(H:Coenzyme transport and metabolism)	PF05221.18(AdoHcyase:S-adenosyl-L-homocysteine hydrolase); PF00670.22(AdoHcyase_NAD:S-adenosyl-L-homocysteine hydrolase, NAD binding domain); PF02826.20(2-Hacid_dh_C:D-isomer specific 2-hydroxyacid dehydrogenase, NAD binding domain)	cytoplasmic	10	74	53.1	High
A0A165ZPN5	1.52783	0.001068	up	yes	Uncharacterized protein OS=Daucus carota subsp. sativus OX=79200 GN=DCAR_009033 PE=4 SV=1			GO:0005575(cellular_component:cellular_component); GO:0016021(cellular_component:integral component of membrane); GO:0110165(cellular_component:cellular anatomical entity); GO:0031224(cellular_component:intrinsic component of membrane)		COG0457(O:Posttranslational modification, protein turnover, chaperones)		chloroplast	1	1	74.7	High
A0A164X086	1.56398	1.2e-05	up	yes	Uncharacterized protein OS=Daucus carota subsp. sativus OX=79200 GN=DCAR_020114 PE=4 SV=1			GO:0044238(biological_process:primary metabolic process); GO:0005975(biological_process:carbohydrate metabolic process); GO:0071704(biological_process:organic substance metabolic process); GO:0016773(molecular_function:phosphotransferase activity, alcohol group as acceptor); GO:0016772(molecular_function:transferase activity, transferring phosphorus-containing groups); GO:0016301(molecular_functi…		COG1069(G:Carbohydrate transport and metabolism)	PF00370.22(FGGY_N:FGGY family of carbohydrate kinases, N-terminal domain)	cytoplasmic	2	16	15	High
A0A165YUW0	1.53187	0.000347	up	yes	Fructose-bisphosphate aldolase OS=Daucus carota subsp. sativus OX=79200 GN=DCAR_013363 PE=3 SV=1	K01623	ALDO	GO:0009185(biological_process:ribonucleoside diphosphate metabolic process); GO:0016310(biological_process:phosphorylation); GO:0019752(biological_process:carboxylic acid metabolic process); GO:0034641(biological_process:cellular nitrogen compound metabolic process); GO:0006807(biological_process:nitrogen compound metabolic process); GO:0003674(molecular_function:molecular_function); GO:0044281(b…	map00010(Glycolysis / Gluconeogenesis); map00030(Pentose phosphate pathway); map00051(Fructose and mannose metabolism); map00710(Carbon fixation in photosynthetic organisms)	COG3588(G:Carbohydrate transport and metabolism)	PF00274.20(Glycolytic:Fructose-bisphosphate aldolase class-I)	cytoplasmic	13	76	38.5	High
A0A164VUP8	1.50443	3.3e-05	up	yes	Succinate dehydrogenase [ubiquinone] iron-sulfur subunit, mitochondrial OS=Daucus carota subsp. sativus OX=79200 GN=DCAR_021751 PE=3 SV=1	K00235	SDHB, SDH2	GO:0016635(molecular_function:oxidoreductase activity, acting on the CH-CH group of donors, quinone or related compound as acceptor); GO:0006099(biological_process:tricarboxylic acid cycle); GO:0009060(biological_process:aerobic respiration); GO:0003674(molecular_function:molecular_function); GO:0005488(molecular_function:binding); GO:0006091(biological_process:generation of precursor metabolites…	map00020(Citrate cycle (TCA cycle)); map00190(Oxidative phosphorylation)	COG0479(S:Function unknown)	PF13085.7(Fer2_3:2Fe-2S iron-sulfur cluster binding domain); PF13534.7(Fer4_17:4Fe-4S dicluster domain); PF13237.7(Fer4_10:4Fe-4S dicluster domain); PF13183.7(Fer4_8:4Fe-4S dicluster domain)	chloroplast	5	21	31.6	High
A0A164WZK6	1.59232	0.000564	up	yes	Uncharacterized protein OS=Daucus carota subsp. sativus OX=79200 GN=DCAR_020144 PE=3 SV=1	K02937	RP-L7e, RPL7	GO:0015934(cellular_component:large ribosomal subunit); GO:0022625(cellular_component:cytosolic large ribosomal subunit); GO:0090304(biological_process:nucleic acid metabolic process); GO:0034641(biological_process:cellular nitrogen compound metabolic process); GO:0006807(biological_process:nitrogen compound metabolic process); GO:0003674(molecular_function:molecular_function); GO:0005488(molecul…	map03010(Ribosome)	COG1841(J:Translation, ribosomal structure and biogenesis)	PF08079.13(Ribosomal_L30_N:Ribosomal L30 N-terminal domain); PF00327.21(Ribosomal_L30:Ribosomal protein L30p/L7e)	chloroplast	4	54	28.4	High
A0A164VDB9	1.65204	0.001704	up	yes	Uncharacterized protein OS=Daucus carota subsp. sativus OX=79200 GN=DCAR_022460 PE=3 SV=1	K13205	AAR2, C20orf4	GO:0000387(biological_process:spliceosomal snRNP assembly); GO:0022607(biological_process:cellular component assembly); GO:0000244(biological_process:spliceosomal tri-snRNP complex assembly); GO:0043933(biological_process:macromolecular complex subunit organization); GO:0009987(biological_process:cellular process); GO:0071826(biological_process:ribonucleoprotein complex subunit organization); GO:…		ENOG410XSI4(S:Function unknown)	PF05282.12(AAR2:AAR2 protein)	extracellular	1	3	44.7	High
A0A164TTJ1	1.54062	0.006395	up	yes	MI domain-containing protein OS=Daucus carota subsp. sativus OX=79200 GN=DCAR_025037 PE=4 SV=1	K03260	EIF4G	GO:0090079(molecular_function:translation regulator activity, nucleic acid binding); GO:0045182(molecular_function:translation regulator activity); GO:0097159(molecular_function:organic cyclic compound binding); GO:0008135(molecular_function:translation factor activity, RNA binding); GO:0003674(molecular_function:molecular_function); GO:0005488(molecular_function:binding); GO:0003676(molecular_fu…	map03013(RNA transport)	ENOG410XS4P(J:Translation, ribosomal structure and biogenesis)	PF02854.20(MIF4G:MIF4G domain); PF02847.18(MA3:MA3 domain)	cytoplasmic	1	1	193.4	Medium
A0A166GRP4	1.536	0.000356	up	yes	PDZ domain-containing protein OS=Daucus carota subsp. sativus OX=79200 GN=DCAR_001924 PE=3 SV=1			GO:0016787(molecular_function:hydrolase activity); GO:0016021(cellular_component:integral component of membrane); GO:0140096(molecular_function:catalytic activity, acting on a protein); GO:0005575(cellular_component:cellular_component); GO:0003824(molecular_function:catalytic activity); GO:0003674(molecular_function:molecular_function); GO:0031224(cellular_component:intrinsic component of membran…		COG0265(O:Posttranslational modification, protein turnover, chaperones); ENOG41105X0(S:Function unknown)	PF13180.7(PDZ_2:PDZ domain); PF17820.2(PDZ_6:PDZ domain)	mitochondrial	1	2	47.4	Medium
A0A164VVE7	1.52642	0.00072	up	yes	Pescadillo homolog OS=Daucus carota subsp. sativus OX=79200 GN=DCAR_021719 PE=3 SV=1	K14843	PES1, NOP7	GO:0019219(biological_process:regulation of nucleobase-containing compound metabolic process); GO:0000466(biological_process:maturation of 5.8S rRNA from tricistronic rRNA transcript (SSU-rRNA, 5.8S rRNA, LSU-rRNA)); GO:0019222(biological_process:regulation of metabolic process); GO:0030687(cellular_component:preribosome, large subunit precursor); GO:0030684(cellular_component:preribosome); GO:00…		COG5163(J:Translation, ribosomal structure and biogenesis)	PF06732.12(Pescadillo_N:Pescadillo N-terminus); PF16589.6(BRCT_2:BRCT domain, a BRCA1 C-terminus domain)	nuclear	6	11	68.7	High
A0A161Y3T9	1.54876	0.000824	up	yes	Uncharacterized protein OS=Daucus carota subsp. sativus OX=79200 GN=DCAR_012643 PE=3 SV=1	K02872	RP-L13Ae, RPL13A	GO:0015934(cellular_component:large ribosomal subunit); GO:0071704(biological_process:organic substance metabolic process); GO:0010393(biological_process:galacturonan metabolic process); GO:0016052(biological_process:carbohydrate catabolic process); GO:1901564(biological_process:organonitrogen compound metabolic process); GO:0044249(biological_process:cellular biosynthetic process); GO:0034641(bi…	map03010(Ribosome)	COG0102(J:Translation, ribosomal structure and biogenesis)	PF00572.19(Ribosomal_L13:Ribosomal protein L13)	chloroplast	2	39	23.3	High
A0A164UYH6	1.52243	0.006025	up	yes	EF-hand domain-containing protein OS=Daucus carota subsp. sativus OX=79200 GN=DCAR_023090 PE=4 SV=1	K11583	PPP2R3	GO:0043169(molecular_function:cation binding); GO:0043167(molecular_function:ion binding); GO:0003674(molecular_function:molecular_function); GO:0005488(molecular_function:binding); GO:0046872(molecular_function:metal ion binding); GO:0005509(molecular_function:calcium ion binding)	map03015(mRNA surveillance pathway)	ENOG410XRBK(S:Function unknown)	PF13499.7(EF-hand_7:EF-hand domain pair); PF13405.7(EF-hand_6:EF-hand domain); PF00036.33(EF-hand_1:EF hand)	cytoplasmic	9	36	48.7	High
A0A166C8D7	1.6126	8e-05	up	yes	Uncharacterized protein OS=Daucus carota subsp. sativus OX=79200 GN=DCAR_012180 PE=3 SV=1	K02943	RP-LP2, RPLP2	GO:0044249(biological_process:cellular biosynthetic process); GO:0043229(cellular_component:intracellular organelle); GO:0043228(cellular_component:non-membrane-bounded organelle); GO:0003674(molecular_function:molecular_function); GO:0034645(biological_process:cellular macromolecule biosynthetic process); GO:0043226(cellular_component:organelle); GO:1901576(biological_process:organic substance b…	map03010(Ribosome)	COG2058(J:Translation, ribosomal structure and biogenesis)	PF00428.20(Ribosomal_60s:60s Acidic ribosomal protein)	Golgi apparatus	2	49	18.8	High
A0A175YAJ3	1.52953	0.000404	up	yes	60S acidic ribosomal protein P0 OS=Daucus carota subsp. sativus OX=79200 GN=DCAR_032141 PE=3 SV=1	K02941	RP-LP0, RPLP0	GO:0044238(biological_process:primary metabolic process); GO:0015934(cellular_component:large ribosomal subunit); GO:0034645(biological_process:cellular macromolecule biosynthetic process); GO:0022625(cellular_component:cytosolic large ribosomal subunit); GO:0043933(biological_process:macromolecular complex subunit organization); GO:0006807(biological_process:nitrogen compound metabolic process);…	map03010(Ribosome)	COG0244(J:Translation, ribosomal structure and biogenesis)	PF00428.20(Ribosomal_60s:60s Acidic ribosomal protein); PF17777.2(RL10P_insert:Insertion domain in 60S ribosomal protein L10P); PF00466.21(Ribosomal_L10:Ribosomal protein L10)	chloroplast	8	39	33.9	High
A0A162A9H7	1.57332	0.000118	up	yes	Tr-type G domain-containing protein OS=Daucus carota subsp. sativus OX=79200 GN=DCAR_015168 PE=4 SV=1	K03267	ERF3, GSPT	GO:0035639(molecular_function:purine ribonucleoside triphosphate binding); GO:0003674(molecular_function:molecular_function); GO:0005488(molecular_function:binding); GO:0043167(molecular_function:ion binding); GO:1901363(molecular_function:heterocyclic compound binding); GO:0001883(molecular_function:purine nucleoside binding); GO:0001882(molecular_function:nucleoside binding); GO:0043168(molecul…	map03015(mRNA surveillance pathway)	COG5256(J:Translation, ribosomal structure and biogenesis)	PF00009.28(GTP_EFTU:Elongation factor Tu GTP binding domain); PF03143.18(GTP_EFTU_D3:Elongation factor Tu C-terminal domain)	cytoplasmic	10	27	60.4	High
A0A164XRF3	1.52952	2.9e-05	up	yes	MaoC-like domain-containing protein OS=Daucus carota subsp. sativus OX=79200 GN=DCAR_016749 PE=4 SV=1	K19658	ECH2	GO:0034440(biological_process:lipid oxidation); GO:0006631(biological_process:fatty acid metabolic process); GO:0006635(biological_process:fatty acid beta-oxidation); GO:0019752(biological_process:carboxylic acid metabolic process); GO:0044248(biological_process:cellular catabolic process); GO:0042579(cellular_component:microbody); GO:0043229(cellular_component:intracellular organelle); GO:000367…		COG2030(I:Lipid transport and metabolism)	PF01575.20(MaoC_dehydratas:MaoC like domain)	peroxisomal	7	21	40.9	High
A0A164V075	1.51096	0.000413	up	yes	AAA domain-containing protein OS=Daucus carota subsp. sativus OX=79200 GN=DCAR_023011 PE=3 SV=1	K03064	PSMC6, RPT4	GO:0035639(molecular_function:purine ribonucleoside triphosphate binding); GO:0006807(biological_process:nitrogen compound metabolic process); GO:0003674(molecular_function:molecular_function); GO:0005488(molecular_function:binding); GO:0008233(molecular_function:peptidase activity); GO:0043167(molecular_function:ion binding); GO:1901363(molecular_function:heterocyclic compound binding); GO:19012…	map03050(Proteasome)	COG1222(S:Function unknown)	PF00004.30(AAA:ATPase family associated with various cellular activities (AAA)); PF16450.6(Prot_ATP_ID_OB:Proteasomal ATPase OB C-terminal domain); PF17862.2(AAA_lid_3:AAA+ lid domain)	cytoplasmic	15	56	41.7	High
A0A166J9Z0	1.51346	0.002025	up	yes	HABP4_PAI-RBP1 domain-containing protein OS=Daucus carota subsp. sativus OX=79200 GN=DCAR_004601 PE=4 SV=1	K13199	SERBP1	GO:0097159(molecular_function:organic cyclic compound binding); GO:0003674(molecular_function:molecular_function); GO:0005488(molecular_function:binding); GO:0003676(molecular_function:nucleic acid binding); GO:1901363(molecular_function:heterocyclic compound binding); GO:0003723(molecular_function:RNA binding)		ENOG410YBHR(S:Function unknown)	PF04774.16(HABP4_PAI-RBP1:Hyaluronan / mRNA binding family); PF09598.11(Stm1_N:Stm1)	cytoplasmic	3	23	38.9	High
A0A161WTA3	1.64151	0.000567	up	yes	UBC core domain-containing protein OS=Daucus carota subsp. sativus OX=79200 GN=DCAR_010629 PE=3 SV=1	K06689	UBE2D, UBC4, UBC5	GO:0061650(molecular_function:ubiquitin-like protein conjugating enzyme activity); GO:0035639(molecular_function:purine ribonucleoside triphosphate binding); GO:0044248(biological_process:cellular catabolic process); GO:0006807(biological_process:nitrogen compound metabolic process); GO:0003674(molecular_function:molecular_function); GO:0005488(molecular_function:binding); GO:0043632(biological_p…	map04120(Ubiquitin mediated proteolysis); map04141(Protein processing in endoplasmic reticulum)	COG5078(S:Function unknown)	PF00179.27(UQ_con:Ubiquitin-conjugating enzyme)	chloroplast	3	23	22.6	High
A0A164UP70	1.58479	0.000995	up	yes	Pseudouridine synthase OS=Daucus carota subsp. sativus OX=79200 GN=DCAR_026236 PE=3 SV=1			GO:0031118(biological_process:rRNA pseudouridine synthesis); GO:0016798(molecular_function:hydrolase activity, acting on glycosyl bonds); GO:0009451(biological_process:RNA modification); GO:0090304(biological_process:nucleic acid metabolic process); GO:0034641(biological_process:cellular nitrogen compound metabolic process); GO:0006807(biological_process:nitrogen compound metabolic process); GO:0…		COG0564(J:Translation, ribosomal structure and biogenesis)	PF00849.23(PseudoU_synth_2:RNA pseudouridylate synthase)	cytoplasmic	1	3	42.9	High
A0A175YNP9	1.675	0.002075	up	yes	Uncharacterized protein OS=Daucus carota subsp. sativus OX=79200 GN=DCAR_027840 PE=3 SV=1	K01853;K15822	CAS1;CAMS1, LUP3	GO:0031559(molecular_function:oxidosqualene cyclase activity); GO:0043229(cellular_component:intracellular organelle); GO:0043228(cellular_component:non-membrane-bounded organelle); GO:0003674(molecular_function:molecular_function); GO:0016866(molecular_function:intramolecular transferase activity); GO:0043226(cellular_component:organelle); GO:0031224(cellular_component:intrinsic component of mem…	map00909(Sesquiterpenoid and triterpenoid biosynthesis); map00100(Steroid biosynthesis)	COG1657(I:Lipid transport and metabolism)	PF13243.7(SQHop_cyclase_C:Squalene-hopene cyclase C-terminal domain); PF00432.22(Prenyltrans:Prenyltransferase and squalene oxidase repeat); PF13249.7(SQHop_cyclase_N:Squalene-hopene cyclase N-terminal domain)	cytoplasmic	1	1	97.7	High
A0A161WTV5	1.50699	0.000124	up	yes	Uncharacterized protein OS=Daucus carota subsp. sativus OX=79200 GN=DCAR_010899 PE=4 SV=1	K03257	EIF4A	GO:0005488(molecular_function:binding); GO:0016787(molecular_function:hydrolase activity); GO:0140098(molecular_function:catalytic activity, acting on RNA); GO:0090079(molecular_function:translation regulator activity, nucleic acid binding); GO:0016818(molecular_function:hydrolase activity, acting on acid anhydrides, in phosphorus-containing anhydrides); GO:0003824(molecular_function:catalytic ac…	map03013(RNA transport)	ENOG4111P3E(S:Function unknown)		cytoplasmic	1	8	23.4	High
A0A164X640	1.53535	6e-06	up	yes	CCT-theta OS=Daucus carota subsp. sativus OX=79200 GN=DCAR_019879 PE=3 SV=1	K09500	CCT8	GO:0006457(biological_process:protein folding); GO:0035639(molecular_function:purine ribonucleoside triphosphate binding); GO:0003674(molecular_function:molecular_function); GO:0005488(molecular_function:binding); GO:0043167(molecular_function:ion binding); GO:1901363(molecular_function:heterocyclic compound binding); GO:1901265(molecular_function:nucleoside phosphate binding); GO:0005737(cellula…		ENOG410XPXR(O:Posttranslational modification, protein turnover, chaperones)	PF00118.25(Cpn60_TCP1:TCP-1/cpn60 chaperonin family)	chloroplast	22	54	58.4	High
A0A162ALB8	1.5015	0.00018	up	yes	Glycerol-3-phosphate dehydrogenase [NAD(+)] OS=Daucus carota subsp. sativus OX=79200 GN=DCAR_003232 PE=3 SV=1	K00006	GPD1	GO:0046434(biological_process:organophosphate catabolic process); GO:0009331(cellular_component:glycerol-3-phosphate dehydrogenase complex); GO:0019674(biological_process:NAD metabolic process); GO:0051287(molecular_function:NAD binding); GO:0006734(biological_process:NADH metabolic process); GO:1990204(cellular_component:oxidoreductase complex); GO:0003674(molecular_function:molecular_function);…	map00564(Glycerophospholipid metabolism)	COG0240(C:Energy production and conversion)	PF07479.15(NAD_Gly3P_dh_C:NAD-dependent glycerol-3-phosphate dehydrogenase C-terminus); PF01210.24(NAD_Gly3P_dh_N:NAD-dependent glycerol-3-phosphate dehydrogenase N-terminus)	cytoplasmic	7	18	51.2	High
A0A165YHC5	1.53481	0.000821	up	yes	TBCC domain-containing protein 1 OS=Daucus carota subsp. sativus OX=79200 GN=DCAR_013559 PE=3 SV=1	K16810	TBCCD1	GO:0032502(biological_process:developmental process); GO:0009653(biological_process:anatomical structure morphogenesis); GO:0008150(biological_process:biological_process); GO:0000902(biological_process:cell morphogenesis)		ENOG410XRXF(S:Function unknown)	PF07986.13(TBCC:Tubulin binding cofactor C)	cytoplasmic	6	13	62.2	High
A0A164URG4	1.59474	0.001097	up	yes	Uncharacterized protein OS=Daucus carota subsp. sativus OX=79200 GN=DCAR_026329 PE=4 SV=1					ENOG410XV03(S:Function unknown)		cytoplasmic	1	7	16.8	High
A0A166HB17	1.52413	0.008362	up	yes	WD_REPEATS_REGION domain-containing protein OS=Daucus carota subsp. sativus OX=79200 GN=DCAR_002684 PE=4 SV=1	K14553	UTP18	GO:0034388(cellular_component:Pwp2p-containing subcomplex of 90S preribosome); GO:0032040(cellular_component:small-subunit processome); GO:0032991(cellular_component:macromolecular complex); GO:0016021(cellular_component:integral component of membrane); GO:1990904(cellular_component:ribonucleoprotein complex); GO:0030684(cellular_component:preribosome); GO:0005575(cellular_component:cellular_comp…	map03008(Ribosome biogenesis in eukaryotes)	ENOG410YBWP(S:Function unknown)		peroxisomal	1	3	62.7	High
A0A175YJR1	1.51509	0.000295	up	yes	Peptidase A1 domain-containing protein OS=Daucus carota subsp. sativus OX=79200 GN=DCAR_030960 PE=3 SV=1			GO:0004175(molecular_function:endopeptidase activity); GO:1990234(cellular_component:transferase complex); GO:0048580(biological_process:regulation of post-embryonic development); GO:0010029(biological_process:regulation of seed germination); GO:0008270(molecular_function:zinc ion binding); GO:0008233(molecular_function:peptidase activity); GO:0050789(biological_process:regulation of biological p…		ENOG410XNV7(S:Function unknown)	PF14543.7(TAXi_N:Xylanase inhibitor N-terminal); PF00026.24(Asp:Eukaryotic aspartyl protease); PF14541.7(TAXi_C:Xylanase inhibitor C-terminal)	ER	14	38	49.3	High
[truncated: 942 more rows]

## Sheet: Supplementary table 2B
Supplementary table 2B. DAPs between CK and HYD
[truncated: 788 more rows]

## Sheet: Supplementary table 2C
Supplementary table 2C. DAPs between HYD and HEHP
[truncated: 206 more rows]
