# Supplementary material for: Carrot (Daucus carota L.) Seed Germination Was Promoted by Hydro-Electro Hybrid Priming Through Regulating the Accumulation of Proteins Involved in Carbohydrate and Protein Metabolism
Source: Front Plant Sci. 2022 Feb 10;13:824439. doi: 10.3389/fpls.2022.824439 (PMC8868939; doi:10.3389/fpls.2022.824439)
Supplement: Supplementary file 3 [file Table_3.xlsx]

## Sheet: Supplementary table 3A
Supplementary table 3A. KEGG enrichment analysis of upregulated DAPs in HEHP vs CK.
Protein Number	Pathway_ID	KEGG Description	P_value_corrected
40	map03010	Ribosome	0.00244343
13	map03008	Ribosome biogenesis in eukaryotes	0.0282568
12	map00051	Fructose and mannose metabolism	1
11	map00040	Pentose and glucuronate interconversions	1
10	map00970	Aminoacyl-tRNA biosynthesis	1
2	map00909	Sesquiterpenoid and triterpenoid biosynthesis	1
3	map00660	C5-Branched dibasic acid metabolism	1
10	map03050	Proteasome	1
2	map00966	Glucosinolate biosynthesis	1
4	map00100	Steroid biosynthesis	1
4	map00780	Biotin metabolism	1
6	map04075	Plant hormone signal transduction	1
10	map03018	RNA degradation	1
3	map00300	Lysine biosynthesis	1
12	map00270	Cysteine and methionine metabolism	1
20	map04141	Protein processing in endoplasmic reticulum	1
14	map00520	Amino sugar and nucleotide sugar metabolism	1
2	map00600	Sphingolipid metabolism	1
3	map00945	Stilbenoid, diarylheptanoid and gingerol biosynthesis	1
3	map00290	Valine, leucine and isoleucine biosynthesis	1
5	map00900	Terpenoid backbone biosynthesis	1
1	map00904	Diterpenoid biosynthesis	1
1	map00523	Polyketide sugar unit biosynthesis	1
8	map00030	Pentose phosphate pathway	1
8	map03015	mRNA surveillance pathway	1
5	map04120	Ubiquitin mediated proteolysis	1
6	map00053	Ascorbate and aldarate metabolism	1
2	map00261	Monobactam biosynthesis	1
2	map03410	Base excision repair	1
1	map03022	Basal transcription factors	1
3	map00670	One carbon pool by folate	1
4	map00564	Glycerophospholipid metabolism	1
2	map00073	Cutin, suberine and wax biosynthesis	1
1	map00072	Synthesis and degradation of ketone bodies	1
7	map04626	Plant-pathogen interaction	1
5	map04145	Phagosome	1
3	map00450	Selenocompound metabolism	1
2	map03020	RNA polymerase	1
3	map03030	DNA replication	1
3	map00941	Flavonoid biosynthesis	1
3	map03420	Nucleotide excision repair	1
1	map00591	Linoleic acid metabolism	1
1	map00908	Zeatin biosynthesis	1
4	map00061	Fatty acid biosynthesis	1
1	map00902	Monoterpenoid biosynthesis	1
1	map00603	Glycosphingolipid biosynthesis - globo and isoglobo series	1
2	map03430	Mismatch repair	1
2	map03440	Homologous recombination	1
12	map03013	RNA transport	1
3	map04016	MAPK signaling pathway - plant	1
1	map00565	Ether lipid metabolism	1
4	map00592	alpha-Linolenic acid metabolism	1
4	map00071	Fatty acid degradation	1
1	map00430	Taurine and hypotaurine metabolism	1
10	map00500	Starch and sucrose metabolism	1
1	map00590	Arachidonic acid metabolism	1
1	map00531	Glycosaminoglycan degradation	1
3	map00350	Tyrosine metabolism	1
11	map00010	Glycolysis / Gluconeogenesis	1
5	map04146	Peroxisome	1
7	map00230	Purine metabolism	1
4	map00052	Galactose metabolism	1
2	map00460	Cyanoamino acid metabolism	1
1	map01040	Biosynthesis of unsaturated fatty acids	1
10	map00940	Phenylpropanoid biosynthesis	1
1	map00950	Isoquinoline alkaloid biosynthesis	1
4	map00260	Glycine, serine and threonine metabolism	1
1	map00860	Porphyrin and chlorophyll metabolism	1
2	map00400	Phenylalanine, tyrosine and tryptophan biosynthesis	1
5	map00480	Glutathione metabolism	1
1	map00920	Sulfur metabolism	1
1	map00910	Nitrogen metabolism	1
2	map00561	Glycerolipid metabolism	1
1	map03060	Protein export	1
1	map00650	Butanoate metabolism	1
8	map03040	Spliceosome	1
5	map04144	Endocytosis	1
5	map00190	Oxidative phosphorylation	1
3	map00020	Citrate cycle (TCA cycle)	1
4	map00630	Glyoxylate and dicarboxylate metabolism	1
2	map00240	Pyrimidine metabolism	1
4	map00710	Carbon fixation in photosynthetic organisms	1
2	map00280	Valine, leucine and isoleucine degradation	1
1	map00220	Arginine biosynthesis	1
1	map00380	Tryptophan metabolism	1
1	map00330	Arginine and proline metabolism	1
1	map00410	beta-Alanine metabolism	1
4	map00620	Pyruvate metabolism	1
1	map00640	Propanoate metabolism	1
1	map00250	Alanine, aspartate and glutamate metabolism	1

## Sheet: Supplementary table 3B
Supplementary table 3B. KEGG enrichment analysis of upregulated DAPs in HYD vs CK.
Protein Number	Pathway_ID	KEGG Description	P_value_corrected
9	map03050	Proteasome	0.00228241
7	map00051	Fructose and mannose metabolism	0.029642
16	map03010	Ribosome	1
6	map00040	Pentose and glucuronate interconversions	1
6	map03015	mRNA surveillance pathway	1
2	map03410	Base excision repair	1
6	map03018	RNA degradation	1
1	map00904	Diterpenoid biosynthesis	1
1	map00523	Polyketide sugar unit biosynthesis	1
2	map00073	Cutin, suberine and wax biosynthesis	1
3	map03030	DNA replication	1
3	map03420	Nucleotide excision repair	1
4	map03008	Ribosome biogenesis in eukaryotes	1
2	map00100	Steroid biosynthesis	1
2	map00780	Biotin metabolism	1
2	map03440	Homologous recombination	1
2	map03430	Mismatch repair	1
4	map00970	Aminoacyl-tRNA biosynthesis	1
1	map00908	Zeatin biosynthesis	1
1	map00591	Linoleic acid metabolism	1
2	map00910	Nitrogen metabolism	1
1	map00902	Monoterpenoid biosynthesis	1
4	map04626	Plant-pathogen interaction	1
1	map00565	Ether lipid metabolism	1
1	map00430	Taurine and hypotaurine metabolism	1
5	map00270	Cysteine and methionine metabolism	1
2	map00900	Terpenoid backbone biosynthesis	1
1	map00300	Lysine biosynthesis	1
2	map04075	Plant hormone signal transduction	1
2	map04120	Ubiquitin mediated proteolysis	1
1	map00945	Stilbenoid, diarylheptanoid and gingerol biosynthesis	1
2	map00400	Phenylalanine, tyrosine and tryptophan biosynthesis	1
8	map04141	Protein processing in endoplasmic reticulum	1
6	map03040	Spliceosome	1
3	map00030	Pentose phosphate pathway	1
2	map00061	Fatty acid biosynthesis	1
2	map00350	Tyrosine metabolism	1
6	map00940	Phenylpropanoid biosynthesis	1
1	map00950	Isoquinoline alkaloid biosynthesis	1
5	map00520	Amino sugar and nucleotide sugar metabolism	1
2	map00071	Fatty acid degradation	1
2	map00053	Ascorbate and aldarate metabolism	1
1	map00920	Sulfur metabolism	1
1	map00450	Selenocompound metabolism	1
5	map03013	RNA transport	1
1	map00941	Flavonoid biosynthesis	1
1	map00564	Glycerophospholipid metabolism	1
2	map00052	Galactose metabolism	1
1	map04016	MAPK signaling pathway - plant	1
3	map04144	Endocytosis	1
4	map00500	Starch and sucrose metabolism	1
2	map04146	Peroxisome	1
1	map00380	Tryptophan metabolism	1
1	map00330	Arginine and proline metabolism	1
1	map04145	Phagosome	1
4	map00010	Glycolysis / Gluconeogenesis	1
1	map00410	beta-Alanine metabolism	1
2	map00630	Glyoxylate and dicarboxylate metabolism	1
1	map00240	Pyrimidine metabolism	1
1	map00260	Glycine, serine and threonine metabolism	1
1	map00480	Glutathione metabolism	1
1	map00710	Carbon fixation in photosynthetic organisms	1
1	map00230	Purine metabolism	1
1	map00620	Pyruvate metabolism	1

## Sheet: Supplementary table 3C
Supplementary table 3C. KEGG enrichment analysis of upregulated DAPs in HEHP vs HYD.
Protein Number	Pathway_ID	KEGG Description	P_value_corrected
4	map00100	Steroid biosynthesis	0.0152576
6	map00040	Pentose and glucuronate interconversions	0.0534928
4	map00941	Flavonoid biosynthesis	0.0959577
3	map00945	Stilbenoid, diarylheptanoid and gingerol biosynthesis	0.185666
7	map00520	Amino sugar and nucleotide sugar metabolism	0.271848
4	map00053	Ascorbate and aldarate metabolism	0.595297
2	map00600	Sphingolipid metabolism	0.626295
5	map00270	Cysteine and methionine metabolism	1
6	map00940	Phenylpropanoid biosynthesis	1
1	map00523	Polyketide sugar unit biosynthesis	1
5	map00500	Starch and sucrose metabolism	1
1	map00909	Sesquiterpenoid and triterpenoid biosynthesis	1
3	map00052	Galactose metabolism	1
2	map00564	Glycerophospholipid metabolism	1
2	map04016	MAPK signaling pathway - plant	1
2	map00460	Cyanoamino acid metabolism	1
2	map00900	Terpenoid backbone biosynthesis	1
1	map00591	Linoleic acid metabolism	1
1	map00660	C5-Branched dibasic acid metabolism	1
1	map00603	Glycosphingolipid biosynthesis - globo and isoglobo series	1
1	map00565	Ether lipid metabolism	1
2	map00350	Tyrosine metabolism	1
1	map00430	Taurine and hypotaurine metabolism	1
2	map04145	Phagosome	1
1	map00590	Arachidonic acid metabolism	1
1	map00073	Cutin, suberine and wax biosynthesis	1
4	map00010	Glycolysis / Gluconeogenesis	1
1	map00290	Valine, leucine and isoleucine biosynthesis	1
1	map00950	Isoquinoline alkaloid biosynthesis	1
2	map00051	Fructose and mannose metabolism	1
2	map00030	Pentose phosphate pathway	1
2	map04146	Peroxisome	1
1	map00450	Selenocompound metabolism	1
1	map00650	Butanoate metabolism	1
1	map00770	Pantothenate and CoA biosynthesis	1
2	map00630	Glyoxylate and dicarboxylate metabolism	1
2	map00480	Glutathione metabolism	1
1	map04075	Plant hormone signal transduction	1
2	map04144	Endocytosis	1
1	map00380	Tryptophan metabolism	1
1	map00561	Glycerolipid metabolism	1
2	map00620	Pyruvate metabolism	1
1	map03008	Ribosome biogenesis in eukaryotes	1
1	map00592	alpha-Linolenic acid metabolism	1
1	map00071	Fatty acid degradation	1
3	map04141	Protein processing in endoplasmic reticulum	1
1	map00240	Pyrimidine metabolism	1
1	map04626	Plant-pathogen interaction	1
1	map00020	Citrate cycle (TCA cycle)	1
1	map00260	Glycine, serine and threonine metabolism	1
1	map03018	RNA degradation	1
1	map00230	Purine metabolism	1
1	map00190	Oxidative phosphorylation	1
1	map03040	Spliceosome	1

## Sheet: Supplementary table 3D
Supplementary table 3D. KEGG enrichment analysis of downregulated DAPs in HEHP vs CK.
Protein Number	Pathway_ID	KEGG Description	P_value_corrected
36	map00195	Photosynthesis	8.45187e-19
38	map00940	Phenylpropanoid biosynthesis	2.54061e-05
8	map00196	Photosynthesis - antenna proteins	0.00197199
23	map00710	Carbon fixation in photosynthetic organisms	0.0190591
7	map00531	Glycosaminoglycan degradation	0.0643104
11	map00460	Cyanoamino acid metabolism	0.12451
11	map00360	Phenylalanine metabolism	0.183801
9	map00130	Ubiquinone and other terpenoid-quinone biosynthesis	0.43281
8	map00910	Nitrogen metabolism	0.80765
18	map00630	Glyoxylate and dicarboxylate metabolism	1
11	map00350	Tyrosine metabolism	1
14	map00052	Galactose metabolism	1
7	map00960	Tropane, piperidine and pyridine alkaloid biosynthesis	1
5	map00590	Arachidonic acid metabolism	1
5	map04712	Circadian rhythm - plant	1
8	map00941	Flavonoid biosynthesis	1
14	map00040	Pentose and glucuronate interconversions	1
17	map00480	Glutathione metabolism	1
11	map00592	alpha-Linolenic acid metabolism	1
4	map00565	Ether lipid metabolism	1
18	map00190	Oxidative phosphorylation	1
10	map04145	Phagosome	1
12	map00250	Alanine, aspartate and glutamate metabolism	1
21	map00500	Starch and sucrose metabolism	1
3	map00591	Linoleic acid metabolism	1
9	map00330	Arginine and proline metabolism	1
3	map00600	Sphingolipid metabolism	1
3	map00603	Glycosphingolipid biosynthesis - globo and isoglobo series	1
5	map00950	Isoquinoline alkaloid biosynthesis	1
4	map00740	Riboflavin metabolism	1
8	map00561	Glycerolipid metabolism	1
1	map00905	Brassinosteroid biosynthesis	1
3	map00430	Taurine and hypotaurine metabolism	1
2	map00604	Glycosphingolipid biosynthesis - ganglio series	1
7	map00380	Tryptophan metabolism	1
6	map04016	MAPK signaling pathway - plant	1
8	map00410	beta-Alanine metabolism	1
8	map00053	Ascorbate and aldarate metabolism	1
11	map04146	Peroxisome	1
5	map00650	Butanoate metabolism	1
1	map00906	Carotenoid biosynthesis	1
24	map04141	Protein processing in endoplasmic reticulum	1
10	map00260	Glycine, serine and threonine metabolism	1
3	map04130	SNARE interactions in vesicular transport	1
2	map04136	Autophagy - other	1
2	map00902	Monoterpenoid biosynthesis	1
5	map00564	Glycerophospholipid metabolism	1
9	map00030	Pentose phosphate pathway	1
3	map00511	Other glycan degradation	1
3	map00513	Various types of N-glycan biosynthesis	1
3	map01040	Biosynthesis of unsaturated fatty acids	1
3	map00760	Nicotinate and nicotinamide metabolism	1
15	map00520	Amino sugar and nucleotide sugar metabolism	1
1	map00062	Fatty acid elongation	1
1	map00072	Synthesis and degradation of ketone bodies	1
5	map00220	Arginine biosynthesis	1
4	map00770	Pantothenate and CoA biosynthesis	1
3	map00860	Porphyrin and chlorophyll metabolism	1
8	map00051	Fructose and mannose metabolism	1
1	map02010	ABC transporters	1
1	map04933	AGE-RAGE signaling pathway in diabetic complications	1
2	map00510	N-Glycan biosynthesis	1
6	map00240	Pyrimidine metabolism	1
2	map00945	Stilbenoid, diarylheptanoid and gingerol biosynthesis	1
2	map03020	RNA polymerase	1
1	map00903	Limonene and pinene degradation	1
1	map00908	Zeatin biosynthesis	1
3	map00450	Selenocompound metabolism	1
4	map04075	Plant hormone signal transduction	1
6	map00280	Valine, leucine and isoleucine degradation	1
2	map00790	Folate biosynthesis	1
10	map04144	Endocytosis	1
4	map00400	Phenylalanine, tyrosine and tryptophan biosynthesis	1
2	map03440	Homologous recombination	1
10	map00270	Cysteine and methionine metabolism	1
5	map00640	Propanoate metabolism	1
2	map00920	Sulfur metabolism	1
3	map00900	Terpenoid backbone biosynthesis	1
1	map00750	Vitamin B6 metabolism	1
1	map00073	Cutin, suberine and wax biosynthesis	1
3	map04120	Ubiquitin mediated proteolysis	1
2	map03030	DNA replication	1
2	map00562	Inositol phosphate metabolism	1
1	map00730	Thiamine metabolism	1
9	map00620	Pyruvate metabolism	1
1	map00340	Histidine metabolism	1
1	map03430	Mismatch repair	1
1	map00670	One carbon pool by folate	1
3	map00071	Fatty acid degradation	1
4	map04626	Plant-pathogen interaction	1
1	map03060	Protein export	1
1	map04070	Phosphatidylinositol signaling system	1
1	map03420	Nucleotide excision repair	1
1	map00310	Lysine degradation	1
6	map00230	Purine metabolism	1
9	map03040	Spliceosome	1
2	map03008	Ribosome biogenesis in eukaryotes	1
9	map00010	Glycolysis / Gluconeogenesis	1
1	map03015	mRNA surveillance pathway	1
1	map00020	Citrate cycle (TCA cycle)	1
2	map03013	RNA transport	1
4	map03010	Ribosome	1

## Sheet: Supplementary table 3E
Supplementary table 3E. KEGG enrichment analysis of downregulated DAPs in HYD vs CK.
Protein Number	Pathway_ID	KEGG Description	P_value_corrected
23	map00195	Photosynthesis	3.25698e-11
20	map00710	Carbon fixation in photosynthetic organisms	4.91748e-05
15	map00630	Glyoxylate and dicarboxylate metabolism	0.0278652
5	map00590	Arachidonic acid metabolism	0.0901391
13	map00480	Glutathione metabolism	0.279521
7	map00460	Cyanoamino acid metabolism	0.4809
6	map00130	Ubiquinone and other terpenoid-quinone biosynthesis	0.786797
8	map00592	alpha-Linolenic acid metabolism	1
16	map00940	Phenylpropanoid biosynthesis	1
4	map01040	Biosynthesis of unsaturated fatty acids	1
9	map00260	Glycine, serine and threonine metabolism	1
3	map00430	Taurine and hypotaurine metabolism	1
8	map00250	Alanine, aspartate and glutamate metabolism	1
5	map00941	Flavonoid biosynthesis	1
9	map04146	Peroxisome	1
11	map00190	Oxidative phosphorylation	1
4	map00960	Tropane, piperidine and pyridine alkaloid biosynthesis	1
6	map00561	Glycerolipid metabolism	1
8	map00030	Pentose phosphate pathway	1
6	map04145	Phagosome	1
1	map00905	Brassinosteroid biosynthesis	1
2	map00591	Linoleic acid metabolism	1
7	map00052	Galactose metabolism	1
2	map00902	Monoterpenoid biosynthesis	1
5	map00380	Tryptophan metabolism	1
7	map00051	Fructose and mannose metabolism	1
2	map00565	Ether lipid metabolism	1
3	map00950	Isoquinoline alkaloid biosynthesis	1
4	map00360	Phenylalanine metabolism	1
5	map00410	beta-Alanine metabolism	1
2	map04712	Circadian rhythm - plant	1
3	map00910	Nitrogen metabolism	1
3	map00650	Butanoate metabolism	1
2	map04130	SNARE interactions in vesicular transport	1
2	map00510	N-Glycan biosynthesis	1
5	map00640	Propanoate metabolism	1
4	map00350	Tyrosine metabolism	1
2	map00945	Stilbenoid, diarylheptanoid and gingerol biosynthesis	1
8	map00270	Cysteine and methionine metabolism	1
3	map00564	Glycerophospholipid metabolism	1
2	map00790	Folate biosynthesis	1
2	map00513	Various types of N-glycan biosynthesis	1
13	map04141	Protein processing in endoplasmic reticulum	1
3	map04016	MAPK signaling pathway - plant	1
4	map00071	Fatty acid degradation	1
4	map00053	Ascorbate and aldarate metabolism	1
9	map00500	Starch and sucrose metabolism	1
3	map00900	Terpenoid backbone biosynthesis	1
1	map00908	Zeatin biosynthesis	1
1	map00903	Limonene and pinene degradation	1
3	map04075	Plant hormone signal transduction	1
2	map00860	Porphyrin and chlorophyll metabolism	1
2	map00920	Sulfur metabolism	1
4	map00280	Valine, leucine and isoleucine degradation	1
3	map00330	Arginine and proline metabolism	1
1	map00750	Vitamin B6 metabolism	1
1	map00196	Photosynthesis - antenna proteins	1
1	map00531	Glycosaminoglycan degradation	1
7	map00520	Amino sugar and nucleotide sugar metabolism	1
1	map03020	RNA polymerase	1
1	map00511	Other glycan degradation	1
8	map00010	Glycolysis / Gluconeogenesis	1
2	map00220	Arginine biosynthesis	1
2	map04120	Ubiquitin mediated proteolysis	1
1	map00340	Histidine metabolism	1
1	map00670	One carbon pool by folate	1
1	map03440	Homologous recombination	1
3	map00040	Pentose and glucuronate interconversions	1
1	map03060	Protein export	1
1	map00450	Selenocompound metabolism	1
2	map03008	Ribosome biogenesis in eukaryotes	1
5	map00620	Pyruvate metabolism	1
1	map00562	Inositol phosphate metabolism	1
2	map00240	Pyrimidine metabolism	1
1	map00310	Lysine degradation	1
1	map00770	Pantothenate and CoA biosynthesis	1
1	map00400	Phenylalanine, tyrosine and tryptophan biosynthesis	1
3	map04144	Endocytosis	1
1	map04626	Plant-pathogen interaction	1
1	map03015	mRNA surveillance pathway	1
2	map00230	Purine metabolism	1
3	map03040	Spliceosome	1
2	map03013	RNA transport	1
2	map03010	Ribosome	1

## Sheet: Supplementary table 3F
Supplementary table 3F. KEGG enrichment analysis of downregulated DAPs in HEHP vs HYD.
Protein Number	Pathway_ID	KEGG Description	P_value_corrected
7	map00195	Photosynthesis	4.51635e-05
4	map00196	Photosynthesis - antenna proteins	0.000145713
6	map00500	Starch and sucrose metabolism	0.0290167
3	map00040	Pentose and glucuronate interconversions	0.618333
2	map00460	Cyanoamino acid metabolism	1
2	map00052	Galactose metabolism	1
1	map00740	Riboflavin metabolism	1
3	map00940	Phenylpropanoid biosynthesis	1
1	map03440	Homologous recombination	1
1	map00950	Isoquinoline alkaloid biosynthesis	1
1	map00860	Porphyrin and chlorophyll metabolism	1
2	map00190	Oxidative phosphorylation	1
1	map00360	Phenylalanine metabolism	1
1	map00380	Tryptophan metabolism	1
1	map00350	Tyrosine metabolism	1
1	map00330	Arginine and proline metabolism	1
1	map04145	Phagosome	1
1	map03008	Ribosome biogenesis in eukaryotes	1
1	map00480	Glutathione metabolism	1
1	map00520	Amino sugar and nucleotide sugar metabolism	1
1	map04141	Protein processing in endoplasmic reticulum	1
