# Supplementary material for: Carrot (Daucus carota L.) Seed Germination Was Promoted by Hydro-Electro Hybrid Priming Through Regulating the Accumulation of Proteins Involved in Carbohydrate and Protein Metabolism
Source: Front Plant Sci. 2022 Feb 10;13:824439. doi: 10.3389/fpls.2022.824439 (PMC8868939; doi:10.3389/fpls.2022.824439)
Supplement: Supplementary file 4 [file Table_4.xlsx]

## Sheet: Supplementary table 4A
Supplementary table 4A. DAPs annotated as “carbohydrate metabolism” in HEHP vs CK.
Accession	Description	FC(HEHP/CK)
A0A166FXR4	NAD(P)-bd_dom domain-containing protein OS=Daucus carota subsp. sativus OX=79200 GN=DCAR_000854 PE=4 SV=1	8.12862
A0A166F773	Uncharacterized protein OS=Daucus carota subsp. sativus OX=79200 GN=DCAR_008257 PE=3 SV=1	7.69489
A0A164VGB4	L-gulonolactone oxidase OS=Daucus carota subsp. sativus OX=79200 GN=DCAR_022331 PE=3 SV=1	7.31525
A0A161X2S7	Uncharacterized protein OS=Daucus carota subsp. sativus OX=79200 GN=DCAR_023827 PE=3 SV=1	5.50285
A0A166A2G3	Pectinesterase OS=Daucus carota subsp. sativus OX=79200 GN=DCAR_009418 PE=3 SV=1	5.4501
A0A162AAW0	Mannan endo-1,4-beta-mannosidase OS=Daucus carota subsp. sativus OX=79200 GN=DCAR_014066 PE=3 SV=1	4.82552
A0A164XQJ4	1,4-alpha-glucan branching enzyme OS=Daucus carota subsp. sativus OX=79200 GN=DCAR_016718 PE=3 SV=1	4.1218
A0A166I510	UTP--glucose-1-phosphate uridylyltransferase OS=Daucus carota subsp. sativus OX=79200 GN=DCAR_003411 PE=3 SV=1	3.58395
A0A166G7Q5	Mannan endo-1,4-beta-mannosidase OS=Daucus carota subsp. sativus OX=79200 GN=DCAR_001169 PE=3 SV=1	3.38707
A0A162AGM9	Uncharacterized protein OS=Daucus carota subsp. sativus OX=79200 GN=DCAR_009385 PE=3 SV=1	3.31017
A0A165XVH1	Mannan endo-1,4-beta-mannosidase OS=Daucus carota subsp. sativus OX=79200 GN=DCAR_014065 PE=3 SV=1	2.9346
A0A166ETS4	UDP-glucose 4-epimerase OS=Daucus carota subsp. sativus OX=79200 GN=DCAR_007808 PE=3 SV=1	2.907
A0A175YLF4	Pectinesterase OS=Daucus carota subsp. sativus OX=79200 GN=DCAR_028163 PE=3 SV=1	2.79178
A0A166FRS9	ATP-dependent 6-phosphofructokinase OS=Daucus carota subsp. sativus OX=79200 GN=PFK PE=3 SV=1	2.70666
A0A161ZP21	Pectinesterase OS=Daucus carota subsp. sativus OX=79200 GN=DCAR_025175 PE=3 SV=1	2.62854
A0A161WZN4	Endoglucanase OS=Daucus carota subsp. sativus OX=79200 GN=DCAR_005042 PE=3 SV=1	2.48354
A0A164ZFG4	Uncharacterized protein OS=Daucus carota subsp. sativus OX=79200 GN=DCAR_019096 PE=4 SV=1	2.441
A0A164YE52	Pyrophosphate--fructose 6-phosphate 1-phosphotransferase subunit alpha OS=Daucus carota subsp. sativus OX=79200 GN=PFP-ALPHA PE=3 SV=1	2.43487
A0A166E0R0	RmlD_sub_bind domain-containing protein OS=Daucus carota subsp. sativus OX=79200 GN=DCAR_006768 PE=4 SV=1	2.41697
A0A166EAB1	Pectate lyase OS=Daucus carota subsp. sativus OX=79200 GN=DCAR_007134 PE=3 SV=1	2.35894
A0A175YIG0	Pyrophosphate--fructose 6-phosphate 1-phosphotransferase subunit beta OS=Daucus carota subsp. sativus OX=79200 GN=PFP-BETA PE=3 SV=1	2.33572
A0A164VUG6	Uncharacterized protein OS=Daucus carota subsp. sativus OX=79200 GN=DCAR_021764 PE=3 SV=1	2.31172
A0A166B347	UDP-glucose 6-dehydrogenase OS=Daucus carota subsp. sativus OX=79200 GN=DCAR_011048 PE=3 SV=1	2.24042
A0A175YLM7	Sucrose synthase OS=Daucus carota subsp. sativus OX=79200 GN=DCAR_028527 PE=3 SV=1	2.20207
A0A165XZ49	Pyrophosphate--fructose 6-phosphate 1-phosphotransferase subunit alpha OS=Daucus carota subsp. sativus OX=79200 GN=PFP-ALPHA PE=3 SV=1	2.18549
A0A165Z711	Isocitrate lyase OS=Daucus carota subsp. sativus OX=79200 GN=DCAR_012950 PE=3 SV=1	2.17399
A0A164UV56	Alpha-galactosidase OS=Daucus carota subsp. sativus OX=79200 GN=DCAR_023233 PE=3 SV=1	2.16604
A0A165Y7I8	Uncharacterized protein OS=Daucus carota subsp. sativus OX=79200 GN=DCAR_013782 PE=4 SV=1	2.0989
A0A164U276	UDP-glucose 6-dehydrogenase OS=Daucus carota subsp. sativus OX=79200 GN=DCAR_025416 PE=3 SV=1	2.08873
A0A162AIC7	Mannan endo-1,4-beta-mannosidase OS=Daucus carota subsp. sativus OX=79200 GN=DCAR_010105 PE=3 SV=1	1.99576
A0A166DFE9	PEROXIDASE_4 domain-containing protein OS=Daucus carota subsp. sativus OX=79200 GN=DCAR_006029 PE=3 SV=1	1.97093
A0A161Y4M2	Beta-amylase OS=Daucus carota subsp. sativus OX=79200 GN=DCAR_024303 PE=3 SV=1	1.92286
A0A161ZRJ3	Endoglucanase OS=Daucus carota subsp. sativus OX=79200 GN=DCAR_022313 PE=3 SV=1	1.88842
A0A175YNP6	3-isopropylmalate dehydratase OS=Daucus carota subsp. sativus OX=79200 GN=DCAR_027353 PE=4 SV=1	1.88665
A0A161Y651	3-hydroxy-3-methylglutaryl coenzyme A synthase OS=Daucus carota subsp. sativus OX=79200 GN=DCAR_005674 PE=3 SV=1	1.85951
A0A162AZ12	ADH_N domain-containing protein OS=Daucus carota subsp. sativus OX=79200 GN=DCAR_000552 PE=4 SV=1	1.84205
A0A164THB2	Glucose-6-phosphate 1-dehydrogenase OS=Daucus carota subsp. sativus OX=79200 GN=DCAR_024658 PE=3 SV=1	1.78929
A0A161YFV4	Fructose-bisphosphate aldolase OS=Daucus carota subsp. sativus OX=79200 GN=DCAR_020776 PE=3 SV=1	1.74708
A0A166A623	Catalase OS=Daucus carota subsp. sativus OX=79200 GN=DCAR_009536 PE=3 SV=1	1.7393
A0A166FRM4	Malic enzyme OS=Daucus carota subsp. sativus OX=79200 GN=DCAR_000763 PE=3 SV=1	1.72941
A0A164WJI0	Phosphopyruvate hydratase OS=Daucus carota subsp. sativus OX=79200 GN=DCAR_020782 PE=3 SV=1	1.7127
A0A166IGR1	Uncharacterized protein OS=Daucus carota subsp. sativus OX=79200 GN=DCAR_003771 PE=4 SV=1	1.71158
A0A162A743	Epimerase domain-containing protein OS=Daucus carota subsp. sativus OX=79200 GN=DCAR_015486 PE=4 SV=1	1.70276
A0A164Y7Q7	GDP-mannose 4,6-dehydratase OS=Daucus carota subsp. sativus OX=79200 GN=DCAR_017348 PE=3 SV=1	1.69598
A0A162A364	Acetyl-CoA carboxytransferase OS=Daucus carota subsp. sativus OX=79200 GN=DCAR_018734 PE=3 SV=1	1.66301
A0A166HFD7	UDP-glucuronate decarboxylase OS=Daucus carota subsp. sativus OX=79200 GN=DCAR_002833 PE=3 SV=1	1.66277
A0A166FDV8	Aconitase_C domain-containing protein OS=Daucus carota subsp. sativus OX=79200 GN=DCAR_008502 PE=4 SV=1	1.6622
A0A165ZT00	1,4-alpha-glucan branching enzyme OS=Daucus carota subsp. sativus OX=79200 GN=DCAR_009140 PE=3 SV=1	1.65979
A0A162AVS0	Alpha-1,4 glucan phosphorylase OS=Daucus carota subsp. sativus OX=79200 GN=DCAR_007400 PE=3 SV=1	1.65945
A0A175YJ76	Pectate lyase OS=Daucus carota subsp. sativus OX=79200 GN=DCAR_030780 PE=3 SV=1	1.65936
A0A164XH24	Malate synthase OS=Daucus carota subsp. sativus OX=79200 GN=DCAR_016413 PE=3 SV=1	1.65254
A0A175YGJ3	Fructose-bisphosphate aldolase OS=Daucus carota subsp. sativus OX=79200 GN=DCAR_030182 PE=3 SV=1	1.64735
A0A161Y5N4	Serine hydroxymethyltransferase OS=Daucus carota subsp. sativus OX=79200 GN=DCAR_005484 PE=3 SV=1	1.63055
A0A165YG04	Uncharacterized protein OS=Daucus carota subsp. sativus OX=79200 GN=DCAR_013594 PE=3 SV=1	1.61466
A0A164T7G8	3-isopropylmalate dehydratase OS=Daucus carota subsp. sativus OX=79200 GN=DCAR_024295 PE=4 SV=1	1.5998
A0A164UNB6	Pectate lyase OS=Daucus carota subsp. sativus OX=79200 GN=DCAR_026200 PE=3 SV=1	1.59395
A0A164UIS5	UDP-glucose 6-dehydrogenase OS=Daucus carota subsp. sativus OX=79200 GN=DCAR_026011 PE=3 SV=1	1.58919
A0A161XIS1	Uncharacterized protein OS=Daucus carota subsp. sativus OX=79200 GN=DCAR_007886 PE=4 SV=1	1.58782
A0A164TL65	Sucrose synthase OS=Daucus carota subsp. sativus OX=79200 GN=DCAR_024777 PE=3 SV=1	1.55054
A0A165YUW0	Fructose-bisphosphate aldolase OS=Daucus carota subsp. sativus OX=79200 GN=DCAR_013363 PE=3 SV=1	1.53136
A0A161XEK6	Succinate dehydrogenase [ubiquinone] flavoprotein subunit, mitochondrial OS=Daucus carota subsp. sativus OX=79200 GN=DCAR_021442 PE=3 SV=1	1.51951
A0A164VUP8	Succinate dehydrogenase [ubiquinone] iron-sulfur subunit, mitochondrial OS=Daucus carota subsp. sativus OX=79200 GN=DCAR_021751 PE=3 SV=1	1.50443
A0A164Z8C4	Epimerase domain-containing protein OS=Daucus carota subsp. sativus OX=79200 GN=DCAR_018750 PE=4 SV=1	1.50137
A0A161Y1Z7	Pyruvate, phosphate dikinase OS=Daucus carota subsp. sativus OX=79200 GN=DCAR_023283 PE=3 SV=1	0.66936
A0A161ZVK3	FAD-binding PCMH-type domain-containing protein OS=Daucus carota subsp. sativus OX=79200 GN=DCAR_020543 PE=4 SV=1	0.665687
A0A175YFL7	Uncharacterized protein OS=Daucus carota subsp. sativus OX=79200 GN=DCAR_030033 PE=3 SV=1	0.665345
A0A162A498	Pectinesterase OS=Daucus carota subsp. sativus OX=79200 GN=DCAR_018322 PE=3 SV=1	0.661614
A0A164ZF83	D-fructose-1,6-bisphosphate 1-phosphohydrolase OS=Daucus carota subsp. sativus OX=79200 GN=DCAR_019086 PE=3 SV=1	0.660689
A0A162B7P6	Uncharacterized protein OS=Daucus carota subsp. sativus OX=79200 GN=DCAR_003699 PE=3 SV=1	0.660502
A0A175YA89	Uncharacterized protein OS=Daucus carota subsp. sativus OX=79200 GN=DCAR_000200 PE=4 SV=1	0.648227
A0A162A9D6	Beta-hexosaminidase OS=Daucus carota subsp. sativus OX=79200 GN=DCAR_015228 PE=3 SV=1	0.647293
A0A166EIW6	Pectate lyase OS=Daucus carota subsp. sativus OX=79200 GN=DCAR_007463 PE=3 SV=1	0.643646
A0A164WJS9	Pyr_redox_2 domain-containing protein OS=Daucus carota subsp. sativus OX=79200 GN=DCAR_020770 PE=4 SV=1	0.642361
A0A165WT34	Acylphosphatase OS=Daucus carota subsp. sativus OX=79200 GN=DCAR_014995 PE=3 SV=1	0.639385
A0A164YM24	Xylose isomerase OS=Daucus carota subsp. sativus OX=79200 GN=DCAR_017956 PE=3 SV=1	0.63888
A0A164UCN6	Uncharacterized protein OS=Daucus carota subsp. sativus OX=79200 GN=DCAR_025786 PE=4 SV=1	0.63785
A0A166ABS1	Uncharacterized protein OS=Daucus carota subsp. sativus OX=79200 GN=DCAR_009762 PE=3 SV=1	0.637767
A0A164WM27	Uncharacterized protein OS=Daucus carota subsp. sativus OX=79200 GN=DCAR_020669 PE=3 SV=1	0.637277
A0A161ZWX3	Glucose-1-phosphate adenylyltransferase OS=Daucus carota subsp. sativus OX=79200 GN=DCAR_021075 PE=3 SV=1	0.636989
A0A166J5N6	Lactoylglutathione lyase OS=Daucus carota subsp. sativus OX=79200 GN=DCAR_004477 PE=3 SV=1	0.634299
A0A165WQZ7	Pyr_redox_2 domain-containing protein OS=Daucus carota subsp. sativus OX=79200 GN=DCAR_015054 PE=4 SV=1	0.63394
A0A164XLJ8	Ribulose-phosphate 3-epimerase OS=Daucus carota subsp. sativus OX=79200 GN=DCAR_016573 PE=3 SV=1	0.630732
A0A166ISC8	Uncharacterized protein OS=Daucus carota subsp. sativus OX=79200 GN=DCAR_004093 PE=3 SV=1	0.629291
A0A161XYR3	Glyco_hydro_18 domain-containing protein OS=Daucus carota subsp. sativus OX=79200 GN=DCAR_010641 PE=3 SV=1	0.627959
A0A175YKR5	SAC domain-containing protein OS=Daucus carota subsp. sativus OX=79200 GN=DCAR_028860 PE=4 SV=1	0.625972
A0A164XVP9	Hydroxymethylglutaryl-CoA lyase OS=Daucus carota subsp. sativus OX=79200 GN=DCAR_016886 PE=3 SV=1	0.625771
A0A162AGQ9	Pectinesterase OS=Daucus carota subsp. sativus OX=79200 GN=DCAR_009415 PE=3 SV=1	0.624111
A0A175YKX6	Glyoxalase I OS=Daucus carota subsp. sativus OX=79200 GN=DCAR_028678 PE=3 SV=1	0.621793
A0A164XB73	Malic enzyme OS=Daucus carota subsp. sativus OX=79200 GN=DCAR_016189 PE=3 SV=1	0.620823
A0A164WPH3	Uncharacterized protein OS=Daucus carota subsp. sativus OX=79200 GN=DCAR_020564 PE=3 SV=1	0.615279
A0A164XAA3	Beta-galactosidase OS=Daucus carota subsp. sativus OX=79200 GN=DCAR_016153 PE=3 SV=1	0.615081
A0A165YRP9	Uncharacterized protein OS=Daucus carota subsp. sativus OX=79200 GN=DCAR_013474 PE=3 SV=1	0.610622
A0A162AMD2	Uncharacterized protein OS=Daucus carota subsp. sativus OX=79200 GN=DCAR_011979 PE=4 SV=1	0.609589
A0A166FE09	Acyl-coenzyme A oxidase OS=Daucus carota subsp. sativus OX=79200 GN=DCAR_008508 PE=3 SV=1	0.605779
A0A166IIF9	Uncharacterized protein OS=Daucus carota subsp. sativus OX=79200 GN=DCAR_003816 PE=3 SV=1	0.605488
A0A166I517	Glutamate decarboxylase OS=Daucus carota subsp. sativus OX=79200 GN=DCAR_003413 PE=3 SV=1	0.601093
A0A166BVV5	Ribose-5-phosphate isomerase OS=Daucus carota subsp. sativus OX=79200 GN=DCAR_011702 PE=3 SV=1	0.595672
A0A166B9V4	Gp_dh_N domain-containing protein OS=Daucus carota subsp. sativus OX=79200 GN=DCAR_011294 PE=3 SV=1	0.593682
A0A161Y6W9	PfkB domain-containing protein OS=Daucus carota subsp. sativus OX=79200 GN=DCAR_023945 PE=3 SV=1	0.592979
A0A165WHC8	Uncharacterized protein OS=Daucus carota subsp. sativus OX=79200 GN=DCAR_015207 PE=4 SV=1	0.592197
A0A161WPL5	Pectinesterase OS=Daucus carota subsp. sativus OX=79200 GN=DCAR_023371 PE=4 SV=1	0.590142
A0A162ADY5	PEROXIDASE_4 domain-containing protein OS=Daucus carota subsp. sativus OX=79200 GN=DCAR_012886 PE=3 SV=1	0.590058
A0A165XBR9	Uncharacterized protein OS=Daucus carota subsp. sativus OX=79200 GN=DCAR_014623 PE=3 SV=1	0.58946
A0A166FFA4	Transketolase OS=Daucus carota subsp. sativus OX=79200 GN=DCAR_008552 PE=3 SV=1	0.589298
A0A161Y8J7	Phosphoenolpyruvate carboxykinase (ATP) OS=Daucus carota subsp. sativus OX=79200 GN=DCAR_025844 PE=3 SV=1	0.5851
A0A164ZU05	(S)-2-hydroxy-acid oxidase OS=Daucus carota subsp. sativus OX=79200 GN=DCAR_019640 PE=3 SV=1	0.583362
A0A175YP87	UDP-glucuronate decarboxylase OS=Daucus carota subsp. sativus OX=79200 GN=DCAR_027650 PE=3 SV=1	0.583333
A0A164ZJA5	Glucose-6-phosphate dehydrogenase (NADP(+)) OS=Daucus carota subsp. sativus OX=79200 GN=DCAR_019248 PE=3 SV=1	0.582213
A0A175YGV9	Alanine--glyoxylate transaminase OS=Daucus carota subsp. sativus OX=79200 GN=DCAR_029980 PE=3 SV=1	0.580716
A0A161YK43	Uncharacterized protein OS=Daucus carota subsp. sativus OX=79200 GN=DCAR_016984 PE=3 SV=1	0.580034
A0A175YB29	Uncharacterized protein OS=Daucus carota subsp. sativus OX=79200 GN=DCAR_031874 PE=3 SV=1	0.578595
A0A165X093	Glyco_18 domain-containing protein OS=Daucus carota subsp. sativus OX=79200 GN=DCAR_014821 PE=4 SV=1	0.577093
A0A164X8M0	Pectinesterase OS=Daucus carota subsp. sativus OX=79200 GN=DCAR_016089 PE=3 SV=1	0.571284
A0A175YJC5	Phosphoglycolate phosphatase OS=Daucus carota subsp. sativus OX=79200 GN=DCAR_030830 PE=3 SV=1	0.56541
A0A165XBQ4	Uncharacterized protein OS=Daucus carota subsp. sativus OX=79200 GN=DCAR_014624 PE=3 SV=1	0.563283
A0A166J8Q2	Uncharacterized protein OS=Daucus carota subsp. sativus OX=79200 GN=DCAR_004565 PE=3 SV=1	0.557075
A0A166A0I8	4-coumarate--CoA ligase OS=Daucus carota subsp. sativus OX=79200 GN=DCAR_009369 PE=4 SV=1	0.552389
A0A164W6E4	Phosphoenolpyruvate carboxylase OS=Daucus carota subsp. sativus OX=79200 GN=DCAR_021291 PE=3 SV=1	0.546627
A0A164YS61	PKS_ER domain-containing protein OS=Daucus carota subsp. sativus OX=79200 GN=DCAR_018149 PE=3 SV=1	0.545
A0A161ZY01	Glutamine amidotransferase type-2 domain-containing protein OS=Daucus carota subsp. sativus OX=79200 GN=DCAR_020565 PE=4 SV=1	0.538569
A0A161ZYP1	4-coumarate--CoA ligase OS=Daucus carota subsp. sativus OX=79200 GN=DCAR_020245 PE=4 SV=1	0.535948
A0A166C372	Uncharacterized protein OS=Daucus carota subsp. sativus OX=79200 GN=DCAR_011980 PE=4 SV=1	0.534251
A0A166DWJ1	Glyco_hydro_18 domain-containing protein OS=Daucus carota subsp. sativus OX=79200 GN=DCAR_006613 PE=3 SV=1	0.533878
A0A169WB01	Glyco_hydro_18 domain-containing protein OS=Daucus carota subsp. sativus OX=79200 GN=DCAR_010642 PE=3 SV=1	0.532148
A0A175YGH2	Alpha-galactosidase OS=Daucus carota subsp. sativus OX=79200 GN=DCAR_030343 PE=3 SV=1	0.529007
A0A166FJ16	Uncharacterized protein OS=Daucus carota subsp. sativus OX=79200 GN=DCAR_000504 PE=4 SV=1	0.528197
A0A166AT73	Alpha-galactosidase OS=Daucus carota subsp. sativus OX=79200 GN=DCAR_010520 PE=3 SV=1	0.522897
A0A166FB62	UDP-glucose 4-epimerase OS=Daucus carota subsp. sativus OX=79200 GN=DCAR_008415 PE=3 SV=1	0.520291
A0A175YP00	Glutamine synthetase OS=Daucus carota subsp. sativus OX=79200 GN=DCAR_027142 PE=3 SV=1	0.516894
A0A165A0L6	Hexosyltransferase OS=Daucus carota subsp. sativus OX=79200 GN=DCAR_015917 PE=3 SV=1	0.509967
A0A166C176	Pectinesterase OS=Daucus carota subsp. sativus OX=79200 GN=DCAR_011906 PE=3 SV=1	0.508287
A0A161YG45	Uncharacterized protein OS=Daucus carota subsp. sativus OX=79200 GN=DCAR_020666 PE=3 SV=1	0.508191
A0A161Y8M1	Serine hydroxymethyltransferase OS=Daucus carota subsp. sativus OX=79200 GN=DCAR_025864 PE=3 SV=1	0.501534
A0A162AB90	1,4-alpha-glucan branching enzyme OS=Daucus carota subsp. sativus OX=79200 GN=DCAR_013916 PE=3 SV=1	0.499266
A0A161WWZ2	Uncharacterized protein OS=Daucus carota subsp. sativus OX=79200 GN=DCAR_011981 PE=4 SV=1	0.49905
A0A165Y9X0	Phosphoglycerate kinase OS=Daucus carota subsp. sativus OX=79200 GN=DCAR_013724 PE=3 SV=1	0.497835
A0A164Y387	Uncharacterized protein OS=Daucus carota subsp. sativus OX=79200 GN=DCAR_017159 PE=3 SV=1	0.496684
A0A164WFH3	Uncharacterized protein OS=Daucus carota subsp. sativus OX=79200 GN=DCAR_020920 PE=3 SV=1	0.496281
A0A175YPH6	Uncharacterized protein OS=Daucus carota subsp. sativus OX=79200 GN=DCAR_027537 PE=4 SV=1	0.494616
A0A165YJ38	Non-reducing end alpha-L-arabinofuranosidase OS=Daucus carota subsp. sativus OX=79200 GN=DCAR_013510 PE=3 SV=1	0.486162
A0A161YFL3	Uncharacterized protein OS=Daucus carota subsp. sativus OX=79200 GN=DCAR_020886 PE=3 SV=1	0.483471
A0A175YQ78	L-ascorbate oxidase OS=Daucus carota subsp. sativus OX=79200 GN=DCAR_026694 PE=3 SV=1	0.477194
A0A175YHP4	Glucose-1-phosphate adenylyltransferase OS=Daucus carota subsp. sativus OX=79200 GN=DCAR_030612 PE=3 SV=1	0.474619
A0A161XDX0	Uncharacterized protein OS=Daucus carota subsp. sativus OX=79200 GN=DCAR_021732 PE=4 SV=1	0.474521
A0A161XK35	Beta-fructofuranosidase OS=Daucus carota subsp. sativus OX=79200 GN=DCAR_008466 PE=3 SV=1	0.471359
A0A164WRQ2	Uncharacterized protein OS=Daucus carota subsp. sativus OX=79200 GN=DCAR_020480 PE=3 SV=1	0.467264
A0A175YD33	Ribulose bisphosphate carboxylase large chain OS=Daucus carota subsp. sativus OX=79200 GN=rbcL PE=3 SV=1	0.463538
A0A164TUM2	Pectinesterase OS=Daucus carota subsp. sativus OX=79200 GN=DCAR_025095 PE=3 SV=1	0.461781
A0A166ARF3	D-fructose-1,6-bisphosphate 1-phosphohydrolase OS=Daucus carota subsp. sativus OX=79200 GN=DCAR_010436 PE=3 SV=1	0.45473
A0A166AF02	Glyco_transf_20 domain-containing protein OS=Daucus carota subsp. sativus OX=79200 GN=DCAR_009902 PE=3 SV=1	0.446944
A0A166G8P9	E1_dh domain-containing protein OS=Daucus carota subsp. sativus OX=79200 GN=DCAR_001207 PE=4 SV=1	0.43226
A0A166DQS9	Malate dehydrogenase [NADP], chloroplastic OS=Daucus carota subsp. sativus OX=79200 GN=DCAR_006393 PE=3 SV=1	0.423272
A0A175YMK9	Aldehyde dehydrogenase OS=Daucus carota subsp. sativus OX=79200 GN=DCAR_028207 PE=3 SV=1	0.41985
A0A175YK10	Aminotran_1_2 domain-containing protein OS=Daucus carota subsp. sativus OX=79200 GN=DCAR_031149 PE=4 SV=1	0.41555
A0A166GT20	Transket_pyr domain-containing protein OS=Daucus carota subsp. sativus OX=79200 GN=DCAR_001966 PE=4 SV=1	0.413347
A0A164UVC9	Uncharacterized protein OS=Daucus carota subsp. sativus OX=79200 GN=DCAR_023229 PE=3 SV=1	0.413243
A0A166IZB4	Uncharacterized protein OS=Daucus carota subsp. sativus OX=79200 GN=DCAR_004308 PE=3 SV=1	0.392111
A0A164ZMM6	Aldedh domain-containing protein OS=Daucus carota subsp. sativus OX=79200 GN=DCAR_019381 PE=3 SV=1	0.383591
A0A161ZSX3	Uncharacterized protein OS=Daucus carota subsp. sativus OX=79200 GN=DCAR_022947 PE=3 SV=1	0.373129
A0A166F7Y7	Glycine cleavage system H protein OS=Daucus carota subsp. sativus OX=79200 GN=DCAR_008288 PE=3 SV=1	0.362853
A0A175YF73	Uncharacterized protein OS=Daucus carota subsp. sativus OX=79200 GN=DCAR_029734 PE=3 SV=1	0.355853
A0A166GWQ9	Alanine--glyoxylate transaminase OS=Daucus carota subsp. sativus OX=79200 GN=DCAR_002094 PE=3 SV=1	0.35554
A0A164YQZ4	Beta-fructofuranosidase OS=Daucus carota subsp. sativus OX=79200 GN=DCAR_018105 PE=3 SV=1	0.315099
A0A164V2F1	Aldo_ket_red domain-containing protein OS=Daucus carota subsp. sativus OX=79200 GN=DCAR_022919 PE=4 SV=1	0.303605
A0A165Z332	Uncharacterized protein OS=Daucus carota subsp. sativus OX=79200 GN=DCAR_013084 PE=3 SV=1	0.299876
A0A166IDX8	Fructose-bisphosphate aldolase OS=Daucus carota subsp. sativus OX=79200 GN=DCAR_003683 PE=3 SV=1	0.284128
A0A162ARE8	Glycine cleavage system H protein OS=Daucus carota subsp. sativus OX=79200 GN=DCAR_005610 PE=3 SV=1	0.265549
A0A162B7M6	Uncharacterized protein OS=Daucus carota subsp. sativus OX=79200 GN=DCAR_003679 PE=3 SV=1	0.264567

## Sheet: Supplementary table 4B
Supplementary table 4B. DAPs annotated as “carbohydrate metabolism” in HYD vs CK.
Accession	Description	FC(HYD/CK)
A0A161ZRJ3	Endoglucanase OS=Daucus carota subsp. sativus OX=79200 GN=DCAR_022313 PE=3 SV=1	5.13013
A0A166F773	Uncharacterized protein OS=Daucus carota subsp. sativus OX=79200 GN=DCAR_008257 PE=3 SV=1	4.5478
A0A166FXR4	NAD(P)-bd_dom domain-containing protein OS=Daucus carota subsp. sativus OX=79200 GN=DCAR_000854 PE=4 SV=1	3.51667
A0A162AAW0	Mannan endo-1,4-beta-mannosidase OS=Daucus carota subsp. sativus OX=79200 GN=DCAR_014066 PE=3 SV=1	3.3792
A0A164VGB4	L-gulonolactone oxidase OS=Daucus carota subsp. sativus OX=79200 GN=DCAR_022331 PE=3 SV=1	3.19649
A0A161X2S7	Uncharacterized protein OS=Daucus carota subsp. sativus OX=79200 GN=DCAR_023827 PE=3 SV=1	2.8862
A0A166G7Q5	Mannan endo-1,4-beta-mannosidase OS=Daucus carota subsp. sativus OX=79200 GN=DCAR_001169 PE=3 SV=1	2.77608
A0A165XVH1	Mannan endo-1,4-beta-mannosidase OS=Daucus carota subsp. sativus OX=79200 GN=DCAR_014065 PE=3 SV=1	2.42875
A0A166A2G3	Pectinesterase OS=Daucus carota subsp. sativus OX=79200 GN=DCAR_009418 PE=3 SV=1	2.34394
A0A161WZN4	Endoglucanase OS=Daucus carota subsp. sativus OX=79200 GN=DCAR_005042 PE=3 SV=1	2.08328
A0A166I510	UTP--glucose-1-phosphate uridylyltransferase OS=Daucus carota subsp. sativus OX=79200 GN=DCAR_003411 PE=3 SV=1	1.89856
A0A166ETS4	UDP-glucose 4-epimerase OS=Daucus carota subsp. sativus OX=79200 GN=DCAR_007808 PE=3 SV=1	1.89402
A0A162AIC7	Mannan endo-1,4-beta-mannosidase OS=Daucus carota subsp. sativus OX=79200 GN=DCAR_010105 PE=3 SV=1	1.80431
A0A166FRS9	ATP-dependent 6-phosphofructokinase OS=Daucus carota subsp. sativus OX=79200 GN=PFK PE=3 SV=1	1.7757
A0A166EAB1	Pectate lyase OS=Daucus carota subsp. sativus OX=79200 GN=DCAR_007134 PE=3 SV=1	1.73219
A0A166A623	Catalase OS=Daucus carota subsp. sativus OX=79200 GN=DCAR_009536 PE=3 SV=1	1.69474
A0A164YE52	Pyrophosphate--fructose 6-phosphate 1-phosphotransferase subunit alpha OS=Daucus carota subsp. sativus OX=79200 GN=PFP-ALPHA PE=3 SV=1	1.665
A0A162AZ12	ADH_N domain-containing protein OS=Daucus carota subsp. sativus OX=79200 GN=DCAR_000552 PE=4 SV=1	1.63113
A0A164UNB6	Pectate lyase OS=Daucus carota subsp. sativus OX=79200 GN=DCAR_026200 PE=3 SV=1	1.62723
A0A166FRM4	Malic enzyme OS=Daucus carota subsp. sativus OX=79200 GN=DCAR_000763 PE=3 SV=1	1.61176
A0A166E0R0	RmlD_sub_bind domain-containing protein OS=Daucus carota subsp. sativus OX=79200 GN=DCAR_006768 PE=4 SV=1	1.60563
A0A175YLF4	Pectinesterase OS=Daucus carota subsp. sativus OX=79200 GN=DCAR_028163 PE=3 SV=1	1.5859
A0A165Z711	Isocitrate lyase OS=Daucus carota subsp. sativus OX=79200 GN=DCAR_012950 PE=3 SV=1	1.57418
A0A165ZT00	1,4-alpha-glucan branching enzyme OS=Daucus carota subsp. sativus OX=79200 GN=DCAR_009140 PE=3 SV=1	1.52847
A0A175YIG0	Pyrophosphate--fructose 6-phosphate 1-phosphotransferase subunit beta OS=Daucus carota subsp. sativus OX=79200 GN=PFP-BETA PE=3 SV=1	1.52775
A0A162A743	Epimerase domain-containing protein OS=Daucus carota subsp. sativus OX=79200 GN=DCAR_015486 PE=4 SV=1	1.5195
A0A165ABA1	Uncharacterized protein OS=Daucus carota subsp. sativus OX=79200 GN=DCAR_015400 PE=3 SV=1	0.66744
A0A175YQ78	L-ascorbate oxidase OS=Daucus carota subsp. sativus OX=79200 GN=DCAR_026694 PE=3 SV=1	0.661368
A0A164UVC9	Uncharacterized protein OS=Daucus carota subsp. sativus OX=79200 GN=DCAR_023229 PE=3 SV=1	0.658744
A0A161YG45	Uncharacterized protein OS=Daucus carota subsp. sativus OX=79200 GN=DCAR_020666 PE=3 SV=1	0.652492
A0A166C176	Pectinesterase OS=Daucus carota subsp. sativus OX=79200 GN=DCAR_011906 PE=3 SV=1	0.646734
A0A162B7P6	Uncharacterized protein OS=Daucus carota subsp. sativus OX=79200 GN=DCAR_003699 PE=3 SV=1	0.639218
A0A166FE09	Acyl-coenzyme A oxidase OS=Daucus carota subsp. sativus OX=79200 GN=DCAR_008508 PE=3 SV=1	0.63899
A0A164ZF83	D-fructose-1,6-bisphosphate 1-phosphohydrolase OS=Daucus carota subsp. sativus OX=79200 GN=DCAR_019086 PE=3 SV=1	0.638186
A0A164WJS9	Pyr_redox_2 domain-containing protein OS=Daucus carota subsp. sativus OX=79200 GN=DCAR_020770 PE=4 SV=1	0.634028
A0A175YJC5	Phosphoglycolate phosphatase OS=Daucus carota subsp. sativus OX=79200 GN=DCAR_030830 PE=3 SV=1	0.632882
A0A166I517	Glutamate decarboxylase OS=Daucus carota subsp. sativus OX=79200 GN=DCAR_003413 PE=3 SV=1	0.630665
A0A175YGV9	Alanine--glyoxylate transaminase OS=Daucus carota subsp. sativus OX=79200 GN=DCAR_029980 PE=3 SV=1	0.630387
A0A161ZY01	Glutamine amidotransferase type-2 domain-containing protein OS=Daucus carota subsp. sativus OX=79200 GN=DCAR_020565 PE=4 SV=1	0.625175
A0A166IZB4	Uncharacterized protein OS=Daucus carota subsp. sativus OX=79200 GN=DCAR_004308 PE=3 SV=1	0.624461
A0A162AB90	1,4-alpha-glucan branching enzyme OS=Daucus carota subsp. sativus OX=79200 GN=DCAR_013916 PE=3 SV=1	0.623258
A0A161ZQ59	Fructose-bisphosphate aldolase OS=Daucus carota subsp. sativus OX=79200 GN=DCAR_022915 PE=3 SV=1	0.622904
A0A161XFG0	Phosphoenolpyruvate carboxylase OS=Daucus carota subsp. sativus OX=79200 GN=DCAR_021022 PE=3 SV=1	0.618955
A0A166FFA4	Transketolase OS=Daucus carota subsp. sativus OX=79200 GN=DCAR_008552 PE=3 SV=1	0.612134
A0A164W6E4	Phosphoenolpyruvate carboxylase OS=Daucus carota subsp. sativus OX=79200 GN=DCAR_021291 PE=3 SV=1	0.612103
A0A161Y6W9	PfkB domain-containing protein OS=Daucus carota subsp. sativus OX=79200 GN=DCAR_023945 PE=3 SV=1	0.612096
A0A175YP00	Glutamine synthetase OS=Daucus carota subsp. sativus OX=79200 GN=DCAR_027142 PE=3 SV=1	0.603882
A0A175YPH6	Uncharacterized protein OS=Daucus carota subsp. sativus OX=79200 GN=DCAR_027537 PE=4 SV=1	0.601945
A0A164ZU05	(S)-2-hydroxy-acid oxidase OS=Daucus carota subsp. sativus OX=79200 GN=DCAR_019640 PE=3 SV=1	0.599519
A0A166FJ16	Uncharacterized protein OS=Daucus carota subsp. sativus OX=79200 GN=DCAR_000504 PE=4 SV=1	0.592912
A0A166J8Q2	Uncharacterized protein OS=Daucus carota subsp. sativus OX=79200 GN=DCAR_004565 PE=3 SV=1	0.591097
A0A161YFL3	Uncharacterized protein OS=Daucus carota subsp. sativus OX=79200 GN=DCAR_020886 PE=3 SV=1	0.590565
A0A161Y8M1	Serine hydroxymethyltransferase OS=Daucus carota subsp. sativus OX=79200 GN=DCAR_025864 PE=3 SV=1	0.588476
A0A175YHP4	Glucose-1-phosphate adenylyltransferase OS=Daucus carota subsp. sativus OX=79200 GN=DCAR_030612 PE=3 SV=1	0.588107
A0A164ZJA5	Glucose-6-phosphate dehydrogenase (NADP(+)) OS=Daucus carota subsp. sativus OX=79200 GN=DCAR_019248 PE=3 SV=1	0.584971
A0A161Y1Z7	Pyruvate, phosphate dikinase OS=Daucus carota subsp. sativus OX=79200 GN=DCAR_023283 PE=3 SV=1	0.573401
A0A175YP87	UDP-glucuronate decarboxylase OS=Daucus carota subsp. sativus OX=79200 GN=DCAR_027650 PE=3 SV=1	0.569273
A0A161XK35	Beta-fructofuranosidase OS=Daucus carota subsp. sativus OX=79200 GN=DCAR_008466 PE=3 SV=1	0.564833
A0A161ZYP1	4-coumarate--CoA ligase OS=Daucus carota subsp. sativus OX=79200 GN=DCAR_020245 PE=4 SV=1	0.560012
A0A166ABS1	Uncharacterized protein OS=Daucus carota subsp. sativus OX=79200 GN=DCAR_009762 PE=3 SV=1	0.558621
A0A165A0L6	Hexosyltransferase OS=Daucus carota subsp. sativus OX=79200 GN=DCAR_015917 PE=3 SV=1	0.558536
A0A166DQS9	Malate dehydrogenase [NADP], chloroplastic OS=Daucus carota subsp. sativus OX=79200 GN=DCAR_006393 PE=3 SV=1	0.552108
A0A166ARF3	D-fructose-1,6-bisphosphate 1-phosphohydrolase OS=Daucus carota subsp. sativus OX=79200 GN=DCAR_010436 PE=3 SV=1	0.549324
A0A166FB62	UDP-glucose 4-epimerase OS=Daucus carota subsp. sativus OX=79200 GN=DCAR_008415 PE=3 SV=1	0.544572
A0A164YQZ4	Beta-fructofuranosidase OS=Daucus carota subsp. sativus OX=79200 GN=DCAR_018105 PE=3 SV=1	0.53007
A0A161XDX0	Uncharacterized protein OS=Daucus carota subsp. sativus OX=79200 GN=DCAR_021732 PE=4 SV=1	0.525154
A0A175YMK9	Aldehyde dehydrogenase OS=Daucus carota subsp. sativus OX=79200 GN=DCAR_028207 PE=3 SV=1	0.516712
A0A164WRQ2	Uncharacterized protein OS=Daucus carota subsp. sativus OX=79200 GN=DCAR_020480 PE=3 SV=1	0.515162
A0A165Y9X0	Phosphoglycerate kinase OS=Daucus carota subsp. sativus OX=79200 GN=DCAR_013724 PE=3 SV=1	0.498918
A0A166G8P9	E1_dh domain-containing protein OS=Daucus carota subsp. sativus OX=79200 GN=DCAR_001207 PE=4 SV=1	0.488263
A0A165Z332	Uncharacterized protein OS=Daucus carota subsp. sativus OX=79200 GN=DCAR_013084 PE=3 SV=1	0.477004
A0A175YK10	Aminotran_1_2 domain-containing protein OS=Daucus carota subsp. sativus OX=79200 GN=DCAR_031149 PE=4 SV=1	0.446716
A0A175YF73	Uncharacterized protein OS=Daucus carota subsp. sativus OX=79200 GN=DCAR_029734 PE=3 SV=1	0.439138
A0A164V2F1	Aldo_ket_red domain-containing protein OS=Daucus carota subsp. sativus OX=79200 GN=DCAR_022919 PE=4 SV=1	0.433903
A0A164ZMM6	Aldedh domain-containing protein OS=Daucus carota subsp. sativus OX=79200 GN=DCAR_019381 PE=3 SV=1	0.417056
A0A166GT20	Transket_pyr domain-containing protein OS=Daucus carota subsp. sativus OX=79200 GN=DCAR_001966 PE=4 SV=1	0.416411
A0A166F7Y7	Glycine cleavage system H protein OS=Daucus carota subsp. sativus OX=79200 GN=DCAR_008288 PE=3 SV=1	0.41144
A0A166GWQ9	Alanine--glyoxylate transaminase OS=Daucus carota subsp. sativus OX=79200 GN=DCAR_002094 PE=3 SV=1	0.409334
A0A161ZSX3	Uncharacterized protein OS=Daucus carota subsp. sativus OX=79200 GN=DCAR_022947 PE=3 SV=1	0.399401
A0A166IDX8	Fructose-bisphosphate aldolase OS=Daucus carota subsp. sativus OX=79200 GN=DCAR_003683 PE=3 SV=1	0.394124
A0A162B7M6	Uncharacterized protein OS=Daucus carota subsp. sativus OX=79200 GN=DCAR_003679 PE=3 SV=1	0.38622
A0A175YD33	Ribulose bisphosphate carboxylase large chain OS=Daucus carota subsp. sativus OX=79200 GN=rbcL PE=3 SV=1	0.369279
A0A162ARE8	Glycine cleavage system H protein OS=Daucus carota subsp. sativus OX=79200 GN=DCAR_005610 PE=3 SV=1	0.353249

## Sheet: Supplementary table 4C
Supplementary table 4C. DAPs annotated as “carbohydrate metabolism” in HEHP vs HYD.
Accession	Description	FC(HEHP/HYD)
A0A164XQJ4	1,4-alpha-glucan branching enzyme OS=Daucus carota subsp. sativus OX=79200 GN=DCAR_016718 PE=3 SV=1	4.11917
A0A162AGM9	Uncharacterized protein OS=Daucus carota subsp. sativus OX=79200 GN=DCAR_009385 PE=3 SV=1	2.54185
A0A166A2G3	Pectinesterase OS=Daucus carota subsp. sativus OX=79200 GN=DCAR_009418 PE=3 SV=1	2.32519
A0A166FXR4	NAD(P)-bd_dom domain-containing protein OS=Daucus carota subsp. sativus OX=79200 GN=DCAR_000854 PE=4 SV=1	2.31146
A0A164VGB4	L-gulonolactone oxidase OS=Daucus carota subsp. sativus OX=79200 GN=DCAR_022331 PE=3 SV=1	2.28852
A0A161Y4M2	Beta-amylase OS=Daucus carota subsp. sativus OX=79200 GN=DCAR_024303 PE=3 SV=1	2.00073
A0A161ZP21	Pectinesterase OS=Daucus carota subsp. sativus OX=79200 GN=DCAR_025175 PE=3 SV=1	1.99382
A0A161X2S7	Uncharacterized protein OS=Daucus carota subsp. sativus OX=79200 GN=DCAR_023827 PE=3 SV=1	1.90661
A0A166I510	UTP--glucose-1-phosphate uridylyltransferase OS=Daucus carota subsp. sativus OX=79200 GN=DCAR_003411 PE=3 SV=1	1.88772
A0A164UV56	Alpha-galactosidase OS=Daucus carota subsp. sativus OX=79200 GN=DCAR_023233 PE=3 SV=1	1.76444
A0A175YLF4	Pectinesterase OS=Daucus carota subsp. sativus OX=79200 GN=DCAR_028163 PE=3 SV=1	1.76038
A0A164VUG6	Uncharacterized protein OS=Daucus carota subsp. sativus OX=79200 GN=DCAR_021764 PE=3 SV=1	1.75841
A0A164ZFG4	Uncharacterized protein OS=Daucus carota subsp. sativus OX=79200 GN=DCAR_019096 PE=4 SV=1	1.75416
A0A166F773	Uncharacterized protein OS=Daucus carota subsp. sativus OX=79200 GN=DCAR_008257 PE=3 SV=1	1.692
A0A166B347	UDP-glucose 6-dehydrogenase OS=Daucus carota subsp. sativus OX=79200 GN=DCAR_011048 PE=3 SV=1	1.65148
A0A165Y7I8	Uncharacterized protein OS=Daucus carota subsp. sativus OX=79200 GN=DCAR_013782 PE=4 SV=1	1.63424
A0A165XZV1	Catalase OS=Daucus carota subsp. sativus OX=79200 GN=DCAR_013924 PE=3 SV=1	1.59336
A0A166DFE9	PEROXIDASE_4 domain-containing protein OS=Daucus carota subsp. sativus OX=79200 GN=DCAR_006029 PE=3 SV=1	1.58381
A0A161XIS1	Uncharacterized protein OS=Daucus carota subsp. sativus OX=79200 GN=DCAR_007886 PE=4 SV=1	1.57118
A0A175YLM7	Sucrose synthase OS=Daucus carota subsp. sativus OX=79200 GN=DCAR_028527 PE=3 SV=1	1.55569
A0A164XH24	Malate synthase OS=Daucus carota subsp. sativus OX=79200 GN=DCAR_016413 PE=3 SV=1	1.53497
A0A166ETS4	UDP-glucose 4-epimerase OS=Daucus carota subsp. sativus OX=79200 GN=DCAR_007808 PE=3 SV=1	1.53483
A0A175YIG0	Pyrophosphate--fructose 6-phosphate 1-phosphotransferase subunit beta OS=Daucus carota subsp. sativus OX=79200 GN=PFP-BETA PE=3 SV=1	1.52886
A0A166FRS9	ATP-dependent 6-phosphofructokinase OS=Daucus carota subsp. sativus OX=79200 GN=PFK PE=3 SV=1	1.52428
A0A164VXV8	Acetolactate synthase OS=Daucus carota subsp. sativus OX=79200 GN=DCAR_021621 PE=3 SV=1	1.51756
A0A166E0R0	RmlD_sub_bind domain-containing protein OS=Daucus carota subsp. sativus OX=79200 GN=DCAR_006768 PE=4 SV=1	1.5053
A0A164TUM2	Pectinesterase OS=Daucus carota subsp. sativus OX=79200 GN=DCAR_025095 PE=3 SV=1	0.649729
A0A164X8M0	Pectinesterase OS=Daucus carota subsp. sativus OX=79200 GN=DCAR_016089 PE=3 SV=1	0.648638
A0A165YJ38	Non-reducing end alpha-L-arabinofuranosidase OS=Daucus carota subsp. sativus OX=79200 GN=DCAR_013510 PE=3 SV=1	0.640598
A0A164WFH3	Uncharacterized protein OS=Daucus carota subsp. sativus OX=79200 GN=DCAR_020920 PE=3 SV=1	0.632759
A0A165Z332	Uncharacterized protein OS=Daucus carota subsp. sativus OX=79200 GN=DCAR_013084 PE=3 SV=1	0.628664
A0A166IZB4	Uncharacterized protein OS=Daucus carota subsp. sativus OX=79200 GN=DCAR_004308 PE=3 SV=1	0.627919
A0A164UVC9	Uncharacterized protein OS=Daucus carota subsp. sativus OX=79200 GN=DCAR_023229 PE=3 SV=1	0.62732
A0A164YQZ4	Beta-fructofuranosidase OS=Daucus carota subsp. sativus OX=79200 GN=DCAR_018105 PE=3 SV=1	0.594448
A0A166AF02	Glyco_transf_20 domain-containing protein OS=Daucus carota subsp. sativus OX=79200 GN=DCAR_009902 PE=3 SV=1	0.510711
A0A161ZRJ3	Endoglucanase OS=Daucus carota subsp. sativus OX=79200 GN=DCAR_022313 PE=3 SV=1	0.368103
